# Supplementary material for: Integrated proteomics and phosphoproteomics revealed druggable kinases in neoadjuvant chemotherapy resistant tongue cancer
Source: Front Cell Dev Biol. 2022 Oct 28;10:957983. doi: 10.3389/fcell.2022.957983 (PMC9651967; doi:10.3389/fcell.2022.957983)
Supplement: Supplementary file 1 [file Table1.xlsx]

## Sheet: S1
S1: Clinicopathological details of the patients included in the study
Gender	Stage	Age	Patient Id	Rx regimen	Number of cycles	Response after cycle	Response after cycle		Surgery	Imaging
Male	IV	29	DC76	DCF	3	2	Responder		yes	MRI
Female	IV	48	DC97	DC	3	2	Responder		yes	MRI
Male	IV	35	DC148	DC	3	2	Responder		yes	MRI
Male	IV	55	DC160	DCF	3	2	Responder		yes	MRI
Male	IV	41	DC14	DCF	1	1	Non Responder		no	MRI
Male	IV	51	DC22	DCF	2	2	Non Responder		no	MRI
Male	IV	61	DC55	DCF	2	2	Non Responder		no	MRI
Male	IV	40	DC152	DCF	2	2	Non Responder		no	MRI

## Sheet: S2
S2: Global proteome of NACT resistant and sensitive tongue cancer patients
Gene Symbol	log p value	p value	Difference	fold change	Symbol color	Symbol type	Symbol size	Show label	DC76	DC97	DC148	DC160	DC14	DC22	DC55	DC152
AHNAK	0.138044	0.727706	-0.169062	0.889421	Color2 [DarkGray]	1	4		0.0459636	-0.767016	0.167475	0.254052	-1.26009	-0.0152565	0.659909	-0.360334
PLEC	0.302968	0.497773	-0.230989	0.85205	Color2 [DarkGray]	1	4		0.388131	0.0459203	-0.178617	0.204041	-0.758119	0.67307	-0.263285	-0.116148
PLEC	0.159502	0.692625	-0.0497422	0.966109	Color2 [DarkGray]	1	4		0.228647	0.12053	-0.228518	-0.00626645	-0.00244448	0.159291	-0.165052	-0.0763712
PLEC	0.365636	0.430888	-0.19796	0.871783	Color2 [DarkGray]	1	4		0.0332138	0.195524	-0.0272912	0.187748	-0.49369	0.55598	-0.201768	-0.263166
DSP	0.0292273	0.934916	-0.038679	0.973546	Color2 [DarkGray]	1	4		0.0331338	-0.22878	-0.02721	0.042331	-1.27122	0.111197	0.906427	-0.0816424
MYH9	0.53745	0.290101	-0.160822	0.894515	Color2 [DarkGray]	1	4		0.323381	0.0324421	-0.097	0.0810252	-0.0107203	0.0194743	0.0802291	-0.392424
DYNC1H1	0.292914	0.509431	0.0576974	1.0408	Color2 [DarkGray]	1	4		0.0462146	-0.0730477	-0.0461871	0.0138367	-0.0947474	0.161791	0.192036	-0.087474
APOB	0.0380711	0.916071	0.0979646	1.07026	Color2 [DarkGray]	1	4		1.44694	0.134682	-0.689425	-0.176731	2.37133	-1.12733	-0.541326	0.404655
FLNA	0.112999	0.770905	-0.0739614	0.950026	Color2 [DarkGray]	1	4		0.536508	-0.20143	-0.0220271	0.00519929	-0.282451	0.486782	0.0966446	-0.278572
AHNAK2	0.0455426	0.900445	-0.0586966	0.960131	Color2 [DarkGray]	1	4		0.899419	-0.144174	0.110707	-0.344051	-0.528784	0.642718	0.738026	-0.564845
FLNB	0.350154	0.446525	-0.267754	0.830612	Color2 [DarkGray]	1	4		0.120148	0.846164	-0.219403	0.107517	-0.357248	-0.0963003	0.636282	-0.399325
FLNB	0	1	NaN	#VALUE!	Color2 [DarkGray]	1	4		NaN	NaN	NaN	NaN	NaN	NaN	NaN	NaN
MACF1	0.00356341	0.991829	0.00237026	1.00164	Color2 [DarkGray]	1	4		-0.113854	0.00293568	-0.37743	0.122904	-0.662901	0.198487	0.0805394	0.0279114
MACF1	0.144446	0.717058	-0.134382	0.91106	Color2 [DarkGray]	1	4		0.0117944	0.0686641	-0.146747	-0.0111746	-1.14836	0.500427	0.0368764	-0.00393491
TLN1	1.63531	0.0231576	-0.396187	0.759864	Color2 [DarkGray]	1	4		0.529552	0.0120195	0.217518	0.160545	0.0216073	-0.126875	-0.263746	-0.296099
PRKDC	0.261621	0.547494	0.0818474	1.05837	Color2 [DarkGray]	1	4		-0.146706	-0.0394463	-0.0555443	0.0608804	0.0725623	0.0482268	-0.28182	0.307604
SPTAN1	0.54242	0.2868	-0.235591	0.849337	Color2 [DarkGray]	1	4		0.165368	-0.149335	0.300036	0.0111457	-0.639283	-0.0899001	0.208386	-0.0943513
COL6A3	0.255755	0.554938	-0.314691	0.804023	Color2 [DarkGray]	1	4		0.652099	-1.1541	0.809508	0.0513127	-0.776926	-0.0656135	0.325926	-0.38333
COL6A3	0.35246	0.444161	-0.513173	0.70068	Color2 [DarkGray]	1	4		0.804155	-1.44358	0.835303	0.225805	-1.2141	-0.28723	0.369927	-0.49961
EPPK1	0.00484634	0.988903	0.00587406	1.00408	Color2 [DarkGray]	1	4		-0.158223	0.15327	-0.616437	0.682786	-0.481689	0.184156	0.799044	-0.41662
EPPK1	0.090725	0.811475	-0.174372	0.886153	Color2 [DarkGray]	1	4		0.151171	-0.221072	-1.07911	1.40837	-1.34574	0.205581	0.906915	-0.204872
C3	0.086201	0.819972	0.138024	1.1004	Color2 [DarkGray]	1	4		0.0937697	0.839365	-0.443141	-0.0969361	1.39329	-0.911755	-0.271455	0.735072
ALB	0.0341069	0.924471	0.0445866	1.03139	Color2 [DarkGray]	1	4		-0.116126	0.207793	0.0692673	-0.164907	1.02639	-1.11286	0.000133624	0.260715
IQGAP1	0.836842	0.145599	-0.26334	0.833157	Color2 [DarkGray]	1	4		-0.0554608	0.103996	0.162529	0.108465	-0.578387	0.0244892	0.0751297	-0.255064
EVPL	0.0680149	0.855037	-0.149045	0.901847	Color2 [DarkGray]	1	4		0.378267	-1.01864	0.845101	-0.130948	-1.80809	0.112553	1.45734	-0.284203
TNC	0.801469	0.157954	-0.664126	0.631071	Color2 [DarkGray]	1	4		1.22053	-0.517836	0.166612	0.71121	0.0234941	0.0264103	-0.456387	-0.669508
KRT14	0.189563	0.646304	-0.159921	0.895074	Color2 [DarkGray]	1	4		0.240931	-0.221924	-0.230839	0.167071	-0.861723	0.217713	0.456537	-0.496972
EVPL	0.0207266	0.953396	0.0319669	1.02241	Color2 [DarkGray]	1	4		0.322811	-0.653662	0.695174	-0.0265394	-0.791795	-0.00588813	1.31932	-0.0559817
TNC	0.872629	0.134082	-0.636848	0.643117	Color2 [DarkGray]	1	4		1.42092	-0.0285014	0.0067368	0.818154	0.202686	-0.0467286	-0.363682	-0.122362
PPL	0.0905865	0.811734	-0.117862	0.921552	Color2 [DarkGray]	1	4		0.299134	-0.372552	0.722305	-0.0668579	-0.883621	-0.0991217	1.11041	-0.0170813
COL12A1	0.185185	0.652852	-0.235351	0.849478	Color2 [DarkGray]	1	4		0.786882	-0.449114	-0.468467	0.580866	-0.530828	0.348318	-0.945553	0.636825
CLTC	0.165785	0.682676	0.0707632	1.05027	Color2 [DarkGray]	1	4		-0.464074	0.167291	0.0199505	-0.000996812	-0.0108142	-0.00980868	0.237661	-0.211814
COL12A1	0.554908	0.278671	-0.286589	0.819838	Color2 [DarkGray]	1	4		0.123703	0.169152	-0.381441	0.512375	-0.106371	0.151537	-0.595367	-0.172367
SPTBN1	0.888702	0.129211	-0.27861	0.824385	Color2 [DarkGray]	1	4		0.0273458	0.103882	0.262444	-0.0284662	-0.513178	0.030341	0.0836129	-0.350008
KRT6A	0.240607	0.574636	-0.205937	0.866976	Color2 [DarkGray]	1	4		0.0573253	-0.26145	-0.0522306	0.0515412	-1.0485	0.17621	0.422368	-0.578637
KRT6B	0.21595	0.608205	-0.224404	0.855949	Color2 [DarkGray]	1	4		0.45701	-0.389823	-0.168688	0.118255	-1.15772	0.15425	0.554416	-0.431807
ACTN1	0.130561	0.740353	-0.0689639	0.953322	Color2 [DarkGray]	1	4		-0.113183	0.478436	-0.313072	0.0755945	0.0675427	-0.0179795	0.13926	-0.336903
KRT6C	0.156416	0.697563	0.196868	1.14621	Color2 [DarkGray]	1	4		-0.114616	-0.0208717	0.583132	-0.00604502	-0.382806	0.337064	1.58517	-0.310352
ACTN1	0.499138	0.316856	-0.190575	0.876256	Color2 [DarkGray]	1	4		0.223162	0.21095	-0.295087	0.0470107	-0.199654	0.0808694	0.018981	-0.476463
FASN	0.0158597	0.96414	0.0127332	1.00887	Color2 [DarkGray]	1	4		-0.217229	-0.399168	0.578096	0.208234	-0.23784	0.00815982	0.510745	-0.0601982
ACTN4	0.119464	0.759514	-0.0286979	0.980305	Color2 [DarkGray]	1	4		-0.0982962	0.072554	-0.0502177	0.022616	-0.118305	0.0572572	0.124036	-0.231123
KRT16	0.0410539	0.9098	-0.0352689	0.97585	Color2 [DarkGray]	1	4		-0.161924	0.0410124	0.0133087	-0.0495365	-0.883984	0.185812	0.492488	-0.0925304
A2M	0.119057	0.760227	0.194626	1.14443	Color2 [DarkGray]	1	4		-0.195162	0.849403	-0.414187	0.0919738	1.63195	-0.975052	-0.0321828	0.485818
TNC	0.223125	0.598239	-0.299466	0.812553	Color2 [DarkGray]	1	4		1.78451	-0.690176	0.171761	0.0405549	-0.0903195	0.397718	0.0260533	-0.224664
KRT5	0.205817	0.622563	-0.177245	0.88439	Color2 [DarkGray]	1	4		0.173008	-0.294807	-0.184863	0.132395	-0.849997	0.185937	0.462416	-0.681602
FN1	0.096853	0.800105	0.111653	1.08047	Color2 [DarkGray]	1	4		0.730621	-0.585844	-0.351963	0.239391	0.969569	-0.0773837	-0.433727	0.0203603
HSPG2	0.735685	0.183787	-0.402928	0.756322	Color2 [DarkGray]	1	4		0.495607	-0.447287	0.734789	0.32574	-0.069701	-0.346296	-0.126929	0.0400639
KRT17	0.0220395	0.950518	-0.0327709	0.977541	Color2 [DarkGray]	1	4		0.119963	-0.112319	-1.42366	0.522022	-0.7832	0.224788	0.236984	-0.703647
KTN1	0.176067	0.666704	-0.146944	0.903161	Color2 [DarkGray]	1	4		0.333817	-0.0678962	-0.141307	0.218339	-0.59026	0.704655	0.148906	-0.508126
RNF213	0.388394	0.408889	-0.374309	0.771475	Color2 [DarkGray]	1	4		-0.0651969	1.24002	-0.0700404	0.0323739	0.315741	0.45233	-0.542596	-0.585559
TNC	0.438151	0.364627	-0.716185	0.608705	Color2 [DarkGray]	1	4		1.95973	-1.38906	0.299784	0.26522	-0.833961	0.280845	-0.780173	-0.39578
KRT13	0.0691954	0.852716	-0.156531	0.89718	Color2 [DarkGray]	1	4		0.628002	-0.510677	2.26353	-0.217067	0.0363469	0.0137372	1.89597	-0.408386
SYNE2	0.114921	0.767501	0.0432692	1.03045	Color2 [DarkGray]	1	4		0.253835	0.055946	-0.374663	-0.102777	-0.118862	0.0920567	0.0247836	0.00743916
VCL	0.545765	0.2846	-0.187562	0.878088	Color2 [DarkGray]	1	4		0.247408	-0.239192	0.0225541	0.150403	-0.226511	0.0210542	0.0786266	-0.442245
SPTA1	0.649779	0.223986	1.00972	2.01352	Color2 [DarkGray]	1	4		0.369931	-0.180797	-0.793316	-0.0867847	1.57675	-0.651192	2.42099	0.00137658
C4B	0.101944	0.790781	0.209284	1.15611	Color2 [DarkGray]	1	4		0.139104	0.221904	-0.285696	-0.148928	1.77734	-1.18777	-0.966595	1.14055
MYH10	0.613482	0.243511	-0.174581	0.886025	Color2 [DarkGray]	1	4		0.0168399	0.1172	-0.0108292	0.193357	0.216903	-0.000257997	-0.33516	-0.263241
FGB	0.774607	0.168032	1.29413	2.45229	Color2 [DarkGray]	1	4		1.08774	-0.207164	-0.646172	-0.155202	2.82214	0.017677	0.0820481	2.33385
PKM	0.172961	0.671489	-0.103854	0.930544	Color2 [DarkGray]	1	4		-0.358989	0.562548	-0.0814805	0.185888	-0.240257	0.224733	0.153215	-0.245139
C4A	0.608874	0.246108	0.897209	1.86246	Color2 [DarkGray]	1	4		0.0655737	-0.0520752	-0.121035	0.204999	2.72244	-0.218057	-0.125522	1.30744
HSP90AB1	0.142371	0.720491	-0.0640401	0.956582	Color2 [DarkGray]	1	4		-0.104042	0.391793	-0.099247	0.247777	-0.184232	0.367738	-0.0208468	0.0174618
KRT10	1.83813	0.0145167	1.96093	3.89312	Color2 [DarkGray]	1	4		-0.740231	-0.754462	-1.00418	-0.182813	0.564337	0.155846	2.42963	2.01221
JUP	0.0220297	0.95054	0.0294924	1.02065	Color2 [DarkGray]	1	4		-0.103428	-0.144074	0.0776525	-0.0466638	-1.27706	0.383443	0.831373	-0.036298
TF	0.201649	0.628566	0.285082	1.21848	Color2 [DarkGray]	1	4		-0.186627	0.136665	-0.123699	-0.699066	1.29236	-1.30123	0.190751	0.085723
HSP90AA1	0.0742633	0.842824	-0.0604299	0.958978	Color2 [DarkGray]	1	4		0.0930276	0.129013	-0.361295	0.166708	-0.532812	0.698948	-0.24279	-0.137611
EEF2	0.0686661	0.853756	0.0425711	1.02995	Color2 [DarkGray]	1	4		-0.302088	-0.0520728	0.0997547	-0.0188181	-0.587504	0.323454	0.224789	-0.0636797
TNKS1BP1	0.0523702	0.8864	-0.0469063	0.96801	Color2 [DarkGray]	1	4		-0.00410944	-0.0495079	-0.12799	0.0620667	-1.00074	0.2161	0.114659	0.362812
MAP4	0.365859	0.430667	-0.272008	0.828166	Color2 [DarkGray]	1	4		0.0622064	-0.166233	-0.0573836	0.283748	-1.08387	0.16248	0.263998	-0.308301
VCP	0.666872	0.215341	-0.233995	0.850277	Color2 [DarkGray]	1	4		0.260185	0.103876	-0.137603	0.0424063	-0.539829	0.110329	0.0240318	-0.261646
GCN1	0.285453	0.518259	-0.10168	0.931947	Color2 [DarkGray]	1	4		-0.0597989	0.0199404	0.17849	0.0828496	-0.0571075	-0.424376	0.0631087	0.233136
SPTB	0.767032	0.170989	1.00298	2.00413	Color2 [DarkGray]	1	4		0.2526	-0.105012	-0.425901	-0.120112	1.59653	-0.330343	2.31688	0.0304168
CTNNA1	0.0591716	0.872627	-0.0512233	0.965118	Color2 [DarkGray]	1	4		-0.151497	-0.180694	0.124973	0.0155736	-0.892235	0.0532375	0.541455	-0.0989946
PKM	0.549772	0.281986	0.245232	1.18528	Color2 [DarkGray]	1	4		-0.404363	0.00196786	-0.148369	0.364481	-0.09308	0.513919	0.081519	0.292286
HSPD1	0.337866	0.45934	0.228184	1.17136	Color2 [DarkGray]	1	4		-0.525099	0.133746	-0.12197	0.00325265	0.487465	0.526008	-0.524661	-0.0861459
MAP4	0.0494843	0.89231	-0.0229978	0.984186	Color2 [DarkGray]	1	4		0.140263	-0.182469	0.0370881	0.260161	-0.0140737	-0.0882342	-0.163871	0.42923
MAP4	0.899469	0.126047	-0.637493	0.642829	Color2 [DarkGray]	1	4		0.0582111	0.166892	-0.00625211	0.0486706	-1.50548	0.00100197	-0.0260686	-0.751907
HSPA8	0.413936	0.385535	-0.22337	0.856562	Color2 [DarkGray]	1	4		0.0646518	0.113695	-0.136842	-0.000705817	-0.759365	0.261535	0.0697371	-0.424588
IVL	0.103355	0.788215	-0.200221	0.870417	Color2 [DarkGray]	1	4		0.469218	-0.70625	-0.0726142	0.532621	-1.58626	0.0652184	1.52492	-0.581796
PKP1	0.00470861	0.989217	-0.00721559	0.995011	Color2 [DarkGray]	1	4		0.115907	-0.219049	0.0290622	-0.0661153	-1.4198	0.412355	0.946493	-0.10811
MYOF	0.444728	0.359147	-0.216372	0.860727	Color2 [DarkGray]	1	4		0.208404	-0.296775	0.180116	0.125203	-0.189787	-0.152126	0.294521	-0.601147
A2ML1	0.181805	0.657953	-0.191878	0.875465	Color2 [DarkGray]	1	4		-0.0923908	-0.359881	1.04103	0.0847795	-0.678465	-0.288	0.412232	0.460262
SPTBN2	0.0021475	0.995067	0.00274576	1.00191	Color2 [DarkGray]	1	4		0.366603	-1.15906	0.155968	-0.116513	-0.571742	-0.644616	0.446314	0.0280244
C5	0.225218	0.595363	0.550517	1.46461	Color2 [DarkGray]	1	4		0.106412	0.79672	-0.421695	-0.111085	3.03718	-1.11515	-0.608806	1.25919
MX1	0.360301	0.436213	-0.651003	0.636837	Color2 [DarkGray]	1	4		-0.194258	1.45403	0.172251	0.487124	-0.257786	1.80228	-0.858833	-1.37052
ACTG1	0.109576	0.777006	-0.0366934	0.974887	Color2 [DarkGray]	1	4		-0.00648471	0.352531	0.011988	-0.111017	0.168094	-0.0395405	0.117789	-0.1461
MSN	0.459416	0.347203	-0.285357	0.820539	Color2 [DarkGray]	1	4		0.185826	0.0871323	-0.0993361	0.0590391	-0.52731	0.472625	-0.0820233	-0.772058
HSPA1B	0.0824609	0.827064	0.111488	1.08034	Color2 [DarkGray]	1	4		0.441222	-0.796525	-0.640324	0.456307	-0.831946	0.757376	0.326505	-0.345302
HSP90B1	0.808282	0.155496	-0.281108	0.822959	Color2 [DarkGray]	1	4		0.0258374	0.245122	-0.0198286	-0.108834	-0.320712	0.0362087	-0.653151	-0.0444793
SBSN	0.0315121	0.930011	0.0650722	1.04614	Color2 [DarkGray]	1	4		0.176519	-0.660035	0.469984	-0.0820744	-1.41566	-0.23679	1.82007	-0.00294227
COL7A1	0.250338	0.561903	-0.228111	0.853752	Color2 [DarkGray]	1	4		0.467682	-0.566027	-0.0985553	0.680907	-0.764108	0.0888017	-0.128897	0.375766
A2ML1	0.552716	0.280081	-0.231804	0.85157	Color2 [DarkGray]	1	4		0.0514118	-0.0371508	0.597821	0.00306937	0.141704	-0.426737	0.0658457	-0.0928761
COPA	0.0788597	0.833951	0.015934	1.01111	Color2 [DarkGray]	1	4		-0.209788	0.111698	0.0311348	-0.0304058	0.0152376	0.0509928	-0.0476978	-0.0521577
SAMD9	0.164076	0.685369	-0.189622	0.876836	Color2 [DarkGray]	1	4		-0.153209	1.06885	-0.498418	0.505296	-0.151696	0.686431	0.245369	-0.616075
VIM	0.979696	0.104786	-0.493661	0.710221	Color2 [DarkGray]	1	4		0.608227	-0.185512	0.61618	0.104001	-0.645211	0.0080938	0.0916706	-0.286302
NUMA1	0.242199	0.572534	-0.138882	0.908223	Color2 [DarkGray]	1	4		0.317943	-0.430699	0.25271	0.0524984	-0.0367554	-0.50956	-0.0835137	0.266753
PRPF8	0.775959	0.16751	-0.123741	0.917805	Color2 [DarkGray]	1	4		-0.101239	0.0588443	0.0461375	-0.00665152	-0.210688	0.0496076	-0.260814	-0.0759785
LMNA	0.252949	0.558536	-0.211812	0.863452	Color2 [DarkGray]	1	4		0.323162	-0.241225	0.109131	-0.0939443	-1.10244	0.327601	0.155125	-0.130415
UBA1	0.236452	0.58016	-0.113718	0.924203	Color2 [DarkGray]	1	4		-0.147951	0.529301	0.172052	-0.0513938	0.0519864	-0.00199035	0.299175	-0.302034
ATP5F1B	0.903875	0.124774	0.237692	1.1791	Color2 [DarkGray]	1	4		-0.271866	-0.0501361	0.181426	-0.389733	0.136192	-0.0163957	0.115689	0.184973
ITGB4	0.0076322	0.98258	0.00911004	1.00633	Color2 [DarkGray]	1	4		-0.0762667	0.128985	-0.338915	-0.0232462	-1.11931	0.752223	0.0925475	0.00153671
ITGB4	0.0878939	0.816782	-0.075018	0.94933	Color2 [DarkGray]	1	4		0.624786	0.363517	-0.354774	0.00311743	0.0133953	0.725352	-0.316167	-0.0860065
DSG3	0.0914985	0.810031	-0.112159	0.925203	Color2 [DarkGray]	1	4		0.18666	-0.213461	0.162204	-0.0999153	-1.17769	0.0852325	0.928435	-0.249125
HSPA4	0.152142	0.704462	-0.0911586	0.938769	Color2 [DarkGray]	1	4		0.0131192	-0.00957139	-0.0118632	0.149137	-0.686212	0.316436	0.219513	-0.0735503
LRPPRC	0.686544	0.205805	0.165629	1.12165	Color2 [DarkGray]	1	4		0.0615538	-0.302772	0.0655004	-0.0620359	0.31097	-0.052948	0.0294689	0.137271
DST	0.0345697	0.923486	-0.0392337	0.973172	Color2 [DarkGray]	1	4		0.698953	-0.0116974	-0.318796	0.328905	-0.296511	1.09766	-0.204124	-0.0565912
LTF	0.471991	0.337294	-0.848269	0.555451	Color2 [DarkGray]	1	4		1.38175	0.137632	-1.4089	0.422932	0.61484	-1.27321	-1.97944	-0.22186
WARS	0.4277	0.373508	-0.959416	0.514265	Color2 [DarkGray]	1	4		-0.000433461	3.74792	-0.350184	0.72291	0.0614272	1.06978	-0.335732	-0.512929
HUWE1	0.0266888	0.940397	-0.0123686	0.991463	Color2 [DarkGray]	1	4		0.172305	-0.0793406	0.135969	0.0160487	-0.000972632	-0.027537	0.462758	-0.238741
EPRS	0.158891	0.6936	0.06745	1.04786	Color2 [DarkGray]	1	4		-0.113787	-0.310402	0.0349692	-0.0251638	-0.469806	0.114522	0.0944553	0.116245
FGA	0.755453	0.175609	1.16001	2.23459	Color2 [DarkGray]	1	4		1.02079	-0.28326	-0.746822	-0.194424	2.44373	-0.245184	0.245001	1.99279
HSPA5	0.494853	0.319998	-0.160465	0.894737	Color2 [DarkGray]	1	4		-0.0121928	0.0498768	-0.07743	0.0426289	-0.45457	0.182368	-0.337397	-0.0293789
RRBP1	0.3171	0.481837	-0.24048	0.846464	Color2 [DarkGray]	1	4		0.0562459	-0.310991	-0.026729	-0.00901792	-1.19319	0.0930377	-0.30374	0.151481
HSPH1	0.236481	0.580121	-0.262628	0.833568	Color2 [DarkGray]	1	4		0.207244	0.729536	-0.356255	0.550392	-0.579025	1.12677	-0.123859	-0.343483
PGK1	0.0383998	0.915377	0.0347062	1.02435	Color2 [DarkGray]	1	4		-0.136158	0.070032	-0.0919911	0.247277	-0.629509	0.838173	0.00836826	0.0109525
HDLBP	0.136471	0.730346	-0.059893	0.959335	Color2 [DarkGray]	1	4		0.196401	-0.161454	-0.00995275	0.11838	-0.416988	0.00473893	0.0260345	0.290016
KRT1	2.71865	0.00191138	2.41142	5.31999	Color2 [DarkGray]	1	4		-0.52498	-0.633782	-0.973506	-0.923068	0.435371	1.5515	2.14449	2.459
SNRNP200	0.031765	0.929469	0.00890699	1.00619	Color2 [DarkGray]	1	4		-0.165314	-0.0123309	-0.0267458	-0.014465	0.0862504	0.0258149	-0.308925	0.0136316
PLG	0.282078	0.522302	0.543337	1.45734	Color2 [DarkGray]	1	4		1.30161	0.253774	-0.598474	-0.377908	2.26995	-0.629766	-0.227651	1.33982
LMNA	0.147918	0.711348	-0.0629495	0.957305	Color2 [DarkGray]	1	4		0.0921803	-0.126752	0.127398	-0.178699	0.0947396	0.16025	-0.473909	-0.118751
LAMA3	0.0738214	0.843682	-0.13017	0.913724	Color2 [DarkGray]	1	4		1.25406	0.0222901	-0.445389	-0.0496375	0.937001	0.796582	-1.28176	-0.191182
MVP	0.356343	0.440207	-0.175877	0.885229	Color2 [DarkGray]	1	4		0.0382799	0.505625	-0.0905681	0.200609	-0.242295	-0.00734478	0.465234	-0.265157
EIF3A	0.278461	0.52667	-0.116449	0.922456	Color2 [DarkGray]	1	4		0.0318597	-0.0765406	-0.00980565	0.114427	-0.556967	0.210705	0.0844357	-0.144028
GAPDH	0.0607038	0.869553	0.084004	1.05996	Color2 [DarkGray]	1	4		-1.46301	0.180549	0.487588	0.0520541	-0.559893	0.515619	-0.224135	-0.138393
GAPDH	0.103933	0.787168	0.0390264	1.02742	Color2 [DarkGray]	1	4		-0.367633	-0.0429291	0.0533724	0.0315525	-0.304774	0.107634	0.10673	-0.0791222
SERPINA1	0.118703	0.760846	0.178785	1.13193	Color2 [DarkGray]	1	4		-0.856088	0.643878	0.104188	-0.150613	1.31146	-0.881409	-0.278336	0.304794
COPG1	0.156172	0.697956	-0.0291077	0.980026	Color2 [DarkGray]	1	4		-0.0105314	0.0699561	0.0323152	-0.0153855	0.0350016	0.162234	-0.142869	-0.0944429
FGG	0.696384	0.201195	1.15845	2.23217	Color2 [DarkGray]	1	4		0.994229	-0.0798365	-0.68638	-0.255285	2.7008	-0.298916	0.159801	2.04484
TUBB4B	0.560788	0.274924	0.19517	1.14486	Color2 [DarkGray]	1	4		-0.513543	0.216682	0.0124106	-0.15882	-0.0385081	0.114389	0.0617023	0.199827
EZR	0.392293	0.405235	-0.208725	0.865302	Color2 [DarkGray]	1	4		-0.325621	0.067808	0.151697	0.0686184	-0.836178	0.0190068	0.0158741	-0.0710998
CP	0.269642	0.537474	-0.442723	0.735745	Color2 [DarkGray]	1	4		-0.341164	1.17789	0.0918244	-0.118932	-1.90309	-0.0710727	0.166529	0.846362
CP	0.176111	0.666636	0.272471	1.20788	Color2 [DarkGray]	1	4		-0.0847474	1.13564	-0.0835011	0.0447545	1.95025	-0.362813	-0.151039	0.665624
LCP1	0.785061	0.164036	-0.230723	0.852208	Color2 [DarkGray]	1	4		-0.0277447	0.134522	0.264462	0.00745011	0.104044	-0.0185405	-0.496288	-0.133418
FBN1	0.112022	0.772641	-0.185098	0.879589	Color2 [DarkGray]	1	4		1.24249	-1.38055	0.503374	0.0822639	-0.613129	-0.100687	0.650049	-0.229045
UBR4	0.373975	0.422693	0.100619	1.07223	Color2 [DarkGray]	1	4		-0.032574	0.00144651	-0.0927154	0.104758	0.231371	0.00220125	0.315344	-0.165525
FAM83H	0.181667	0.658162	-0.112465	0.925006	Color2 [DarkGray]	1	4		-0.0953189	0.40095	-0.376311	0.240678	-0.515834	0.212345	0.165409	-0.141782
TPR	0.601783	0.250159	-0.180954	0.882119	Color2 [DarkGray]	1	4		0.13353	-0.0560791	-0.0189814	0.0799663	-0.54812	0.0137764	-0.0662805	0.0152432
ATP2A2	0.518796	0.302833	-0.131883	0.91264	Color2 [DarkGray]	1	4		-0.03242	0.348533	-0.027966	0.0881859	0.0538888	0.0226584	0.0362062	-0.263951
CFH	0.270559	0.536341	0.497901	1.41216	Color2 [DarkGray]	1	4		0.0338296	0.561989	-0.321673	-0.0332611	2.61917	-0.63978	-0.351459	0.604557
TUBB	0.249714	0.562712	0.295913	1.22766	Color2 [DarkGray]	1	4		-1.77904	0.187903	0.064538	0.0436041	0.249458	-0.200245	-0.219473	-0.129081
KIF5B	0.705726	0.196913	-0.310046	0.806616	Color2 [DarkGray]	1	4		0.0464614	0.396097	-0.0408888	0.0985139	-0.653996	-0.157091	0.282347	-0.211261
MYH11	0.290145	0.512691	-0.30907	0.807162	Color2 [DarkGray]	1	4		0.241507	-0.888681	0.813405	0.447925	-0.220016	-0.302449	-0.643438	0.543778
TUBB2A	0.0858151	0.820701	-0.0317228	0.978251	Color2 [DarkGray]	1	4		-0.248087	0.307285	-0.0337159	0.183791	0.0177812	0.0282853	0.15114	-0.114825
PYGL	0.468787	0.339792	-0.179112	0.883246	Color2 [DarkGray]	1	4		0.261663	0.0511319	-0.244362	0.0311814	-0.453064	0.204135	-0.252308	-0.115598
EIF4G1	0.1416	0.721771	-0.109073	0.927184	Color2 [DarkGray]	1	4		-0.0606548	0.0418941	-0.0649851	0.132223	-0.889766	0.419139	0.22143	-0.138617
ANXA6	0.228434	0.590971	-0.242235	0.845434	Color2 [DarkGray]	1	4		0.739581	-0.309476	0.6587	-0.0819345	0.959321	-0.372566	-0.545754	-0.00307092
CRYBG1	0.0493649	0.892555	-0.0449685	0.969311	Color2 [DarkGray]	1	4		0.31475	-0.309696	-0.0280197	-0.0077489	-0.606398	0.211917	0.643372	-0.459479
COL14A1	0.0919019	0.809279	-0.17485	0.88586	Color2 [DarkGray]	1	4		0.0215632	-0.746439	2.10544	0.184219	-0.224412	0.00957681	1.21369	-0.133474
LDHA	0.0352251	0.922093	-0.0252736	0.982634	Color2 [DarkGray]	1	4		-0.476096	0.558409	-0.00114818	0.104364	-0.23223	0.371224	0.0215822	-0.0761417
EEF1A1	0.398505	0.39948	-0.168235	0.889931	Color2 [DarkGray]	1	4		0.00858557	0.0062134	0.0362927	0.0850844	-0.658001	0.205509	-0.00814163	-0.0761288
TKT	0.713081	0.193606	-0.269451	0.829635	Color2 [DarkGray]	1	4		0.000906408	0.0137207	0.406845	0.223479	-0.367381	-0.376847	0.0652044	0.246171
ATP1A1	0.49527	0.31969	0.230835	1.17351	Color2 [DarkGray]	1	4		0.0139389	-0.714422	0.00952385	0.0136583	-0.141901	-0.0672608	0.0970102	0.358191
GANAB	0.45336	0.352079	0.116643	1.08421	Color2 [DarkGray]	1	4		0.0129119	-0.0876673	0.117092	-0.331136	0.095924	0.203327	-0.067704	-0.0537763
DHX9	0.401911	0.396359	0.0577037	1.04081	Color2 [DarkGray]	1	4		-0.13403	-0.0384926	0.0163615	0.0404769	-0.0698914	0.15573	-0.0281198	0.0574121
ANXA6	0.11872	0.760816	-0.142126	0.906183	Color2 [DarkGray]	1	4		0.105168	-0.518796	0.33005	-0.109681	0.609456	-0.557698	-1.15764	0.344115
DSG1	0.452465	0.352806	0.608489	1.52466	Color2 [DarkGray]	1	4		0.116639	-0.639324	-0.417963	-0.122725	-1.38402	1.02642	0.691712	1.03648
GANAB	1.10677	0.0782047	0.321302	1.24946	Color2 [DarkGray]	1	4		-0.581224	-0.140644	0.13626	-0.256867	0.0952847	0.158375	0.032462	0.156613
LAMB3	0.0719306	0.847363	-0.112798	0.924793	Color2 [DarkGray]	1	4		1.11181	-0.177019	-0.498006	0.132162	0.882438	0.617071	-1.02076	-0.360989
STAT1	0.29857	0.50284	-0.408456	0.753429	Color2 [DarkGray]	1	4		0.0951539	1.45152	-0.46424	-0.0984726	0.594783	0.431505	-0.792772	-0.883374
CCT2	0.158439	0.694321	-0.0663896	0.955025	Color2 [DarkGray]	1	4		-0.210095	0.203662	-0.0163184	0.107327	-0.400309	0.240702	0.0394583	-0.060835
LAP3	0.493007	0.321361	-0.638436	0.642409	Color2 [DarkGray]	1	4		-0.189367	1.99209	0.159492	0.233172	-0.37073	0.877686	-0.604574	-0.260737
XRCC5	0.27799	0.527242	-0.0950477	0.936241	Color2 [DarkGray]	1	4		0.00156093	-0.0148433	0.175368	0.0909703	-0.393784	0.239028	0.0810962	-0.0534756
TGM3	0.711473	0.194324	-0.783784	0.580841	Color2 [DarkGray]	1	4		1.00327	-0.205663	1.36433	0.145348	-1.11495	-0.177458	0.798861	-0.334305
SF3B1	0.0805359	0.830738	0.0254819	1.01782	Color2 [DarkGray]	1	4		-0.240989	-0.101503	0.158432	0.0993947	-0.0978483	0.186459	-0.0986846	0.0273362
CTNND1	0.217514	0.606019	0.120327	1.08698	Color2 [DarkGray]	1	4		-0.292559	0.0054731	-0.0269968	0.00930429	-0.481285	-0.0599337	0.498089	0.219659
PDIA4	0.809679	0.154996	-0.30002	0.812241	Color2 [DarkGray]	1	4		0.020268	0.159947	-0.0142448	0.0167694	-0.212456	-0.00401182	-0.776683	-0.0241879
CAST	0.220877	0.601344	-0.22111	0.857905	Color2 [DarkGray]	1	4		-0.0944576	-0.535675	0.266321	0.134477	-1.03482	0.462547	0.196858	-0.738358
NPEPPS	0.0905715	0.811762	0.109024	1.0785	Color2 [DarkGray]	1	4		-0.386575	-0.085047	0.0595404	0.0953424	-0.754403	0.131799	1.17737	-0.435411
GBP6	0.502173	0.31465	-0.50342	0.705433	Color2 [DarkGray]	1	4		0.128631	0.251253	0.791401	-0.136602	-0.877424	-0.189885	0.909972	-0.82166
HYOU1	0.068938	0.853222	-0.0322214	0.977913	Color2 [DarkGray]	1	4		-0.318172	0.106708	0.151099	-0.0641761	0.0825267	-0.11562	-0.401626	0.181293
AP1B1	0.0153207	0.965338	-0.00913352	0.993689	Color2 [DarkGray]	1	4		-0.436089	-0.0230868	0.0268495	0.03881	-0.485086	0.0265825	0.281999	-0.253545
SERPINB5	0.0358258	0.920819	0.0581928	1.04116	Color2 [DarkGray]	1	4		-0.00779671	0.403266	-0.400487	-0.313916	-1.50926	0.882653	0.57404	-0.0335912
PKP3	0.140492	0.723616	0.148288	1.10825	Color2 [DarkGray]	1	4		-0.19154	-0.147698	-0.0376032	0.00160457	-1.01233	0.402994	0.848505	-0.0212506
XRCC6	0.00420764	0.990358	0.00367139	1.00255	Color2 [DarkGray]	1	4		-0.741805	0.0231449	0.267705	-0.0505277	-0.694075	0.183725	-0.00767343	0.031226
AP1B1	0.00205194	0.995286	0.0031071	1.00216	Color2 [DarkGray]	1	4		-0.127179	-0.165438	0.0094509	-0.036321	-1.44675	0.232006	0.954033	-0.0463466
COL6A1	0.136997	0.729462	-0.179447	0.883041	Color2 [DarkGray]	1	4		0.64191	-1.02982	0.667188	0.0633574	-0.522557	-0.0790721	0.737649	-0.511172
WDR1	1.64489	0.0226524	-0.190242	0.876459	Color2 [DarkGray]	1	4		0.119757	0.240627	0.00963285	0.104277	-0.165378	-0.0152612	0.00700553	-0.113038
ANXA1	0.753069	0.176576	-0.432736	0.740855	Color2 [DarkGray]	1	4		0.0485881	-0.034211	0.43691	0.0357083	-0.420389	-0.241136	0.342931	-0.925356
PDIA3	0.075918	0.839618	-0.0372928	0.974482	Color2 [DarkGray]	1	4		-0.174489	0.369812	0.0603593	-0.0556342	0.0608628	0.350446	-0.277404	-0.0830286
F2	0.309393	0.490464	0.535583	1.44953	Color2 [DarkGray]	1	4		0.245029	0.28168	-0.445069	-0.285576	2.26398	-0.642517	-0.655862	0.972793
CAND1	0.271136	0.535629	-0.110272	0.926413	Color2 [DarkGray]	1	4		-0.120417	0.0260504	-0.0301123	0.124736	-0.512682	0.184612	0.104609	-0.21737
CTNND1	0.131795	0.738252	-0.158691	0.895838	Color2 [DarkGray]	1	4		0.652616	-0.491698	0.0103792	-0.0464944	-1.22806	-0.0831486	0.520855	0.280395
CLIP1	0.575918	0.265511	-0.435473	0.739451	Color2 [DarkGray]	1	4		0.0857196	0.50974	-0.137127	0.428139	-0.912193	-0.0576025	0.594669	-0.480292
HADHA	0.151144	0.706083	-0.0364139	0.975076	Color2 [DarkGray]	1	4		-0.199789	0.135035	0.0760291	0.0174652	0.0620964	-0.0896155	0.0675031	-0.156899
PLS3	0.381251	0.415671	0.323786	1.25161	Color2 [DarkGray]	1	4		-0.515615	-0.0722509	-0.208849	0.0425942	-0.817924	0.868363	0.276612	0.21397
P4HB	0.0960449	0.801595	0.0263925	1.01846	Color2 [DarkGray]	1	4		0.010587	-0.216614	-0.00464041	-0.00351979	-0.201936	0.1176	0.117478	-0.141759
KRT15	0.0329042	0.927034	-0.0392351	0.973171	Color2 [DarkGray]	1	4		-0.296139	-0.324536	0.589321	0.357643	0.160913	-0.121862	0.884347	-0.75405
PDCD6IP	0.00325382	0.992536	0.00220054	1.00153	Color2 [DarkGray]	1	4		-0.15542	0.248738	-0.014013	-0.0216427	-0.542488	0.325473	0.349024	-0.0655449
TCP1	0.156114	0.69805	-0.0612117	0.958459	Color2 [DarkGray]	1	4		-0.131256	0.196694	-0.0675086	0.0567622	-0.282144	0.217603	0.140325	-0.265939
STAT1	0.402521	0.395803	0.247692	1.18731	Color2 [DarkGray]	1	4		-0.683172	0.314615	-0.367347	0.104163	0.518848	0.0711443	-0.105073	-0.12589
CTNNB1	0.0476432	0.896101	-0.0360478	0.975323	Color2 [DarkGray]	1	4		-0.0996078	0.0303246	0.271957	-0.108605	-0.712388	-0.0275877	0.358014	0.33184
ACTA2	0.355987	0.440568	0.313641	1.24284	Color2 [DarkGray]	1	4		-0.711752	-0.818896	0.569578	-0.0489037	0.0679893	0.453863	-0.491047	0.213787
COPB1	1.08697	0.0818513	0.179275	1.13232	Color2 [DarkGray]	1	4		-0.243599	0.0379388	-0.00976071	-0.174845	0.034718	0.15098	-0.0474552	0.188593
TGM1	0.456506	0.349538	-0.377425	0.769811	Color2 [DarkGray]	1	4		0.207996	0.0952645	0.342479	-0.21287	-1.15557	-0.314953	0.564921	-0.171224
PYGB	0.0673266	0.856394	0.0649406	1.04604	Color2 [DarkGray]	1	4		0.0507469	0.239598	-0.0453418	-0.19026	0.969751	-0.533494	-0.298503	0.176752
CSE1L	0.130923	0.739736	0.0404164	1.02841	Color2 [DarkGray]	1	4		-0.268548	0.041679	-0.0810623	-0.057088	0.0758173	0.0687281	-0.3334	-0.0144987
RANBP2	0.973445	0.106305	-0.112952	0.924694	Color2 [DarkGray]	1	4		-0.00343212	0.0179272	0.0879545	0.014458	-0.166243	-0.106635	-0.142135	0.0801137
CKAP4	0.088348	0.815928	-0.0540358	0.963238	Color2 [DarkGray]	1	4		-0.302787	0.323285	-0.191053	0.136264	-0.23157	0.243929	-0.454896	0.192103
TUBA1A	0.0603115	0.870339	0.041705	1.02933	Color2 [DarkGray]	1	4		-0.62734	0.308559	-0.0253494	0.113727	0.370715	-0.0963626	-0.286061	-0.0518748
FLNC	0.562896	0.273592	0.326065	1.25359	Color2 [DarkGray]	1	4		-0.0390076	-0.570901	0.222842	0.0336959	-0.200367	0.773121	0.0334951	0.344639
PSMD2	0.0797383	0.832265	0.0289648	1.02028	Color2 [DarkGray]	1	4		-0.00611333	0.259439	-0.115064	0.107924	0.0669192	0.381515	0.0186996	-0.105089
TUBB3	0.0692743	0.852562	0.069825	1.04959	Color2 [DarkGray]	1	4		-0.741755	0.597937	-0.190186	0.0848661	-0.0735377	0.362957	0.343702	-0.60296
KRT75	0.104554	0.786042	0.231525	1.17408	Color2 [DarkGray]	1	4		0.604318	0.0774051	-0.905773	0.911732	-0.460595	2.51429	0.000975156	-0.440893
CRNN	0.0517431	0.887681	0.111024	1.07999	Color2 [DarkGray]	1	4		0.53978	-0.297896	1.42083	-0.50242	0.166286	-0.12829	2.1743	-0.607905
CAST	0.361176	0.435335	-0.201457	0.869672	Color2 [DarkGray]	1	4		-0.167691	0.0966812	0.295327	0.263978	-0.498354	0.500073	-0.0210622	-0.298186
ACO2	0.154095	0.701301	-0.0809376	0.945443	Color2 [DarkGray]	1	4		-0.219901	-0.0922025	0.520557	0.204594	-0.101748	0.09106	-0.211416	0.311401
ANK1	0.678322	0.209738	0.990032	1.98623	Color2 [DarkGray]	1	4		0.160562	-0.121876	-0.490251	-0.143872	1.55739	-0.635237	2.39752	0.0450279
KRT4	0.201292	0.629083	-0.328875	0.796157	Color2 [DarkGray]	1	4		0.0563724	-0.0423444	1.64323	-0.874689	-0.355985	-1.0503	0.156479	0.71688
TUBB6	0.0246233	0.94488	0.013894	1.00968	Color2 [DarkGray]	1	4		-0.184414	0.388492	0.0102549	-0.113058	0.0142672	0.223491	0.27839	-0.359297
GDI2	0.871757	0.134352	-0.330917	0.795031	Color2 [DarkGray]	1	4		-0.166841	0.334494	0.2922	0.193341	-0.608216	-0.08987	0.106644	-0.0790333
ENO1	0.465015	0.342756	-0.186502	0.878734	Color2 [DarkGray]	1	4		-0.0533339	0.215382	-0.0856989	0.118737	-0.539038	0.113893	0.15706	-0.282836
CAP1	0.0422871	0.907221	-0.0502316	0.965781	Color2 [DarkGray]	1	4		0.2442	0.33362	-0.115685	0.0734795	1.26698	-0.362959	-0.111167	-0.458165
MTHFD1	0.236029	0.580725	0.138491	1.10075	Color2 [DarkGray]	1	4		0.218172	0.207285	-0.604091	-0.34512	-0.188076	0.249836	-0.204978	0.17343
TUBA1C	0.284636	0.519235	0.13312	1.09666	Color2 [DarkGray]	1	4		-0.547043	0.225695	-0.0407089	-0.102377	0.10302	0.0350694	0.222245	-0.292287
SERPINB1	0.361481	0.43503	-0.216266	0.860791	Color2 [DarkGray]	1	4		-0.268899	0.516344	0.71348	-0.23057	0.0632869	0.0477437	-0.160212	-0.085528
HSPA9	1.19426	0.0639348	0.210015	1.1567	Color2 [DarkGray]	1	4		-0.145214	-0.144612	0.0804173	-0.0811168	0.0983062	0.308617	-0.0500716	0.192684
IPO5	0.191638	0.643224	0.0876431	1.06263	Color2 [DarkGray]	1	4		-0.568416	0.058621	0.0379645	-0.0756504	-0.357262	0.0897912	0.0173387	0.0532239
KPNB1	0.056296	0.878424	-0.0229265	0.984234	Color2 [DarkGray]	1	4		-0.344308	0.199984	-0.0732292	0.263447	-0.076469	0.0846044	-0.0477773	-0.00617067
CAPN1	0.0260921	0.94169	0.0191865	1.01339	Color2 [DarkGray]	1	4		-0.286883	0.00690267	0.188273	0.188579	-0.371693	-0.0636442	0.684247	-0.0752924
ACTA1	0.409735	0.389283	-0.120237	0.920036	Color2 [DarkGray]	1	4		-0.202304	0.314566	0.084229	0.155107	-0.0731235	0.16899	-0.0564788	-0.168738
CALR	1.71709	0.0191829	-0.346337	0.786579	Color2 [DarkGray]	1	4		0.319567	0.358493	0.0106884	0.0255453	-0.156549	-0.0163547	-0.285193	-0.212955
LAMB1	0.617357	0.241348	-0.266193	0.831511	Color2 [DarkGray]	1	4		0.300389	-0.440159	0.130246	0.150656	-0.461087	0.0652697	-0.40831	-0.119511
MYO1B	0.277497	0.527841	0.220726	1.16532	Color2 [DarkGray]	1	4		-0.40115	0.61776	-0.479521	0.111483	0.80317	0.0458806	-0.0187424	-0.0988335
ACLY	0.321255	0.477249	-0.243684	0.844586	Color2 [DarkGray]	1	4		0.185915	-0.58227	-0.0105009	0.533948	-0.772727	0.192413	0.0851356	-0.352466
ESYT1	1.13128	0.0739136	-0.244713	0.843984	Color2 [DarkGray]	1	4		0.0173744	0.261984	0.277123	0.0506548	-0.0549961	-0.0705772	0.0936008	-0.339743
HBA1	0.599159	0.251676	0.90384	1.87104	Color2 [DarkGray]	1	4		-0.503288	-0.0525397	-1.14019	0.123472	1.55878	-1.09637	1.59757	-0.0171664
XPO1	0.528605	0.296071	0.234729	1.17669	Color2 [DarkGray]	1	4		-0.740778	0.0966006	-0.113908	0.0641355	0.0108516	0.20687	0.118099	-0.0908558
SND1	0.0111139	0.974734	-0.00349886	0.997578	Color2 [DarkGray]	1	4		0.044032	-0.0282604	0.0625917	-0.156724	-0.116367	0.0316196	-0.219048	0.21144
EEA1	0.475032	0.334941	-0.28062	0.823237	Color2 [DarkGray]	1	4		0.153861	-0.280127	0.360606	0.0487667	-0.648302	-0.0627987	0.377046	-0.505319
EIF4A1	0.112456	0.77187	0.0480632	1.03388	Color2 [DarkGray]	1	4		-0.419569	0.215847	-0.104258	0.09521	-0.205524	0.165494	-0.00240899	0.021921
CCT4	0.00513421	0.988248	-0.00329966	0.997715	Color2 [DarkGray]	1	4		-0.450697	0.21054	-0.023939	0.0789264	-0.446484	0.296295	0.0985357	-0.146715
SERPINH1	0.0168367	0.961974	-0.0185424	0.98723	Color2 [DarkGray]	1	4		-0.433022	0.264193	-0.353566	0.5884	-0.293012	0.612201	-0.626614	0.299259
VARS	0.0285563	0.936362	-0.0129382	0.991072	Color2 [DarkGray]	1	4		-0.0819429	0.0631204	0.33092	-0.066995	-0.0513742	-0.230248	0.13485	0.340123
PDIA4	0.0961817	0.801343	0.0708136	1.05031	Color2 [DarkGray]	1	4		-0.0672893	0.0770843	-0.501656	0.170133	0.390736	-0.545802	-0.213472	0.330065
ITGA6	0.280515	0.524186	0.223908	1.16789	Color2 [DarkGray]	1	4		0.428755	0.0978219	-0.559774	-0.357476	0.392945	0.671264	-0.385061	-0.174189
GOLGB1	0.858764	0.138432	-0.241331	0.845964	Color2 [DarkGray]	1	4		0.135664	-0.0157515	-0.00573764	0.131181	-0.52947	-0.249667	0.073116	-0.0139478
TGFBI	0.790001	0.162181	-0.765258	0.588348	Color2 [DarkGray]	1	4		1.33889	0.203071	-0.260117	0.489563	-0.498158	0.690633	-0.699118	-0.782983
ANXA2	0.443691	0.360006	-0.229542	0.852906	Color2 [DarkGray]	1	4		-0.0116658	0.0905352	0.049926	-0.121875	-0.245024	0.042075	0.152428	-0.860726
CKAP5	0.0289771	0.935455	-0.0100687	0.993045	Color2 [DarkGray]	1	4		-0.103685	0.0427849	-0.115426	0.171595	-0.299453	0.134105	0.0390223	0.0813211
HP	0.0561879	0.878642	-0.0775891	0.94764	Color2 [DarkGray]	1	4		-0.498384	1.01957	-0.54029	0.360692	0.66394	-0.570806	-0.476425	0.414522
CCT3	0.525581	0.298139	-0.170683	0.888422	Color2 [DarkGray]	1	4		-0.0898517	0.31542	0.0397149	0.144092	-0.37084	0.204803	0.0327651	-0.140087
ACLY	0.0747984	0.841786	-0.0294042	0.979825	Color2 [DarkGray]	1	4		-0.0965238	-0.0193327	0.0759486	0.382761	-0.0900142	0.303334	0.10275	-0.0908329
GART	0.0132914	0.969859	-0.00867795	0.994003	Color2 [DarkGray]	1	4		-0.535556	0.341478	0.0369887	-0.11263	-0.44406	0.0873641	0.0357054	0.0165592
TUBA4A	0.0905805	0.811745	0.0625246	1.04429	Color2 [DarkGray]	1	4		-0.402837	0.30974	-0.243528	0.14877	-0.445484	0.432691	-0.101996	0.177032
EEF1G	0.532989	0.293097	0.203628	1.15159	Color2 [DarkGray]	1	4		-0.277481	-0.241747	-0.15897	0.226079	-0.296522	0.140729	0.308959	0.209227
GSN	0.567736	0.27056	-0.244857	0.843899	Color2 [DarkGray]	1	4		0.298235	0.079308	-0.214744	0.0491915	0.262186	-0.356847	-0.537552	-0.135225
RPN2	0.18929	0.64671	0.100434	1.0721	Color2 [DarkGray]	1	4		-0.533774	0.0848483	0.0398515	0.127493	-0.0398541	-0.0472269	-0.219363	0.426598
MPO	0.216275	0.60775	-0.321343	0.800324	Color2 [DarkGray]	1	4		0.548143	-0.103429	-0.411159	0.0705264	0.937815	-0.597601	-1.68276	0.161252
PSMD1	0.42954	0.371929	0.0648799	1.046	Color2 [DarkGray]	1	4		0.00553375	0.201884	-0.082094	-0.0244607	0.0440842	0.0691288	0.0794827	0.167687
GC	0.14889	0.709758	0.225742	1.16938	Color2 [DarkGray]	1	4		0.0875284	0.500371	-0.148694	-0.0900471	1.61227	-1.00854	-0.0761824	0.724584
PARP1	0.886916	0.129743	-0.277577	0.824976	Color2 [DarkGray]	1	4		-0.162507	-0.00925849	0.39486	0.162956	-0.376696	0.0461467	-0.334692	-0.059016
SYNCRIP	0.254133	0.557015	-0.141741	0.906425	Color2 [DarkGray]	1	4		0.0199755	-0.127187	-0.0139529	0.0452264	-0.826609	0.132756	-0.0358621	0.0868134
LAMC1	0.541898	0.287145	-0.377505	0.769768	Color2 [DarkGray]	1	4		0.282402	-0.753146	0.445945	0.244838	-0.672678	0.0105532	-0.565265	-0.0625895
PLIN3	0.254863	0.556079	-0.182145	0.881392	Color2 [DarkGray]	1	4		0.0559225	-0.396766	-0.0507562	0.0716984	-1.03768	0.0536237	0.162038	-0.226461
POSTN	0.471503	0.337673	-0.591234	0.663775	Color2 [DarkGray]	1	4		0.0481293	-0.639441	1.48206	1.64904	0.00918091	0.324752	0.0623428	-0.221429
ZNF185	0.0439655	0.903721	-0.0586061	0.960191	Color2 [DarkGray]	1	4		0.187744	-0.655251	0.290076	-0.208835	-1.26112	0.344446	0.582525	-0.286542
STIP1	0.0124906	0.971649	-0.0112159	0.992256	Color2 [DarkGray]	1	4		-0.260593	0.128958	-0.164385	0.647468	-0.47465	0.403434	-0.0974815	0.475282
CNDP2	0.0274155	0.938825	-0.0314693	0.978423	Color2 [DarkGray]	1	4		-0.591958	0.702519	-0.145619	0.0991385	-0.732091	0.512944	0.371533	-0.214182
LAMC2	0.126409	0.747465	-0.223036	0.856761	Color2 [DarkGray]	1	4		0.972186	0.0119921	-0.857106	-0.0389967	0.695328	0.735246	-1.4428	-0.791843
STAT3	0.00796684	0.981823	0.00277912	1.00193	Color2 [DarkGray]	1	4		-0.0982293	-0.0713861	0.0471466	0.157749	-0.0751317	0.0783478	0.256756	-0.213575
POSTN	0.111159	0.774179	-0.170755	0.888377	Color2 [DarkGray]	1	4		-0.33669	-0.998685	1.27964	0.993379	0.541291	0.107974	-0.227481	-0.167158
CCT8	0.565622	0.27188	-0.186617	0.878664	Color2 [DarkGray]	1	4		0.0481369	0.14258	-0.0548984	0.0651106	-0.510421	0.139691	0.0623349	-0.237144
STAT3	0.177757	0.664115	-0.0959389	0.935663	Color2 [DarkGray]	1	4		-0.109784	0.429383	-0.0222827	0.326185	-0.158668	0.0170529	0.537207	-0.155846
POSTN	0	1	NaN	#VALUE!	Color2 [DarkGray]	1	4		NaN	NaN	NaN	NaN	NaN	NaN	NaN	NaN
HSPA4L	0.221223	0.600865	0.239979	1.18098	Color2 [DarkGray]	1	4		0.0448407	-0.669313	-0.0392115	0.191589	-0.624362	0.546088	1.00639	-0.440294
ITIH4	0.248303	0.564543	0.422456	1.34021	Color2 [DarkGray]	1	4		-0.356067	0.941307	-0.177534	0.125438	2.21669	-0.555656	-0.28069	0.842626
SFN	0.0641377	0.862705	0.0620234	1.04393	Color2 [DarkGray]	1	4		-0.0679488	-0.0499533	-0.147114	0.0884782	-0.90958	0.325749	0.674985	-0.0195988
MYO18A	1.6291	0.0234907	-0.247491	0.84236	Color2 [DarkGray]	1	4		0.150944	0.22225	0.0277368	0.0663553	-0.293611	-0.164529	0.0416653	-0.106204
TYMP	0.0665854	0.857856	-0.0970117	0.934968	Color2 [DarkGray]	1	4		0.0992923	1.25806	-0.458533	-0.291113	-0.734859	0.930094	0.15802	-0.133597
EHD1	0.0533675	0.884367	0.0488984	1.03447	Color2 [DarkGray]	1	4		-0.0376977	0.0502967	-0.541635	0.0664067	0.634597	-0.213661	-0.750658	0.0626868
SERPINC1	0.123171	0.753058	0.270122	1.20591	Color2 [DarkGray]	1	4		-0.563104	0.390161	0.106471	-0.153332	2.26143	-1.4586	-0.48103	0.538884
HSPA2	0.00390712	0.991044	0.00394833	1.00274	Color2 [DarkGray]	1	4		0.717498	-0.453261	-0.219514	0.177007	-0.382118	0.188931	-0.18378	0.61449
PPP2R1A	0.139483	0.725299	-0.0674898	0.954297	Color2 [DarkGray]	1	4		-0.231047	0.0588027	-0.0833043	0.112654	-0.451833	0.0900195	0.2579	-0.30894
KRT2	0.173883	0.670065	0.129098	1.09361	Color2 [DarkGray]	1	4		0.748829	-0.38025	-0.0630533	-0.215389	0.154612	-0.191195	0.136164	0.506946
PGAM1	0.288538	0.514591	-0.230999	0.852045	Color2 [DarkGray]	1	4		-0.129876	0.0276212	-0.0498639	0.347284	-0.761365	0.447212	0.278294	-0.692972
ALDOA	0.36373	0.432783	-0.17443	0.886118	Color2 [DarkGray]	1	4		0.0358289	0.23486	-0.0299556	0.00588304	-0.615891	0.312296	0.0634887	-0.210997
CAD	0.518281	0.303193	0.159861	1.11718	Color2 [DarkGray]	1	4		-0.156146	0.0729188	0.0348035	-0.0722505	0.400115	-0.179462	0.00773171	0.290386
TUFM	0.874509	0.133503	0.214202	1.16006	Color2 [DarkGray]	1	4		-0.0938905	-0.0140322	0.213943	-0.112373	0.323293	0.0176801	0.0789699	0.430513
NAMPT	0.14421	0.717447	0.101666	1.07301	Color2 [DarkGray]	1	4		-0.73508	0.200057	0.342703	-0.141053	0.343792	-0.185326	-0.134428	0.0492553
LMNB1	0.998559	0.100332	-0.263317	0.83317	Color2 [DarkGray]	1	4		0.322832	-0.0639335	0.328547	-0.0254608	-0.307035	0.0736541	-0.200851	-0.057052
NDRG1	0.103658	0.787667	-0.0922758	0.938042	Color2 [DarkGray]	1	4		-0.472973	0.157748	-0.210489	0.714051	-0.0837404	0.301431	0.203879	-0.602336
SEC31A	0.0677318	0.855595	-0.032393	0.977797	Color2 [DarkGray]	1	4		-0.410742	-0.0159138	0.0871023	0.143677	-0.417602	0.064404	0.0804212	-0.0526729
GBP1	0.275137	0.530717	-0.505306	0.704511	Color2 [DarkGray]	1	4		0.248339	2.2853	-0.81295	0.00805344	0.0110042	0.962494	-0.527244	-0.738742
POSTN	0.645532	0.226187	-0.711653	0.61062	Color2 [DarkGray]	1	4		0.389267	-0.880862	0.950919	1.37209	-0.430825	0.300908	-0.275031	-0.610256
HNRNPM	0.573395	0.267058	-0.203786	0.868269	Color2 [DarkGray]	1	4		0.00539788	0.0657846	0.191224	-0.04028	-0.585929	0.168739	-0.129441	-0.0463861
CCT5	0.227365	0.592427	-0.0802141	0.945917	Color2 [DarkGray]	1	4		-0.222299	0.187377	0.00477561	0.143852	-0.257624	0.251391	-0.118711	-0.0822074
UGGT1	0.138564	0.726835	0.0466553	1.03287	Color2 [DarkGray]	1	4		-0.000281219	-0.0205431	0.158568	-0.121321	0.244774	0.0240927	-0.259063	0.19324
MYO1C	0.0537885	0.88351	-0.0338051	0.976841	Color2 [DarkGray]	1	4		-0.383542	-0.106611	0.229913	0.224174	-0.46182	-0.00689775	0.342764	-0.0453328
DNAJC13	0.191088	0.644039	0.0907243	1.0649	Color2 [DarkGray]	1	4		-0.181678	0.150808	-0.0192375	-0.0164289	0.481615	-0.357915	0.0175713	0.15509
UBA6	0.0336372	0.925471	-0.0307183	0.978933	Color2 [DarkGray]	1	4		-0.227536	0.998225	-0.299904	0.079014	0.0323432	0.385273	0.097554	-0.0882439
ITGA6	0.256976	0.55338	0.14555	1.10615	Color2 [DarkGray]	1	4		0.0419545	0.209796	-0.0362344	-0.158235	0.741914	-0.017028	-0.289636	0.204231
ECPAS	0.0560276	0.878967	-0.0185046	0.987255	Color2 [DarkGray]	1	4		-0.178596	0.183375	-0.0748416	0.0740559	-0.120319	0.0672751	0.176211	-0.193192
COPB2	0.405132	0.393431	-0.0584376	0.960304	Color2 [DarkGray]	1	4		-0.0831904	0.0947715	-0.00128718	-0.00364634	-0.096369	0.092892	-0.147626	-0.076
DNM1L	0.583509	0.26091	0.139286	1.10136	Color2 [DarkGray]	1	4		-0.20583	0.0450994	-0.0974146	0.164237	-0.0476267	0.166279	0.0365377	0.308046
DCTN1	0.878494	0.132284	-0.209245	0.86499	Color2 [DarkGray]	1	4		0.440499	0.00925354	0.0256006	0.080671	-0.0477369	-0.0699106	0.0741117	-0.237421
SYNCRIP	0	1	NaN	#VALUE!	Color2 [DarkGray]	1	4		NaN	NaN	NaN	NaN	NaN	NaN	NaN	NaN
SERPINB4	0.125594	0.74887	-0.228722	0.85339	Color2 [DarkGray]	1	4		-0.893134	-0.160519	0.69125	0.118838	-0.947657	0.201521	1.13507	-1.54739
FAM129B	0.0339156	0.924878	0.034187	1.02398	Color2 [DarkGray]	1	4		-0.775572	0.061757	0.026985	-0.063908	-0.839278	0.0794653	0.493869	-0.348046
IARS	0.0254185	0.943152	-0.00954583	0.993405	Color2 [DarkGray]	1	4		-0.237082	-0.0247213	0.225977	0.257464	-0.0813317	-0.00262495	0.102283	0.165129
CYFIP1	0.0317798	0.929438	-0.0184977	0.98726	Color2 [DarkGray]	1	4		-0.355067	0.264926	0.0706742	0.0478704	-0.154351	-0.0618105	0.42922	-0.258645
SCEL	0.0912023	0.810583	-0.151971	0.90002	Color2 [DarkGray]	1	4		0.452319	-0.199457	1.08522	0.0265454	-0.723891	-0.153421	1.74469	-0.110627
EIF5B	0.270729	0.536131	-0.109499	0.92691	Color2 [DarkGray]	1	4		0.020597	-0.156528	0.0914682	-0.0199167	-0.600796	0.0521471	0.0242714	0.0220013
DIAPH1	0.0477292	0.895923	0.0201252	1.01405	Color2 [DarkGray]	1	4		0.141091	-0.0175894	-0.044839	0.0714781	-0.0791067	0.021191	0.463869	-0.175312
RPL3	0.34705	0.449729	-0.125141	0.916914	Color2 [DarkGray]	1	4		0.0418635	-0.0272566	0.0825612	-0.0489642	-0.548203	0.0769081	0.111898	-0.0929638
EFTUD2	0.0799241	0.831909	0.0208281	1.01454	Color2 [DarkGray]	1	4		-0.260094	0.0884494	0.00520597	-0.0411523	-0.0142382	0.0428774	-0.198183	0.0452649
SCEL	0.152646	0.703646	-0.173165	0.886895	Color2 [DarkGray]	1	4		0.505899	-0.370155	0.608169	0.146832	-0.4996	-0.20374	1.15274	-0.251313
ZNF185	0.111701	0.773213	0.202647	1.15081	Color2 [DarkGray]	1	4		0.175559	-1.09329	0.60544	-0.193401	-1.30639	0.673239	1.26856	-0.330513
ATIC	0.269002	0.538267	0.117043	1.08451	Color2 [DarkGray]	1	4		-0.335149	0.263223	0.09264	-0.2873	-0.19911	-0.00522707	0.104835	0.301087
TRIM29	0.0773247	0.836903	-0.106203	0.92903	Color2 [DarkGray]	1	4		0.0798124	-0.534306	-0.0206323	-0.0150431	-1.49108	0.177198	0.73383	-0.334923
HSD17B4	0.251773	0.560051	0.0867664	1.06199	Color2 [DarkGray]	1	4		-0.381928	-0.0531591	0.0302558	0.243101	-0.0124358	-0.0688696	0.174937	0.0917043
CAP1	0.238143	0.577906	0.193687	1.14368	Color2 [DarkGray]	1	4		-0.285805	0.213094	0.00316239	0.214034	1.14099	-0.00859277	-0.00544465	-0.207717
AP2B1	0.88192	0.131244	-0.218686	0.859348	Color2 [DarkGray]	1	4		-0.00113261	0.000583419	0.212933	0.477488	-0.0855596	0.106661	-0.13709	-0.0688843
DSC2	0.0462479	0.898984	0.0696463	1.04946	Color2 [DarkGray]	1	4		-0.619878	-0.302283	0.0405827	0.0245261	-1.56811	0.41597	0.682145	-0.108473
SERPINB3	0.103214	0.788472	0.234353	1.17638	Color2 [DarkGray]	1	4		-0.909698	-0.270442	0.208047	0.428711	-0.861427	0.407037	2.16921	-1.32079
IFI16	0.407495	0.391296	-0.214764	0.861687	Color2 [DarkGray]	1	4		-0.349304	0.238648	0.0522393	0.139286	-0.625216	0.299685	-0.319962	-0.132695
CAT	0.556706	0.27752	0.377324	1.29893	Color2 [DarkGray]	1	4		0.0119467	-0.0578619	-0.287275	-0.011325	0.983191	-0.518333	0.330955	0.368966
FKBP4	0.18711	0.649965	-0.138243	0.908625	Color2 [DarkGray]	1	4		-0.0672658	0.0770634	-0.125823	0.215574	-0.88701	0.428357	-0.0896567	0.0948878
IMMT	0.448628	0.355936	-0.198091	0.871703	Color2 [DarkGray]	1	4		-0.0825721	-0.139825	0.246936	0.339198	-0.524786	0.216466	-0.155097	0.0347914
ATP5F1A	0.0938222	0.805708	-0.0252532	0.982648	Color2 [DarkGray]	1	4		-0.020514	0.0342509	0.290182	-0.0961984	0.136336	-0.0988524	-0.00792536	0.0771497
APOA1	0.441556	0.361779	0.553662	1.46781	Color2 [DarkGray]	1	4		-0.131319	0.185104	-0.405746	-0.470971	1.78356	-0.823678	0.355919	0.0759119
SLC3A2	0.563243	0.273374	0.393722	1.31378	Color2 [DarkGray]	1	4		-0.422146	-0.694396	-0.226551	0.224659	0.224475	0.217433	-0.619146	0.63369
HNRNPU	0.553098	0.279835	-0.205577	0.867192	Color2 [DarkGray]	1	4		-0.146001	-0.0119673	0.00772846	0.0663655	-0.617984	0.137722	-0.369599	-0.0563234
SLK	0.280322	0.524418	-0.152417	0.899742	Color2 [DarkGray]	1	4		0.338558	0.350947	-0.157741	-0.0340307	-0.231084	0.0233667	0.468204	-0.37242
IMMT	0.68111	0.208396	-0.198065	0.871719	Color2 [DarkGray]	1	4		0.0333069	-0.143041	0.0154476	0.00365516	-0.292564	-0.00226946	-0.571163	-0.0168938
LIMA1	0.240104	0.575302	-0.218028	0.85974	Color2 [DarkGray]	1	4		0.462829	0.216121	-0.430342	-0.00589288	-0.931237	0.557975	0.0750498	-0.331183
LIMA1	0.1018	0.791044	-0.154536	0.898421	Color2 [DarkGray]	1	4		0.42589	-0.0932199	-0.817375	0.0615057	-1.37971	0.439333	0.686383	-0.787347
DPYSL2	0.408036	0.390808	-0.264199	0.832661	Color2 [DarkGray]	1	4		0.0287323	-0.345106	0.579073	0.142287	-0.800384	0.00236815	0.0680323	0.0781739
TPI1	0.0317006	0.929607	0.0236562	1.01653	Color2 [DarkGray]	1	4		-0.355693	-0.0529272	0.0300383	0.0609736	-0.727223	0.400944	0.0409789	0.0623166
COL6A2	0.276536	0.529011	-0.313379	0.804755	Color2 [DarkGray]	1	4		0.596915	-1.15424	0.600425	0.106943	-0.718985	-0.12984	0.275635	-0.530279
SLK	0.359383	0.437136	-0.293895	0.815697	Color2 [DarkGray]	1	4		0.247217	-0.140465	-0.102793	0.0834474	-0.937683	0.444723	0.172423	-0.767635
EGFR	0.2116	0.614327	0.263665	1.20053	Color2 [DarkGray]	1	4		-0.0440004	-0.26024	-0.168767	0.960952	1.56914	0.0723229	0.191866	-0.290719
ATP6V1A	0.244146	0.569973	-0.0710607	0.951938	Color2 [DarkGray]	1	4		-0.184789	0.240238	-0.015679	0.0770651	0.0864516	-0.224028	0.0903286	-0.120161
DDX1	0.0902848	0.812298	-0.00889266	0.993855	Color2 [DarkGray]	1	4		0.0349318	-0.0292272	-0.0290402	0.100204	-0.0135667	0.0523219	-0.0254798	0.0280226
CCT7	0.239085	0.576653	-0.0699105	0.952697	Color2 [DarkGray]	1	4		-0.119329	0.0824031	0.0860734	0.00449892	-0.205357	0.185013	0.064367	-0.270019
NCL	0.121339	0.756243	-0.108874	0.927311	Color2 [DarkGray]	1	4		-0.21662	-0.0254201	0.181117	-0.00160127	-1.06534	0.387502	-0.029144	0.208961
HNRNPU	0.383797	0.41324	-0.353718	0.782565	Color2 [DarkGray]	1	4		1.16864	-0.189394	0.572988	-0.322266	-0.54722	0.0753368	0.417455	-0.130477
CHD4	0.149058	0.709483	-0.0485157	0.966931	Color2 [DarkGray]	1	4		0.133486	-0.0469489	0.024406	0.0293406	-0.217857	-0.14214	-0.0121301	0.318348
LARS	0.367087	0.42945	0.238143	1.17947	Color2 [DarkGray]	1	4		-0.867046	-0.0212385	0.121194	-0.250674	-0.54403	0.156819	0.104619	0.2174
SF3B3	0.593737	0.254837	0.0919851	1.06584	Color2 [DarkGray]	1	4		-0.185482	0.00993452	-0.031546	-0.0876614	0.0685526	0.0870445	-0.160106	0.0776947
DSC3	0.374909	0.421785	0.339114	1.26498	Color2 [DarkGray]	1	4		-0.265452	-0.285147	0.174165	-0.23847	-0.855972	0.229029	0.937817	0.43068
CANX	0.0240458	0.946137	-0.0102436	0.992925	Color2 [DarkGray]	1	4		0.0141388	0.0727448	0.0855201	-0.270375	0.279991	0.0169674	-0.244852	-0.191052
C6	0.442124	0.361306	0.947308	1.92827	Color2 [DarkGray]	1	4		0.0980276	0.891822	-0.340239	-0.101672	3.47863	-0.432375	-0.291999	1.58291
AARS	0.50963	0.309293	0.177582	1.13099	Color2 [DarkGray]	1	4		-0.0695558	-0.0134615	-0.068085	0.144378	-0.111563	0.0171153	0.213349	0.584703
HBB	0.490514	0.323211	0.745204	1.67621	Color2 [DarkGray]	1	4		-0.151418	-0.152765	-0.922862	0.112481	1.70236	-1.21403	1.28207	0.0958588
MATR3	0.23498	0.58213	-0.126628	0.91597	Color2 [DarkGray]	1	4		-0.0209342	-0.143062	0.156369	0.138561	-0.670217	0.267518	0.120987	-0.0938672
FSCN1	0.129708	0.741809	-0.0752433	0.949182	Color2 [DarkGray]	1	4		0.0587411	0.552622	-0.400157	-0.0740812	0.0732232	0.133066	-0.274274	-0.0958636
SAMHD1	0.636676	0.230847	-0.471052	0.721438	Color2 [DarkGray]	1	4		0.0803709	1.13523	0.268803	-0.0973357	-0.403879	0.507664	-0.477203	-0.123721
ITGAM	0.19593	0.636898	0.313981	1.24313	Color2 [DarkGray]	1	4		0.664317	-0.267851	-0.236012	0.170993	1.74471	-0.273305	-0.870469	0.986436
PGD	0.887566	0.129549	-0.404763	0.75536	Color2 [DarkGray]	1	4		0.286471	-0.154529	0.745346	0.13291	-0.0517151	-0.325326	0.176155	-0.407969
ILF3	0.258725	0.551156	-0.191903	0.87545	Color2 [DarkGray]	1	4		-0.0331174	-0.332383	0.0990553	0.0318282	-1.10209	0.15105	-0.105627	0.0544342
TACC2	0.154927	0.69996	-0.103671	0.930662	Color2 [DarkGray]	1	4		0.15294	-0.49852	-0.026012	0.175769	-0.420552	0.0207362	0.335413	-0.546105
PABPC1	0.0135726	0.969231	0.0112191	1.00781	Color2 [DarkGray]	1	4		-0.119544	-0.169848	-0.0707882	0.0330675	-0.873249	0.34577	0.22127	0.0239717
LTA4H	0.836095	0.145849	-0.166099	0.89125	Color2 [DarkGray]	1	4		-0.0225937	0.167985	0.0320314	0.198681	0.00167397	-0.31722	0.0612771	-0.0340215
SERBP1	0.0437374	0.904196	0.0455054	1.03204	Color2 [DarkGray]	1	4		-0.0178409	-0.44997	0.0735923	-0.0538935	-1.0482	0.453788	0.357678	-0.029358
GPI	0.362244	0.434266	-0.145052	0.904347	Color2 [DarkGray]	1	4		-0.0945661	0.22301	-0.0999827	0.0719755	-0.378023	0.0900761	0.201197	-0.393021
RDX	0.0119339	0.972895	0.00765299	1.00532	Color2 [DarkGray]	1	4		-0.46624	0.0961735	-0.0251437	0.130564	-0.485781	0.287757	0.0997249	-0.135736
USO1	0.163313	0.686574	-0.0603432	0.959036	Color2 [DarkGray]	1	4		-0.0463347	0.126817	0.0192578	-0.019044	-0.427862	-0.023917	0.0883491	0.202754
DDX3X	0.0394903	0.913082	0.0161048	1.01123	Color2 [DarkGray]	1	4		-0.0834417	0.10746	-0.0296249	-0.0273274	-0.349036	0.198316	0.237406	-0.0552006
KRT19	0.0522795	0.886585	0.11314	1.08158	Color2 [DarkGray]	1	4		0.0714966	0.175129	1.25861	-0.114377	2.53463	-0.0421747	-0.303632	-0.3454
RARS	0.0966707	0.800441	0.040603	1.02854	Color2 [DarkGray]	1	4		-0.248475	0.113717	0.00113756	-0.0369784	-0.393255	0.208643	0.0675348	0.108889
CRYBG2	0.161799	0.688971	-0.0819317	0.944792	Color2 [DarkGray]	1	4		0.146952	-0.211876	0.0371463	0.130519	-0.0177477	-0.0443088	0.349266	-0.512195
CTTN	0.585806	0.259534	-0.296294	0.814342	Color2 [DarkGray]	1	4		0.138634	0.177814	-0.194848	0.0311287	-0.869715	-0.0435833	0.16036	-0.279508
CSPG4	0.501428	0.31519	-0.370366	0.773586	Color2 [DarkGray]	1	4		0.22181	0.306877	-0.801086	0.386559	-0.531365	0.0441673	-0.783073	-0.0970339
PSMC4	0.415366	0.384268	0.116913	1.08441	Color2 [DarkGray]	1	4		-0.301213	0.211977	-0.0286964	-0.147538	-0.124959	0.159483	0.10322	0.0644375
PC	0.335232	0.462135	-0.282148	0.822366	Color2 [DarkGray]	1	4		0.832383	0.185731	-0.179277	0.126844	0.783052	-0.290928	-0.103064	-0.551969
EIF4A3	0.285055	0.518734	-0.0969685	0.934996	Color2 [DarkGray]	1	4		-0.196596	0.275143	-0.012665	-0.00722914	0.0376383	0.0804997	-0.374811	-0.0725485
PFKL	0.0847456	0.822724	0.0354986	1.02491	Color2 [DarkGray]	1	4		-0.306133	0.302601	-0.023946	-0.10266	0.128481	0.0186979	0.102482	-0.237804
EHD2	0.0159808	0.963872	0.0107431	1.00747	Color2 [DarkGray]	1	4		-0.10082	-0.512234	0.283383	0.376867	-0.212417	0.2749	0.0763454	-0.048661
PFKP	1.09378	0.0805787	-0.470034	0.721948	Color2 [DarkGray]	1	4		0.011082	0.681922	0.0386943	0.450673	0.0501605	-0.149465	0.0163946	-0.614854
CAPNS1	0.240283	0.575065	-0.138522	0.908449	Color2 [DarkGray]	1	4		-0.559574	0.155872	0.239222	0.0957189	-0.514738	-0.127663	0.19487	-0.175318
MYH14	1.36001	0.0436504	-0.661166	0.632367	Color2 [DarkGray]	1	4		0.109233	0.173659	0.714633	-0.114278	-0.744914	0.107837	-0.476508	-0.647833
F13A1	0.30165	0.499287	0.403237	1.32247	Color2 [DarkGray]	1	4		-0.263885	-0.801939	1.10496	0.104572	0.673919	-0.163325	1.44501	-0.198948
PSMC1	0.158892	0.693598	0.0629929	1.04463	Color2 [DarkGray]	1	4		0.108216	0.0765622	-0.0610134	-0.332847	-0.221898	0.267738	0.134251	-0.1372
AP2A1	0.152895	0.703242	-0.0369053	0.974744	Color2 [DarkGray]	1	4		-0.104468	-0.0405043	0.174381	0.129447	-0.10693	0.0331126	0.170578	-0.085526
THBS1	0.495088	0.319825	-0.42393	0.745391	Color2 [DarkGray]	1	4		0.692123	0.0145123	-0.708304	0.633704	0.106677	-0.0111267	-0.305087	-0.854151
ATL3	0.0880137	0.816557	0.0647352	1.04589	Color2 [DarkGray]	1	4		-0.773024	-0.153585	0.118499	0.116249	-0.504077	-0.241794	0.234771	0.0781808
LMO7	0.0830209	0.825998	0.0704364	1.05003	Color2 [DarkGray]	1	4		0.0722985	0.523907	-0.0681528	-0.315666	-0.237593	-0.365376	0.661466	0.435635
ANXA5	0.0398449	0.912337	0.0297311	1.02082	Color2 [DarkGray]	1	4		-0.67558	0.0163176	-0.0381042	0.0138696	0.304648	0.0707049	-0.510279	-0.429646
TAGLN2	0.680603	0.20864	-0.439269	0.737508	Color2 [DarkGray]	1	4		0.108325	0.183767	-0.275989	0.305323	-1.0762	0.19027	-0.00294425	-0.546769
PTBP1	0.114071	0.769005	0.0832453	1.0594	Color2 [DarkGray]	1	4		-0.474639	-0.0188485	0.0522133	-0.00803068	-0.709786	0.411195	0.000168533	0.182099
HELZ2	0.0984644	0.797142	0.0955644	1.06848	Color2 [DarkGray]	1	4		-0.221294	0.811237	-0.487298	-0.146239	0.155788	0.557368	-0.483698	0.109206
C7	0.413363	0.386044	0.912917	1.88285	Color2 [DarkGray]	1	4		0.160513	0.66703	-0.544065	-0.174742	3.41883	-0.770277	-0.247091	1.35894
HSPB1	0.0913125	0.810378	0.121813	1.0881	Color2 [DarkGray]	1	4		-0.0423791	-0.309242	0.0457205	0.695508	-0.625364	0.664202	1.22388	-0.385862
DDX21	0.695604	0.201556	-0.247457	0.84238	Color2 [DarkGray]	1	4		0.318263	-0.0716495	0.0473877	0.0477059	-0.480197	0.245346	-0.253561	-0.159707
BASP1	0.221004	0.601168	-0.245032	0.843797	Color2 [DarkGray]	1	4		0.661383	-0.634472	0.0755996	0.507739	0.797752	-0.0868891	-0.826836	-0.253903
LAMA5	0.157721	0.69547	-0.108558	0.927515	Color2 [DarkGray]	1	4		0.386804	-0.630224	0.422725	-0.0165734	-0.0921011	0.00602451	-0.328793	0.143368
OGDH	0.0777775	0.836031	-0.0199367	0.986276	Color2 [DarkGray]	1	4		-0.00879529	-0.12278	0.138521	0.126618	-0.0206423	0.0393256	-0.147221	0.182353
SMC3	0.00829238	0.981087	-0.00322843	0.997765	Color2 [DarkGray]	1	4		0.0771324	-0.18882	-0.0294102	-0.00638408	-0.188577	0.0869841	-0.283703	0.2249
HK1	1.67826	0.0209769	-0.23652	0.84879	Color2 [DarkGray]	1	4		0.110535	0.0391518	0.205544	0.199061	-0.00676677	-0.0412899	-0.0527973	-0.290933
NCKAP1	0.303339	0.497349	-0.126173	0.916259	Color2 [DarkGray]	1	4		-0.00669385	0.0210735	0.0749008	0.117164	-0.255261	-0.090047	0.414026	-0.366966
YWHAQ	0.498787	0.317112	-0.30245	0.810874	Color2 [DarkGray]	1	4		-0.0457353	0.130229	-0.0397235	0.00365739	-0.918997	0.182552	0.155715	-0.580642
ACADVL	0.295745	0.506122	-0.117378	0.921862	Color2 [DarkGray]	1	4		-0.337345	0.237868	0.328163	0.00602828	-0.00882626	-0.25368	0.101757	-0.0740484
TJP1	0.380887	0.416019	-0.195293	0.873395	Color2 [DarkGray]	1	4		0.0281482	0.194335	-0.0221583	0.172561	-0.666766	-0.0185949	0.387785	-0.110712
GDI1	0.0448485	0.901886	-0.0294227	0.979812	Color2 [DarkGray]	1	4		-0.229765	0.219254	-0.0198993	0.292186	-0.355093	0.578034	-0.0215872	-0.0572686
DDX60	0.255839	0.554831	-0.289212	0.818349	Color2 [DarkGray]	1	4		0.0858569	0.861754	-0.240909	0.569262	-0.0275805	1.15508	-0.467948	-0.540437
USP9X	0.188231	0.648289	0.043697	1.03075	Color2 [DarkGray]	1	4		-0.121009	0.138822	-0.026415	-0.0971801	0.115282	-0.145268	0.149815	-0.0508246
AKR1B10	0.249784	0.562621	-0.293458	0.815944	Color2 [DarkGray]	1	4		-0.0699037	0.542538	0.112426	-0.0433242	-1.35782	0.0324305	0.860523	-0.167235
ALDH2	0.653568	0.222041	-0.330721	0.795139	Color2 [DarkGray]	1	4		0.0574046	-0.175627	0.375058	0.59961	-0.461676	-0.0271975	0.324727	-0.302289
HNRNPA2B1	0.529353	0.295561	-0.308701	0.807369	Color2 [DarkGray]	1	4		-0.163728	-0.0802028	0.17548	0.290147	-0.909999	0.224925	-0.336362	0.00832996
ITIH2	0.104538	0.786072	0.268161	1.20427	Color2 [DarkGray]	1	4		0.298015	0.70177	-0.358036	-0.658615	2.70659	-1.40048	-0.638951	0.388614
YWHAE	0.0295896	0.934137	-0.0103348	0.992862	Color2 [DarkGray]	1	4		-0.283794	0.0712931	-0.0113376	0.171077	-0.105429	0.00613275	0.159677	-0.154482
KRT8	0.152293	0.704218	-0.31855	0.801875	Color2 [DarkGray]	1	4		0.573405	0.658956	-0.684595	-1.01664	0.96621	0.465452	-1.72249	-1.45225
HNRNPR	0.0449305	0.901715	0.0220068	1.01537	Color2 [DarkGray]	1	4		-0.464646	0.0184243	0.0978669	-0.00464507	-0.338179	0.219199	-0.0679654	-0.0780269
QARS	0.743559	0.180485	0.209997	1.15669	Color2 [DarkGray]	1	4		-0.41178	0.0502217	-0.015809	-0.146422	0.0407864	-0.155562	0.291502	0.139472
PARP14	0.083227	0.825606	0.0729266	1.05185	Color2 [DarkGray]	1	4		-0.320659	0.705399	-0.291337	0.0555386	0.0884447	0.702334	-0.238149	-0.111982
HNRNPUL2	0.278511	0.526609	0.16722	1.12289	Color2 [DarkGray]	1	4		-0.592181	-0.0912776	0.328191	0.0381531	-0.308778	0.183288	0.0286674	0.448588
NOMO2	0.556089	0.277914	0.217324	1.16257	Color2 [DarkGray]	1	4		-0.50211	0.281451	-0.033702	-0.245867	0.0584442	0.297034	-0.0645992	0.0781883
C4BPA	0.157277	0.696182	0.424462	1.34207	Color2 [DarkGray]	1	4		0.360969	0.477875	-0.765161	-0.465806	2.98029	-1.15161	-1.2187	0.695737
ITPR3	0.830971	0.147581	-0.225526	0.855283	Color2 [DarkGray]	1	4		0.054788	0.496857	-0.113304	0.314645	-0.0469653	-0.0102581	-0.0498368	-0.0420572
MX2	0.0673848	0.856279	-0.149536	0.901541	Color2 [DarkGray]	1	4		-0.134302	1.47287	0.109367	0.0589823	-0.0439835	2.25765	-0.399357	-0.905534
ACTR3	0.358905	0.437618	-0.076273	0.948505	Color2 [DarkGray]	1	4		0.00918929	0.281681	-0.0661165	0.0462131	-0.0117844	0.0261643	0.101697	-0.150202
YWHAZ	0.0363956	0.919611	-0.0350382	0.976006	Color2 [DarkGray]	1	4		-0.227154	0.0971374	-0.543219	-0.00538458	-1.10011	0.20197	0.074531	0.00483252
RPN1	0.0504497	0.890329	-0.0157283	0.989157	Color2 [DarkGray]	1	4		0.052038	-0.020619	-0.036101	-0.00629288	0.195902	-0.110205	-0.27616	0.116575
CCT6A	0.017151	0.961278	-0.00579311	0.995993	Color2 [DarkGray]	1	4		-0.172037	0.06899	-0.00319812	0.0452914	-0.197868	0.215045	0.0777482	-0.179052
CALD1	0.655429	0.221091	-0.521537	0.696629	Color2 [DarkGray]	1	4		0.511337	-0.7299	0.269521	0.386338	-0.957271	0.260613	-0.586647	-0.365548
AP2A2	0.17188	0.673162	0.0927808	1.06642	Color2 [DarkGray]	1	4		-0.579528	0.00988772	-0.0314979	0.0862472	-0.438632	-0.0408552	0.203669	0.132051
UPF1	0.31136	0.488248	0.103976	1.07473	Color2 [DarkGray]	1	4		-0.324386	0.264834	-0.0609218	-0.104805	0.084492	0.0924604	-0.157473	0.171145
CAPN2	0.649918	0.223914	-0.260705	0.83468	Color2 [DarkGray]	1	4		-0.0829184	0.200964	0.202088	0.0263061	-0.199527	-0.0384138	0.194844	-0.653282
PSMC3	0.0421906	0.907422	0.00957944	1.00666	Color2 [DarkGray]	1	4		0.149602	0.04148	-0.13211	-0.0698854	-0.12926	0.10194	0.0230795	0.031644
TJP2	0.230916	0.587603	-0.171132	0.888146	Color2 [DarkGray]	1	4		-0.128784	0.399402	-0.473816	0.256432	-0.801733	0.0478237	0.223496	-0.10088
NOMO1	0.433448	0.368597	-0.294682	0.815252	Color2 [DarkGray]	1	4		0.616066	0.0358666	0.186249	-0.348591	-0.654315	-0.353865	0.424447	-0.105403
DDX17	0.598131	0.252272	-0.118156	0.921365	Color2 [DarkGray]	1	4		0.193994	-0.0174697	-0.00404381	0.0925451	-0.0896289	-0.107648	-0.187616	0.177294
LAD1	0.121353	0.756218	-0.159713	0.895203	Color2 [DarkGray]	1	4		0.190744	-0.469264	-0.207337	0.161658	-1.50641	0.609408	0.273282	-0.339327
DES	0.492802	0.321512	0.753419	1.68578	Color2 [DarkGray]	1	4		0.0877925	-1.12504	0.473541	-0.0903373	-0.271101	2.0117	-0.56165	1.18068
HK2	0.163086	0.686933	-0.0809295	0.945448	Color2 [DarkGray]	1	4		-0.221968	0.439785	-0.117009	0.0746352	-0.316139	0.13742	0.2035	-0.173057
MYH2	0.520174	0.301874	0.727455	1.65572	Color2 [DarkGray]	1	4		-0.0550791	-0.326715	1.15971	-0.0940753	0.110139	2.14673	-0.152245	1.48904
ACTN2	0.495665	0.3194	0.430332	1.34754	Color2 [DarkGray]	1	4		-0.0792988	-0.305759	0.5907	-0.278829	0.134067	1.31387	-0.271284	0.471487
NOP56	0.430023	0.371515	0.190101	1.14084	Color2 [DarkGray]	1	4		0.391867	-0.167068	-0.0710426	-0.225493	-0.177315	0.492677	0.143608	0.229697
DPYSL3	0.0765314	0.838434	-0.0716702	0.951536	Color2 [DarkGray]	1	4		0.0411551	-0.750784	0.193474	-0.0407552	-0.570979	0.283528	0.195998	-0.752139
HADHB	0.802199	0.157689	-0.163257	0.893007	Color2 [DarkGray]	1	4		-0.0156485	0.124372	0.254861	0.0446863	0.0469796	-0.0937511	0.0829267	-0.280911
G6PD	0.973341	0.106331	0.221743	1.16614	Color2 [DarkGray]	1	4		-0.0142419	-0.356045	-0.200285	0.0869208	0.287426	0.0445334	0.0133535	0.0580077
GPD2	0.384089	0.412963	0.122246	1.08843	Color2 [DarkGray]	1	4		-0.14468	0.0371525	0.119333	-0.0652705	0.391302	-0.195821	0.0228519	0.217186
BICD2	0.423041	0.377537	-0.300604	0.811913	Color2 [DarkGray]	1	4		0.201057	0.0224664	-0.204174	0.477201	-0.877204	-0.0193611	0.471225	-0.280524
NUP205	0.213814	0.611204	0.0739516	1.0526	Color2 [DarkGray]	1	4		0.0272275	0.103687	-0.146432	-0.0265726	0.444808	-0.091147	-0.0577895	-0.0421556
LMNB2	1.10667	0.0782222	-0.350158	0.784498	Color2 [DarkGray]	1	4		0.11814	0.0381646	0.21717	0.00385723	-0.720611	-0.0148137	-0.166829	-0.121047
IPO7	0.249412	0.563104	0.119607	1.08644	Color2 [DarkGray]	1	4		-0.52554	0.104747	-0.236228	-0.0388732	-0.452269	0.168666	0.109988	-0.0438537
PPA1	0.618768	0.240565	-0.360393	0.778952	Color2 [DarkGray]	1	4		-0.217971	0.529897	0.140762	0.248264	-0.59512	0.4203	-0.0850282	-0.480773
HNRNPR	1.10624	0.0782993	0.646401	1.56526	Color2 [DarkGray]	1	4		-1.08234	-0.0750241	-0.0233669	-0.0926907	0.0482979	0.145826	0.800663	0.317396
PSMC2	0.036165	0.9201	0.0118142	1.00822	Color2 [DarkGray]	1	4		0.166136	0.102621	-0.0305784	-0.274723	0.0553928	0.0768459	0.0453972	-0.166923
CNOT1	0.536656	0.290633	0.148111	1.10812	Color2 [DarkGray]	1	4		-0.389855	0.0225981	-0.0994507	-0.0325761	-0.223593	0.0219376	0.187418	0.107397
LRRFIP1	0.340134	0.456948	-0.232367	0.851237	Color2 [DarkGray]	1	4		0.0131258	0.0310476	-0.0303183	0.137954	-1.04064	0.270708	0.0462559	-0.0539878
CTSD	0.127105	0.746268	-0.0989318	0.933724	Color2 [DarkGray]	1	4		-0.23267	0.245984	-0.0450406	0.00208361	-0.919212	0.138933	0.0668639	0.288046
GLG1	0.49844	0.317366	-0.21227	0.863178	Color2 [DarkGray]	1	4		0.229541	0.0536031	0.277264	-0.128605	-0.477192	-0.272602	0.0273382	0.305178
HNRNPK	0.39237	0.405163	0.458654	1.37426	Color2 [DarkGray]	1	4		-1.66841	0.0096952	0.269129	-0.379306	-0.768943	0.534021	0.0736603	0.226988
RNH1	0.141767	0.721494	0.0969924	1.06954	Color2 [DarkGray]	1	4		-0.614221	0.0889016	0.161125	-0.122397	-0.463077	-0.141681	0.454794	0.0513414
ANXA3	0.116734	0.764304	0.244253	1.18448	Color2 [DarkGray]	1	4		0.0732268	0.377538	-0.772441	-0.0744945	2.02379	-1.19505	-0.862104	0.614207
FLG	0.497483	0.318066	0.736702	1.66636	Color2 [DarkGray]	1	4		0.125835	-0.245269	-0.24177	0.00353764	-0.0234223	0.0422652	2.65674	-0.0864408
CALD1	0	1	NaN	#VALUE!	Color2 [DarkGray]	1	4		NaN	NaN	NaN	NaN	NaN	NaN	NaN	NaN
EIF4G2	0.206791	0.621167	0.0931028	1.06666	Color2 [DarkGray]	1	4		-0.238577	0.0737227	-0.0301696	-0.00563992	-0.406236	0.276742	-0.00855851	0.3098
DDX58	0.0340739	0.924541	0.049602	1.03498	Color2 [DarkGray]	1	4		-0.298957	1.029	-0.00429762	0.0464718	0.0291928	1.43994	-0.0727525	-0.425756
TJP2	0	1	NaN	#VALUE!	Color2 [DarkGray]	1	4		NaN	NaN	NaN	NaN	NaN	NaN	NaN	NaN
SSB	0.0196529	0.955756	-0.0137377	0.990523	Color2 [DarkGray]	1	4		-0.706207	0.0597968	0.117313	-0.0897389	-0.306693	0.11321	-0.504634	0.0243301
DDB1	0.164189	0.68519	-0.0571989	0.961128	Color2 [DarkGray]	1	4		-0.137609	0.0320308	0.239901	-0.059846	-0.341094	0.0840244	-0.0329756	0.135727
HNRNPL	0.347104	0.449672	0.0799906	1.05701	Color2 [DarkGray]	1	4		-0.285274	-0.0234087	0.029345	-0.0597458	0.0570694	0.139803	-0.191107	-0.0248867
APOA4	0.601017	0.250601	0.549105	1.46318	Color2 [DarkGray]	1	4		0.471184	-0.365569	-0.255046	-0.342344	1.33949	-0.458221	0.679745	0.143634
ALDH7A1	0.0640281	0.862923	0.0514433	1.0363	Color2 [DarkGray]	1	4		-0.320063	-0.176034	0.679205	0.0758786	0.0246035	-0.160899	0.647688	-0.0466325
PDIA6	0.0632439	0.864482	-0.0233367	0.983954	Color2 [DarkGray]	1	4		-0.206997	0.015095	0.220932	-0.0421869	-0.175979	0.143666	-0.211467	0.137277
HNRNPK	0.420098	0.380104	-0.246843	0.842739	Color2 [DarkGray]	1	4		0.00104046	-0.190608	0.0736871	0.201553	-0.938104	0.201705	-0.123165	-0.0421351
KNG1	0.264177	0.544281	0.511327	1.42536	Color2 [DarkGray]	1	4		0.0242136	0.96841	-0.0456895	-0.0235397	2.86616	-0.615036	0.0239014	0.693678
SBSN	0.224446	0.596423	-0.466078	0.72393	Color2 [DarkGray]	1	4		0.0507627	-1.29974	0.320729	0.0643241	-2.79391	-0.0202416	0.668239	-0.582329
TRAP1	1.72017	0.0190472	0.421499	1.33932	Color2 [DarkGray]	1	4		-0.425909	-0.36974	0.026541	-0.188668	0.108189	0.145142	0.0468679	0.428021
PSMD12	0.565912	0.271699	0.142028	1.10345	Color2 [DarkGray]	1	4		-0.317661	0.249197	-0.0753078	-0.0487083	0.058681	0.119427	0.0710163	0.126505
NONO	0.246359	0.567075	-0.0791434	0.94662	Color2 [DarkGray]	1	4		0.244983	-0.0978642	0.070751	0.0854141	-0.0959914	0.324929	-0.0888824	-0.153345
NME1-NME2	0.54196	0.287104	-0.232537	0.851137	Color2 [DarkGray]	1	4		-0.115442	0.00758784	0.0936859	0.153888	-0.766141	-0.00403295	-0.0529144	0.0326579
UQCRC1	0.768174	0.17054	0.192288	1.14257	Color2 [DarkGray]	1	4		-0.0151594	-0.3108	0.0440063	0.0149469	0.218559	-0.0408111	-0.0151584	0.339558
CPNE3	0.26662	0.541227	0.162805	1.11946	Color2 [DarkGray]	1	4		0.101474	-0.415172	-0.100183	0.17329	0.662681	-0.192118	-0.269236	0.209301
TRIM28	0.292189	0.510283	0.079205	1.05644	Color2 [DarkGray]	1	4		-0.325007	0.00993537	0.208534	-0.123105	0.0551	-0.0051626	-6.86227e-05	0.0373092
SLC4A1	0.772702	0.168771	1.2284	2.34306	Color2 [DarkGray]	1	4		0.136204	-0.0799621	-0.795289	-0.13781	1.99264	-0.554537	2.5905	0.00811227
DIP2B	1.39245	0.0405085	0.26994	1.20576	Color2 [DarkGray]	1	4		0.042771	-0.232294	-0.325903	-0.051375	0.0182138	0.186607	0.272174	0.0359644
LDHB	0.175964	0.666862	-0.115833	0.922849	Color2 [DarkGray]	1	4		0.00161762	-0.0680926	0.0801453	0.0512144	-0.560925	0.0292611	-0.428012	0.561228
MYBBP1A	0.658125	0.219723	0.217554	1.16276	Color2 [DarkGray]	1	4		-0.472259	-0.131386	0.0533181	0.1515	-0.0317532	0.28347	-0.00487931	0.22455
RPL4	0.0901489	0.812552	-0.0710628	0.951936	Color2 [DarkGray]	1	4		0.0181808	-0.246309	0.0293899	-0.0760107	-0.951519	0.173668	0.277854	-0.0590043
ERAP1	0.0909034	0.811141	0.109715	1.07901	Color2 [DarkGray]	1	4		-0.409355	0.288268	-0.0379174	0.104084	-0.459528	1.30425	-0.421195	-0.0395889
IDH2	0.187809	0.648919	0.109122	1.07857	Color2 [DarkGray]	1	4		-0.36678	0.437679	0.0486174	-0.303697	-0.02659	-0.267736	0.32226	0.224375
ATP6V1B2	0.632752	0.232942	0.300055	1.23119	Color2 [DarkGray]	1	4		-0.628384	0.132477	-0.0453808	-0.580795	-0.268854	0.06077	0.318613	-0.032392
UNC45A	0.176591	0.6659	0.0537209	1.03794	Color2 [DarkGray]	1	4		0.0866039	0.20301	-0.256418	-0.0248319	0.23125	-0.0358018	0.0859833	-0.0581845
TPP2	0.0590012	0.872969	0.0180388	1.01258	Color2 [DarkGray]	1	4		0.0251137	-0.0482423	0.00518609	-0.137389	0.0361884	-0.287359	0.202674	-0.0346797
UQCRC2	0.418617	0.381402	0.175382	1.12926	Color2 [DarkGray]	1	4		-0.376974	-0.014439	0.161635	-0.0123776	0.235569	-0.0975518	-0.152357	0.47371
KRT18	0.146509	0.71366	-0.261484	0.834229	Color2 [DarkGray]	1	4		0.247375	0.435331	-0.291832	-0.483527	0.999586	-0.192954	-2.06109	0.115866
DPP3	0.108637	0.778688	0.0322485	1.0226	Color2 [DarkGray]	1	4		0.00635039	0.0607686	-0.123769	0.0888117	-0.180726	0.0246392	0.0160829	0.30116
HPX	0.161564	0.689344	0.208424	1.15542	Color2 [DarkGray]	1	4		-0.835631	0.425005	0.117789	-0.163834	1.21451	-0.79785	-0.108012	0.0683753
USP7	1.33524	0.0462122	0.235641	1.17743	Color2 [DarkGray]	1	4		-0.026875	0.0338765	-0.0578984	-0.179643	0.153918	-0.0313364	0.366579	0.222865
USP5	0.538688	0.289276	0.182369	1.13475	Color2 [DarkGray]	1	4		-0.245165	0.0015386	0.0482557	-0.0283517	-0.186471	-0.0364604	0.423865	0.304821
KRT78	0.243485	0.570841	0.360955	1.28428	Color2 [DarkGray]	1	4		0.307933	-0.547765	0.734884	-0.916399	-0.526188	-0.109684	1.60986	0.0484814
DST	0.10101	0.792484	-0.0744688	0.949692	Color2 [DarkGray]	1	4		0.267471	-0.101454	-0.310965	0.373297	-0.274875	0.580797	-0.402741	0.0272929
COL1A1	0.24025	0.575109	-0.400687	0.757498	Color2 [DarkGray]	1	4		1.15421	-1.40234	0.816585	0.0716234	-1.15374	-0.288814	0.640292	-0.160405
PREP	0.245452	0.568262	-0.106044	0.929132	Color2 [DarkGray]	1	4		-0.111599	0.131572	-0.0797389	0.0413166	-0.380549	0.0941023	0.250429	-0.406608
PDLIM1	0.0602819	0.870398	0.0627793	1.04448	Color2 [DarkGray]	1	4		0.121733	-0.317247	-0.123246	0.144395	-0.789535	0.558846	0.656739	-0.349299
RUVBL1	0.1987	0.632849	0.073545	1.0523	Color2 [DarkGray]	1	4		-0.221201	0.198188	0.179726	-0.374119	0.0115706	0.0888395	0.0103533	-0.0339884
DNM2	0.369852	0.426725	-0.0566236	0.961512	Color2 [DarkGray]	1	4		0.137409	0.0590236	-0.0292643	-0.00652721	-0.081188	-0.131633	0.038047	0.108921
YARS	0.121896	0.755272	-0.0498658	0.966026	Color2 [DarkGray]	1	4		-0.146341	-0.00971388	0.0388334	0.137817	-0.413151	-0.0982951	0.0932399	0.239339
HSD17B10	0.326495	0.471525	-0.172873	0.887075	Color2 [DarkGray]	1	4		-0.00645413	0.642216	0.60795	-0.100989	0.42506	0.020225	0.079468	-0.0735207
CALU	0.0286768	0.936102	-0.0107281	0.992591	Color2 [DarkGray]	1	4		-0.00218704	0.0667107	0.0225598	-0.0324509	0.0519869	0.338264	-0.232044	-0.146487
SQOR	0.0870141	0.818438	-0.0653315	0.955726	Color2 [DarkGray]	1	4		-0.115867	0.804649	0.2578	-0.0562906	0.672264	-0.0535877	0.0373608	-0.0270718
ILF2	0.321229	0.477278	-0.151293	0.900443	Color2 [DarkGray]	1	4		-0.161024	0.132729	0.0804765	-0.00122598	-0.623341	-0.00957329	-0.199406	0.278102
ANPEP	0.0234513	0.947433	0.0264421	1.0185	Color2 [DarkGray]	1	4		-0.33703	-0.556576	0.844431	0.5164	0.697576	-0.149355	0.0220948	0.00267803
ITGB2	0.0208657	0.953091	-0.04567	0.96884	Color2 [DarkGray]	1	4		0.894134	-0.180101	-0.120726	0.0778699	1.66535	-0.504462	-1.50255	0.830164
AFDN	0.0960727	0.801544	-0.0408499	0.972082	Color2 [DarkGray]	1	4		0.229082	-0.0858051	-0.145315	0.174336	-0.256598	0.0642696	0.319656	-0.11843
SFPQ	0.371041	0.425558	-0.278822	0.824264	Color2 [DarkGray]	1	4		0.100353	-0.488091	-0.0307782	0.0170553	-1.25162	0.0496414	-0.268224	-0.0465417
DDX3Y	0.774979	0.167889	0.658981	1.57897	Color2 [DarkGray]	1	4		-0.606687	-1.29773	-0.210823	0.151773	0.440909	0.578932	-0.666819	0.319438
MARS	0.293375	0.508891	-0.0184695	0.98728	Color2 [DarkGray]	1	4		-0.0335205	-0.0227549	0.039914	0.0290386	-0.0652384	0.026258	-0.00896929	-0.013251
IMPDH2	0.387612	0.409626	0.124134	1.08985	Color2 [DarkGray]	1	4		-0.0577068	0.0477853	0.0447381	-0.301661	0.270414	-0.250271	0.0336441	0.175905
AP3B1	0.454874	0.350854	-0.107775	0.928018	Color2 [DarkGray]	1	4		0.0610836	0.120996	0.0240237	-0.0896478	-0.217648	-0.0303124	0.175106	-0.241792
DYSF	0.0255396	0.942889	0.0341821	1.02398	Color2 [DarkGray]	1	4		0.436128	-0.273427	0.00527554	-0.0412239	0.885603	-0.347379	-0.951394	0.67665
PGM2	0.00619403	0.985839	0.00468374	1.00325	Color2 [DarkGray]	1	4		-0.0660993	-0.495779	0.0671428	0.162108	-0.641133	-0.132608	0.284903	0.174946
RANGAP1	0.4056	0.393007	-0.246944	0.84268	Color2 [DarkGray]	1	4		0.0276226	0.343044	-0.336689	-0.0269713	-0.88927	0.125043	-0.253966	0.0374248
C9	0.221051	0.601103	0.557441	1.47166	Color2 [DarkGray]	1	4		-0.0627338	0.847637	-0.263736	0.0588005	3.09454	-0.989373	-0.812096	1.51666
TARS	0.448	0.356451	-0.121677	0.919119	Color2 [DarkGray]	1	4		0.0211054	0.250005	-0.167151	0.0084753	-0.327983	0.0100348	-0.117746	0.0614208
LRBA	0.0142426	0.967737	0.00756005	1.00525	Color2 [DarkGray]	1	4		-0.226182	0.156289	-0.0237851	-0.0119211	-0.213693	-0.371361	0.243438	0.266257
NOP58	0.179256	0.661826	0.107956	1.0777	Color2 [DarkGray]	1	4		-0.141411	-0.153924	0.301396	-0.090811	-0.521795	0.346265	0.15685	0.365755
RUVBL2	1.24423	0.0569866	-0.195818	0.873078	Color2 [DarkGray]	1	4		-0.0707104	0.133164	0.0775052	0.219519	-0.251573	-0.0856236	-0.110988	0.0243893
PML	0.350057	0.446625	-0.341854	0.789026	Color2 [DarkGray]	1	4		-0.0191027	0.676223	-0.10584	0.041409	0.0793214	0.739294	-0.970542	-0.622802
GARS	0.155802	0.69855	-0.0898453	0.939623	Color2 [DarkGray]	1	4		-0.616665	0.326005	0.0631148	0.187716	-0.307821	0.0147043	-0.0393394	-0.0667559
KRT3	0.303469	0.4972	-0.195021	0.87356	Color2 [DarkGray]	1	4		0.738766	0.0905116	-0.0818233	-0.112144	-0.538802	-0.0594007	0.153528	0.299902
GLUD1	0.814516	0.153279	-0.207974	0.865752	Color2 [DarkGray]	1	4		0.269649	-0.0209328	0.204865	-0.000897341	-0.00312616	0.0244749	0.00650192	-0.407063
NAPA	0.394772	0.402928	0.127858	1.09267	Color2 [DarkGray]	1	4		-0.0449933	0.0606941	-0.243607	-0.0546517	0.224278	0.200374	0.123168	-0.318948
NDUFS1	1.03434	0.0923973	0.23153	1.17408	Color2 [DarkGray]	1	4		-0.189479	-0.34111	0.154192	-0.16355	0.155287	-0.0550012	0.151968	0.133919
DDX39B	0.648089	0.224859	-0.132117	0.912492	Color2 [DarkGray]	1	4		-0.0656231	0.0418327	0.0396497	0.115137	-0.0492368	-0.0398027	-0.361309	0.0528765
VDAC1	0.972349	0.106574	-0.153927	0.8988	Color2 [DarkGray]	1	4		-0.0103758	0.14005	0.0710873	0.0712694	0.0438612	0.00622317	-0.102873	-0.29089
NSUN2	0.374184	0.422489	0.154381	1.11294	Color2 [DarkGray]	1	4		0.0775642	0.0501132	-0.179439	-0.250449	0.527313	-0.0487174	-0.216912	0.0536295
PLAA	0.117057	0.763736	0.0411496	1.02893	Color2 [DarkGray]	1	4		-0.0512901	0.192079	0.0740877	-0.0110272	0.0305988	0.426037	0.0512833	-0.139471
DOCK9	0.229948	0.588914	-0.0819677	0.944768	Color2 [DarkGray]	1	4		-0.0941125	0.0144077	0.178183	0.0148878	-0.259064	-0.285142	0.0688258	0.260875
DARS	0.376154	0.420578	0.0720586	1.05122	Color2 [DarkGray]	1	4		-0.10627	0.213944	-0.13541	-0.0250923	0.0447118	-0.00794274	0.107127	0.0915096
RSL1D1	0.0109332	0.97514	0.00890187	1.00619	Color2 [DarkGray]	1	4		0.00545151	-0.399852	0.159577	-0.00494083	-0.64362	0.508411	-0.215356	0.146408
HARS	0.390687	0.406736	-0.099484	0.933367	Color2 [DarkGray]	1	4		-0.152342	0.0680758	0.0377008	0.0345847	-0.367437	0.105792	-0.031408	-0.116864
RTCB	0.134234	0.734118	-0.0490658	0.966562	Color2 [DarkGray]	1	4		0.00707998	-0.0620953	0.0580748	-0.00653602	-0.423775	0.205118	-0.0573906	0.0763079
EHD4	0.178108	0.663578	-0.0826371	0.94433	Color2 [DarkGray]	1	4		-0.25623	0.458108	-0.0737808	0.0358363	-0.0446756	0.165419	-0.306015	0.0186568
HBD	0.273492	0.532731	0.436533	1.35335	Color2 [DarkGray]	1	4		0.0446961	-0.377463	-1.28663	-0.0444054	1.10809	-1.59673	0.580448	-0.00946976
SCFD1	0.120689	0.757375	-0.0591477	0.959831	Color2 [DarkGray]	1	4		-0.00407667	-0.0301259	0.0545662	-0.159519	-0.622449	0.10571	0.113272	0.0277208
KHSRP	0.191651	0.643205	-0.0959498	0.935656	Color2 [DarkGray]	1	4		-0.00144073	-0.211543	0.177005	0.00177188	-0.610399	0.227617	-0.0797964	0.0445724
IDH1	0.226681	0.593361	-0.189117	0.877142	Color2 [DarkGray]	1	4		-0.771561	0.0130715	0.2213	0.130146	-0.907097	-0.00964505	0.204932	-0.451702
MDH2	0.257493	0.552722	-0.0840018	0.943437	Color2 [DarkGray]	1	4		-0.0509794	-0.0215364	0.319719	-0.00539416	-0.253667	0.209978	-0.114832	0.0643229
FLII	0.416719	0.383073	-0.149581	0.901512	Color2 [DarkGray]	1	4		-0.162154	0.202936	0.0855384	0.0146604	-0.501213	0.156491	-0.0145862	-0.0980346
UGDH	0.0834979	0.825091	0.0264521	1.0185	Color2 [DarkGray]	1	4		0.0336314	-0.0869291	-0.174039	-0.0330593	0.101344	-0.34435	0.10601	-0.0175912
SF3B2	0.471906	0.337361	-0.305345	0.809249	Color2 [DarkGray]	1	4		0.267972	-0.219774	0.10374	0.0526823	-1.0462	0.219702	-0.0511689	-0.139089
BAG3	1.3183	0.0480509	1.00216	2.00299	Color2 [DarkGray]	1	4		-0.552006	-1.14	-0.397457	0.0168544	0.0210876	1.36277	0.595363	-0.0431993
NPM1	0.185219	0.652802	-0.136519	0.909712	Color2 [DarkGray]	1	4		0.0306192	-0.158382	0.196128	0.0823516	-0.845529	0.501895	0.0197746	-0.0714986
MYO1E	0.531208	0.294301	-0.154775	0.898273	Color2 [DarkGray]	1	4		0.240604	0.188001	-0.220198	0.168547	0.16693	-0.129063	-0.0561057	-0.223907
LGALS3BP	0.1903	0.645209	0.250904	1.18995	Color2 [DarkGray]	1	4		-0.515002	0.941785	-0.42284	0.0612738	1.35857	0.311787	-0.452839	-0.148685
OAS3	0.151627	0.705299	-0.234479	0.849992	Color2 [DarkGray]	1	4		-0.535676	1.40406	0.0889913	-0.132754	0.149147	1.07666	-0.709928	-0.629167
EIF3B	0.66199	0.217776	0.225543	1.16922	Color2 [DarkGray]	1	4		-0.535013	0.0289771	-0.0512872	-0.0993209	-0.225896	0.234306	0.193864	0.0432538
PSMC5	0.034571	0.923483	-0.00922089	0.993629	Color2 [DarkGray]	1	4		-0.130776	0.243622	-0.0459897	0.0096894	-0.00747806	0.0646262	-0.110039	0.0925534
NNT	0.139529	0.725222	0.107707	1.07751	Color2 [DarkGray]	1	4		0.222696	-0.15584	0.335854	-0.078417	0.97689	-0.217647	0.00219266	-0.00631464
SVIL	0.490896	0.322927	-0.266052	0.831592	Color2 [DarkGray]	1	4		0.177148	-0.2685	0.477917	0.389567	-0.134763	-0.263471	0.459149	-0.34899
WASHC2A	0.0873268	0.817849	-0.0595985	0.959531	Color2 [DarkGray]	1	4		-0.035673	-0.108238	-0.0116018	0.116322	-0.755605	0.327057	0.216522	-0.0655595
KNG1	0	1	NaN	#VALUE!	Color2 [DarkGray]	1	4		NaN	NaN	NaN	NaN	NaN	NaN	NaN	NaN
NAGK	0.40848	0.390409	-0.244091	0.844348	Color2 [DarkGray]	1	4		-0.382029	0.36583	0.509288	-0.0431525	-0.178245	0.132687	0.112109	-0.592979
LAMA4	0.691776	0.20334	-0.423835	0.745441	Color2 [DarkGray]	1	4		0.474396	-0.607617	0.480561	0.416765	-0.364197	-0.187978	-0.49109	0.112033
GTF2I	0.0802557	0.831274	0.0408167	1.0287	Color2 [DarkGray]	1	4		-0.0957722	-0.108911	0.128018	0.174857	-0.327009	0.00291011	0.0968221	0.488734
SHMT2	0.0659706	0.859072	0.0331238	1.02323	Color2 [DarkGray]	1	4		-0.285022	-0.189738	0.275965	0.226889	0.151388	-0.225391	-0.0307505	0.265342
GSTP1	0.802407	0.157614	-0.245831	0.84333	Color2 [DarkGray]	1	4		0.0792658	0.145984	-0.121327	0.402399	-0.39352	-0.110078	0.131037	-0.104441
CFB	0.0264227	0.940973	0.043959	1.03094	Color2 [DarkGray]	1	4		-0.333542	1.02621	-0.260396	0.189047	1.41524	-0.720706	-0.36735	0.469974
SEC23A	0.29325	0.509038	-0.0720078	0.951313	Color2 [DarkGray]	1	4		0.107061	-0.116469	0.0663538	-0.0443226	0.06357	0.0945321	-0.275746	-0.157765
FH	0.0885768	0.815499	-0.0268408	0.981567	Color2 [DarkGray]	1	4		0.0708255	-0.0576869	0.205883	-0.170049	-0.129101	0.158329	-0.147882	0.060264
VPS35	0.125858	0.748415	-0.0435512	0.970264	Color2 [DarkGray]	1	4		-0.322589	0.210311	0.124811	0.117585	-0.000326116	-0.0708463	0.121747	-0.0946617
SF3A1	0.404051	0.394411	-0.222319	0.857186	Color2 [DarkGray]	1	4		-0.0430867	-0.267	0.0886724	0.0596382	-0.922744	0.0836627	-0.2115	-0.000471826
RNPEP	0.780762	0.165668	-0.331879	0.794501	Color2 [DarkGray]	1	4		-0.343884	0.27522	0.56651	0.275765	0.0409866	-0.363608	-0.168432	-0.0628507
NAA15	0.270296	0.536666	-0.0505768	0.96555	Color2 [DarkGray]	1	4		0.0343187	-0.0195317	-0.0683956	0.0615963	-0.215371	0.12996	-0.0839192	-0.0249891
UBAP2L	0.114349	0.768512	-0.0835566	0.943728	Color2 [DarkGray]	1	4		-0.217853	-0.191642	0.0554137	0.182039	-0.839308	0.260176	0.209059	-0.136196
RPL5	0.0434596	0.904775	0.0179503	1.01252	Color2 [DarkGray]	1	4		-0.0582746	-0.120747	0.0309392	0.123565	-0.35835	0.0852668	0.0421891	0.278178
INF2	0.447775	0.356636	-0.22828	0.853652	Color2 [DarkGray]	1	4		0.285894	-0.0718013	0.0058767	0.00698157	-0.712895	0.259481	0.0684621	-0.301217
TFRC	0.215505	0.608828	0.236682	1.17828	Color2 [DarkGray]	1	4		-0.574455	0.649905	-0.98629	0.157272	0.673879	0.170772	-0.408481	-0.243008
FABP5	0.0771371	0.837265	0.0980226	1.07031	Color2 [DarkGray]	1	4		-0.346805	-0.0954703	-0.330073	0.647961	-1.02787	0.607733	0.665837	0.0220067
WASHC5	0.146843	0.71311	0.0542567	1.03832	Color2 [DarkGray]	1	4		-0.0396805	0.144617	-0.100824	0.0378971	0.423748	-0.054033	-0.182088	0.0714085
ANXA8L1	0.195532	0.637482	0.209935	1.15664	Color2 [DarkGray]	1	4		0.389626	0.078141	-0.104816	-1.05728	-0.607188	0.693678	0.290689	-0.231773
EIF3C	0.817288	0.152304	-0.29292	0.816248	Color2 [DarkGray]	1	4		0.31479	-0.0541776	0.0312105	0.0354804	-0.638398	0.0607719	0.00296537	-0.269715
CLU	0.300186	0.500972	0.720471	1.64772	Color2 [DarkGray]	1	4		1.35839	-0.115377	-0.0589694	0.0220232	3.49525	-0.411607	-0.483592	1.4879
ECM1	0.0438509	0.90396	-0.0316896	0.978274	Color2 [DarkGray]	1	4		-0.250636	0.558803	0.022754	-0.196354	0.00120028	-0.467034	0.339127	0.134514
BAG3	0.0672238	0.856596	0.122927	1.08894	Color2 [DarkGray]	1	4		-0.0283868	-0.706388	0.032764	0.331383	-1.27568	1.51157	0.492366	-0.607178
TRIM25	1.43927	0.0363693	-0.52459	0.695157	Color2 [DarkGray]	1	4		-0.001397	0.475442	0.144895	0.253619	-0.602333	0.0321895	-0.0685575	-0.587099
PCBP1	0.496115	0.319069	-0.141053	0.906857	Color2 [DarkGray]	1	4		0.126651	0.163364	-0.0288595	-0.106843	-0.415555	-0.0699865	0.124065	-0.048422
CSDE1	0.252809	0.558716	0.104576	1.07518	Color2 [DarkGray]	1	4		-0.385659	-0.0274313	-0.142911	0.149127	-0.337302	0.180927	0.208949	-0.0411428
EHBP1L1	0.119218	0.759945	-0.051139	0.965174	Color2 [DarkGray]	1	4		0.204833	-0.0585802	-0.214544	0.105478	-0.421306	-0.00186016	0.101531	0.154267
HNRNPA1	0.361105	0.435406	0.322515	1.25051	Color2 [DarkGray]	1	4		-1.2091	-0.00087755	-0.02057	-0.149646	-0.767459	0.376455	0.098596	0.20227
UBAP2L	0.125527	0.748985	0.0774564	1.05516	Color2 [DarkGray]	1	4		0.413674	-0.43856	-0.513313	0.0920501	-0.226933	0.0633864	0.0604312	-0.0332085
AP3D1	0.292458	0.509967	0.0493086	1.03477	Color2 [DarkGray]	1	4		-0.154938	0.0689042	-0.0798892	0.0246072	-0.0366305	0.0279348	0.144811	-0.0801976
SRP72	0.529828	0.295238	-0.126701	0.915923	Color2 [DarkGray]	1	4		0.127663	0.0705814	-0.0885376	-0.0868296	-0.293599	0.0829871	-0.274733	0.00141764
ARCN1	0.766544	0.171181	-0.22726	0.854256	Color2 [DarkGray]	1	4		0.0595684	0.0306434	-0.0166695	-0.0189869	-0.62105	0.0531822	-0.19426	-0.0923566
ITGAV	0.295454	0.506461	-0.246439	0.842975	Color2 [DarkGray]	1	4		0.020218	0.259537	-0.0141949	0.32362	0.825489	-0.0592755	-0.41842	-0.744368
PUF60	0.300246	0.500904	-0.172653	0.88721	Color2 [DarkGray]	1	4		0.0767065	-0.134763	-0.0729057	0.17994	-0.771982	0.221023	-0.258233	0.167559
CLTCL1	0.152787	0.703418	0.0794734	1.05663	Color2 [DarkGray]	1	4		0.107551	-0.0249354	-0.0527281	-0.00207362	-0.128865	0.328175	0.494608	-0.348211
HECTD1	0.321483	0.476999	0.10912	1.07857	Color2 [DarkGray]	1	4		-0.135246	0.145669	-0.181458	-0.101589	0.116907	-0.327506	0.187364	0.187092
AHCY	0.116859	0.764083	0.0434337	1.03056	Color2 [DarkGray]	1	4		-0.109411	0.0590584	0.273721	-0.0889282	-0.0791858	-0.118317	0.177635	0.328043
SERPINA3	0.18975	0.646027	-0.300363	0.812048	Color2 [DarkGray]	1	4		-0.765405	0.89202	0.213254	0.57293	1.42677	-0.630193	-0.751733	-0.333498
KLC1	2.48442	0.00327781	-0.436037	0.739162	Color2 [DarkGray]	1	4		0.256105	0.439541	0.11794	0.133633	-0.346145	-0.15664	-0.0855154	-0.208631
APEX1	0.378356	0.41845	-0.220337	0.858365	Color2 [DarkGray]	1	4		-0.102656	-0.0525327	0.340265	0.210398	-0.253526	0.0547846	-0.68599	0.398859
PSMD11	0.320756	0.477797	0.0422002	1.02968	Color2 [DarkGray]	1	4		-0.0540228	0.152511	-0.0638907	0.0162994	-0.0143827	0.0934511	0.0520439	0.0885856
SMC1A	0.700644	0.199231	-0.201621	0.869573	Color2 [DarkGray]	1	4		0.231543	-0.198267	0.0586252	0.0304674	-0.320311	-0.0428723	-0.386217	0.0652833
ETFA	0.316706	0.482274	0.10077	1.07235	Color2 [DarkGray]	1	4		-0.465374	-0.0359772	0.137273	0.0494672	0.0058224	0.0390673	-0.0124493	0.0560286
KARS	0.247551	0.565521	0.12971	1.09407	Color2 [DarkGray]	1	4		-0.594562	0.0185451	-0.0404067	-0.124144	-0.538269	0.118687	0.125466	0.0723889
PNP	0.573257	0.267143	-0.256408	0.83717	Color2 [DarkGray]	1	4		0.0239585	0.602662	-0.161216	0.0534271	-0.315855	0.00717633	-0.369997	0.171875
ABCF1	0.247548	0.565525	-0.0606118	0.958857	Color2 [DarkGray]	1	4		0.287704	-0.103002	-0.00549161	0.146365	-0.070112	0.00023147	-0.0131034	0.166112
LONP1	0.26931	0.537885	0.0743257	1.05287	Color2 [DarkGray]	1	4		-0.376365	0.088803	0.0605416	-0.0726723	-0.11615	0.0305281	0.0689411	0.0142916
KRT9	0.365386	0.431136	-0.234018	0.850264	Color2 [DarkGray]	1	4		1.05188	0.0558184	0.0108147	-0.085382	0.254424	-0.0221158	-0.0468017	-0.0884434
ATP2B4	0.597952	0.252376	0.11856	1.08565	Color2 [DarkGray]	1	4		0.0584157	-0.27753	-0.0470307	-0.0320252	-0.0553471	0.0213958	0.218886	-0.00886572
ERO1A	0.19616	0.636561	-0.108362	0.92764	Color2 [DarkGray]	1	4		-0.103262	0.041876	0.418457	-0.120236	0.00456579	0.238729	0.124517	-0.564427
CORO1A	1.15052	0.0707091	-0.792088	0.577508	Color2 [DarkGray]	1	4		0.465597	0.0423362	0.0188432	0.115243	0.00531392	-0.639846	-1.59087	-0.30093
HLA-A	0.827509	0.148762	1.12039	2.17406	Color2 [DarkGray]	1	4		-0.427407	-0.746703	1.03617	-0.496777	1.86021	-0.196773	0.270595	1.91283
TPM4	0.0164839	0.962756	-0.018813	0.987045	Color2 [DarkGray]	1	4		-0.325743	-0.301664	0.296605	0.182049	-0.935839	0.409345	0.600188	-0.297699
TRIM16	0.182037	0.657602	0.137901	1.1003	Color2 [DarkGray]	1	4		-0.674707	0.0448607	-0.0681671	0.522181	-0.105311	0.122046	0.545958	-0.186921
PRKCSH	0.254202	0.556927	-0.0656945	0.955485	Color2 [DarkGray]	1	4		0.120707	-0.249695	0.0652722	-0.0377541	-0.18684	0.0775948	-0.210058	-0.0449458
C1R	0.166185	0.682048	0.464765	1.38009	Color2 [DarkGray]	1	4		-0.0992186	0.988741	0.0349484	-0.0724061	3.53122	-1.16335	-0.58556	0.928813
DDX5	0.0123618	0.971937	-0.00630067	0.995642	Color2 [DarkGray]	1	4		-0.00878067	0.000882345	-0.0223451	0.119122	-0.376146	0.425929	-0.0917507	0.105643
DBNL	0.431919	0.369897	-0.387461	0.764474	Color2 [DarkGray]	1	4		0.353879	-0.41687	0.0567371	0.153243	-1.36116	-0.0657035	0.35284	-0.328827
DYNC1I2	0.096184	0.801339	-0.0751184	0.949264	Color2 [DarkGray]	1	4		-0.375419	-0.149992	0.115535	0.477222	-0.483329	0.378527	-0.383478	0.255152
GMPS	0.0415238	0.908817	0.0295216	1.02067	Color2 [DarkGray]	1	4		-0.239548	0.116517	-0.149376	0.189795	-0.338261	0.57661	-0.364304	0.16143
CFL1	0.141069	0.722655	-0.0421269	0.971222	Color2 [DarkGray]	1	4		0.0453317	0.205467	-0.096298	0.178096	-0.00107968	-0.0146026	-0.118217	0.29799
NASP	0.266635	0.54121	-0.170024	0.888828	Color2 [DarkGray]	1	4		0.028499	-0.0136284	-0.224206	-0.00125499	-0.555731	0.342243	-0.74481	0.0676134
LETM1	0.507527	0.310794	0.110956	1.07994	Color2 [DarkGray]	1	4		-0.0460126	-0.251398	0.0524166	-0.0360823	-0.189249	0.135282	0.105222	0.111494
TOP2B	0.66669	0.215432	-0.11514	0.923292	Color2 [DarkGray]	1	4		-0.0310098	0.0096378	0.14797	0.0573489	-0.154238	-0.00612577	-0.222037	0.105786
TXNDC5	0.524785	0.298686	-0.375703	0.77073	Color2 [DarkGray]	1	4		0.553874	-0.338648	0.921741	0.0262391	-0.440968	-0.0383423	-0.245285	0.384991
IFIT1	0.0149568	0.966147	-0.0367068	0.974878	Color2 [DarkGray]	1	4		-0.215261	1.43974	0.103078	-0.149294	0.683295	2.11427	-0.547881	-1.21825
DBNL	0.0968518	0.800107	-0.0745978	0.949607	Color2 [DarkGray]	1	4		0.033927	-0.0191326	0.229901	-0.0763562	-0.696832	0.156504	0.59886	-0.188584
UGP2	0.0476391	0.896109	-0.0150846	0.989599	Color2 [DarkGray]	1	4		-0.158299	0.126466	0.0179055	-0.0543358	-0.181692	0.0999898	0.155483	-0.202383
MTDH	0.332672	0.464867	-0.226627	0.854631	Color2 [DarkGray]	1	4		-0.0264212	-0.0131513	-0.00830854	0.134247	-0.958495	0.271622	-0.351137	0.217869
PAK2	0.42547	0.375431	-0.1175	0.921784	Color2 [DarkGray]	1	4		-0.044878	0.104126	-0.0149863	0.362841	-0.0786807	0.219831	-0.141881	-0.0621663
OPA1	0.0130221	0.970461	0.00753025	1.00523	Color2 [DarkGray]	1	4		-0.00471072	-0.0616443	0.109026	0.228754	-0.210426	0.616111	-0.0675758	-0.036563
ANXA8	0.151938	0.704793	0.100628	1.07224	Color2 [DarkGray]	1	4		0.304629	-0.0295689	-0.257936	-0.400858	0.0630603	0.323298	0.209409	-0.576987
NES	0.117164	0.763548	-0.1057	0.929354	Color2 [DarkGray]	1	4		0.264975	-0.934879	-0.0280263	0.0839939	-0.495095	0.198038	-0.690441	-0.04924
PA2G4	0.474928	0.335021	-0.184658	0.879858	Color2 [DarkGray]	1	4		0.0210457	0.00625039	0.110096	-0.0203653	-0.659805	0.132389	-0.0133373	-0.0808504
USP15	0.281646	0.522822	0.105294	1.07571	Color2 [DarkGray]	1	4		-0.176122	0.307837	-0.0993606	-0.049819	-0.12394	0.185575	0.375336	-0.0332609
PSME1	0.343698	0.453213	-0.188016	0.877812	Color2 [DarkGray]	1	4		0.0239333	0.688903	-0.041584	0.0699375	-0.347405	0.403974	0.0870465	-0.154489
DHX15	0.16743	0.680096	0.0483501	1.03408	Color2 [DarkGray]	1	4		-0.146704	0.0305353	-0.224162	0.0875342	0.0121156	0.0374447	-0.252696	0.143739
ITIH1	0.00855772	0.980488	-0.0171683	0.98817	Color2 [DarkGray]	1	4		0.0266869	0.657714	-0.328654	-0.0260277	1.58118	-1.45009	-0.343082	0.473043
SARS	1.00187	0.09957	-0.193886	0.874248	Color2 [DarkGray]	1	4		-0.0014867	0.202356	0.00715973	0.0767151	-0.367005	0.0509565	-0.0792709	-0.0954795
CYB5R3	0.576659	0.265058	-0.147874	0.90258	Color2 [DarkGray]	1	4		-0.202966	0.174259	0.311209	0.108094	-0.0296111	0.0764886	-0.076898	-0.17088
ZC3HAV1	0.208306	0.619005	-0.0875263	0.941135	Color2 [DarkGray]	1	4		0.216399	0.0118493	-0.100902	0.288314	-0.197491	0.430801	-0.0874055	-0.0803482
ASCC3	1.00617	0.0985896	-0.16694	0.89073	Color2 [DarkGray]	1	4		-0.0743742	0.213078	0.0526561	0.0406397	0.0488296	-0.216624	-0.197222	-0.0707457
GNAI2	0.166729	0.681194	-0.104664	0.930021	Color2 [DarkGray]	1	4		0.292072	-0.0226393	0.00102843	-0.0526301	0.57903	-0.3001	-0.4624	-0.017356
PSMD3	0.738488	0.182605	-0.12342	0.918009	Color2 [DarkGray]	1	4		0.132859	0.209946	-0.110563	0.0484132	-0.0322365	-0.147123	-0.0943174	0.0606521
PDCD11	0.186491	0.650891	-0.0410457	0.97195	Color2 [DarkGray]	1	4		0.134561	-0.212722	0.00168273	0.0212347	-0.0770084	0.0778996	-0.141283	-0.0790343
C8B	0.323028	0.475305	0.688337	1.61142	Color2 [DarkGray]	1	4		0.0678134	0.693998	-0.509558	-0.068691	3.02712	-0.587905	-0.642884	1.14058
TPM4	0.597106	0.252868	-0.381771	0.767495	Color2 [DarkGray]	1	4		0.298696	-0.200456	0.037713	0.17393	-0.972093	0.273112	0.0349255	-0.553148
AGPS	0.00782665	0.98214	0.00460811	1.0032	Color2 [DarkGray]	1	4		-0.104007	0.37389	-0.0537868	0.0171244	0.454413	0.160145	-0.0304337	-0.332472
HNRNPH1	0.686784	0.205691	-0.171335	0.88802	Color2 [DarkGray]	1	4		-0.0994475	0.100312	0.0884096	0.133543	-0.259017	0.205907	-0.235838	-0.173576
CALU	0.862282	0.137315	-0.303352	0.810368	Color2 [DarkGray]	1	4		0.0861306	0.195089	-0.0598994	0.116178	0.0464135	0.00365327	-0.689501	-0.236475
USP14	0.219586	0.603134	-0.0703279	0.952422	Color2 [DarkGray]	1	4		-0.183259	0.406659	0.0297319	-0.0472969	-0.0515242	0.0459464	-0.0342112	-0.0356877
SERPINF2	0.1937	0.640177	0.338823	1.26472	Color2 [DarkGray]	1	4		0.89309	0.264955	-0.34946	-0.429265	1.96476	-0.407173	-0.706017	0.883046
PLCB3	0.153308	0.702574	-0.102572	0.931371	Color2 [DarkGray]	1	4		-0.33168	0.432182	-0.15211	0.102281	-0.664309	0.0617323	0.0361072	0.206855
VWF	0.517526	0.303721	-0.310677	0.806263	Color2 [DarkGray]	1	4		-0.087634	-0.0634382	0.79332	0.0344883	0.109615	-0.585126	0.188893	-0.279354
RPS2	0.0348348	0.922922	-0.0194506	0.986608	Color2 [DarkGray]	1	4		-0.284946	0.0809735	0.205958	-0.232848	-0.528417	0.0483216	0.0503972	0.121033
PRRC2C	0.15897	0.693474	-0.105984	0.929171	Color2 [DarkGray]	1	4		0.153073	-0.15657	-0.0242234	-0.0114881	-0.811189	0.366985	-0.00511272	-0.01383
HNRNPC	0.428213	0.373067	-0.179983	0.882713	Color2 [DarkGray]	1	4		0.181585	-0.0350581	-0.0269863	0.0259847	-0.668719	0.149126	-0.00455337	-0.0502624
SERPINB13	0.0591975	0.872574	0.121742	1.08805	Color2 [DarkGray]	1	4		-0.715085	0.0530431	0.23511	-0.0823574	-0.955292	0.180395	1.89438	-1.1418
C1S	0.230112	0.588692	0.493873	1.40822	Color2 [DarkGray]	1	4		0.0631449	0.957663	-0.17142	-0.063722	3.0176	-0.565126	-0.397068	0.705758
NID2	0.431849	0.369956	-0.247141	0.842564	Color2 [DarkGray]	1	4		0.456329	-0.557907	0.0968096	0.487413	-0.0812581	-0.310876	-0.172259	0.0584719
PPP1R13L	0.0901933	0.812469	0.0597803	1.04231	Color2 [DarkGray]	1	4		0.128439	-0.151404	-0.131035	0.28568	-0.32924	0.347027	0.568376	-0.215361
SPAG9	0.651626	0.223036	-0.270108	0.829257	Color2 [DarkGray]	1	4		0.224313	0.17876	-0.344003	0.290064	-0.577643	0.0379886	-0.101066	-0.0905798
RACK1	0.23058	0.588058	0.0598087	1.04233	Color2 [DarkGray]	1	4		-0.169237	0.00893823	0.0919415	-0.14745	-0.185794	0.181549	0.103754	-0.0760813
DUOX1	0.147106	0.712679	0.142938	1.10415	Color2 [DarkGray]	1	4		0.212006	0.0212657	0.402659	-0.0573212	0.0120603	-0.0823219	1.35049	-0.129865
EIF5A	0.217183	0.60648	-0.0963936	0.935368	Color2 [DarkGray]	1	4		-0.0504285	0.0962551	0.0133269	-0.119825	-0.602623	0.123111	0.12432	-0.0910533
ESD	0.190582	0.64479	-0.112555	0.924948	Color2 [DarkGray]	1	4		-0.358455	0.0108985	0.146445	0.0127954	-0.728557	-0.00741592	0.237051	-0.139616
TMOD3	0.446896	0.357358	-0.165617	0.891547	Color2 [DarkGray]	1	4		-0.0196811	0.267714	0.0245793	0.0921116	-0.350018	-0.0319494	0.340834	-0.25661
ANXA4	0.0962344	0.801246	0.0593064	1.04196	Color2 [DarkGray]	1	4		-0.439751	0.135777	0.0930555	0.0357056	0.536268	-0.0485226	-0.123773	-0.301959
DDX46	0.178952	0.662289	-0.0372862	0.974486	Color2 [DarkGray]	1	4		0.0257639	-0.0108705	-0.038883	0.0536162	-0.233328	-0.0742412	0.101809	0.0862417
CALM2	0.265334	0.542833	-0.137547	0.909064	Color2 [DarkGray]	1	4		-0.557311	0.3837	0.177609	0.0788329	-0.297283	-0.0710655	-0.113728	0.0147198
ABCE1	0.194853	0.63848	-0.0557649	0.962084	Color2 [DarkGray]	1	4		0.0406969	0.184032	-0.191928	-0.0402843	-0.158808	0.125539	-0.224005	0.0267315
SLC25A13	0.430134	0.371421	0.155279	1.11364	Color2 [DarkGray]	1	4		-0.521458	0.0471446	-0.0892809	0.03502	0.192173	-0.0455093	-0.197862	0.143738
40057	0.575889	0.265529	-0.229985	0.852644	Color2 [DarkGray]	1	4		0.392161	-0.0035847	-0.0178475	0.240154	-0.511195	0.240252	0.0388545	-0.0769686
FERMT1	0.0625712	0.865822	0.0737877	1.05248	Color2 [DarkGray]	1	4		0.123174	0.688263	-0.453456	-0.130257	0.753086	-0.100794	-0.729948	0.600531
GOLGA4	0.0840835	0.82398	-0.031016	0.978731	Color2 [DarkGray]	1	4		0.0541416	-0.159844	0.0503193	-0.0419848	-0.369408	0.0311312	0.218737	-0.101892
TPM3	0.615207	0.242545	-0.182388	0.881243	Color2 [DarkGray]	1	4		0.253232	-0.0436358	0.14719	0.0159219	-0.266788	0.233811	-0.0242112	-0.299656
SRP68	1.0858	0.0820737	-0.164975	0.891944	Color2 [DarkGray]	1	4		0.0724825	0.0851919	-0.021017	-0.0146616	-0.208682	0.037276	-0.29696	-0.069537
GOLGA3	0.332578	0.464967	-0.0971963	0.934848	Color2 [DarkGray]	1	4		0.197603	-0.148354	-0.0111059	-0.0201306	-0.328824	0.163364	-0.142947	-0.0623655
CORO1C	1.59874	0.0251919	-0.396695	0.759596	Color2 [DarkGray]	1	4		0.125445	0.326562	-0.0570835	0.198808	-0.458593	0.0507044	-0.27606	-0.309102
RPL7A	0.333421	0.464066	-0.147431	0.902856	Color2 [DarkGray]	1	4		0.0621928	-0.174191	0.0408616	-0.0243836	-0.708697	0.0183637	0.0632097	-0.0581228
RECQL	1.20843	0.0618825	-0.265476	0.831924	Color2 [DarkGray]	1	4		0.161927	0.0735702	0.00709504	-0.0430986	-0.290754	0.0987645	-0.382606	-0.287814
AKR1A1	0.248368	0.564459	-0.0412736	0.971797	Color2 [DarkGray]	1	4		-0.0818793	-0.0282586	0.102164	0.0881555	-0.0701325	-0.123906	0.111463	-0.00233759
HDGF	0.509685	0.309253	-0.29981	0.812359	Color2 [DarkGray]	1	4		0.127604	-0.264393	-0.0589634	0.152005	-1.03179	0.084568	-0.276284	-0.0194802
CAPZA1	0.923871	0.11916	-0.164893	0.891994	Color2 [DarkGray]	1	4		-0.0408562	0.171178	0.125117	0.327278	-0.0697609	-0.0340009	0.125486	-0.0985818
PTPRC	0.221076	0.601068	-0.203582	0.868392	Color2 [DarkGray]	1	4		-0.0773347	-0.0313755	0.226712	0.00417554	0.613976	-0.527941	-0.997583	0.219399
PDLIM5	0.128104	0.744554	-0.081455	0.945104	Color2 [DarkGray]	1	4		0.173069	-0.126352	-0.024631	0.00422064	-0.672113	0.0193744	0.44615	-0.0929251
LAMB2	0.0959177	0.80183	-0.112601	0.924919	Color2 [DarkGray]	1	4		0.226163	-1.08293	0.807037	0.0877872	-0.306636	-0.311038	0.384401	-0.179075
SPAG9	0.235859	0.580953	-0.149074	0.901829	Color2 [DarkGray]	1	4		0.527659	0.0180242	-0.240915	0.604732	0.0154215	-0.0992844	-0.135954	0.533019
IDE	0.372297	0.424329	0.123034	1.08902	Color2 [DarkGray]	1	4		-0.41857	-0.0178477	-0.110477	0.0621231	-0.236658	0.0214451	0.240222	-0.0176464
HNRNPC	0	1	NaN	#VALUE!	Color2 [DarkGray]	1	4		NaN	NaN	NaN	NaN	NaN	NaN	NaN	NaN
TOP1	0.62503	0.237121	-0.390182	0.763034	Color2 [DarkGray]	1	4		0.0144397	0.532342	-0.329984	0.2041	-0.62592	0.0166692	-0.745723	0.215144
DTX3L	0.125891	0.748358	-0.0795796	0.946333	Color2 [DarkGray]	1	4		0.0786198	0.45466	-0.00119285	-0.0345985	-0.160552	0.654213	-0.043248	-0.271244
EIF2S3	0.21239	0.613211	-0.0944902	0.936603	Color2 [DarkGray]	1	4		0.111711	0.188478	-0.0181393	-0.024262	-0.475384	0.336004	0.0782261	-0.0590194
COL17A1	0.0974918	0.798929	-0.135407	0.910413	Color2 [DarkGray]	1	4		0.672015	0.026839	-0.694303	0.162188	-0.856559	1.08705	-0.509493	-0.0958852
PSMA1	0.224218	0.596736	-0.121993	0.918917	Color2 [DarkGray]	1	4		0.0398652	0.456357	-0.0340868	0.189324	-0.289046	0.584545	-0.0181362	-0.113875
WASHC2C	0.451819	0.35333	0.52357	1.43751	Color2 [DarkGray]	1	4		-1.02183	0.580532	-0.361238	0.236997	-0.0970019	0.000718708	0.0989891	1.52603
EIF2S1	0.0530429	0.885028	0.0305312	1.02139	Color2 [DarkGray]	1	4		0.287621	-0.0613273	-0.169075	-0.152108	-0.472572	0.333831	0.142837	0.0231401
ADAR	0.265159	0.543051	-0.103724	0.930627	Color2 [DarkGray]	1	4		-0.108588	0.3297	-0.0136553	0.170456	-0.152869	0.366793	-0.18741	-0.0634988
FAM83B	0.0322247	0.928486	0.0251961	1.01762	Color2 [DarkGray]	1	4		0.0553438	-0.19748	-0.0501488	0.186208	-0.561387	0.148512	0.658026	-0.150443
PML	0.548015	0.28313	0.295387	1.22721	Color2 [DarkGray]	1	4		-0.624083	0.417178	-0.29005	-0.0575298	0.301761	0.424998	-0.0738055	-0.0258928
SRRM2	0.03514	0.922274	0.0205022	1.01431	Color2 [DarkGray]	1	4		0.0233845	-0.276828	-0.0173641	9.54472e-05	-0.592841	0.140668	0.00716178	0.256308
PSMD6	0.4101	0.388956	0.0829771	1.0592	Color2 [DarkGray]	1	4		-0.234409	0.181647	-0.02264	-0.118547	0.0475789	0.0707745	0.0127105	0.00689616
NAT10	0.473068	0.336459	0.133032	1.0966	Color2 [DarkGray]	1	4		0.0957173	-0.086207	0.0247484	-0.127414	-0.000906117	0.262208	-0.163149	0.340819
PAICS	0.0913871	0.810238	0.0688501	1.04888	Color2 [DarkGray]	1	4		-0.646947	0.401357	-0.00569543	-0.0300219	-0.484547	0.277057	0.0274616	0.174122
MYO5A	0.333642	0.463829	-0.118523	0.92113	Color2 [DarkGray]	1	4		0.202542	0.0714214	-0.00844944	-0.0272367	-0.339219	-0.103627	0.337424	-0.130392
MYO1D	0.220771	0.601491	0.0872167	1.06232	Color2 [DarkGray]	1	4		-0.15431	0.050984	0.00418291	-0.0401005	-0.133666	-0.250281	0.170853	0.422717
ARHGAP1	0.789065	0.16253	0.16481	1.12102	Color2 [DarkGray]	1	4		0.0610824	-0.232858	-0.0561937	-0.199459	0.126716	-0.168581	0.186444	0.0872325
FERMT3	0.0937227	0.805893	-0.107278	0.928338	Color2 [DarkGray]	1	4		0.30705	0.219118	-0.116811	-0.23295	1.02343	-0.623585	-0.685509	0.0329647
STOM	0.102375	0.789997	0.160735	1.11786	Color2 [DarkGray]	1	4		0.713325	-0.311909	-0.144508	0.0982037	1.58676	-0.943692	-0.114442	0.469423
CUL4B	0.367861	0.428686	0.175249	1.12916	Color2 [DarkGray]	1	4		0.0960781	-0.417831	-0.0722575	-0.29587	-0.509542	0.148869	0.144733	0.227054
SUPT16H	0.290377	0.512416	-0.121744	0.919076	Color2 [DarkGray]	1	4		-0.115384	0.179024	-0.0722473	0.034419	-0.324118	0.126632	-0.458008	0.194332
PABPC4	0.485241	0.327159	0.261021	1.19833	Color2 [DarkGray]	1	4		0.0575271	-0.337631	-0.0391014	-0.185978	0.752912	0.0335156	-0.350654	0.103127
SERPINB13	0.143031	0.719397	-0.331105	0.794927	Color2 [DarkGray]	1	4		-0.321946	0.0818252	0.226681	-0.114327	-1.66854	0.167803	1.87045	-1.8219
NARS	0.0645309	0.861924	0.0482665	1.03402	Color2 [DarkGray]	1	4		-0.449722	-0.151813	0.219658	-0.0671337	-0.742934	0.126525	0.13498	0.225484
CBR1	0.0635948	0.863784	-0.0362756	0.975169	Color2 [DarkGray]	1	4		-0.118441	-0.0111604	-0.0102834	0.139777	-0.557575	-0.0716977	0.366119	0.117944
SEC24C	0.238147	0.577901	-0.0557276	0.962109	Color2 [DarkGray]	1	4		0.0552305	-0.0320383	0.0184992	-0.0184737	-0.00181806	0.036868	0.0877775	-0.32252
NUP133	0.530853	0.294542	0.135946	1.09881	Color2 [DarkGray]	1	4		-0.0192606	0.0457812	-0.0227476	-0.0677038	0.247594	0.0175129	-0.151983	0.366731
RPL10A	0.278248	0.526929	-0.15378	0.898892	Color2 [DarkGray]	1	4		-0.0496783	-0.222634	0.126812	0.0470408	-0.824559	0.0937349	0.00627094	0.0109748
RPS3A	0.175187	0.668057	-0.0840106	0.943431	Color2 [DarkGray]	1	4		0.289566	-0.186914	0.0301387	-0.0672617	-0.467023	0.119042	0.234781	-0.157314
IGF2R	2.06644	0.00858142	-0.274075	0.82698	Color2 [DarkGray]	1	4		0.252721	0.180521	0.0174327	0.148591	-0.26954	-0.024662	-0.107496	-0.0953384
KIAA1217	0.724576	0.188549	-0.329382	0.795877	Color2 [DarkGray]	1	4		0.0989878	-0.0885167	0.0770308	0.0845525	-0.501218	-0.46835	0.365087	-0.540993
MYH1	0.501476	0.315155	0.502199	1.41637	Color2 [DarkGray]	1	4		-0.138136	-0.427503	0.308075	-0.109905	0.12432	1.2971	-0.663454	0.883363
HNRNPA3	0.0215368	0.951619	0.0123795	1.00862	Color2 [DarkGray]	1	4		-0.43598	0.140652	0.0296315	-0.0667215	-0.482366	0.16655	-0.108283	0.141199
S100A9	0.359541	0.436977	0.234822	1.17676	Color2 [DarkGray]	1	4		-0.246523	0.0501185	-0.036532	-0.0609313	0.428756	-0.501026	0.758623	-0.0409326
P4HA1	0	1	NaN	#VALUE!	Color2 [DarkGray]	1	4		NaN	NaN	NaN	NaN	NaN	NaN	NaN	NaN
MYO6	0.733471	0.184726	-0.354754	0.782003	Color2 [DarkGray]	1	4		-0.0773449	0.43933	0.0770682	0.414665	-0.297879	-0.265237	0.445522	-0.447705
PSMC6	0.308696	0.491252	-0.0448705	0.969377	Color2 [DarkGray]	1	4		-0.00399915	0.0501504	-0.03021	0.0792292	-0.1533	0.116538	-0.000451611	-0.0470978
GFPT1	0.0919831	0.809127	0.0646266	1.04581	Color2 [DarkGray]	1	4		-0.0308958	0.295006	-0.0312425	-0.00458977	0.689935	-0.0857495	-0.432546	0.315145
FAM120A	0.259193	0.550563	-0.12472	0.917182	Color2 [DarkGray]	1	4		0.0366841	-0.0040464	-0.227615	0.0668327	-0.613899	0.196789	0.0875771	-0.297492
PPP1R12A	0.815207	0.153036	-0.113872	0.924105	Color2 [DarkGray]	1	4		0.060412	0.0814964	-0.057264	0.108438	-0.230414	0.0214428	0.0201366	-0.0735707
ECM1	0.331074	0.46658	-0.392646	0.761731	Color2 [DarkGray]	1	4		-0.551463	1.57745	0.151741	0.0775512	-0.478334	-0.252579	0.582813	-0.1672
POR	0.395167	0.402562	0.143543	1.10461	Color2 [DarkGray]	1	4		-0.401545	0.061553	0.0294751	-0.066555	0.229649	-0.082955	0.269103	-0.218697
TRIP12	0.466827	0.341329	0.112285	1.08094	Color2 [DarkGray]	1	4		-0.137053	0.0598692	-0.184994	-0.0833116	-0.246997	0.0701522	0.192423	0.0880713
COPG2	0.0693667	0.85238	-0.0243267	0.983279	Color2 [DarkGray]	1	4		-0.11257	0.154981	0.141362	-0.205404	0.0677637	-0.288087	0.0616359	0.0397496
NMT1	0.348851	0.447867	-0.204015	0.868131	Color2 [DarkGray]	1	4		-0.117881	-0.036419	0.278425	0.0090312	-0.770728	0.308191	-0.300794	0.0804275
GNB2	1.1378	0.0728111	0.296938	1.22853	Color2 [DarkGray]	1	4		-0.368853	-0.157351	0.0578052	-0.211838	0.144373	-0.0135118	0.415554	-0.0389
ITGA2	0.758866	0.174234	0.444582	1.36092	Color2 [DarkGray]	1	4		-0.293601	0.0154977	-0.460038	0.0770271	1.01803	0.208807	0.0677029	-0.177328
PPP1CB	0.229165	0.589977	0.105761	1.07606	Color2 [DarkGray]	1	4		-0.321541	0.187207	0.0269683	-0.0638901	-0.233911	0.158247	0.447525	-0.120074
BCAP31	0.371367	0.425239	0.162597	1.1193	Color2 [DarkGray]	1	4		0.387654	-0.0618464	-0.149591	-0.050717	-0.0814086	0.609765	0.119404	0.128129
TTR	0.528436	0.296186	0.635759	1.55376	Color2 [DarkGray]	1	4		-0.0954919	-0.297729	0.407916	-0.401448	1.82714	-0.673924	0.197744	0.805326
EPS8L2	0.129887	0.741503	-0.124414	0.917377	Color2 [DarkGray]	1	4		-0.181482	0.0631108	0.606192	0.0530988	-0.421767	-0.0629273	0.935227	-0.407268
EIF4A2	0.89292	0.127962	-0.239639	0.846957	Color2 [DarkGray]	1	4		0.115854	-0.0560455	0.0433082	0.531879	-0.00347789	-0.125039	-0.175378	-0.0196652
H2AFY	1.01959	0.0955903	-0.27348	0.827321	Color2 [DarkGray]	1	4		0.0195537	-0.00464766	0.211235	0.141098	-0.546048	0.0541581	-0.0853071	-0.149485
IFIT3	0.12813	0.744509	-0.269338	0.8297	Color2 [DarkGray]	1	4		0.140994	1.47051	-0.223617	-0.151173	0.401605	1.81772	-0.931526	-1.12844
EIF3M	0.868017	0.135514	0.322866	1.25081	Color2 [DarkGray]	1	4		-0.704308	0.0192841	-0.0411722	-0.0560937	-0.0687665	0.279621	0.22026	0.0780614
37500	0.408109	0.390743	-0.155069	0.898089	Color2 [DarkGray]	1	4		0.0694522	-0.235944	0.129937	0.0868637	-0.54036	0.103686	0.0398615	-0.173154
ASPH	0.560274	0.275249	-0.1664	0.891063	Color2 [DarkGray]	1	4		-0.191483	0.0606064	0.0769788	0.414417	-0.0582887	0.0857454	-0.200413	-0.132126
P4HA1	0.251391	0.560543	-0.157922	0.896315	Color2 [DarkGray]	1	4		-0.0383585	0.148399	-0.142157	0.220743	0.0973112	0.474388	-0.4577	-0.55706
YWHAB	0.118003	0.762074	0.061127	1.04328	Color2 [DarkGray]	1	4		-0.430866	0.00644268	-0.0279829	0.180194	-0.401758	0.114949	-0.00853966	0.267644
COPS4	1.02414	0.0945943	-0.171079	0.888178	Color2 [DarkGray]	1	4		0.244823	-0.020492	0.0800158	0.0492161	-0.255751	0.0240426	0.0130006	-0.112045
HNRNPH2	0.128108	0.744547	0.0562754	1.03978	Color2 [DarkGray]	1	4		0.210859	0.0470552	-0.0705294	-0.205404	-0.0567485	0.180655	-0.277773	0.360949
ERC1	0.28647	0.517047	-0.224836	0.855692	Color2 [DarkGray]	1	4		0.221408	-0.358829	-0.0255416	-0.0101873	-1.15085	-0.190702	0.120936	0.148124
RTN4	0.237216	0.57914	-0.159439	0.895373	Color2 [DarkGray]	1	4		-0.0623722	0.0727051	-0.318587	0.193001	-0.709981	0.299671	0.169552	-0.512251
CD109	0.0973068	0.799269	-0.11123	0.925798	Color2 [DarkGray]	1	4		-0.548428	-0.151381	0.863437	0.11134	-0.665277	0.289368	0.601951	-0.395994
APOH	0.669056	0.214261	0.816538	1.76118	Color2 [DarkGray]	1	4		-0.0904122	-0.017655	-0.00386127	-0.0818126	2.46799	-0.23755	0.4383	0.403667
SLC25A24	0.0397511	0.912534	0.02443	1.01708	Color2 [DarkGray]	1	4		-0.106462	0.361615	-0.0793422	0.161982	0.650539	-0.127852	-0.0866285	-0.000544858
EIF3L	0.311791	0.487763	0.167094	1.12279	Color2 [DarkGray]	1	4		-0.710261	0.0731119	-0.0358392	-0.000108009	-0.308651	0.193649	0.250994	-0.140714
MAPRE1	0.56083	0.274897	-0.259217	0.835541	Color2 [DarkGray]	1	4		0.0054474	0.135203	-0.0654516	0.234691	-0.789349	0.0255233	-0.0615259	0.0983743
UTRN	0	1	NaN	#VALUE!	Color2 [DarkGray]	1	4		NaN	NaN	NaN	NaN	NaN	NaN	NaN	NaN
DCN	0.0917068	0.809642	0.21456	1.16035	Color2 [DarkGray]	1	4		0.454526	-1.73802	1.68045	-0.308525	-0.116524	0.151261	1.53865	-0.626716
UBA2	0.381516	0.415416	-0.141391	0.906645	Color2 [DarkGray]	1	4		0.0977703	-0.0374042	-0.034563	0.0565117	-0.471183	0.27425	-0.243467	-0.0428471
TALDO1	0.483683	0.328335	-0.190862	0.876082	Color2 [DarkGray]	1	4		0.196564	-0.3641	0.121686	0.182543	-0.487483	-0.141234	-0.0771616	0.0791211
AGRN	0.381889	0.41506	0.233246	1.17548	Color2 [DarkGray]	1	4		-0.297747	0.017113	-0.174832	-0.0442688	0.751448	0.15789	-0.499787	0.0236975
ARHGEF1	0.245164	0.568638	-0.159868	0.895107	Color2 [DarkGray]	1	4		-0.095481	0.940417	-0.0982269	0.170075	0.359516	0.0424152	-0.0294218	-0.0951981
DIS3	0.220599	0.601729	0.13235	1.09608	Color2 [DarkGray]	1	4		0.0776299	0.0249856	-0.047105	0.11846	-0.10023	-0.0255332	-0.0582111	0.887346
CAPG	0.0904644	0.811962	-0.0903111	0.93932	Color2 [DarkGray]	1	4		-0.0259285	0.343491	0.102117	-0.0260715	0.931491	-0.250629	0.0953566	-0.743855
NUCB1	0.0534662	0.884166	-0.0293381	0.97987	Color2 [DarkGray]	1	4		-0.061295	-0.119657	0.09734	0.164118	-0.427116	0.0558954	0.443816	-0.109442
UTRN	0.318516	0.480268	-0.19259	0.875033	Color2 [DarkGray]	1	4		0.187795	-0.357133	0.407143	0.164609	-0.231409	-0.380182	0.494041	-0.250398
SERPINB2	0.102279	0.790171	0.166994	1.12272	Color2 [DarkGray]	1	4		-0.395601	1.77733	-0.566006	-0.0621436	1.11184	0.0504369	-0.0405506	0.299827
NUP93	0.210614	0.615723	0.0254472	1.0178	Color2 [DarkGray]	1	4		-0.0036853	0.0614956	-0.0729479	0.00394436	0.134446	-0.0434198	-0.0195353	0.0191042
HLA-A	0.132557	0.736959	0.134523	1.09773	Color2 [DarkGray]	1	4		0.345836	-0.290442	0.105374	-0.726147	0.352345	0.505066	-0.0417197	-0.842978
RPS6KA1	0.131907	0.738062	0.0923226	1.06609	Color2 [DarkGray]	1	4		-0.0974182	0.38478	0.00407384	-0.0399886	0.757609	-0.270569	-0.188335	0.322032
LARP1	0.105185	0.784901	0.0589497	1.04171	Color2 [DarkGray]	1	4		-0.538692	0.14213	-0.0240641	-0.0116455	-0.476535	0.143058	0.0606503	0.0763542
CA1	0.48168	0.329853	0.791782	1.73121	Color2 [DarkGray]	1	4		0.368395	-0.244783	-1.12314	-0.0223565	1.49806	-1.08664	1.79396	-0.0601418
RPSA	0.886601	0.129837	0.334393	1.26085	Color2 [DarkGray]	1	4		-0.618662	-0.0408362	0.0186002	-0.228504	-0.212023	0.1882	0.389475	0.102517
PSMD5	0.956279	0.110591	-0.180087	0.88265	Color2 [DarkGray]	1	4		-0.132655	0.0432343	0.253751	0.203573	-0.121578	-0.0413042	-0.185234	-0.00432738
COPS2	0.17101	0.674512	-0.062485	0.957613	Color2 [DarkGray]	1	4		-0.190997	-0.0682973	0.0984768	0.109286	-0.406672	0.176509	-0.0687805	-0.00252812
PPP1CA	1.02675	0.0940259	0.353054	1.27726	Color2 [DarkGray]	1	4		-0.636873	0.177181	-0.269808	-0.38621	0.00970699	0.139123	0.179876	-0.032199
TOM1	0.0966219	0.800531	0.0744145	1.05293	Color2 [DarkGray]	1	4		-0.424129	-0.278654	0.100968	0.117074	-0.666685	-0.0768658	0.536569	0.0198997
APEH	0.0553941	0.88025	-0.0308131	0.978868	Color2 [DarkGray]	1	4		-0.294087	0.298508	0.220585	-0.205924	-0.0045431	-0.392432	0.13314	0.159666
PRMT1	0.25133	0.560622	0.0870696	1.06221	Color2 [DarkGray]	1	4		-0.475636	0.143257	-0.0440448	-0.00746907	0.0962321	-0.00318786	-0.137605	0.0089466
LRP1	0.500512	0.315855	-0.279435	0.823914	Color2 [DarkGray]	1	4		-0.230978	0.180513	0.798393	0.0352272	-0.183993	-0.324087	0.293456	-0.119962
PTPN6	0.156586	0.697292	-0.180745	0.882247	Color2 [DarkGray]	1	4		0.113491	0.189607	-0.11378	-0.199696	0.84856	-0.660624	-1.09493	0.173632
CLUH	0.167883	0.679386	0.0641304	1.04545	Color2 [DarkGray]	1	4		0.0463798	-0.178695	0.0136093	-0.0461476	-0.350596	-0.0272868	0.250318	0.219232
HNRNPF	0.0242972	0.94559	-0.00856941	0.994078	Color2 [DarkGray]	1	4		0.0824751	-0.0123075	-0.0640219	-0.0144882	-0.34977	0.061017	0.0642255	0.181907
HPR	0.383422	0.413597	0.576739	1.49147	Color2 [DarkGray]	1	4		0.139865	0.496502	-0.452529	-0.14983	1.74426	-0.457029	-0.532754	1.58649
TPM3	0.949581	0.11231	-0.363035	0.777527	Color2 [DarkGray]	1	4		0.441328	0.117813	0.219921	-0.164417	-0.464336	0.0932762	0.00138242	-0.467819
NUP155	0.233557	0.58404	0.0767678	1.05465	Color2 [DarkGray]	1	4		-0.120621	0.0966241	-0.0727911	0.0349218	0.398164	-0.0936811	-0.147773	0.088495
ARPC1B	0.289667	0.513255	-0.102865	0.931182	Color2 [DarkGray]	1	4		-0.112798	0.438551	0.0488065	-0.0519427	-0.0356292	0.0713476	0.120579	-0.245138
HNRNPD	0.453157	0.352243	-0.261846	0.83402	Color2 [DarkGray]	1	4		-0.134974	-0.0968724	0.341353	0.171416	-0.831603	0.254857	-0.212964	0.0232491
STOML2	0.80752	0.155769	-0.227852	0.853905	Color2 [DarkGray]	1	4		0.439102	-0.136502	0.0902635	0.206475	-0.0488192	0.0937461	-0.0959977	-0.260998
TPM2	0.773236	0.168564	-0.490786	0.711637	Color2 [DarkGray]	1	4		-0.0370946	-0.310642	0.560836	0.400239	-0.655202	0.150817	-0.839438	-0.00598562
RTN4	0.171246	0.674146	0.20507	1.15274	Color2 [DarkGray]	1	4		-1.27245	0.463958	0.129596	-0.509592	-0.776854	0.38493	0.246623	-0.222908
PITPNB	0.018622	0.958028	0.0069828	1.00485	Color2 [DarkGray]	1	4		-0.0102511	-0.0518618	-0.00631974	0.260709	-0.144995	0.337421	0.0834612	-0.05568
CTPS1	0.375373	0.421334	0.483719	1.39834	Color2 [DarkGray]	1	4		-0.079668	0.521622	-0.190271	0.0485785	2.13008	0.347144	0.0172534	-0.259344
GBF1	0.1663	0.681867	0.020454	1.01428	Color2 [DarkGray]	1	4		-0.0293912	0.0365689	-0.0585067	0.0140261	0.0370241	0.0223314	0.0929081	-0.10775
GBP5	0.406407	0.392277	-0.742696	0.597622	Color2 [DarkGray]	1	4		0.0445387	2.69009	-0.722949	0.00816854	0.0163895	0.474333	-0.802011	-0.639643
ALDH3A1	0.202034	0.62801	0.41884	1.33685	Color2 [DarkGray]	1	4		0.301133	-1.08528	1.38971	-0.485288	-0.307552	-0.904821	1.59987	1.40813
ACO1	0.669013	0.214282	-0.252813	0.839259	Color2 [DarkGray]	1	4		0.110638	-0.253183	0.43781	0.0657916	-0.407912	-0.269266	0.123903	-0.0969196
PITRM1	1.30823	0.0491774	-0.236155	0.849005	Color2 [DarkGray]	1	4		0.204142	0.122535	0.0343908	0.00605157	-0.0787521	-0.312717	0.0627573	-0.248791
HSD17B12	0.39315	0.404436	0.152691	1.11164	Color2 [DarkGray]	1	4		0.040871	-0.0296614	0.0532234	-0.0404631	0.583731	-0.0241874	-0.183389	0.258581
ARFGEF1	0.171689	0.673458	0.0800667	1.05707	Color2 [DarkGray]	1	4		-0.420435	0.438389	-0.116472	-0.0481085	0.0672241	0.053655	-0.0501612	0.102923
PGM1	1.16887	0.0677837	-0.307509	0.808036	Color2 [DarkGray]	1	4		-0.00353168	0.0944031	0.0987428	0.00379599	-0.130219	-0.613545	-0.308239	0.0153759
PDS5A	0.0683865	0.854306	0.0397525	1.02794	Color2 [DarkGray]	1	4		-0.50636	0.206902	0.367356	-0.204854	-0.0654866	0.108373	-0.129782	0.108949
CUL3	0.331409	0.46622	0.139291	1.10136	Color2 [DarkGray]	1	4		-0.445946	-0.0844394	-0.0105123	0.0582377	-0.279936	0.00530262	0.393198	-0.0440633
IARS2	0.0504305	0.890368	-0.0231227	0.9841	Color2 [DarkGray]	1	4		-0.0049756	0.122919	0.0168851	-0.131086	0.410397	-0.194035	-0.268802	-0.0363076
ACAA1	0.18879	0.647455	-0.0799629	0.946082	Color2 [DarkGray]	1	4		-0.238269	0.176786	0.0784601	-0.0832349	0.157436	-0.00283732	-0.491397	-0.0493112
CAPZB	1.1267	0.0746968	-0.335378	0.792576	Color2 [DarkGray]	1	4		0.219436	-0.00544638	-0.00528541	0.184755	-0.577804	-0.118349	0.08898	-0.340882
ITGB1	1.0235	0.0947328	-0.466402	0.723768	Color2 [DarkGray]	1	4		0.449033	0.149594	-0.189923	0.18301	0.218826	-0.282422	-0.649635	-0.560661
FAM49B	0.424692	0.376104	-0.189331	0.877012	Color2 [DarkGray]	1	4		-0.3431	0.170338	-0.0809179	0.269279	-0.290542	0.0870975	-0.539177	0.000897986
RPS4X	0.296441	0.505311	0.132009	1.09582	Color2 [DarkGray]	1	4		-0.381923	-0.0363921	0.014349	-0.17461	-0.49182	0.213498	0.183936	0.0438443
RTN4	0.658264	0.219653	0.570047	1.48457	Color2 [DarkGray]	1	4		-1.47611	0.360978	-0.110222	-0.363064	0.12932	0.265207	0.496988	-0.199741
PFN1	0.528354	0.296242	-0.188522	0.877504	Color2 [DarkGray]	1	4		-0.266391	0.410881	-0.0278351	0.239784	-0.176361	0.0225299	-0.259452	0.015633
RAB3GAP2	0.16252	0.687829	0.0698413	1.0496	Color2 [DarkGray]	1	4		0.138133	0.00955546	-0.0311582	-0.060561	0.483562	0.148512	-0.0178273	-0.278912
RPS17	0.0124339	0.971776	0.00802663	1.00558	Color2 [DarkGray]	1	4		-0.279379	-0.139874	0.16035	-0.0623026	-0.660093	0.175841	0.130432	0.0647217
FUBP1	0.000317699	0.999269	-0.000196174	0.999864	Color2 [DarkGray]	1	4		0.103441	-0.139982	-0.102393	0.162072	-0.409564	0.435451	-0.204089	0.200555
TMPO	1.211	0.0615179	-0.516616	0.69901	Color2 [DarkGray]	1	4		0.143448	0.0906886	0.198905	-0.0129338	-0.959024	0.00235579	-0.572541	-0.117145
RPL7	0.0112116	0.974515	0.00750133	1.00521	Color2 [DarkGray]	1	4		-0.215215	-0.0178197	0.0232857	-0.091606	-0.678195	0.111779	0.345608	-0.0505404
SPINK5	0.00204299	0.995307	0.00459837	1.00319	Color2 [DarkGray]	1	4		0.711034	-0.472019	1.56449	-0.0204991	-0.318525	0.00996082	2.24918	-0.139213
DDX39A	0.638632	0.229809	0.298476	1.22984	Color2 [DarkGray]	1	4		-0.146451	0.28798	-0.10103	-0.343841	0.761186	0.0212209	0.0784569	0.0296989
ANXA11	0.346619	0.450175	0.234794	1.17674	Color2 [DarkGray]	1	4		-0.022232	-0.0599175	0.0269875	0.13387	1.03429	-0.266567	-0.0751357	0.325297
MCM2	0.0705202	0.850119	-0.0387683	0.973486	Color2 [DarkGray]	1	4		0.090578	0.210236	-0.251642	-0.0934055	-0.032773	0.105848	-0.523484	0.251102
PSME2	0.421031	0.379288	-0.3257	0.797911	Color2 [DarkGray]	1	4		-0.00369073	1.02246	-0.0146526	0.314885	-0.563569	0.617832	0.0244397	-0.0625001
MNDA	0.280104	0.524682	-0.413463	0.750819	Color2 [DarkGray]	1	4		0.673972	-0.559749	-0.0530843	0.0360086	0.931142	-0.764764	-1.69804	-0.0250399
IQGAP2	0.00634946	0.985486	-0.00447624	0.996902	Color2 [DarkGray]	1	4		-0.248474	0.031933	0.170498	-0.0597428	0.281754	-0.337238	-0.472561	0.404354
EML4	0.576885	0.26492	-0.148625	0.90211	Color2 [DarkGray]	1	4		-0.00889816	0.282164	-0.0140856	0.00728465	-0.100801	0.00888985	-0.343839	0.107714
CDC42BPB	0.428769	0.37259	-0.0743583	0.949764	Color2 [DarkGray]	1	4		0.143742	0.0167109	-0.0148201	-0.0336528	-0.208802	-0.0271075	0.112788	-0.0623325
MAPK1	0.260885	0.548422	0.107225	1.07715	Color2 [DarkGray]	1	4		-0.174678	0.074074	-0.0455537	0.23592	0.558737	0.0141431	0.0119723	-0.0661912
BGN	0.157214	0.696283	0.191721	1.14213	Color2 [DarkGray]	1	4		-0.00639877	-1.44231	0.289805	-0.0922625	-0.894069	0.167209	0.277516	-0.0349358
ARPC2	0.150026	0.707903	-0.0598571	0.959359	Color2 [DarkGray]	1	4		-0.202485	0.447987	0.0345055	0.0389575	-0.0287986	0.20267	0.038374	-0.132708
LRRC47	0.621755	0.238916	-0.157093	0.89683	Color2 [DarkGray]	1	4		0.0149704	0.00173787	0.143121	-0.0143165	-0.435916	0.0931114	-0.00920561	-0.130849
SERPING1	0.139237	0.725709	0.318875	1.24736	Color2 [DarkGray]	1	4		0.0148332	1.30995	-0.0777038	-0.0141807	2.92359	-0.566059	-0.357845	0.508706
NME1	0.909289	0.123228	-0.247835	0.842159	Color2 [DarkGray]	1	4		0.128472	0.0219566	-0.0293417	0.0295334	-0.596093	0.0240086	-0.15745	-0.111186
OSBP	0.00201577	0.995369	0.00134851	1.00094	Color2 [DarkGray]	1	4		-0.0807231	-0.120921	0.0504957	0.443826	-0.368925	0.130596	0.0210237	0.515378
HLA-A	0.580652	0.262632	-0.896196	0.537302	Color2 [DarkGray]	1	4		0.290719	2.34662	-0.605765	1.0126	-0.291607	0.948676	-0.519899	-0.677784
EEF1D	0.0408308	0.910268	0.0207285	1.01447	Color2 [DarkGray]	1	4		-0.178413	-0.000325772	-0.189076	0.166816	-0.491564	0.125242	0.0838354	0.164403
PLOD1	0.160316	0.691328	0.133331	1.09682	Color2 [DarkGray]	1	4		-0.0530933	0.0643642	-0.246279	0.2182	0.863503	0.388075	-0.448602	-0.286459
TNPO1	0.604854	0.248397	0.193054	1.14318	Color2 [DarkGray]	1	4		-0.317305	0.228099	-0.0785993	-0.0351459	-0.00314796	0.382482	0.23743	-0.0474973
WDR44	0.0289791	0.935451	0.0265336	1.01856	Color2 [DarkGray]	1	4		-0.0554078	-0.0484887	-0.0799335	0.570572	-0.556118	0.773444	0.130822	0.144729
NSF	0.781176	0.16551	-0.13304	0.911908	Color2 [DarkGray]	1	4		0.0185683	0.000421468	-0.0125493	0.124068	-0.0802905	-0.327329	0.0156288	-0.00966237
PCBP2	0.399558	0.398513	-0.126625	0.915971	Color2 [DarkGray]	1	4		0.248099	-0.0689735	0.0564854	0.00971075	-0.418165	-0.0208951	0.0421775	0.135702
VTN	0.247217	0.565957	0.554532	1.46869	Color2 [DarkGray]	1	4		0.156678	0.355436	-0.7558	-0.170055	2.8511	-0.822929	-0.912646	0.688863
KRT80	0.383239	0.413772	-0.355856	0.781406	Color2 [DarkGray]	1	4		0.119341	1.27511	-0.605369	0.518057	-0.21893	-0.1308	-0.0155254	0.248973
PROS1	0.400983	0.397207	0.888052	1.85067	Color2 [DarkGray]	1	4		0.268016	0.206181	-0.503359	-0.269732	3.35147	-0.601696	-0.722634	1.22617
MMP9	0.545632	0.284687	-0.57064	0.673318	Color2 [DarkGray]	1	4		0.143473	0.0138788	-0.560096	0.778898	0.0196978	-0.284075	-1.65952	0.0174932
CCAR2	0.61556	0.242348	-0.184962	0.879672	Color2 [DarkGray]	1	4		0.174322	0.0183224	0.240373	-0.0455196	-0.38477	-0.1682	-0.01299	0.213608
TPM2	0.000994229	0.997713	0.00115494	1.0008	Color2 [DarkGray]	1	4		0.185432	-0.540164	0.50722	-0.0527685	-0.118576	0.890081	-0.636732	-0.0304333
ARHGDIB	0.41774	0.382173	-0.390068	0.763094	Color2 [DarkGray]	1	4		-0.820262	0.114682	0.129727	0.107693	0.188759	-0.622228	-1.40094	-0.194026
IPO9	0.368821	0.42774	0.0771574	1.05494	Color2 [DarkGray]	1	4		-0.248182	0.145782	-0.010869	-0.0247986	0.0861108	-0.0601506	0.0186333	0.125969
XPOT	0.282009	0.522385	0.10727	1.07719	Color2 [DarkGray]	1	4		-0.335668	0.0820088	-0.0672442	0.073692	0.409596	-0.142363	-0.0736407	-0.0117237
ATP2A3	0.117477	0.762998	-0.15251	0.899684	Color2 [DarkGray]	1	4		-0.0708961	-0.185681	0.175306	0.0660509	0.587111	-0.892573	-1.06349	0.743695
DCTN2	0.450973	0.354019	-0.285028	0.820726	Color2 [DarkGray]	1	4		0.244195	-0.28039	-0.0636647	0.0795852	-1.00363	0.0568917	0.139546	-0.3532
NSFL1C	0.600149	0.251102	0.174567	1.12863	Color2 [DarkGray]	1	4		0.0613684	-0.336689	-0.145654	0.0758982	-0.108321	-0.0313799	0.177969	0.314922
PSMD13	0.00292463	0.993288	-0.00110608	0.999234	Color2 [DarkGray]	1	4		-0.197402	0.311796	-0.0175676	-0.0180913	0.00105112	0.0338604	0.185749	-0.14635
NUDC	0.596509	0.253216	-0.229682	0.852823	Color2 [DarkGray]	1	4		0.0350335	0.0939389	-0.0971714	0.0832488	-0.679015	0.158353	-0.207032	-0.075985
METAP2	0.0391686	0.913758	-0.0279956	0.980782	Color2 [DarkGray]	1	4		-0.415266	0.0739567	0.0721495	-0.059596	-0.700229	0.359796	-0.0763741	-0.0239316
TCOF1	0.73861	0.182553	-0.409064	0.753112	Color2 [DarkGray]	1	4		0.344765	-0.0800101	0.0670608	0.0496533	-1.00994	0.212388	-0.307462	-0.149771
BAIAP2	0.273982	0.53213	-0.169825	0.888951	Color2 [DarkGray]	1	4		0.0312888	-0.317251	-0.00565718	-0.0300605	-0.768683	0.0322294	0.276945	-0.541472
MCM4	0.0321323	0.928683	0.025986	1.01818	Color2 [DarkGray]	1	4		-0.414177	0.278608	-0.17484	0.123259	-0.273564	0.395403	-0.546223	0.341177
VAPA	0.0744622	0.842438	0.0520719	1.03675	Color2 [DarkGray]	1	4		-0.0110527	-0.0530218	0.016372	-0.18979	-0.694299	0.201972	0.455471	0.00765079
SCRIB	0.0201128	0.954745	0.0121076	1.00843	Color2 [DarkGray]	1	4		-0.367728	0.0617842	0.199142	-0.0919246	-0.437779	-0.14288	0.329848	0.100515
SART1	0.624028	0.237669	-0.227806	0.853932	Color2 [DarkGray]	1	4		0.0331565	-0.0406672	-0.0272331	0.123692	-0.629908	0.0733862	-0.328897	0.0631419
FLOT2	0.106258	0.782964	0.105357	1.07576	Color2 [DarkGray]	1	4		0.300012	-0.148505	0.0122723	-0.0484587	1.10826	-0.57844	-0.0335997	0.0405265
AKAP13	0.306832	0.493364	0.14611	1.10658	Color2 [DarkGray]	1	4		-0.609026	-0.0237589	0.277803	-0.00322104	-0.0356981	-0.101809	0.192524	0.171219
THRAP3	0.313125	0.486267	-0.261351	0.834307	Color2 [DarkGray]	1	4		-0.078836	-0.0251669	0.00349544	0.115729	-1.28793	0.22865	-0.0939185	0.12302
MOGS	0.225617	0.594816	0.0817835	1.05833	Color2 [DarkGray]	1	4		0.0253216	0.138079	-0.0193098	-0.0397074	0.475763	-0.0693326	-0.146759	0.171846
TPM1	0.00402309	0.990779	-0.00310976	0.997847	Color2 [DarkGray]	1	4		-0.00959718	-0.281324	-0.122852	0.594004	0.11583	0.460094	-0.376269	-0.031863
HK3	0.0406262	0.910697	-0.0761638	0.948577	Color2 [DarkGray]	1	4		0.273408	0.129617	-0.277204	-0.170531	1.26034	-0.933949	-1.39424	0.718484
RAD50	0.167578	0.679864	0.0497684	1.0351	Color2 [DarkGray]	1	4		0.00737363	0.0018478	0.286788	-0.0286645	-0.0372191	0.268748	-0.0344766	0.269366
CARS	0.472234	0.337105	-0.140844	0.906989	Color2 [DarkGray]	1	4		-0.00209024	0.0166288	0.0756975	0.304887	-0.351373	-0.0241011	0.00258327	0.20464
HIST1H4C	0.49329	0.321152	-0.158561	0.895918	Color2 [DarkGray]	1	4		-0.00785196	0.0221871	0.17305	-0.124869	0.079049	-0.204861	-0.494128	0.0482118
DLD	0.153612	0.702082	0.0577633	1.04085	Color2 [DarkGray]	1	4		-0.390512	-0.0814496	0.185449	0.0950031	0.093272	0.156541	-0.0931022	-0.117168
AGL	0.299426	0.50185	0.115428	1.0833	Color2 [DarkGray]	1	4		-0.314392	-0.286236	0.0698003	-0.0554526	0.215747	0.0440876	-0.406728	0.022327
STXBP2	0.332697	0.46484	-0.110436	0.926308	Color2 [DarkGray]	1	4		0.184982	0.305352	-0.0605185	0.0234808	0.34341	-0.10871	-0.0595332	-0.163617
ATAD3A	0.116643	0.764464	0.0283811	1.01987	Color2 [DarkGray]	1	4		0.0255951	-0.0277742	-0.019585	-0.0276311	0.17706	0.0850764	-0.238965	0.0409575
TTLL12	0.032559	0.927771	0.0148985	1.01038	Color2 [DarkGray]	1	4		-0.05829	0.0690482	0.111303	-0.293672	-0.118598	-0.333676	0.266382	0.073875
TAP1	0.131501	0.738753	-0.146442	0.903476	Color2 [DarkGray]	1	4		-0.0624737	1.38349	-0.2165	0.0585683	0.532564	0.444621	-0.214879	-0.184989
ARF3	0.633023	0.232797	0.439664	1.35629	Color2 [DarkGray]	1	4		-1.26555	-0.0097311	-0.131371	-0.0170478	0.420139	0.0217908	-0.212016	0.105046
PSAP	1.15635	0.0697666	-0.29398	0.815649	Color2 [DarkGray]	1	4		-0.0535883	0.0648115	0.302365	0.0902887	-0.322804	0.10977	-0.169405	-0.389603
ALDH18A1	0.206164	0.622066	-0.122156	0.918814	Color2 [DarkGray]	1	4		0.43457	-0.288733	-0.0312786	0.146911	0.369201	-0.0416267	-0.508677	-0.0460522
EIF2S2	0.00395191	0.990942	-0.00263804	0.998173	Color2 [DarkGray]	1	4		-0.207264	0.100674	-0.0208543	-0.109332	-0.661255	0.302738	0.167509	-0.0563207
CLIC1	0.106757	0.782065	-0.0618806	0.958014	Color2 [DarkGray]	1	4		-0.42462	0.333804	-0.108252	0.109031	0.122147	-0.0769975	-0.482906	0.100197
FARSB	0.0872063	0.818076	0.0573113	1.04052	Color2 [DarkGray]	1	4		-0.641388	0.094176	0.0547032	-0.184393	-0.615402	0.0746583	0.0220703	0.0710169
YBX1	0.214658	0.610017	-0.23545	0.84942	Color2 [DarkGray]	1	4		-0.280839	-0.142439	0.109261	0.55428	-1.2186	0.610433	-0.32647	0.233101
GRN	0.0197313	0.955584	-0.00873821	0.993961	Color2 [DarkGray]	1	4		0.0373795	-0.0491389	0.104076	-0.0368833	0.161031	-0.195933	0.336558	-0.281175
TPM3	0	1	NaN	#VALUE!	Color2 [DarkGray]	1	4		NaN	NaN	NaN	NaN	NaN	NaN	NaN	NaN
EIF5	0.126731	0.746912	-0.0529638	0.963954	Color2 [DarkGray]	1	4		0.0862224	-0.0220291	0.00043144	-0.216231	-0.506604	0.0412583	-0.0365051	0.138389
MCM3	0.496176	0.319024	-0.156095	0.897451	Color2 [DarkGray]	1	4		-0.011251	0.335006	-0.0463645	0.0100488	-0.33309	0.127903	-0.217852	0.086097
FKBP15	0.533343	0.292858	-0.128072	0.915054	Color2 [DarkGray]	1	4		0.047012	0.198219	-0.186737	-0.0143064	-0.32037	0.00374144	-0.155383	0.00391331
DDX6	0.987789	0.102852	0.161554	1.11849	Color2 [DarkGray]	1	4		-0.189989	-0.188508	0.137515	-0.0266054	0.0281873	0.0782484	0.0958862	0.176308
ALDH9A1	0.0110066	0.974975	0.0119624	1.00833	Color2 [DarkGray]	1	4		-0.486291	-0.325347	0.801269	0.37195	-0.241434	-0.0479524	0.705137	-0.00631887
ANKFY1	0.597792	0.252469	-0.172494	0.887308	Color2 [DarkGray]	1	4		-0.12609	0.336127	0.0444858	0.0117413	0.00715596	0.0982978	-0.312978	-0.216186
RAB3GAP1	0.469973	0.338866	0.0938123	1.06719	Color2 [DarkGray]	1	4		0.0385168	-0.0874151	-0.032704	-0.119323	-0.177284	0.0773016	0.226781	0.0475262
SPINK5	0.169351	0.677094	-0.379984	0.768446	Color2 [DarkGray]	1	4		0.780338	-0.828182	1.3806	0.122825	-1.4905	-0.347225	1.99452	-0.221147
ACIN1	0.627781	0.235624	-0.315585	0.803525	Color2 [DarkGray]	1	4		0.115773	-0.169461	0.0142499	0.155714	-0.949998	0.0838356	-0.187886	-0.0920142
HNRNPD	0.301669	0.499265	-0.413557	0.75077	Color2 [DarkGray]	1	4		1.09111	-0.425449	0.536821	-0.348641	-1.15586	0.277123	0.786531	-0.70818
HCFC1	0.59965	0.251391	-0.115833	0.922849	Color2 [DarkGray]	1	4		0.00527417	-0.0664158	0.0288913	-0.0047674	-0.326807	0.0283877	-0.222609	0.0206775
DSG2	0.440167	0.362938	-0.280358	0.823386	Color2 [DarkGray]	1	4		0.0695992	0.452443	-0.0652572	0.0596636	-0.348754	0.626407	-0.368402	-0.514237
GOLGA2	0.188184	0.64836	-0.102723	0.931274	Color2 [DarkGray]	1	4		0.0301348	-0.189553	-0.12138	0.00831645	-0.790221	0.00383922	0.0959014	0.00710856
CDH1	0.0347708	0.923059	0.0355586	1.02495	Color2 [DarkGray]	1	4		-0.314983	-0.252271	0.0689434	0.0804485	-0.980278	-0.0793457	0.626367	0.157629
ACOX1	0.0877589	0.817036	0.072772	1.05174	Color2 [DarkGray]	1	4		0.212911	-0.051224	0.00700604	-0.0430065	0.64779	-0.563274	0.548831	-0.216574
NCBP1	0.0700281	0.851083	0.0467282	1.03292	Color2 [DarkGray]	1	4		-0.684875	0.169464	-0.133401	0.222702	-0.138112	0.194432	-0.342804	0.0472869
MYH7	0.141452	0.722018	0.113885	1.08214	Color2 [DarkGray]	1	4		0.0299915	-0.563994	0.796262	-0.0674121	0.0312672	0.309521	-0.102138	0.411738
S100A7	0.241086	0.574003	0.410846	1.32946	Color2 [DarkGray]	1	4		1.43894	-0.876667	-0.187067	0.00896472	0.0100553	-0.634764	1.3738	1.27847
GNB1	0.032694	0.927483	-0.0132627	0.990849	Color2 [DarkGray]	1	4		-0.383829	0.0109824	0.160285	0.0579871	0.117514	-0.00750166	-0.0870276	-0.23061
TPM2	0.768896	0.170257	-0.431942	0.741263	Color2 [DarkGray]	1	4		-0.0719865	-0.207792	0.362638	0.223269	-0.764678	0.0974736	-0.791088	0.0366526
VAPA	0.0394034	0.913265	-0.0377349	0.974183	Color2 [DarkGray]	1	4		0.243773	0.40489	-0.0151558	-0.444478	-0.528733	-0.266933	0.0898057	0.74395
SDHA	0.139817	0.724741	-0.0966198	0.935222	Color2 [DarkGray]	1	4		0.0141269	0.212518	-0.00813748	-0.0612383	0.465685	-0.0898666	-0.741001	0.135972
PARK7	0.612749	0.243922	-0.304808	0.80955	Color2 [DarkGray]	1	4		0.0655844	-0.226003	0.0853029	0.019768	-0.965203	-0.0314625	-0.281516	0.0035994
RAP1GDS1	0.850269	0.141166	-0.259139	0.835586	Color2 [DarkGray]	1	4		0.0804553	0.327708	-0.0769719	0.359889	-0.261634	0.184714	0.0107116	-0.279267
AMY1C	0.16237	0.688066	0.200241	1.14889	Color2 [DarkGray]	1	4		-0.522096	0.187001	-0.765324	-0.0545914	0.477665	0.0432663	-1.32177	0.446794
MMP1	0.233475	0.58415	0.407811	1.32667	Color2 [DarkGray]	1	4		-0.11382	0.48157	-0.604721	-0.0219619	2.23466	0.0114223	-0.921728	0.0479588
STRAP	0.25952	0.550149	-0.0527104	0.964123	Color2 [DarkGray]	1	4		0.116668	0.246234	-0.0774351	-0.0793239	-0.00461289	0.0533608	-0.0656985	0.0122522
SH3BP1	0.394471	0.403208	0.120572	1.08717	Color2 [DarkGray]	1	4		-0.173912	0.322256	-0.131489	-0.0858223	0.27534	0.110181	0.093223	-0.0654223
RAB14	0.202733	0.627	0.133848	1.09722	Color2 [DarkGray]	1	4		-0.779039	0.309275	-0.0230471	-0.0126505	0.179489	-0.0926954	0.234996	-0.291861
KRT76	0.995146	0.101124	-1.16731	0.445252	Color2 [DarkGray]	1	4		0.871356	2.21331	0.0267578	-0.170323	-0.00303456	-0.826307	-0.949995	0.0512139
SCP2	0.227192	0.592664	0.0892847	1.06384	Color2 [DarkGray]	1	4		-0.160493	-0.0787273	0.0899384	0.048491	0.373734	-0.066731	0.230609	-0.281264
RRP12	0.493917	0.320688	0.0740911	1.0527	Color2 [DarkGray]	1	4		0.0155631	-0.142864	0.00502226	-0.0233046	0.102526	0.0916831	0.0926055	-0.136034
RBM14	0.00794911	0.981863	-0.00396115	0.997258	Color2 [DarkGray]	1	4		-0.118064	-0.0967746	0.230468	0.0280352	-0.388179	0.321777	0.0395814	0.0546406
G3BP1	0.221792	0.600079	0.144283	1.10518	Color2 [DarkGray]	1	4		-0.690352	-0.182463	0.0196328	-0.0561473	-0.697075	0.17391	0.131688	0.0592783
GNAI3	0.375846	0.420875	-0.0887562	0.940333	Color2 [DarkGray]	1	4		0.149013	-0.197449	0.147304	0.0995255	0.0851612	-0.135792	0.0433271	-0.149327
POLR2B	0.303515	0.497147	0.0805847	1.05745	Color2 [DarkGray]	1	4		0.00770707	-0.0403591	0.0459994	-0.10225	-0.252174	0.150998	0.103153	0.231459
HDAC1	1.01671	0.0962246	-0.275697	0.826051	Color2 [DarkGray]	1	4		-0.0465592	0.26237	0.0495445	0.210341	-0.283981	-0.109058	-0.392752	0.1587
NBEAL2	0.12235	0.754484	-0.0569238	0.961312	Color2 [DarkGray]	1	4		0.22269	0.0376461	-0.13132	-0.10025	0.219052	-0.493571	0.044509	0.0310804
PLA2G4E	0.989571	0.102431	0.564592	1.47897	Color2 [DarkGray]	1	4		-0.207181	0.0401619	-0.134992	-0.179698	-0.00784452	0.157467	0.347179	1.27986
VDAC2	0.318549	0.480231	-0.151802	0.900126	Color2 [DarkGray]	1	4		-0.0874624	0.331933	-0.0707319	0.109224	0.271788	0.0634754	-0.101139	-0.558369
EIF3H	0.184949	0.653207	0.100483	1.07213	Color2 [DarkGray]	1	4		0.0387921	-0.197898	-0.303463	0.0593354	-0.502677	0.387861	0.193342	-0.0798271
SRP54	0.00786763	0.982047	-0.00331755	0.997703	Color2 [DarkGray]	1	4		-0.232403	0.0468	-0.0702542	0.0631037	-0.253237	0.257968	-0.250205	0.0394506
UFL1	0.0155628	0.9648	-0.00550143	0.996194	Color2 [DarkGray]	1	4		-0.146448	0.0270608	0.0664121	-0.0546198	-0.30254	0.0725744	0.203956	-0.103592
TPM1	0.115103	0.76718	-0.187476	0.878141	Color2 [DarkGray]	1	4		0.0316438	-1.3232	0.687824	-0.03104	-1.44139	0.564314	-0.587977	0.0803774
MTAP	0.244225	0.569868	0.135287	1.09831	Color2 [DarkGray]	1	4		-0.47262	-0.0369763	0.0671693	0.139042	-0.200403	0.585092	-0.114993	-0.0319319
TOMM70	0.394445	0.403232	-0.155651	0.897728	Color2 [DarkGray]	1	4		0.0372991	-0.0225734	0.217397	0.120234	-0.460715	0.340043	-0.0189531	-0.130621
S100A8	0.0538507	0.883384	0.0287496	1.02013	Color2 [DarkGray]	1	4		-0.0945311	-0.0399396	0.0177448	0.103437	0.262978	-0.411359	0.384776	-0.134686
EMC1	0.556401	0.277715	0.156325	1.11445	Color2 [DarkGray]	1	4		-0.139657	-0.033887	-0.0504173	0.19597	0.427555	0.0370577	-0.0762669	0.208965
OXSR1	0.437379	0.365276	0.141079	1.10273	Color2 [DarkGray]	1	4		-0.0586785	0.294439	-0.122027	-0.13732	-0.0519406	0.0856294	0.426505	0.0805378
TCOF1	0	1	NaN	#VALUE!	Color2 [DarkGray]	1	4		NaN	NaN	NaN	NaN	NaN	NaN	NaN	NaN
RPS27A	0.753727	0.176308	-0.379971	0.768453	Color2 [DarkGray]	1	4		0.627756	0.274155	0.0882134	-0.13185	-0.465183	0.361732	-0.148775	-0.409384
PPP1CC	0.157434	0.69593	0.30189	1.23276	Color2 [DarkGray]	1	4		-2.25801	0.739528	0.401265	-0.150821	-0.752985	0.670738	0.180143	-0.158371
NAP1L1	0.111745	0.773134	-0.0472661	0.967769	Color2 [DarkGray]	1	4		-0.239207	0.235476	0.233606	0.0182077	0.000359571	0.32329	-0.0883265	-0.176305
PAFAH1B1	0.746238	0.179375	-0.299655	0.812447	Color2 [DarkGray]	1	4		-0.0230215	0.470038	-0.00258929	0.167147	-0.582406	0.192396	-0.122363	-0.0746736
OAS2	0.0805697	0.830673	-0.123434	0.918	Color2 [DarkGray]	1	4		-0.07003	1.32463	0.187881	-0.0858299	0.102633	1.49077	-0.433786	-0.296698
ERP44	0.326156	0.471894	-0.149192	0.901756	Color2 [DarkGray]	1	4		-0.227696	0.25966	0.0702502	0.253346	-0.327196	0.359988	-0.000976332	-0.273021
VPS4B	0.113582	0.769871	0.0595047	1.04211	Color2 [DarkGray]	1	4		-0.235196	0.350258	-0.0909806	0.0155838	-0.172328	0.0158014	0.502073	-0.0678611
39326	0.789617	0.162324	0.241285	1.18205	Color2 [DarkGray]	1	4		0.0155372	-0.122312	0.0498067	-0.186207	0.556282	-0.118337	0.095426	0.188596
SRRT	0.793681	0.160812	-0.348676	0.785304	Color2 [DarkGray]	1	4		0.0377785	-0.0230637	0.105176	0.129552	-0.859693	0.147106	-0.337855	-0.0948191
ITPR2	1.30268	0.0498109	0.51462	1.42862	Color2 [DarkGray]	1	4		-0.440169	-0.149917	0.115474	-0.472143	0.456055	-0.192145	0.478076	0.36974
RPS3	0.201829	0.628306	-0.0837183	0.943622	Color2 [DarkGray]	1	4		-0.321637	-0.0197037	0.0419898	0.00535402	-0.572183	0.0611544	-0.0691532	-0.0486884
CYFIP2	0.522002	0.300606	-0.341795	0.789059	Color2 [DarkGray]	1	4		-0.537519	0.312883	0.749138	0.601531	-0.0258053	-0.0775774	0.152862	-0.290627
PPIB	0.381296	0.415627	-0.20174	0.869501	Color2 [DarkGray]	1	4		-0.414779	0.136264	0.258294	-0.0240524	-0.24699	0.145098	-0.690889	-0.0584521
ESYT2	0.062251	0.866461	-0.0306237	0.978997	Color2 [DarkGray]	1	4		0.461819	-0.0799406	0.112809	-0.0385029	0.453406	-0.06	-0.0155016	-0.044215
CAMK2D	0.668422	0.214574	-0.250339	0.840699	Color2 [DarkGray]	1	4		-0.152046	0.353088	0.147952	0.06547	-0.406602	0.197308	-0.00161281	-0.375984
EEF1D	0.358776	0.437747	-0.166924	0.89074	Color2 [DarkGray]	1	4		0.331519	-0.236277	-0.0614494	0.0302315	-0.343856	-0.506783	0.13466	0.112309
VPS13C	0.428415	0.372894	-0.0913405	0.93865	Color2 [DarkGray]	1	4		-0.0250851	0.0385553	0.200846	0.126227	-0.0397056	-0.050198	-0.157954	0.223039
PCNA	0.110345	0.775632	0.0725217	1.05155	Color2 [DarkGray]	1	4		-0.0546985	0.433854	-0.231696	0.0126046	0.00625228	0.558301	-0.376277	0.261874
ACTR2	0.115578	0.76634	0.03871	1.02719	Color2 [DarkGray]	1	4		-0.254552	0.343261	-0.0244265	-0.0275394	0.0434562	0.0410426	0.0864751	0.0206092
39326	0.920545	0.120076	-0.274849	0.826537	Color2 [DarkGray]	1	4		0.190829	-0.131005	0.264992	0.239118	-0.457088	0.0849401	0.0107152	-0.174027
ANK3	0.190801	0.644464	0.0639978	1.04536	Color2 [DarkGray]	1	4		0.0206011	-0.00569335	-0.117586	0.178493	-0.239066	0.305395	0.0799419	0.185535
KPNA4	0.187715	0.64906	-0.0873414	0.941256	Color2 [DarkGray]	1	4		0.040567	0.161483	-0.0575993	0.511259	0.00684978	0.436109	0.070154	-0.206768
PTK7	0.348019	0.448725	0.106745	1.0768	Color2 [DarkGray]	1	4		-0.0848219	-0.116115	0.0476305	0.0468309	0.427576	-0.0556827	-0.136156	0.0847678
ACACA	0.274751	0.531189	0.121953	1.08821	Color2 [DarkGray]	1	4		0.0167675	-0.355063	-0.181506	0.0257403	0.0445317	-0.390225	0.386104	-0.0466604
VAT1	0.214896	0.609683	-0.117448	0.921817	Color2 [DarkGray]	1	4		0.193232	-0.339679	0.21355	-0.00390792	0.296353	-0.490001	0.0730215	-0.28597
COMT	0.0865754	0.819265	-0.0536132	0.96352	Color2 [DarkGray]	1	4		-0.604396	0.137741	0.418865	0.114655	0.0435849	0.00650089	-0.00535152	-0.192322
TRIP11	0.335271	0.462093	0.071005	1.05045	Color2 [DarkGray]	1	4		0.110234	-0.244891	-0.0707181	0.0863616	0.0174677	0.0322758	-0.0314004	0.146663
EIF3D	0.192451	0.64202	-0.0680425	0.953931	Color2 [DarkGray]	1	4		0.125809	-0.037031	-0.210746	0.0604936	-0.263619	0.121436	0.119923	-0.311385
RPLP0	0.441045	0.362205	-0.242581	0.845232	Color2 [DarkGray]	1	4		0.173737	-0.111566	0.102539	-0.0327584	-0.910415	0.022117	0.128854	-0.0789272
PRPF19	0.406373	0.392308	-0.0920681	0.938177	Color2 [DarkGray]	1	4		0.01007	-0.103725	0.0215964	0.130296	-0.311698	0.0209854	-0.106005	0.0866824
FLOT1	0.115988	0.765618	0.116798	1.08433	Color2 [DarkGray]	1	4		-0.00951737	-0.267283	0.0149014	0.0357598	1.04771	-0.731229	-0.0603239	-0.0150994
PRDX6	0.182156	0.657421	-0.0641362	0.956518	Color2 [DarkGray]	1	4		-0.349951	0.105815	0.0641701	-0.0131806	-0.348729	-0.134562	0.0824497	-0.04885
SERPIND1	0.244674	0.56928	0.547577	1.46163	Color2 [DarkGray]	1	4		0.100552	0.814005	-0.207388	-0.104494	3.05753	-0.957425	-0.262385	0.955261
ECH1	0.3894	0.407944	0.224321	1.16823	Color2 [DarkGray]	1	4		0.0133457	-0.184112	-0.27014	0.464742	0.60367	0.0177523	0.498155	-0.198459
SMARCA5	0.0668774	0.85728	-0.0218135	0.984994	Color2 [DarkGray]	1	4		-0.109744	0.171058	-0.118742	0.137774	0.00111316	0.0479533	-0.234628	0.178653
TES	0.876146	0.133001	-0.221674	0.85757	Color2 [DarkGray]	1	4		0.310025	0.184	-0.100169	0.0447448	0.0473901	-0.0491173	-0.377079	-0.0692903
NXN	0.541672	0.287295	0.208024	1.15511	Color2 [DarkGray]	1	4		-0.397588	0.115618	-0.23489	0.0496114	-0.111811	0.409482	0.202866	-0.135689
MAPK14	0.131835	0.738184	-0.0495404	0.966244	Color2 [DarkGray]	1	4		-0.0208125	0.105643	-0.0601586	0.0203052	0.166395	-0.37695	-0.143829	0.2012
EIF2AK2	0.0366868	0.918995	-0.051544	0.964903	Color2 [DarkGray]	1	4		-0.80622	0.821444	-0.117538	0.118876	0.135729	0.87036	-0.597164	-0.598539
SEC23B	0.634464	0.232026	0.149077	1.10886	Color2 [DarkGray]	1	4		-0.200758	0.143615	0.0255431	-0.190083	0.107775	-0.0319196	0.00225757	0.296512
GSPT1	0.0146029	0.966935	0.0046357	1.00322	Color2 [DarkGray]	1	4		-0.0184945	0.00595703	-0.0656414	0.0130025	-0.289758	-0.00237204	0.224612	0.020884
MCM6	0.0302184	0.932785	-0.0226805	0.984402	Color2 [DarkGray]	1	4		0.0300531	0.28067	-0.243308	-0.0294276	-0.0816936	0.285918	-0.64716	0.390202
DLG1	0.202586	0.627211	-0.106689	0.928717	Color2 [DarkGray]	1	4		0.373458	-0.281431	0.388386	-0.0239729	-0.228324	0.337015	0.0932712	-0.172279
OXCT1	0.535293	0.291546	-0.226282	0.854835	Color2 [DarkGray]	1	4		0.125973	-0.0586991	0.398003	-0.045383	-0.0794615	-0.576075	0.207838	-0.0375347
PPP1R7	0.23575	0.581099	-0.0985842	0.933949	Color2 [DarkGray]	1	4		-0.209097	-0.07785	0.110004	0.155357	-0.515779	0.043191	0.152676	-0.0960105
NUP98	0.117554	0.762861	0.0377984	1.02655	Color2 [DarkGray]	1	4		0.0241356	-0.204037	0.234908	-0.0234613	0.237679	0.0810801	0.00362016	-0.139641
EPB41	0.727356	0.187346	0.760334	1.69388	Color2 [DarkGray]	1	4		0.00782408	-0.345073	-0.271495	-0.00726622	1.09571	-0.463865	1.75759	0.035892
PZP	0.0919582	0.809174	-0.123669	0.91785	Color2 [DarkGray]	1	4		-0.0529036	1.31346	-0.401696	0.049965	0.812761	-0.532464	-0.311172	0.445021
EEF1A2	0.719651	0.190699	0.461024	1.37652	Color2 [DarkGray]	1	4		-0.430007	-0.3738	0.369642	-0.0299801	0.0495525	0.828969	-0.210239	0.711668
YWHAG	0.482235	0.329431	-0.231354	0.851835	Color2 [DarkGray]	1	4		0.170641	0.00931078	-0.0309083	0.372834	-0.578719	0.371901	-0.00508769	-0.191634
CAVIN1	0.394452	0.403225	-0.253828	0.838668	Color2 [DarkGray]	1	4		0.234213	-0.458561	0.292032	0.137665	-0.777735	0.300845	-0.0934138	-0.23966
ATP2B1	0.221535	0.600433	0.0894427	1.06396	Color2 [DarkGray]	1	4		0.257872	-0.0633989	-0.0498284	-0.00266441	0.0220753	-0.234165	0.351208	0.360634
BZW1	0.651143	0.223284	-0.331828	0.794529	Color2 [DarkGray]	1	4		0.110956	0.726317	-0.123631	0.0456938	-0.579397	0.15012	0.0204291	-0.159126
TMPO	0.258619	0.551291	0.100267	1.07197	Color2 [DarkGray]	1	4		-0.0614007	0.120429	0.0302716	-0.13966	0.313498	0.368736	-0.222623	-0.108901
MYL6	0.0242437	0.945706	-0.0107816	0.992555	Color2 [DarkGray]	1	4		0.114853	0.0523228	-0.171324	-0.060278	0.0229844	0.0269082	0.251499	-0.408945
CUL1	1.10864	0.0778676	-0.243758	0.844542	Color2 [DarkGray]	1	4		0.123871	0.397218	-0.0619122	0.06223	-0.170973	0.0552495	-0.108639	-0.229263
EIF2A	0.106798	0.781991	-0.0231485	0.984083	Color2 [DarkGray]	1	4		-0.0386644	0.0973833	0.00425288	0.136121	-0.0409121	0.227227	0.00185416	-0.0816702
RAD23B	0.372668	0.423967	-0.221413	0.857725	Color2 [DarkGray]	1	4		-0.0534026	-0.0484768	0.0258497	0.258943	-0.887913	0.150078	0.170812	-0.135717
RAB7A	0.460848	0.34606	-0.126742	0.915898	Color2 [DarkGray]	1	4		-0.00824125	0.206365	-0.160784	0.241132	0.118722	0.0387936	-0.200664	-0.185347
EIF3I	0.615634	0.242307	-0.181152	0.881998	Color2 [DarkGray]	1	4		-0.062811	0.0191638	0.0172079	0.0142662	-0.582502	0.0557839	-0.122176	-0.0878887
ETF1	0.191635	0.643229	0.101096	1.07259	Color2 [DarkGray]	1	4		-0.127566	-0.00943592	-0.0119983	-0.172753	-0.553662	0.173701	0.395112	0.0674797
TPM3	0.143564	0.718515	0.0378294	1.02657	Color2 [DarkGray]	1	4		0.0449085	0.199621	-0.0749968	-0.243889	0.00991231	-0.0117342	0.119406	-0.0406232
HMGB1	0.888173	0.129368	-0.336793	0.7918	Color2 [DarkGray]	1	4		-0.0919986	0.0117814	0.278269	0.155115	-0.663835	0.130493	-0.380384	-0.0802784
DNAJC7	0.305438	0.49495	-0.134732	0.910839	Color2 [DarkGray]	1	4		0.0521949	0.0669048	-0.137937	-0.0210367	-0.648042	0.134327	0.090343	-0.155429
CLINT1	0.157151	0.696385	-0.114082	0.92397	Color2 [DarkGray]	1	4		-0.0101084	-0.310637	0.0412412	0.0361198	-0.901472	-0.136509	0.369642	-0.0313729
CORO7-PAM16	0.0447157	0.902162	0.0336579	1.0236	Color2 [DarkGray]	1	4		-0.113318	0.212552	-0.0485616	0.0121507	0.636789	-0.146452	-0.538359	0.245476
SMARCC2	0.762298	0.172863	-0.238893	0.847395	Color2 [DarkGray]	1	4		0.0489779	-0.101575	0.126788	-0.00772469	-0.642276	0.0203486	-0.19472	-0.0724597
SLC25A6	0.15829	0.69456	0.0952281	1.06823	Color2 [DarkGray]	1	4		0.132051	-0.320443	-0.0724781	-0.0566261	0.102256	0.5073	-0.519388	-0.0267523
RPA1	0.126527	0.747263	0.0506437	1.03573	Color2 [DarkGray]	1	4		0.0177142	-0.195156	-0.0515518	0.252529	-0.261702	0.305288	0.0932625	0.0892605
ECHS1	0.0118079	0.973178	-0.00509294	0.996476	Color2 [DarkGray]	1	4		-0.344154	0.0452222	0.265843	-0.0354551	-0.0158664	0.0474322	0.104608	-0.22509
SLC25A5	0.500944	0.315541	0.161701	1.11861	Color2 [DarkGray]	1	4		0.278341	-0.0609588	-0.119383	0.00257589	0.0166833	0.434218	-0.04627	0.342748
RCN1	0.181183	0.658896	-0.102153	0.931642	Color2 [DarkGray]	1	4		-0.122132	0.0238075	0.0423519	0.326144	-0.294337	0.545307	-0.296692	-0.0927163
COL1A2	0.192087	0.642558	-0.265626	0.831838	Color2 [DarkGray]	1	4		1.06198	-0.928381	0.906368	0.0259131	-0.541486	-0.173109	0.827927	-0.109952
GOT2	0.921644	0.119772	0.260889	1.19822	Color2 [DarkGray]	1	4		-0.116419	-0.434768	0.193641	-0.0440455	0.00982281	0.226533	0.112974	0.292635
TGM2	0.622287	0.238623	-0.351039	0.784019	Color2 [DarkGray]	1	4		-0.399262	0.360446	0.374742	0.0433481	0.0900345	-0.0417283	-0.267328	-0.80586
HNRNPUL1	0.895606	0.127173	0.155618	1.1139	Color2 [DarkGray]	1	4		-0.186068	-0.288777	-0.0284195	0.0616855	0.11556	0.106234	0.00795202	-0.0488539
PTPN12	1.05084	0.088953	-0.319109	0.801565	Color2 [DarkGray]	1	4		0.187511	0.612412	-0.0775888	0.12276	-0.0761225	-0.0696424	-0.283423	-0.0021538
TTC37	0.293886	0.508293	-0.0716436	0.951553	Color2 [DarkGray]	1	4		-0.118972	0.158195	-0.0112896	-0.0166329	-0.152881	0.0563088	0.085929	-0.264631
RPL17-C18orf32	0.0479683	0.89543	0.035082	1.02462	Color2 [DarkGray]	1	4		-0.270224	-0.100051	0.204056	-0.100043	-0.703449	0.185866	0.378259	0.0133895
COL4A2	0.234892	0.582248	-0.145176	0.904269	Color2 [DarkGray]	1	4		0.0479743	-0.675356	0.20678	0.196441	-0.48725	-0.0173408	-0.374432	0.074158
C8A	0.312434	0.487042	0.735733	1.66524	Color2 [DarkGray]	1	4		0.128736	0.617192	-0.591462	-0.136725	3.18133	-0.831167	-0.762088	1.37259
NRDC	0.696599	0.201095	0.104849	1.07538	Color2 [DarkGray]	1	4		-0.100938	0.0657834	-0.212066	0.0564798	0.00204446	0.0151365	0.0846115	0.126863
GLS	0.135254	0.732396	0.101343	1.07277	Color2 [DarkGray]	1	4		-0.573469	-0.060562	-0.200104	0.406003	0.273596	0.276518	-0.5632	-0.00967527
MYO1F	0.0409303	0.910059	-0.0491193	0.966526	Color2 [DarkGray]	1	4		0.2713	0.047342	-0.236244	-0.0761823	0.980987	-0.554783	-0.806892	0.190427
MCM7	0.0376038	0.917057	-0.0214069	0.985271	Color2 [DarkGray]	1	4		0.0814126	0.247985	-0.133386	-0.0833571	-0.0802698	0.257494	-0.457644	0.307447
STAT2	0.17982	0.660967	-0.186033	0.87902	Color2 [DarkGray]	1	4		-0.100772	1.12625	-0.139272	0.104756	0.152575	0.77754	-0.193714	-0.489566
CTSB	1.19558	0.0637406	-0.538492	0.68849	Color2 [DarkGray]	1	4		-0.0170134	0.109896	0.390789	0.609579	-0.780837	-0.27616	0.127013	-0.130736
PPIA	0.118883	0.76053	-0.0744071	0.949732	Color2 [DarkGray]	1	4		-0.463371	0.0638509	0.0568537	-0.0942047	-0.661946	0.0865323	0.190822	-0.349907
ALDOC	1.06421	0.0862556	-0.419591	0.747637	Color2 [DarkGray]	1	4		0.690976	-0.0188082	0.703329	0.0304617	0.0525621	-0.15657	-0.0661787	-0.102219
ACOT7	1.15471	0.0700302	-0.617706	0.651706	Color2 [DarkGray]	1	4		0.10815	0.945282	0.00894916	-0.0148708	-0.175727	0.00431049	-0.681067	-0.570831
CSNK1A1	0.734415	0.184325	0.418465	1.3365	Color2 [DarkGray]	1	4		-0.97036	0.214084	-0.434094	-0.0761544	-0.162542	0.263733	0.314552	-0.00840904
SUN2	1.06054	0.0869878	0.316858	1.24561	Color2 [DarkGray]	1	4		-0.468615	-0.204952	0.173972	-0.0682894	0.34284	-0.00612067	0.10571	0.257118
GSTO1	0.168281	0.678765	-0.182978	0.880883	Color2 [DarkGray]	1	4		0.0287861	0.674658	-0.498714	0.475503	0.0324862	0.74333	0.0405058	-0.867999
A1BG	0.278716	0.526361	0.358594	1.28218	Color2 [DarkGray]	1	4		-0.677623	0.871115	0.0789367	-0.121159	1.62546	-0.284482	-0.044032	0.288702
PPP4R1	1.09566	0.0802314	0.451983	1.36792	Color2 [DarkGray]	1	4		-0.643582	0.170362	-0.216473	-0.540106	-0.191371	0.238361	0.272036	0.259107
DDX19A	0.632691	0.232975	0.118255	1.08542	Color2 [DarkGray]	1	4		0.127868	-0.049838	-0.0295322	-0.0348756	0.054368	0.176408	-0.0549748	0.310839
KPNA6	0.418699	0.38133	0.145065	1.10578	Color2 [DarkGray]	1	4		-0.367831	0.241266	-0.0203279	-0.0547993	0.0452869	0.114919	0.32481	-0.106447
DLG1	0	1	NaN	#VALUE!	Color2 [DarkGray]	1	4		NaN	NaN	NaN	NaN	NaN	NaN	NaN	NaN
U2AF2	0.419191	0.380898	-0.231576	0.851704	Color2 [DarkGray]	1	4		-0.204489	-0.0336238	0.0116876	0.117575	-0.775788	0.220412	-0.529932	0.0501539
PRELP	0.0509944	0.889213	0.106251	1.07643	Color2 [DarkGray]	1	4		-0.237593	-0.923335	1.70598	0.116325	-0.506657	0.0608079	1.64693	-0.114701
DSTN	0.567481	0.270719	0.151878	1.11102	Color2 [DarkGray]	1	4		-0.395255	0.160658	0.000520498	-0.0407923	0.0234777	-0.00588753	0.177092	0.137962
TKFC	0.289681	0.513238	0.118206	1.08538	Color2 [DarkGray]	1	4		-0.0932514	-0.106173	0.138893	0.0729299	-0.157738	-0.149478	0.412896	0.379543
ZYX	0.70937	0.195267	-0.254195	0.838455	Color2 [DarkGray]	1	4		0.420816	-0.00831537	0.0854235	-0.0362439	-0.406645	0.0120018	0.17592	-0.336378
CS	0.340285	0.456789	-0.103217	0.930954	Color2 [DarkGray]	1	4		0.278636	-0.0435517	0.182469	0.0158421	0.311617	-0.033399	-0.0801933	-0.177499
HMOX2	0.890867	0.128568	-0.254346	0.838367	Color2 [DarkGray]	1	4		0.16185	0.416681	-0.213579	0.159451	-0.224077	0.0459576	-0.215948	-0.0989146
KRT72	1.31188	0.0487665	0.747044	1.67835	Color2 [DarkGray]	1	4		-0.382959	-0.198305	0.0920651	-0.365442	-0.0757007	0.215746	1.16284	0.830649
RPLP2	0.00292016	0.993299	-0.00227242	0.998426	Color2 [DarkGray]	1	4		0.0120903	-0.303901	0.110581	-0.0114669	-0.676927	0.3184	0.353321	-0.196579
FRYL	0.0247373	0.944632	0.0115688	1.00805	Color2 [DarkGray]	1	4		-0.167983	0.160939	-0.144214	0.444793	0.0184383	0.0313345	0.00252233	0.287515
MUC5B	0.78556	0.163848	-1.37949	0.384354	Color2 [DarkGray]	1	4		0.207634	2.96268	-0.819083	1.25313	0.21204	-0.531731	-1.33672	-0.257193
CMPK1	0.150097	0.707788	0.0992136	1.07119	Color2 [DarkGray]	1	4		-0.557712	0.0312617	0.309963	0.137121	-0.0204408	-0.0285749	0.567717	-0.201212
FTL	0.413187	0.386201	-0.651295	0.636708	Color2 [DarkGray]	1	4		-0.194762	-0.565667	1.23449	1.02148	0.227921	-0.685937	-1.55831	0.906672
EPHX1	0.123945	0.751719	0.0827368	1.05903	Color2 [DarkGray]	1	4		-0.215761	-0.402363	0.471403	0.069354	0.108782	-0.222519	0.501393	-0.134076
DNAJB1	0.168071	0.679093	-0.0941809	0.936804	Color2 [DarkGray]	1	4		0.026531	-0.0138871	-0.0205272	0.0998844	-0.671295	0.232672	0.247516	-0.0936164
GBP2	0.338536	0.458631	-0.308737	0.807348	Color2 [DarkGray]	1	4		0.144662	1.20125	-0.244098	-0.14904	-0.2813	0.12798	0.394802	-0.523658
LRRC59	1.06133	0.0868306	-0.371543	0.772955	Color2 [DarkGray]	1	4		0.0259491	0.146224	-0.0199413	0.151146	-0.737205	0.124447	-0.317483	-0.252554
PHB	0.277309	0.528069	0.0999333	1.07172	Color2 [DarkGray]	1	4		0.138223	-0.0120204	-0.0094296	-0.229092	0.408969	-0.0295915	-0.199223	0.107259
CDC5L	0.28793	0.515312	-0.146454	0.903469	Color2 [DarkGray]	1	4		-0.0186074	-0.14218	0.0593768	0.069739	-0.758435	0.172105	-0.00787833	-0.0232777
HNRNPAB	0.351507	0.445136	0.380204	1.30153	Color2 [DarkGray]	1	4		-1.03066	-0.0948463	0.189985	-0.260399	-0.966047	0.819015	0.450478	0.0214531
CLIC3	0.194064	0.639641	-0.237851	0.848008	Color2 [DarkGray]	1	4		0.0801827	-0.132649	0.635278	-0.0627219	-0.891956	0.0509832	1.098	-0.688337
PRDX5	0.566803	0.271142	0.270173	1.20595	Color2 [DarkGray]	1	4		-0.66913	0.0445407	-0.067823	0.0839323	0.191531	-0.200332	0.0272777	0.453734
PPP2CA	0.0963219	0.801084	-0.0283529	0.980539	Color2 [DarkGray]	1	4		-0.0326021	0.197463	-0.0790114	0.150679	-0.095397	0.0196002	0.270615	-0.071701
SUPT5H	0.208758	0.618361	-0.041452	0.971677	Color2 [DarkGray]	1	4		0.0958273	0.0518882	-0.130813	-0.0222986	0.00407762	0.08802	-0.203102	-0.0601995
MTA2	0.525203	0.298399	-0.210598	0.864179	Color2 [DarkGray]	1	4		0.0847482	-0.0418248	0.0850257	0.014199	-0.70047	-0.033059	-0.105263	0.138549
PALLD	0.779065	0.166316	-0.553838	0.681206	Color2 [DarkGray]	1	4		0.520835	-0.480611	0.0648996	0.541218	-0.896728	0.0401735	0.0589468	-0.771401
NAP1L4	0.036161	0.920108	0.0170302	1.01187	Color2 [DarkGray]	1	4		0.0629449	-0.057757	0.0741553	-0.211076	-0.396851	0.190871	0.247375	-0.105008
STIM1	0.352892	0.443719	-0.248413	0.841822	Color2 [DarkGray]	1	4		0.00732366	0.00745268	0.18223	0.0879762	-0.824138	-0.150305	0.617536	-0.351764
SEC24B	0.0666545	0.85772	0.00940927	1.00654	Color2 [DarkGray]	1	4		0.111065	-0.099381	-0.0694054	0.0276373	0.0341096	0.0159594	-0.00605452	-0.0364616
PRDX1	0.699856	0.199592	-0.174954	0.885796	Color2 [DarkGray]	1	4		0.149976	-0.0670275	0.0431448	0.180135	-0.27276	-0.104028	0.206473	-0.223273
AIFM1	0.178658	0.662738	0.164853	1.12105	Color2 [DarkGray]	1	4		0.038857	-0.355767	0.229644	-0.038396	-0.51189	0.878931	-0.361507	0.528217
PARP4	0.00456162	0.989551	0.00378762	1.00263	Color2 [DarkGray]	1	4		-0.0565841	0.421613	-0.0614868	0.0243901	0.608077	-0.0659879	0.348245	-0.547251
ROCK1	0.43847	0.364359	-0.189069	0.877171	Color2 [DarkGray]	1	4		0.0283835	0.000247978	-0.0997841	0.0794723	0.292813	-0.434843	-0.537382	-0.0685458
TAP2	0.0771863	0.83717	-0.106069	0.929116	Color2 [DarkGray]	1	4		0.0579382	1.676	-0.110818	-0.163339	0.784217	0.486867	-0.135865	-0.0997165
DDX18	0.0904177	0.812049	0.039946	1.02808	Color2 [DarkGray]	1	4		-0.0385826	-0.132163	0.042229	0.263223	-0.274002	0.287147	-0.0161938	0.297538
UBA3	0.774264	0.168165	-0.172236	0.887466	Color2 [DarkGray]	1	4		0.0135735	0.270236	0.177154	-0.012933	0.00169527	-0.271486	0.138507	-0.10963
AKR1C1	0.0661648	0.858688	-0.0833375	0.943872	Color2 [DarkGray]	1	4		-0.659426	0.0609507	0.652796	0.284883	-0.395082	-0.604971	0.0192977	0.986609
DOCK2	0.24272	0.571848	-0.170784	0.88836	Color2 [DarkGray]	1	4		0.109612	0.163042	-0.0438532	-0.328403	0.479596	-0.591363	-0.637113	-0.033859
IGFALS	0.386868	0.410329	0.841977	1.79251	Color2 [DarkGray]	1	4		-0.0220782	0.547875	0.0268425	-0.634332	3.46514	-0.530985	-0.330786	0.682847
RPS6	0.321644	0.476822	-0.135438	0.910393	Color2 [DarkGray]	1	4		0.0799992	-0.124723	0.0166599	-0.0578606	-0.66729	0.0118036	0.0896008	-0.0617919
NPLOC4	0.0792768	0.83315	0.0249403	1.01744	Color2 [DarkGray]	1	4		0.0266987	0.150259	-0.051554	-0.0260394	-0.221022	0.204195	-0.00621886	0.222172
CNP	0.404006	0.394452	-0.209405	0.864894	Color2 [DarkGray]	1	4		-0.0775511	0.117769	0.128186	-0.0196743	-0.457334	0.00913563	0.366934	-0.607624
MARCKS	0.96277	0.108951	-0.441121	0.736562	Color2 [DarkGray]	1	4		0.0495347	0.00898796	-0.0305784	0.400747	-0.762627	0.212839	-0.231952	-0.554052
SERPINB6	1.58281	0.0261331	-0.590917	0.663921	Color2 [DarkGray]	1	4		0.0909546	0.466206	0.618586	0.240874	-0.0331888	-0.228439	0.0164836	-0.701903
C1orf116	0.260567	0.548824	-0.197235	0.872221	Color2 [DarkGray]	1	4		0.395808	0.358027	0.0336797	-0.129012	-0.673059	-0.0513752	0.706542	-0.112543
PICALM	0	1	NaN	#VALUE!	Color2 [DarkGray]	1	4		NaN	NaN	NaN	NaN	NaN	NaN	NaN	NaN
CPT1A	0.223246	0.598072	-0.137197	0.909284	Color2 [DarkGray]	1	4		0.0843804	-0.269405	-0.017145	-0.0185125	0.118476	-0.775692	-0.362314	0.250058
HP1BP3	0.649533	0.224113	-0.27024	0.829182	Color2 [DarkGray]	1	4		0.314787	-0.210119	0.474388	0.0300513	-0.363344	0.163939	0.0374196	-0.309865
PSMA4	0.493307	0.321139	-0.287044	0.81958	Color2 [DarkGray]	1	4		0.12288	0.531986	-0.0148137	-0.0208412	-0.595132	0.510024	-0.217909	-0.225947
OLA1	0.724161	0.188729	0.242798	1.18329	Color2 [DarkGray]	1	4		-0.58412	0.0208979	-0.139186	0.0389786	-0.0125312	0.292691	0.0723714	-0.0447707
CRYZ	1.31534	0.0483798	-0.484152	0.714917	Color2 [DarkGray]	1	4		0.452137	0.620941	0.370065	-0.122582	-0.183466	-0.459739	0.0588514	-0.0316928
PCYOX1	0.790373	0.162042	0.360054	1.28347	Color2 [DarkGray]	1	4		-0.389057	-0.254951	0.122348	-0.0439317	0.619474	-0.185894	0.479984	-0.0389385
DYNC1LI2	0.0907404	0.811446	0.0577748	1.04086	Color2 [DarkGray]	1	4		-0.00110903	-0.34058	-0.05672	0.354466	-0.406304	0.172657	0.460851	-0.0400473
CA2	0.743439	0.180535	0.770741	1.70615	Color2 [DarkGray]	1	4		-1.11722	0.0948559	-1.15442	-0.129253	0.225638	-0.738406	1.16997	0.119715
GYS1	1.31997	0.0478665	0.439245	1.35589	Color2 [DarkGray]	1	4		-0.22396	0.046196	-0.31421	-0.263038	0.712429	0.0230763	0.0765698	0.189893
RTRAF	0.0208595	0.953105	0.00938098	1.00652	Color2 [DarkGray]	1	4		-0.211518	-0.0258401	0.184851	-0.00119242	-0.335594	0.298801	0.0149169	0.00570061
CDV3	0.217257	0.606377	-0.16776	0.890224	Color2 [DarkGray]	1	4		0.182334	-0.257364	-0.11603	0.480016	-0.812743	0.404715	0.140733	-0.114788
LUM	0.0808424	0.830152	0.128874	1.09344	Color2 [DarkGray]	1	4		-0.0468868	-1.04723	1.23768	0.381941	-0.0408181	0.0749599	1.21737	-0.210514
PICALM	0.38861	0.408686	-0.138995	0.908152	Color2 [DarkGray]	1	4		0.0237904	0.314278	-0.0578287	0.162851	-0.27717	0.293126	0.0871902	-0.216034
ORM1	0.218547	0.604579	0.347408	1.27227	Color2 [DarkGray]	1	4		-1.76161	0.944595	0.185082	-0.253077	0.799407	-0.420122	-0.249986	0.375318
ATXN2L	0.217422	0.606147	-0.0779106	0.947429	Color2 [DarkGray]	1	4		0.140851	-0.0458702	-0.0905084	0.0180417	-0.453054	0.177432	-0.00859381	-0.00491261
SLC9A3R1	0.377887	0.418903	-0.419786	0.747535	Color2 [DarkGray]	1	4		-0.00512644	-0.715688	0.58202	0.168493	-1.41662	0.0357957	0.397419	-0.666043
EIF3E	0.259336	0.550382	-0.0971895	0.934852	Color2 [DarkGray]	1	4		0.00207485	-0.0753035	0.00369907	0.0315592	-0.46294	0.0811447	0.20183	-0.246764
DNAJA1	0.0990447	0.796077	0.0810257	1.05777	Color2 [DarkGray]	1	4		0.0342338	0.29118	-0.348788	0.0292153	-0.183925	0.879786	-0.290747	-0.0751703
SWAP70	0.742922	0.18075	0.207501	1.15469	Color2 [DarkGray]	1	4		-0.373757	-0.0409826	-0.244295	0.0133965	-0.248334	0.195947	0.184473	0.0522808
NUP160	0.853041	0.140268	0.184298	1.13626	Color2 [DarkGray]	1	4		-0.119153	0.00994477	-0.0315564	-0.178514	0.387849	0.0573717	-0.081207	0.0538984
RCC2	0.411267	0.387911	-0.189769	0.876746	Color2 [DarkGray]	1	4		-0.0550936	0.0726258	-0.234151	0.0782608	-0.660709	0.166718	-0.413889	0.0104456
RRM1	0.391713	0.405777	-0.103187	0.930974	Color2 [DarkGray]	1	4		0.145897	0.0194484	-0.108282	-0.0388578	-0.397433	0.0621898	-0.0154306	-0.0438688
ACAT2	0.616987	0.241554	0.365338	1.28818	Color2 [DarkGray]	1	4		-0.352889	-0.588945	0.538604	-0.159509	-0.0285556	0.0755273	0.617927	0.233714
ACSL1	1.09777	0.0798411	0.160011	1.1173	Color2 [DarkGray]	1	4		-0.273409	-0.123825	-0.0118393	-0.0238232	0.0826649	-0.0338625	0.167371	-0.00902536
AFM	0.0763897	0.838707	0.108018	1.07775	Color2 [DarkGray]	1	4		0.205456	0.575332	-0.226465	-0.380951	1.26714	-0.916198	-0.147498	0.402003
APOE	0.224374	0.596521	-0.366069	0.775894	Color2 [DarkGray]	1	4		0.996742	0.201495	0.0137214	-0.0499659	1.72366	-0.969101	-0.479314	-0.577532
NDUFV1	1.31583	0.048325	0.277417	1.21202	Color2 [DarkGray]	1	4		-0.236325	-0.412601	-0.0302075	-0.0056028	-0.0109206	0.130555	0.259148	0.046148
HIP1R	0.97361	0.106265	-0.362581	0.777772	Color2 [DarkGray]	1	4		0.118168	0.505754	-0.110313	0.49729	-0.430101	-0.0218311	0.120912	-0.108404
EXOC4	0.0439779	0.903696	-0.0193946	0.986647	Color2 [DarkGray]	1	4		0.259947	-0.0194573	0.0119805	-0.0918588	0.0531999	-0.156188	0.385008	-0.198987
HLA-C	0.508333	0.310218	-0.61721	0.651931	Color2 [DarkGray]	1	4		0.783782	1.45894	-0.241672	0.0499454	-0.0339282	0.818253	-0.0439964	-1.15817
DGKA	0.755842	0.175452	-0.14596	0.903778	Color2 [DarkGray]	1	4		0.043643	0.302712	-0.024891	0.0161015	-0.00869917	0.0196309	-0.0189286	-0.23828
RPL6	0.100029	0.794275	-0.093755	0.937081	Color2 [DarkGray]	1	4		-0.0425309	-0.124438	0.142361	-0.0923883	-1.13	0.3401	0.150821	0.147059
MAPK14	0.42361	0.377042	0.218082	1.16319	Color2 [DarkGray]	1	4		-0.0941055	0.538906	-0.242172	-0.242122	0.414199	0.116711	-0.126444	0.428368
PHB2	0.165823	0.682616	0.0645704	1.04577	Color2 [DarkGray]	1	4		0.0167954	0.204028	-0.0107849	-0.216532	0.394887	-0.167673	-0.0711676	0.095742
MYH3	0.226743	0.593276	-0.0852336	0.942632	Color2 [DarkGray]	1	4		0.35272	0.0460164	0.00479892	-0.0417528	0.355617	-0.208753	-0.0437851	-0.0822312
CLCA2	0.881838	0.131269	0.378654	1.30013	Color2 [DarkGray]	1	4		-0.284629	-0.0172456	-0.0042645	-0.160115	-0.35308	0.469358	0.523756	0.408326
MYO9B	0.0517162	0.887736	-0.0350613	0.97599	Color2 [DarkGray]	1	4		0.090686	0.525368	-0.0881812	-0.110036	0.594535	-0.179483	-0.216599	0.0791381
SAFB	0.454167	0.351425	-0.26957	0.829567	Color2 [DarkGray]	1	4		-0.00354823	-0.152178	0.00915528	0.171134	-0.96583	0.182713	-0.331514	0.0609132
SAE1	0.43538	0.366961	-0.166377	0.891077	Color2 [DarkGray]	1	4		-0.137393	0.0133898	-0.0350887	0.112909	-0.591775	0.160403	-0.258354	-0.021966
SEC63	0.320607	0.477962	-0.0709425	0.952016	Color2 [DarkGray]	1	4		0.228319	0.0934609	-0.159313	-0.0330927	0.0297701	0.0231765	-0.155635	-0.0517075
ST13	0.301553	0.499398	-0.171355	0.888009	Color2 [DarkGray]	1	4		-0.0101824	-0.0446474	0.0155387	0.186622	-0.667115	0.208158	0.300629	-0.379759
XPNPEP1	0.6711	0.213255	-0.37962	0.76864	Color2 [DarkGray]	1	4		-0.0588452	0.800862	0.111927	0.0553187	-0.365105	0.310934	-0.00624909	-0.548799
XPO7	0.295282	0.506661	0.167664	1.12324	Color2 [DarkGray]	1	4		-0.795097	0.188008	0.0212653	-0.0578636	0.103843	-0.177201	0.226239	-0.125913
RPS6KA3	0.0547343	0.881588	0.0415714	1.02923	Color2 [DarkGray]	1	4		-0.0383625	0.303047	0.0861934	-0.0266227	0.884236	-0.14161	-0.196187	-0.055899
DNAJC3	2.70723	0.00196231	-0.177593	0.884177	Color2 [DarkGray]	1	4		0.0764761	0.118226	0.0909539	0.0452479	-0.0378483	-0.0475399	-0.138549	-0.155532
SUB1	1.28071	0.052395	-0.532337	0.691434	Color2 [DarkGray]	1	4		0.51338	0.323863	0.0289259	-0.06597	-0.548023	-0.185953	-0.685116	0.0899424
ADK	0.769861	0.169879	-0.284309	0.821135	Color2 [DarkGray]	1	4		-0.191618	0.2614	0.0990153	0.508592	-0.159222	0.114739	-0.0231827	-0.392182
SNX2	0.647251	0.225293	-0.305969	0.808899	Color2 [DarkGray]	1	4		-0.211525	0.395889	0.269419	-0.0419761	-0.633337	0.06867	0.110967	-0.358369
YBX3	0.6107	0.245076	0.389727	1.31015	Color2 [DarkGray]	1	4		0.0568138	-0.434847	-0.0516928	-0.228188	-0.518128	0.0996976	0.741448	0.577977
DRG1	0.115618	0.76627	0.027443	1.0192	Color2 [DarkGray]	1	4		-0.0720493	-0.0433155	0.0333786	0.0733134	-0.0591101	0.193884	0.125922	-0.159597
POLR2A	0.142686	0.719969	-0.0426655	0.97086	Color2 [DarkGray]	1	4		0.062797	-0.0345839	0.0440759	-0.0439969	-0.339865	0.169981	0.0690519	-0.0415375
TMPO	0	1	NaN	#VALUE!	Color2 [DarkGray]	1	4		NaN	NaN	NaN	NaN	NaN	NaN	NaN	NaN
CNN3	1.09708	0.0799688	-0.464941	0.7245	Color2 [DarkGray]	1	4		0.256535	-0.115439	0.341703	0.294715	-0.721633	-0.0204579	0.119596	-0.459757
TWF2	1.19939	0.0631847	-0.277984	0.824743	Color2 [DarkGray]	1	4		-0.142551	0.377811	0.213725	0.228952	-0.182903	-0.091468	-0.192393	0.0327671
MYL12A	1.23199	0.0586152	-0.191053	0.875966	Color2 [DarkGray]	1	4		0.20595	0.214786	-0.0441392	0.194428	-0.153458	0.0383735	0.0479456	-0.12605
IPO4	0.0427623	0.906229	0.0217477	1.01519	Color2 [DarkGray]	1	4		0.0875481	-0.141201	0.0988796	-0.291048	0.0649011	-0.479845	0.0646051	0.191508
SEC16A	0.441589	0.361752	-0.17231	0.887421	Color2 [DarkGray]	1	4		0.287883	-0.251023	0.20208	0.0908304	-0.0805111	-0.407481	-0.0930012	0.221524
ANXA7	0.126652	0.747047	-0.1	0.933033	Color2 [DarkGray]	1	4		0.754527	-0.12631	-0.00435567	-0.0654578	0.348447	-0.000920573	0.356674	-0.545798
COL18A1	1.16831	0.0678727	-0.674921	0.626366	Color2 [DarkGray]	1	4		0.668935	-0.296682	0.88497	0.627834	-0.649556	-0.109665	-0.103873	0.0484653
SKIV2L	0.347406	0.449359	0.151106	1.11042	Color2 [DarkGray]	1	4		0.0193391	0.113907	-0.0133178	-0.519282	0.128044	-0.0329725	0.33982	-0.229821
PTPN1	0.448239	0.356255	-0.190524	0.876287	Color2 [DarkGray]	1	4		-0.0162441	0.294109	-0.204472	0.015978	0.113575	-0.243964	-0.589822	0.0474854
TAGLN	0.00347296	0.992035	0.00397899	1.00276	Color2 [DarkGray]	1	4		-0.177834	-1.02138	0.577252	0.304432	0.214992	-0.214273	-0.437577	0.135242
IFIH1	0.108512	0.778911	-0.195993	0.872972	Color2 [DarkGray]	1	4		-0.319994	2.08996	-0.256102	0.276498	0.222672	1.26266	-0.119221	-0.35972
MYO1G	0.118441	0.761305	-0.102871	0.931178	Color2 [DarkGray]	1	4		-0.285505	0.19717	0.0768588	-0.118784	0.450127	-0.305415	-0.918538	0.23208
EEF1B2	0.442549	0.360954	0.320206	1.24851	Color2 [DarkGray]	1	4		-0.48145	-0.217404	0.0290106	-0.0660605	-0.747038	0.440381	0.611849	0.23973
ACAA2	0.281905	0.522511	-0.23999	0.846751	Color2 [DarkGray]	1	4		-0.180403	0.0518044	0.690153	-0.0353255	0.0548088	-0.224733	-0.844186	0.580378
MDH1	0.0681966	0.85468	-0.0456408	0.968859	Color2 [DarkGray]	1	4		0.00848145	-0.346304	0.269037	-0.00791187	-0.577657	0.0861965	0.382161	-0.149961
SUCLG2	0.195328	0.637782	0.104398	1.07505	Color2 [DarkGray]	1	4		-0.0601544	-0.228186	0.509318	-0.0961524	0.452927	-0.156561	0.236167	0.00988618
CACYBP	0.235522	0.581404	-0.191904	0.875449	Color2 [DarkGray]	1	4		0.0561508	0.239038	-0.141699	0.226772	-0.808695	0.731656	-0.21248	-0.0978368
PFKM	0.200026	0.630919	0.0701679	1.04984	Color2 [DarkGray]	1	4		-0.422211	-0.00164242	-0.0197996	0.0773355	0.195995	-0.0395618	-0.199272	-0.0428068
API5	0.398412	0.399566	-0.181616	0.881715	Color2 [DarkGray]	1	4		0.0106012	-0.0972414	-0.00465439	0.0228613	-0.694561	0.219739	-0.316044	-0.00403097
SULT2B1	0.233189	0.584535	-0.210496	0.86424	Color2 [DarkGray]	1	4		-0.397905	0.80008	0.305623	-0.17456	-0.709221	-0.227397	0.228991	0.398884
TXNL1	0.00704981	0.983898	-0.00402557	0.997214	Color2 [DarkGray]	1	4		0.0696872	-0.100843	0.106716	-0.260909	-0.519294	0.290069	0.0826622	-0.0548884
TARDBP	0.248915	0.563748	0.07473	1.05316	Color2 [DarkGray]	1	4		-0.132519	0.046128	0.191359	-0.0748735	-0.141392	0.318486	-0.00165293	0.153573
APMAP	0.0998248	0.794649	0.168944	1.12424	Color2 [DarkGray]	1	4		0.406313	-0.0952369	-0.47568	0.0632973	1.64957	-0.443368	-1.0868	0.455064
OSBPL8	0.319945	0.478691	0.129823	1.09416	Color2 [DarkGray]	1	4		-0.534605	-0.0639708	0.270144	-0.0486541	-0.0511184	0.103269	0.124438	-0.0343807
GIPC1	0.210162	0.616365	-0.169574	0.889105	Color2 [DarkGray]	1	4		-0.130824	0.528418	0.0988006	0.0276032	-0.501513	-0.0398008	0.77527	-0.388255
RAB1A	0.244763	0.569163	-0.0604873	0.95894	Color2 [DarkGray]	1	4		0.0892609	-0.00363263	-0.172906	0.0240284	0.0534382	-0.315373	0.021376	-0.0646404
XPO5	0.0852736	0.821725	0.0321274	1.02252	Color2 [DarkGray]	1	4		-0.167523	0.344117	-0.0743951	0.0122909	0.264893	-0.0235917	-0.09575	0.0974492
FUBP3	0.348848	0.44787	-0.144262	0.904842	Color2 [DarkGray]	1	4		0.165036	-0.157963	-0.0388811	0.164844	-0.58632	0.0333023	0.0332445	0.0757613
ALOX5	0.107201	0.781266	0.19325	1.14334	Color2 [DarkGray]	1	4		0.222235	0.0292443	-0.051568	-0.23063	1.76994	-0.856077	-0.941564	0.769986
PDS5B	0.417151	0.382691	0.0741419	1.05273	Color2 [DarkGray]	1	4		-0.182917	-0.00905928	-0.0123733	0.043066	0.164581	-0.131354	0.0645193	0.0375387
BCL2L13	1.02231	0.0949932	0.479699	1.39445	Color2 [DarkGray]	1	4		-0.681385	-0.316782	0.144638	-0.200222	-0.291593	0.404258	0.452753	0.29963
ACAT1	0.178034	0.663691	-0.0549248	0.962645	Color2 [DarkGray]	1	4		-0.0515768	-0.0253172	0.426661	0.0312684	-0.0606095	-0.0056653	0.105264	0.122347
ATP6V1H	0.209396	0.617453	0.11902	1.086	Color2 [DarkGray]	1	4		-0.699263	0.325387	-0.163816	0.0325245	-0.0149139	-0.180757	0.14583	0.0207538
BTF3	0.113118	0.770694	-0.093903	0.936984	Color2 [DarkGray]	1	4		-0.247029	-0.341948	0.122593	0.0313625	-1.04031	0.169269	0.176203	-0.115792
HEATR1	0.131079	0.73947	0.0498373	1.03515	Color2 [DarkGray]	1	4		-0.0572221	0.0680881	-0.175462	0.228704	0.168878	-0.110763	-0.133036	0.338378
LNPEP	0.12758	0.745452	0.0650296	1.04611	Color2 [DarkGray]	1	4		-0.332976	0.430943	-0.0746649	0.0238949	0.182857	0.287048	0.044002	-0.206591
VSNL1	0.113633	0.76978	0.134392	1.09763	Color2 [DarkGray]	1	4		-0.627106	0.566218	0.189426	-0.258962	-0.661643	0.578366	0.81424	-0.323818
PLXNB2	0.00926095	0.978902	0.00401273	1.00279	Color2 [DarkGray]	1	4		0.230545	-0.361678	0.128287	-0.0508343	-0.0754042	-0.111859	0.18192	-0.0322863
DBN1	1.37127	0.0425332	-0.677212	0.625373	Color2 [DarkGray]	1	4		0.0176342	0.0848765	0.0948634	0.645763	-0.661192	-0.36451	0.0933423	-0.93335
SLC25A4	0.366532	0.43	0.172943	1.12736	Color2 [DarkGray]	1	4		-0.152542	-0.535533	0.326252	0.0490502	0.258388	0.239692	0.016733	-0.135812
ARF4	0.47366	0.336	0.259736	1.19726	Color2 [DarkGray]	1	4		-0.778279	0.37743	-0.0385197	-0.0356425	0.301557	0.024947	0.0656562	0.171773
SNX1	0.28186	0.522565	-0.0848151	0.942905	Color2 [DarkGray]	1	4		0.0740983	-0.0612057	0.190119	-0.0837525	-0.343311	-0.0634093	0.168473	0.0182455
ESRP1	0.0203881	0.95414	-0.0134068	0.99075	Color2 [DarkGray]	1	4		-0.187706	0.044495	-0.287679	0.119365	-0.641638	0.00902112	0.328523	-0.0610576
NCF1	0.00458621	0.989495	-0.00855852	0.994085	Color2 [DarkGray]	1	4		0.643835	0.083917	-0.254852	-0.116704	1.4089	-0.479341	-1.2591	0.651497
ME2	0.0224755	0.949565	-0.019833	0.986347	Color2 [DarkGray]	1	4		-0.445673	0.257334	0.0424062	-0.165018	0.46225	-0.0357796	-0.799091	-0.017662
PPP2CB	0.194924	0.638375	0.114589	1.08267	Color2 [DarkGray]	1	4		-0.0521998	0.0635555	-0.133066	0.241145	0.698448	-0.101932	0.264277	-0.283001
EIF4B	0.192204	0.642386	-0.139075	0.908101	Color2 [DarkGray]	1	4		0.012141	-0.530351	0.0584166	0.144708	-0.933376	0.0548964	0.0601075	-0.0530144
AP2M1	1.17503	0.0668291	-0.185568	0.879303	Color2 [DarkGray]	1	4		0.0396382	0.0589856	0.0725594	0.14536	-0.19216	-0.00873698	0.0598968	-0.28473
RHOA	0.225144	0.595465	0.100265	1.07197	Color2 [DarkGray]	1	4		-0.0677032	0.0620272	0.120269	-0.100465	0.5934	-0.203396	0.0269236	-0.00174152
RETSAT	0.367341	0.429199	0.431511	1.34865	Color2 [DarkGray]	1	4		-0.351202	0.184947	0.152818	-0.282481	1.77262	-0.351106	0.246802	-0.238188
SUGT1	0.48915	0.324228	-0.230047	0.852607	Color2 [DarkGray]	1	4		0.0258006	0.082402	-0.385614	0.149018	-0.761408	0.036372	-0.256914	-0.0666329
AP1G1	0.738717	0.182508	-0.145129	0.904299	Color2 [DarkGray]	1	4		0.0332005	0.112414	0.00475144	-0.0326212	-0.377306	-0.0972527	0.0339173	-0.0221303
MAP1B	0.302161	0.4987	-0.241566	0.845827	Color2 [DarkGray]	1	4		0.172963	-0.559251	0.813343	0.20252	-0.379296	0.432652	-0.0798452	-0.310198
UMPS	0.128662	0.743597	0.0575034	1.04066	Color2 [DarkGray]	1	4		-0.422135	-0.106068	0.00911016	0.169175	-0.329131	-0.0147201	0.213296	0.0106517
TPD52L2	0.00829114	0.98109	-0.00596071	0.995877	Color2 [DarkGray]	1	4		-0.0351014	0.0478959	-0.163652	0.138653	-0.627737	0.140934	-0.0332589	0.484014
MAN2A1	0.558789	0.276192	0.118533	1.08563	Color2 [DarkGray]	1	4		-0.197043	-0.0821413	0.109958	0.00557058	-0.00180953	0.165384	0.235448	-0.0885462
LTBP1	0.672135	0.212748	-0.204899	0.8676	Color2 [DarkGray]	1	4		0.417354	0.0745926	0.203565	-0.106166	-0.0774847	0.21271	-0.11625	-0.249225
PPP2R1B	0.266255	0.541683	-0.105635	0.929396	Color2 [DarkGray]	1	4		0.0582988	0.387835	0.176664	-0.218904	-0.0447756	-0.0281388	0.275839	-0.221569
CKMT1A	0.137602	0.728447	0.0964284	1.06912	Color2 [DarkGray]	1	4		-0.165831	0.015755	0.227891	-0.0428669	-0.340491	-0.302525	0.659712	0.403965
RPL23A	0.13359	0.735207	-0.11489	0.923453	Color2 [DarkGray]	1	4		-0.104592	-0.135457	0.20679	-0.110774	-1.08145	0.226951	0.227943	0.0229607
COLGALT1	0.344274	0.452612	-0.152175	0.899893	Color2 [DarkGray]	1	4		-0.235305	0.426052	-0.0372791	0.00128998	0.0878105	0.122609	-0.39037	-0.273993
NID1	0.25025	0.562018	-0.151507	0.900309	Color2 [DarkGray]	1	4		0.315962	-0.584889	0.502019	0.00531238	-0.137535	0.0854749	-0.227285	-0.0882783
KLKB1	0.189202	0.646841	0.474993	1.38991	Color2 [DarkGray]	1	4		0.21958	0.606564	-0.327657	-0.250602	3.30666	-0.893243	-0.615371	0.349808
RPS7	0.470551	0.338415	0.311258	1.24079	Color2 [DarkGray]	1	4		-0.812789	0.00251237	-0.0239934	-0.215628	-0.588012	0.229077	0.501188	0.0528799
RAB2A	0.0863022	0.819781	-0.0206206	0.985809	Color2 [DarkGray]	1	4		-0.149593	0.157743	-0.0158335	0.215862	-0.0233607	0.0106384	0.0534361	0.084983
ENAH	0.326519	0.471499	-0.383608	0.766518	Color2 [DarkGray]	1	4		0.176854	-0.138539	-0.623016	0.492049	-1.37477	0.451598	0.210959	-0.914876
NUP214	0.16746	0.680049	0.0403398	1.02836	Color2 [DarkGray]	1	4		-0.10006	0.0228238	-0.0448499	0.106628	-0.0783286	0.0979496	0.238995	-0.112714
GSR	0.817383	0.152271	-0.429309	0.742617	Color2 [DarkGray]	1	4		0.307709	-0.274504	0.974941	0.288968	-0.0506469	-0.238037	-0.154847	0.0234077
WNK1	0.0152072	0.96559	0.0134113	1.00934	Color2 [DarkGray]	1	4		-0.0812078	-0.284646	-0.038463	0.223529	-0.838001	0.0328976	0.399194	0.278766
PSMA5	0.178911	0.662352	-0.114682	0.923586	Color2 [DarkGray]	1	4		-0.259559	0.506908	0.0348057	0.0543602	-0.425696	0.475184	0.0380516	-0.20975
VPS26A	0.105895	0.783619	0.0548771	1.03877	Color2 [DarkGray]	1	4		-0.5674	0.135079	-0.0164065	-0.0192493	-0.292952	0.0272223	0.209583	-0.192322
HRG	0.183433	0.655491	0.279105	1.21344	Color2 [DarkGray]	1	4		-0.0187629	0.844975	-0.150106	0.0183671	1.98188	-0.577133	-0.0271364	0.433283
TRIM29	0.0330544	0.926714	0.0270024	1.01889	Color2 [DarkGray]	1	4		0.447404	-0.454516	-0.0625766	0.0254125	-0.396372	0.451533	0.304526	-0.295954
PITPNA	0.179821	0.660965	-0.104075	0.930401	Color2 [DarkGray]	1	4		0.060642	-0.471846	0.0318215	0.0632051	-0.561995	-0.0306115	0.256077	-0.395948
RAP1B	0.704397	0.197516	0.280975	1.21502	Color2 [DarkGray]	1	4		-0.412869	-0.0657535	-0.0319892	0.0669283	0.64929	-0.0436495	0.106445	-0.0318668
PSMB4	0.353875	0.442715	0.109999	1.07923	Color2 [DarkGray]	1	4		-0.224794	0.179006	-0.385536	0.0673264	-0.0443103	0.089734	-0.0261459	0.0567224
ARF5	0.635777	0.231325	0.60248	1.51832	Color2 [DarkGray]	1	4		0.0967801	-0.234984	-0.094938	-0.460656	0.258501	0.395842	1.58916	-0.527383
CLIC4	0.208413	0.618853	0.10406	1.07479	Color2 [DarkGray]	1	4		-0.0499709	0.242907	-0.121705	0.0473067	0.304435	-0.108928	-0.222171	0.56144
SERPINB9	1.15788	0.0695215	-0.519778	0.697479	Color2 [DarkGray]	1	4		0.303674	0.275269	0.435213	-0.211212	-0.444211	0.10353	-0.773429	-0.162057
FKBP5	1.26745	0.0540196	-0.613172	0.653758	Color2 [DarkGray]	1	4		-0.285101	0.59309	0.448034	0.564127	-0.527269	-0.142154	-0.538715	0.0755985
CUL4A	0.224281	0.596649	-0.085752	0.942293	Color2 [DarkGray]	1	4		0.335014	-0.0360013	-0.072614	0.305459	-0.107579	0.0390904	-0.0994805	0.356819
BLVRB	0.83332	0.146784	0.535424	1.44937	Color2 [DarkGray]	1	4		-0.333711	0.0181711	0.00352426	-0.0496199	1.15571	-0.0712482	0.776521	-0.0809217
PEBP1	0.199911	0.631087	-0.197562	0.872023	Color2 [DarkGray]	1	4		0.0192106	-0.218767	0.841962	-0.0798846	-0.885641	0.120045	0.5979	-0.0600306
RPL10	0.13691	0.729608	-0.0631966	0.957141	Color2 [DarkGray]	1	4		-0.0762842	-0.0214622	0.0509096	-0.00546675	-0.580866	0.0695542	0.0113612	0.194861
PPFIA1	0.17382	0.670162	0.0966165	1.06926	Color2 [DarkGray]	1	4		0.00965626	0.114757	-0.113708	-0.108034	0.60079	-0.401638	0.14055	-0.0505649
AK1	0.452609	0.352689	0.0901105	1.06445	Color2 [DarkGray]	1	4		-0.0280602	-0.0628877	-0.0159764	0.0355584	0.00889242	0.0107809	0.32894	-0.0595373
DKC1	1.82453	0.0149786	0.240803	1.18165	Color2 [DarkGray]	1	4		-0.167108	-0.223343	-0.0198787	-0.198545	0.0663408	0.184866	0.16042	-0.0572892
C6orf132	0.186864	0.650334	-0.177093	0.884484	Color2 [DarkGray]	1	4		0.262279	-0.0346506	0.216536	-0.0240657	-0.896752	0.0135186	0.854758	-0.259797
DDX19B	0	1	NaN	#VALUE!	Color2 [DarkGray]	1	4		NaN	NaN	NaN	NaN	NaN	NaN	NaN	NaN
ADH5	1.55132	0.028098	-0.26141	0.834272	Color2 [DarkGray]	1	4		-0.0352929	0.18798	0.259087	0.0542464	-0.310276	-0.130029	-0.131662	-0.00765181
ARPC1A	0.162674	0.687584	0.1248	1.09036	Color2 [DarkGray]	1	4		-0.116945	-0.0289448	-0.012211	-0.0234499	-0.6574	0.149593	0.781159	0.0442977
RPS15	0.552276	0.280365	0.484225	1.39883	Color2 [DarkGray]	1	4		-0.552785	-0.284118	0.217725	-0.376057	-0.850588	0.842164	0.544495	0.405594
RAB5C	0.330126	0.467599	0.11836	1.0855	Color2 [DarkGray]	1	4		-0.487292	0.0221495	-0.0948657	0.035794	0.0511694	-0.00116023	0.165341	-0.266125
OSTF1	0.309834	0.489966	-0.0825211	0.944406	Color2 [DarkGray]	1	4		-0.190827	0.0190105	0.0761506	0.161573	0.0474337	-0.30092	0.0586438	-0.0693343
POF1B	0.833506	0.146721	0.976076	1.96711	Color2 [DarkGray]	1	4		-0.892676	-1.21586	0.18717	0.105751	-0.388731	-0.128406	1.03032	1.57551
TXLNA	0.268592	0.538775	-0.143571	0.905276	Color2 [DarkGray]	1	4		0.515467	-0.0763887	-0.103348	0.0396696	-0.531668	0.235572	0.0270181	0.0701943
PRDX4	0.243421	0.570925	0.0698764	1.04963	Color2 [DarkGray]	1	4		0.087536	-0.125251	0.156894	-0.067558	0.0573157	-0.00742871	-0.0782685	0.359508
CYBB	0.0367594	0.918841	0.0829401	1.05917	Color2 [DarkGray]	1	4		0.618096	0.0726663	-0.287244	-0.104007	1.80513	-0.913261	-1.31902	1.05842
ACBD3	0.177871	0.663941	-0.103726	0.930626	Color2 [DarkGray]	1	4		0.561695	-0.136531	-0.118859	-0.0158624	-0.458783	0.194031	0.206938	-0.0666485
NOLC1	0.224777	0.595968	-0.212433	0.863081	Color2 [DarkGray]	1	4		0.530305	-0.271554	-0.0540933	0.284187	-0.944581	0.658137	0.12772	-0.202162
DYNC1LI1	0.733494	0.184717	0.241004	1.18181	Color2 [DarkGray]	1	4		-0.215212	0.19152	-0.0448801	-0.0296014	0.445653	0.438545	0.0988507	-0.117206
PSMA2	0.0404	0.911171	-0.02524	0.982657	Color2 [DarkGray]	1	4		-0.419812	0.354961	-0.186622	0.0569009	-0.438794	0.118175	0.168873	-0.143786
CSNK1A1	0	1	NaN	#VALUE!	Color2 [DarkGray]	1	4		NaN	NaN	NaN	NaN	NaN	NaN	NaN	NaN
AIMP1	0.291684	0.510877	-0.156501	0.897198	Color2 [DarkGray]	1	4		-0.0525808	0.0698675	0.00186395	-0.0377221	-0.825895	0.105992	0.0563204	0.0190061
LASP1	0.675846	0.210938	-0.339074	0.790548	Color2 [DarkGray]	1	4		0.506744	-0.227538	0.0402392	0.19061	-0.773146	0.00173203	-0.0210134	-0.0538147
AKR1C2	0.309364	0.490497	0.39364	1.3137	Color2 [DarkGray]	1	4		-0.821944	-0.26597	0.277268	0.199506	-0.387952	-0.627326	0.536608	1.44209
LUC7L2	0.591694	0.256039	-0.275199	0.826337	Color2 [DarkGray]	1	4		0.0321125	-0.260803	0.0658265	0.0330089	-0.879905	-0.00105559	-0.332506	-0.0171827
ACSL3	0.765938	0.17142	-0.260161	0.834994	Color2 [DarkGray]	1	4		-0.0661328	0.0634716	0.512085	0.19243	-0.052956	0.105894	0.0165189	-0.408249
SLC25A12	1.02303	0.094836	0.269115	1.20507	Color2 [DarkGray]	1	4		-0.291186	-0.537466	0.0596234	-0.0372813	0.125435	0.02655	0.051482	0.0666823
NAE1	0.725221	0.188269	0.251809	1.1907	Color2 [DarkGray]	1	4		-0.34837	0.256402	-0.0557977	-0.273173	0.0796617	-0.11203	0.29351	0.325154
CTSC	0.279986	0.524824	-0.196735	0.872523	Color2 [DarkGray]	1	4		-0.408845	0.942893	0.0187233	0.0178376	0.00543952	0.0495687	-0.045284	-0.226057
OAT	0.105954	0.783513	0.0880003	1.0629	Color2 [DarkGray]	1	4		-0.263994	-0.699558	0.217661	0.282756	0.377117	0.14224	-0.0558374	-0.574653
XRN2	0.106872	0.781859	-0.0692082	0.953161	Color2 [DarkGray]	1	4		-0.0142881	-0.0979634	0.260406	0.0141174	-0.512046	0.21744	-0.291838	0.471883
SSRP1	0.0726267	0.846006	0.0284264	1.0199	Color2 [DarkGray]	1	4		-0.307274	0.0154758	0.0491263	-0.0425792	-0.0813903	0.10549	-0.35054	0.154896
YBX3	0.124394	0.75094	0.0902505	1.06456	Color2 [DarkGray]	1	4		-0.0277302	-0.396448	-0.0774259	0.0268066	-0.787721	0.16852	0.293301	0.212105
LSP1	0.552161	0.280439	-0.453404	0.730318	Color2 [DarkGray]	1	4		0.663162	-0.303524	-0.0100251	0.299209	-0.160689	0.00481178	-1.22618	0.217267
AFG3L2	0.921379	0.119845	0.215999	1.16151	Color2 [DarkGray]	1	4		0.0382243	-0.255751	0.0410508	-0.325382	0.14179	-0.00728757	-0.0372846	0.264919
FBL	0.226789	0.593213	-0.131063	0.913158	Color2 [DarkGray]	1	4		-0.185271	-0.230568	0.388307	0.185425	-0.606745	0.216265	0.0149959	0.00912435
SET	0.272888	0.533473	-0.156031	0.897491	Color2 [DarkGray]	1	4		-0.594223	0.1295	0.0934635	0.275683	-0.439112	0.191051	-0.292177	-0.179465
OPTN	1.18147	0.0658465	-0.583231	0.667467	Color2 [DarkGray]	1	4		0.18569	0.622574	-0.0342862	0.224493	-0.935275	0.0288409	-0.0363402	-0.391676
TSTA3	0.570173	0.269046	0.229022	1.17204	Color2 [DarkGray]	1	4		-0.299846	0.136537	-0.283029	-0.119293	-0.281456	0.102421	0.491007	0.0384867
AZGP1	0.226914	0.593043	-0.272366	0.82796	Color2 [DarkGray]	1	4		-0.495073	0.499462	0.44277	0.0524062	0.800569	-1.26132	0.0130193	-0.142167
ARFGAP1	0.591964	0.25588	0.169101	1.12436	Color2 [DarkGray]	1	4		0.0659045	-0.110579	-0.121938	-0.0279936	-0.229009	0.269733	0.0972614	0.343811
FAM129A	0.00240369	0.994481	0.00100878	1.0007	Color2 [DarkGray]	1	4		0.438403	-0.135227	-0.0443199	-0.127616	0.101789	0.0589871	0.0079096	-0.0334105
EXOC2	0.127111	0.746258	0.0208903	1.01459	Color2 [DarkGray]	1	4		0.0635032	-0.0185305	0.0041553	-0.0501898	0.00211109	-0.0561849	0.186415	-0.0498411
MINK1	0.727084	0.187463	0.251948	1.19081	Color2 [DarkGray]	1	4		-0.222457	-0.142217	0.110757	0.0330486	-0.0336984	-0.0456511	0.59093	0.275344
RPL15	0.223625	0.597551	0.194367	1.14422	Color2 [DarkGray]	1	4		-1.04149	-0.0650079	0.113091	-0.137685	-0.773842	0.189097	0.236678	-0.00555834
EPB41L2	0.651303	0.223201	-0.305492	0.809166	Color2 [DarkGray]	1	4		-0.0568631	-0.108845	0.636757	0.519979	-0.335716	0.0839973	0.176103	-0.155322
HSDL2	0.462555	0.344703	0.195612	1.14521	Color2 [DarkGray]	1	4		-0.381159	-0.282384	0.156828	0.0450542	0.363244	-0.286356	0.0211315	0.222768
RHOG	0.238459	0.577486	0.20487	1.15258	Color2 [DarkGray]	1	4		-0.0735203	0.300424	-0.128647	0.0683655	1.19139	-0.343705	-0.070285	0.2087
GAK	1.99767	0.0100538	-0.239126	0.847258	Color2 [DarkGray]	1	4		0.101157	0.188234	-0.0148454	0.12491	-0.184019	-0.255372	-0.0553521	-0.0623071
TPM1	0.225724	0.59467	-0.379016	0.768962	Color2 [DarkGray]	1	4		0.142998	-1.48586	1.35846	0.396126	-1.06942	-0.123101	-0.413013	0.501194
PDCD4	0.03162	0.92978	-0.0313119	0.97853	Color2 [DarkGray]	1	4		-0.555905	-0.179904	0.949188	0.143893	-0.0717276	0.107015	0.36279	-0.166054
PPP2R5D	0.248884	0.563788	0.0809774	1.05773	Color2 [DarkGray]	1	4		-0.338277	0.185009	-0.0726487	0.0304088	0.22583	-0.124274	0.0520439	-0.0251982
MCM5	0.169779	0.676427	-0.0891858	0.940053	Color2 [DarkGray]	1	4		0.0122018	0.277202	-0.198117	-0.0115772	-0.176751	0.111047	-0.514982	0.303653
SON	0.781943	0.165218	-0.177839	0.884026	Color2 [DarkGray]	1	4		0.337238	-0.0841523	0.0587353	0.104986	-0.139472	0.109624	-0.0446355	-0.220064
STRN	0.423612	0.37704	0.0873838	1.06244	Color2 [DarkGray]	1	4		-0.0339219	0.00143122	-0.0228997	-0.129555	0.112434	-0.179598	0.229554	0.00220056
NT5C2	0.377943	0.418849	0.251028	1.19006	Color2 [DarkGray]	1	4		-1.06685	0.220751	0.0254172	-0.14729	-0.046141	0.0359856	0.134795	-0.0884996
PHGDH	0.601111	0.250547	0.664997	1.58557	Color2 [DarkGray]	1	4		-0.863458	-1.33695	0.0367243	0.591289	0.371697	-0.222015	1.05373	-0.115812
FAM83G	0.112187	0.772347	-0.11679	0.922237	Color2 [DarkGray]	1	4		-0.0750157	-0.0526605	-0.479204	0.126286	-1.32637	0.0600014	0.134749	0.183865
HMGB2	0.919039	0.120493	-0.491236	0.711415	Color2 [DarkGray]	1	4		0.642521	-0.26761	0.041741	0.122722	-0.662514	0.0696823	-0.71151	-0.12123
CSTA	0.24581	0.567792	0.326594	1.25405	Color2 [DarkGray]	1	4		-1.08799	0.0935504	0.665953	-0.793312	-0.873793	0.520308	0.707301	-0.169242
ARHGDIA	1.83034	0.0147794	-0.488915	0.712561	Color2 [DarkGray]	1	4		0.333134	0.549295	0.091201	0.132806	-0.483964	-0.104865	-0.0326995	-0.227693
HADH	0.174414	0.669247	0.0948456	1.06795	Color2 [DarkGray]	1	4		-0.477984	-0.197424	0.447154	-0.0223849	0.272696	0.0118442	-0.0997833	-0.0560131
CBR3	0.381812	0.415134	-0.320973	0.80053	Color2 [DarkGray]	1	4		-0.130183	0.267689	0.118778	0.140953	-1.02081	-0.137691	0.696965	-0.425124
UBE2L3	0.534858	0.291838	-0.199412	0.870905	Color2 [DarkGray]	1	4		0.284172	-0.00225284	0.0903035	-0.024529	-0.38129	0.324829	-0.0956711	-0.297824
NOP2	0.590604	0.256682	0.289463	1.22219	Color2 [DarkGray]	1	4		0.120079	-0.432223	-0.356661	0.0960971	-0.0660486	0.168972	-0.159346	0.641566
DDX42	0.535673	0.291291	0.0923647	1.06612	Color2 [DarkGray]	1	4		-0.223933	-0.0355002	0.114742	-0.0483552	0.123791	0.0999547	-0.0126649	-0.0346683
40787	1.45245	0.0352814	-0.425723	0.744466	Color2 [DarkGray]	1	4		0.399579	-0.0647403	0.45654	0.188862	-0.42715	0.0661521	-0.119375	-0.242278
MZB1	0.197247	0.63497	-0.338802	0.790697	Color2 [DarkGray]	1	4		0.0463627	-0.21963	1.21846	0.237177	-0.460437	-0.0156698	-1.2197	1.62297
NCF2	0.0139176	0.968462	-0.0269895	0.981466	Color2 [DarkGray]	1	4		0.29802	0.1078	-0.491411	-0.144371	1.38201	-0.756452	-1.45089	0.487412
PPFIBP1	0.312086	0.487432	0.101669	1.07301	Color2 [DarkGray]	1	4		0.0177533	-0.13719	-0.227561	0.214895	-0.206664	0.249502	0.0932236	0.13851
SPRR3	0.0386181	0.914917	-0.101138	0.932298	Color2 [DarkGray]	1	4		0.640298	-1.23403	1.36253	-0.0343857	-0.781516	0.0237151	2.13382	-1.04616
USP47	0.295956	0.505876	0.0779656	1.05553	Color2 [DarkGray]	1	4		-0.123962	0.108839	-0.019129	-0.309477	-0.190882	0.0819365	0.093768	-0.0166892
CKB	0.577183	0.264738	0.674416	1.59595	Color2 [DarkGray]	1	4		-0.436443	-0.448511	-0.88267	1.06878	-0.387968	0.339671	0.858673	1.18845
ATP13A1	0.483326	0.328605	-0.134507	0.910981	Color2 [DarkGray]	1	4		-0.167595	0.031456	0.277374	0.00637659	-0.252803	-0.017425	-0.230582	0.110392
TBL3	0.865363	0.136344	0.192277	1.14257	Color2 [DarkGray]	1	4		-0.295818	0.119568	-0.0750272	-0.159732	0.273858	0.1233	-0.0345473	-0.00451136
ACTBL2	0.75245	0.176828	0.407237	1.32614	Color2 [DarkGray]	1	4		-0.121346	0.0768629	-0.198324	-0.0995585	1.08607	-0.0709258	0.164757	0.106679
MAPK3	0.3021	0.49877	0.101379	1.0728	Color2 [DarkGray]	1	4		-0.197544	0.0736281	0.10849	-0.105084	-0.0655495	-0.162865	0.383522	0.129897
PTGFRN	0.047084	0.897255	-0.0290924	0.980037	Color2 [DarkGray]	1	4		0.108229	-0.331048	-0.0526304	0.208302	0.076659	0.393353	-0.209069	-0.44446
RAB1B	0.0335221	0.925716	-0.0162972	0.988767	Color2 [DarkGray]	1	4		0.466154	-0.166919	-0.157881	0.0210908	0.191392	-0.121165	0.12293	-0.0958998
PDHA1	0.069029	0.853043	-0.0195307	0.986554	Color2 [DarkGray]	1	4		-0.0270468	0.106044	0.280195	-0.016964	0.0230428	-0.0934735	0.0862618	0.248275
TFG	0.0375927	0.91708	0.0173991	1.01213	Color2 [DarkGray]	1	4		-0.323024	0.0183175	-0.0173139	0.371716	0.0422883	0.220288	-0.00603794	-0.137247
NBAS	1.29135	0.0511269	0.173784	1.12801	Color2 [DarkGray]	1	4		-0.240086	-0.0168469	0.037402	-0.158846	0.168681	0.0204593	0.0457275	0.0818914
PADI4	0.00886845	0.979787	0.0220164	1.01538	Color2 [DarkGray]	1	4		1.08686	-0.159493	-0.326161	0.118001	2.25924	-0.665496	-1.2442	0.457731
RPS9	0.0633247	0.864321	0.0235841	1.01648	Color2 [DarkGray]	1	4		-0.340945	0.128057	0.0648533	-0.124337	-0.280201	0.0331242	0.0662643	0.00277691
YWHAH	1.38743	0.04098	-0.507973	0.70321	Color2 [DarkGray]	1	4		0.388969	0.51282	0.0114904	0.35349	-0.0401552	-0.0171866	-0.0253484	-0.682431
EMILIN1	0.432091	0.369751	-0.425722	0.744466	Color2 [DarkGray]	1	4		0.313456	-0.796181	1.18545	0.270837	-0.352256	-0.359944	0.322601	-0.339723
ARAP1	0.644752	0.226594	0.307508	1.23757	Color2 [DarkGray]	1	4		-0.0593615	0.0895589	0.0522413	-0.134334	0.392349	-0.0607398	-0.0375655	0.884094
PRPF40A	0.205972	0.62234	-0.105121	0.929727	Color2 [DarkGray]	1	4		-0.0931865	0.00719481	-0.0287491	0.155279	-0.568847	0.356713	-0.206811	0.0389992
FAF2	1.80446	0.0156869	-0.36798	0.774867	Color2 [DarkGray]	1	4		0.32195	0.0258722	0.0633072	0.129565	-0.228412	-0.0229152	-0.456	-0.223896
MYCBP2	0.462594	0.344672	0.149802	1.10942	Color2 [DarkGray]	1	4		-0.0202004	-0.102344	-0.00179257	0.0539661	0.0266452	-0.194386	0.47537	0.221206
GSTK1	0.302048	0.49883	-0.205658	0.867143	Color2 [DarkGray]	1	4		-0.453982	0.842813	0.0174833	0.0803659	0.168141	-0.0234337	-0.235573	-0.245086
EEF1D	0	1	NaN	#VALUE!	Color2 [DarkGray]	1	4		NaN	NaN	NaN	NaN	NaN	NaN	NaN	NaN
DPYD	0.648801	0.224491	-0.19855	0.871426	Color2 [DarkGray]	1	4		0.0508937	-0.0366108	0.335348	0.25411	0.00979394	-0.267153	0.260986	-0.194087
PNPT1	0.120927	0.75696	0.0735895	1.05233	Color2 [DarkGray]	1	4		0.104407	0.0217643	-0.0437471	-0.0666754	0.508646	0.397356	-0.423225	-0.17267
GCA	0.0538902	0.883303	0.116614	1.08419	Color2 [DarkGray]	1	4		0.022741	0.594516	-0.602898	-0.0220623	1.73839	-0.557575	-1.52267	0.800604
CYB5R1	1.16699	0.0680777	0.461414	1.37689	Color2 [DarkGray]	1	4		-0.070455	-0.196609	-0.532823	-0.0133048	0.675999	0.00273056	0.403103	-0.0493686
TPSAB1	0.0900521	0.812733	-0.18031	0.882513	Color2 [DarkGray]	1	4		-0.535239	-0.710481	2.3836	0.048804	-0.0263459	-0.159211	0.153356	0.497646
ADSS	0.57934	0.263427	-0.197288	0.872189	Color2 [DarkGray]	1	4		0.14036	0.0419453	-0.106051	0.133082	-0.278474	-0.0399234	-0.475758	0.214342
APRT	0.336903	0.46036	0.0974476	1.06988	Color2 [DarkGray]	1	4		-0.285401	0.00884815	0.0174806	-0.0611368	0.0248536	-0.24258	0.252668	0.0346395
TLN2	0.341352	0.455667	-0.270638	0.828953	Color2 [DarkGray]	1	4		0.240936	-0.707576	0.50379	0.0337779	-0.901157	-0.0464383	-0.102181	0.0381532
OGA	0.689292	0.204507	-0.201239	0.869803	Color2 [DarkGray]	1	4		-0.0181262	0.379046	-0.0164935	0.0116746	0.0414698	0.0525576	-0.158066	-0.384817
PARP9	0.188915	0.647269	-0.108378	0.92763	Color2 [DarkGray]	1	4		-0.0377663	0.518444	-0.0760543	0.137548	0.0967648	0.506185	-0.216133	-0.278159
NUP153	0.43544	0.36691	-0.227332	0.854213	Color2 [DarkGray]	1	4		-0.0199413	-0.279177	0.11303	0.138998	-0.86116	0.0499419	-0.161064	0.0158635
NOLC1	0.542185	0.286956	0.211325	1.15775	Color2 [DarkGray]	1	4		-0.207192	-0.26859	0.00968837	-0.0457786	-0.319882	0.479446	0.190057	-0.0161931
HNRNPDL	0.427158	0.373975	0.234425	1.17644	Color2 [DarkGray]	1	4		-0.728155	-0.0445642	0.163884	0.0168034	-0.29699	0.294803	0.0367783	0.311078
TXN	0.295801	0.506057	-0.35765	0.780435	Color2 [DarkGray]	1	4		0.534432	-0.686703	0.454536	-0.26343	-1.26112	0.398686	0.297665	-0.826993
SERPINF1	0.0516146	0.887944	-0.0513374	0.965041	Color2 [DarkGray]	1	4		-0.304656	0.0871718	0.237089	0.0422016	0.874233	-0.479827	0.0242557	-0.562205
QSOX1	0.22631	0.593868	0.151657	1.11084	Color2 [DarkGray]	1	4		-0.671939	0.0905751	-0.186088	0.104072	0.0145775	-0.565248	0.114916	0.379
CAPRIN1	0.0320321	0.928898	-0.0271633	0.981348	Color2 [DarkGray]	1	4		0.100756	-0.238418	-0.0652885	0.0279499	-0.872178	0.111736	0.0243352	0.452454
LOC102724334	0.81792	0.152083	-0.35298	0.782965	Color2 [DarkGray]	1	4		0.529985	0.0412987	0.473012	-0.0696913	-0.339818	-0.0943915	-0.322086	0.318982
RPS4Y1	0.214929	0.609636	-0.356739	0.780928	Color2 [DarkGray]	1	4		0.0995183	-1.48889	1.36136	0.659382	-0.0427048	0.433281	-0.835087	-0.351077
ROCK2	0.039226	0.913638	-0.00966942	0.99332	Color2 [DarkGray]	1	4		0.188777	-0.0130661	0.0114184	-0.0267018	0.23322	0.0049417	-0.0594167	-0.0569951
FKBP9	0.149412	0.708905	-0.0505009	0.965601	Color2 [DarkGray]	1	4		0.109202	-0.0410891	-0.218754	0.0357254	-0.12591	0.0439579	-0.362308	0.127341
ERLIN2	0.105916	0.783581	0.0986885	1.0708	Color2 [DarkGray]	1	4		0.204533	-0.0228305	0.00121541	-0.350942	0.869082	-0.618351	0.245714	-0.269715
ENDOD1	0.358279	0.438249	0.228114	1.1713	Color2 [DarkGray]	1	4		-0.651772	-0.00707316	-0.0143544	0.241199	-0.0154247	0.0834004	0.672629	-0.260148
ILVBL	0.105346	0.784611	0.061944	1.04387	Color2 [DarkGray]	1	4		-0.201911	0.355194	0.242461	-0.342166	-0.0522437	0.0967771	0.44392	-0.1871
CAB39	0.280775	0.523872	-0.12264	0.918505	Color2 [DarkGray]	1	4		-0.0973005	0.312774	-0.100416	0.138184	-0.483519	0.218714	0.0680451	-0.0405596
PON1	0.251413	0.560515	0.539679	1.45365	Color2 [DarkGray]	1	4		-0.438046	1.09964	-0.110801	0.069198	2.93319	-0.823239	-0.0616466	0.730408
RHOC	0.220182	0.602307	-0.158026	0.89625	Color2 [DarkGray]	1	4		-0.14633	0.724308	-0.142343	0.0963778	0.433101	0.193475	-0.360552	-0.366115
SACM1L	0.150227	0.707575	0.0716744	1.05094	Color2 [DarkGray]	1	4		-0.290866	0.0328598	-0.0151558	-0.0204991	0.354992	-0.448828	0.0765224	0.01035
ILK	0.0102587	0.976655	-0.00623915	0.995685	Color2 [DarkGray]	1	4		0.172723	-0.0272825	0.00328817	0.14783	0.647816	-0.00872184	-0.220971	-0.146521
HDAC2	0.222501	0.599099	-0.0883821	0.940577	Color2 [DarkGray]	1	4		-0.041071	0.140088	-0.0822151	0.289656	-0.350963	0.0696361	-0.0577338	0.29199
CBX3	0.590355	0.25683	-0.182098	0.881421	Color2 [DarkGray]	1	4		0.08201	-0.0526085	0.0319477	-0.0193595	-0.592933	0.0337048	-0.0640353	-0.0631373
SHTN1	0.861338	0.137614	-0.365921	0.775974	Color2 [DarkGray]	1	4		0.196266	0.0775367	-0.104134	0.172509	-0.770255	-0.146034	0.189535	-0.394752
GBE1	0.329949	0.46779	0.0927539	1.0664	Color2 [DarkGray]	1	4		-0.0683599	-0.206403	0.0551161	0.0321446	0.0425989	-0.132577	0.337957	-0.0644666
GRHPR	0.0548014	0.881452	-0.0450095	0.969283	Color2 [DarkGray]	1	4		-0.68165	0.075421	0.119697	0.307814	-0.512249	0.4106	-0.108513	-0.148594
FTH1	0.163244	0.686683	-0.215544	0.861222	Color2 [DarkGray]	1	4		-0.448452	-0.58744	0.430148	0.761282	0.393853	-0.49159	-1.12488	0.515983
COPS5	0.14343	0.718736	0.0267215	1.01869	Color2 [DarkGray]	1	4		0.00282171	-0.0815742	0.00776712	0.162384	0.0242368	0.146395	0.104727	-0.0770738
UBE2O	0.104607	0.785947	0.0541031	1.03821	Color2 [DarkGray]	1	4		-0.476069	0.216974	0.0940732	0.000673843	0.0186451	-0.115648	0.334811	-0.185745
PTBP3	0.640474	0.228837	0.225556	1.16923	Color2 [DarkGray]	1	4		-0.367126	0.117969	-0.0391612	-0.231627	0.260484	-0.201167	0.361346	-0.0383842
TBC1D2	1.11692	0.0763983	-0.395362	0.760298	Color2 [DarkGray]	1	4		0.335027	0.161581	-0.00139012	0.209177	-0.220858	-0.00393749	0.050177	-0.702437
MTCH2	0.719437	0.190793	0.304367	1.23488	Color2 [DarkGray]	1	4		0.0415163	-0.164692	-0.0144414	-0.108632	0.601244	-0.254884	0.0890911	0.535769
HLA-B	0.680935	0.20848	-0.531869	0.691658	Color2 [DarkGray]	1	4		0.164182	0.980286	-0.0919344	-0.144528	0.174557	0.0828593	-1.00535	-0.471535
SOD1	0.398275	0.399691	0.234767	1.17672	Color2 [DarkGray]	1	4		-0.895492	0.155298	-0.0157558	-0.0198993	-0.145928	0.131287	0.290526	-0.112666
HIBCH	0.731104	0.185736	0.623064	1.54014	Color2 [DarkGray]	1	4		-0.743118	-0.887844	0.527196	-0.157527	0.15241	-0.111796	1.08281	0.10754
CRKL	0.264681	0.543649	0.0747924	1.05321	Color2 [DarkGray]	1	4		-0.119672	0.0835017	-0.243283	-0.0173398	0.230744	0.00679466	-0.223339	-0.0118225
AK2	0.288162	0.515037	0.172562	1.12706	Color2 [DarkGray]	1	4		-0.310912	-0.3282	0.261319	-0.15896	-0.559078	0.334281	0.313959	0.0643318
UCHL3	0.072697	0.845869	0.0254115	1.01777	Color2 [DarkGray]	1	4		0.0260524	-0.0570525	-0.196994	0.144355	-0.282473	0.00507127	0.185794	0.109615
IDH3B	0.70665	0.196495	0.28777	1.22075	Color2 [DarkGray]	1	4		-0.323113	0.0230189	0.181881	-0.481031	0.301301	0.373508	0.0599083	-0.182882
PDXK	0.500536	0.315838	-0.111759	0.925459	Color2 [DarkGray]	1	4		-0.0116459	0.368014	-0.0128395	0.054776	-0.025473	0.00764087	0.0975125	-0.128412
LOC102724985	0.692508	0.202998	-0.2559	0.837465	Color2 [DarkGray]	1	4		0.140236	0.0956565	-0.0772832	-0.0575996	0.143386	-0.519882	-0.520267	-0.0258265
ITGA3	0.327695	0.470224	-0.161426	0.894141	Color2 [DarkGray]	1	4		0.161388	0.625102	-0.183336	-0.144593	0.0631549	0.131791	-0.296696	-0.0853917
CFI	0.287104	0.516292	0.367648	1.29025	Color2 [DarkGray]	1	4		-0.079981	0.84636	-0.133554	0.0740304	1.7779	-0.357533	-0.0691778	0.826259
EIF6	0.00387914	0.991108	0.00214829	1.00149	Color2 [DarkGray]	1	4		-0.425853	0.0801568	-0.0866296	0.0476004	-0.484858	0.131824	-0.138949	0.11585
PRKAR2A	0.251248	0.560727	-0.122698	0.918469	Color2 [DarkGray]	1	4		0.00483543	-0.23689	0.26261	-0.00433807	-0.428459	-0.383518	0.259163	0.0882409
LPP	0.553081	0.279846	-0.179057	0.88328	Color2 [DarkGray]	1	4		0.119913	-0.200635	0.234037	0.0683775	-0.138837	0.0308483	0.0686113	-0.45516
AK3	0.108345	0.77921	0.0894415	1.06396	Color2 [DarkGray]	1	4		-0.287911	-0.0551981	0.37032	0.0268224	-0.472528	0.80829	0.20555	-0.129513
MON2	0.628161	0.235418	0.14462	1.10544	Color2 [DarkGray]	1	4		-0.335003	0.0107147	-0.299692	0.0866462	0.0805066	-0.00722767	-0.0273383	-0.00479329
H2AFY2	0.0960023	0.801674	-0.0967292	0.935151	Color2 [DarkGray]	1	4		0.0684001	-0.705064	0.568575	0.124418	-0.712745	0.523003	0.040987	-0.181833
CAPZA2	0.512427	0.307308	-0.157003	0.896887	Color2 [DarkGray]	1	4		-0.21012	0.114615	0.0915058	0.238385	-0.171838	0.144933	-0.0253756	-0.341344
GAPVD1	0.469207	0.339464	-0.1246	0.917258	Color2 [DarkGray]	1	4		0.0921501	0.0717589	-0.182163	0.128208	0.111104	-0.34527	-0.0176405	-0.13664
PTPA	0.180076	0.660578	-0.105375	0.929563	Color2 [DarkGray]	1	4		-0.504752	0.248706	-0.026679	0.275254	-0.220837	0.0213928	0.203428	-0.432953
KIF13B	0.560636	0.27502	-0.225435	0.855337	Color2 [DarkGray]	1	4		-0.00842133	0.557043	-0.145703	0.108349	-0.234669	-0.332327	0.118811	0.0577113
GTPBP4	0.611113	0.244843	0.105633	1.07597	Color2 [DarkGray]	1	4		-0.0935044	-0.0919041	-0.0677453	0.13983	0.0908732	0.177483	-0.093088	0.133941
EHD3	0.3379	0.459304	0.197337	1.14658	Color2 [DarkGray]	1	4		-0.0449239	-0.504861	0.0973643	0.0427077	0.578723	-0.294229	0.303977	-0.208838
CSRP1	0.190793	0.644477	-0.0825767	0.944369	Color2 [DarkGray]	1	4		0.0260705	-0.359818	0.256995	0.0261006	-0.417666	0.0219956	0.0848979	-0.0701855
CD44	0.559654	0.275643	0.128989	1.09353	Color2 [DarkGray]	1	4		-0.0942179	-0.153678	0.0400636	0.11585	-0.0368583	0.362837	0.0323883	0.0656086
GLOD4	0.0776953	0.83619	-0.0442218	0.969813	Color2 [DarkGray]	1	4		-0.370915	-0.0768396	0.214941	0.0232146	-0.557382	-0.0351189	0.221826	-0.0158107
CCDC47	0.146281	0.714034	0.0497594	1.03509	Color2 [DarkGray]	1	4		0.112896	-0.302602	-0.17908	0.168597	-0.168735	0.122904	-0.00813938	0.0528179
PSMD4	0.704555	0.197445	0.240393	1.18131	Color2 [DarkGray]	1	4		-0.027999	-0.28846	0.0324014	-0.152709	-0.257309	0.252927	0.449195	0.0799898
HIST3H2BB	0.23399	0.583459	-0.135895	0.910105	Color2 [DarkGray]	1	4		-0.299543	0.139371	0.587688	-0.0459692	-0.0980886	0.034989	-0.389257	0.290323
ATP5PD	1.35279	0.0443827	-0.145546	0.904037	Color2 [DarkGray]	1	4		0.128518	0.0780379	0.101461	-0.0864745	-0.124049	-0.10601	-0.131676	0.00109288
IGLL5	0.175447	0.667656	0.210548	1.15713	Color2 [DarkGray]	1	4		-0.256121	0.35556	0.147811	-0.204247	1.43439	-0.359805	-0.512002	0.322616
FAT2	0.00618614	0.985857	0.00436521	1.00303	Color2 [DarkGray]	1	4		-0.174727	0.596483	-0.259043	-0.036032	0.248692	0.149403	0.105173	-0.359126
SMCHD1	0.288057	0.515161	-0.105008	0.9298	Color2 [DarkGray]	1	4		0.108214	-0.0114767	-0.00996929	-0.130963	0.0814487	-0.0797119	-0.533416	0.0674545
SH3GL1	0.303785	0.496838	-0.219025	0.859146	Color2 [DarkGray]	1	4		-0.0145024	0.0319429	0.0421416	-0.083799	-1.04331	0.0447815	0.364109	-0.265895
TPD52L2	0.354262	0.442321	0.280732	1.21481	Color2 [DarkGray]	1	4		0.172528	0.0188759	-0.232918	-0.0763953	0.195896	-0.416304	0.064212	1.16121
LUZP1	0.273324	0.532937	-0.127068	0.915691	Color2 [DarkGray]	1	4		0.188425	0.0932643	-0.122071	-0.128856	-0.35277	0.29502	-0.459794	0.0400348
UBQLN2	0.438127	0.364647	0.232206	1.17463	Color2 [DarkGray]	1	4		0.074025	-0.181501	-0.0248948	-0.0143356	0.822439	0.00377095	0.217247	-0.261338
GSS	0.0731433	0.845	-0.0354971	0.975696	Color2 [DarkGray]	1	4		0.248715	-0.324159	-0.114691	0.0236708	-0.43727	-0.0356043	0.141133	0.0232884
SEC23IP	1.28861	0.0514505	-0.302772	0.810693	Color2 [DarkGray]	1	4		0.12101	-0.0963624	0.171743	0.269912	-0.320306	0.0502959	-0.371285	-0.103492
RABGGTA	1.32534	0.0472784	-0.367819	0.774953	Color2 [DarkGray]	1	4		0.106172	0.417063	0.137137	0.0187556	-0.225218	-0.0997397	0.0494531	-0.516643
PAPSS1	1.37486	0.0421834	-0.258831	0.835765	Color2 [DarkGray]	1	4		0.144171	0.260206	-0.0171678	0.05912	-0.372322	0.0119701	-0.134407	-0.0942355
PSMD14	0.28555	0.518144	-0.0804007	0.945795	Color2 [DarkGray]	1	4		-0.221447	0.183647	0.0766365	-0.0100066	-0.299331	0.0139498	0.0586052	-0.0659967
YLPM1	0.137422	0.728749	-0.0311295	0.978654	Color2 [DarkGray]	1	4		0.155902	-0.184387	0.0315038	0.12855	0.0124702	0.0339976	0.0653617	-0.104778
VAPB	0.652187	0.222747	-0.201127	0.869871	Color2 [DarkGray]	1	4		0.283567	0.105281	-0.11199	-0.00361392	-0.48355	-0.0858362	0.0727208	-0.0345985
STK24	0.0598703	0.871224	0.0379631	1.02666	Color2 [DarkGray]	1	4		-0.531606	-0.0136227	-0.00784184	0.104115	-0.530919	0.175602	0.21442	-0.156206
TPT1	0.188186	0.648357	0.1525	1.11149	Color2 [DarkGray]	1	4		-0.778512	0.0860213	-0.224342	-0.0762249	-0.8537	0.270723	0.143459	0.0564609
GIGYF2	0.00800126	0.981745	-0.00273	0.99811	Color2 [DarkGray]	1	4		0.168271	-0.218591	0.101314	-0.00765225	-0.190239	-0.00300138	0.042586	0.183075
GSTM3	0.658258	0.219656	0.635522	1.5535	Color2 [DarkGray]	1	4		-0.374055	-1.52766	-0.0198735	-0.0157967	-0.681838	0.167324	0.466178	0.653043
HMGCS1	0.534033	0.292393	0.302066	1.23291	Color2 [DarkGray]	1	4		-0.15629	-0.439016	0.390895	-0.439763	-0.36831	0.415651	0.247816	0.268933
PCMT1	1.26611	0.0541866	-0.285724	0.82033	Color2 [DarkGray]	1	4		0.402486	-0.0171598	0.057632	0.247207	-0.293648	0.0207675	-0.0105962	-0.169256
ACOT9	0.0897113	0.813371	0.0795314	1.05667	Color2 [DarkGray]	1	4		0.179468	0.122498	-0.199698	-0.161899	0.899143	0.14448	-0.476199	-0.308929
EIF4G3	0.109221	0.777641	0.0209967	1.01466	Color2 [DarkGray]	1	4		0.122595	-0.138861	-0.0485601	0.119567	0.0716072	-0.053242	0.0576297	0.0627334
DHRS7	0.098228	0.797576	0.0432457	1.03043	Color2 [DarkGray]	1	4		-0.43743	-0.016174	0.0523214	0.0152396	0.228837	-0.0623094	-0.327427	-0.0521616
EDC4	0.440998	0.362244	0.0515951	1.03641	Color2 [DarkGray]	1	4		-0.0590439	-0.059255	0.0359509	0.0764953	0.117891	-0.0468828	0.0183943	0.111125
RBM25	0.956303	0.110585	-0.295475	0.814804	Color2 [DarkGray]	1	4		-0.0334794	0.0232892	0.035155	0.10493	-0.664885	-0.0202184	-0.351682	-0.015222
PSMB5	0.0210865	0.952606	-0.0281967	0.980645	Color2 [DarkGray]	1	4		0.437725	-1.27635	-0.0449839	0.0775849	-0.964831	0.0391848	0.224073	-0.217236
GOT1	0.637835	0.230232	-0.168616	0.889696	Color2 [DarkGray]	1	4		0.0899759	-0.141476	0.221393	0.0639789	-0.40726	-0.0600152	0.0489686	-0.0222838
SEC24A	0.234454	0.582836	0.128608	1.09324	Color2 [DarkGray]	1	4		-0.669538	0.296277	-0.0177594	-0.0179	-0.1962	0.0755608	-0.00424052	0.230392
KLC3	0.245548	0.568136	-0.102644	0.931324	Color2 [DarkGray]	1	4		0.258977	-0.118972	0.22466	-0.0603585	-0.196225	-0.253312	0.366476	-0.0232093
SEC22B	0.352167	0.44446	-0.0977157	0.934511	Color2 [DarkGray]	1	4		0.065417	-0.0519085	-0.0624349	0.0907824	-0.30949	0.15543	-0.245703	0.0507562
UBA52	0.584243	0.26047	-0.591261	0.663762	Color2 [DarkGray]	1	4		0.0563213	-0.223403	-0.0511751	0.462102	-1.82776	0.170634	-0.467751	0.00367952
BZW2	0.106708	0.782154	0.0314088	1.02201	Color2 [DarkGray]	1	4		0.00508035	0.0096501	-0.0576181	0.157931	-0.114905	0.0455404	-0.0288284	0.338872
RAD23A	0.772469	0.168862	0.392469	1.31264	Color2 [DarkGray]	1	4		-0.351913	-0.100789	0.236102	-0.370343	-0.0204369	0.0680902	0.86389	0.0713879
ALDH3A2	0.0476675	0.896051	-0.026856	0.981557	Color2 [DarkGray]	1	4		0.0107888	-0.0094882	0.489674	-0.0172895	-0.08316	0.0901601	0.522937	-0.163676
FXR1	0.301407	0.499566	-0.203826	0.868245	Color2 [DarkGray]	1	4		0.0364988	-0.204039	0.0946109	0.697444	-0.12087	0.510648	-0.503087	-0.0774805
CD2AP	0.18954	0.646338	-0.079532	0.946365	Color2 [DarkGray]	1	4		-0.101856	0.0732466	0.0419946	-0.0800071	-0.518272	0.132585	0.164242	-0.163305
RAP2B	0.227987	0.591579	0.125946	1.09122	Color2 [DarkGray]	1	4		-0.0639619	0.517374	-0.332924	-0.0392063	0.543124	0.0284287	-0.00488543	0.0183987
UBTF	0.456043	0.349911	-0.159542	0.895309	Color2 [DarkGray]	1	4		0.13505	-0.31902	0.147795	0.0431508	-0.383525	-0.0566273	-0.301284	0.110246
PDHB	0.427366	0.373795	0.238037	1.17939	Color2 [DarkGray]	1	4		-0.846717	0.00188318	0.255017	-0.160663	0.0536989	-0.151386	0.0816047	0.21775
RUFY1	0.20122	0.629188	0.0859573	1.06139	Color2 [DarkGray]	1	4		-0.0854683	0.142251	-0.0600466	-0.205149	-0.326558	0.0534969	0.418769	-0.0102921
GLRX3	0.232812	0.585043	-0.0687463	0.953466	Color2 [DarkGray]	1	4		-0.0943321	0.20095	-0.00160145	0.0864458	-0.239002	0.24795	-0.016792	-0.0756796
KLK10	0.517724	0.303582	0.51159	1.42562	Color2 [DarkGray]	1	4		-0.488795	0.862893	-0.787572	-0.137451	-0.00208456	0.162328	0.130823	1.20437
TWF1	0.142515	0.720253	0.121619	1.08796	Color2 [DarkGray]	1	4		0.250586	0.112596	-0.154952	-0.347741	-0.611035	0.535735	0.61381	-0.191545
PSPC1	0.129138	0.742783	-0.0495841	0.966215	Color2 [DarkGray]	1	4		-0.263541	0.0376525	0.0212248	0.138612	-0.363958	-0.0273608	-0.0716004	0.198531
EHHADH	0.205738	0.622676	0.103963	1.07472	Color2 [DarkGray]	1	4		-0.508476	0.204227	-0.142195	0.016607	0.00204755	0.146962	0.212662	-0.375657
ATG7	0.882469	0.131078	0.368798	1.29128	Color2 [DarkGray]	1	4		-0.238746	0.227823	-0.0764596	-0.213674	0.781095	0.0687657	-0.0298766	0.354152
CNN2	0.0642053	0.862571	-0.035257	0.975858	Color2 [DarkGray]	1	4		-0.0263089	0.292665	-0.00168753	0.0733553	-0.263944	-0.0351987	0.57173	-0.075592
RAB10	0.0894863	0.813793	-0.0415228	0.971629	Color2 [DarkGray]	1	4		0.127472	0.0333593	0.0734213	-0.122379	-0.20153	-0.210569	0.460628	-0.102747
AEBP1	0.0473109	0.896787	0.0426069	1.02997	Color2 [DarkGray]	1	4		-0.342274	-0.0748084	0.0502723	0.649441	-0.0879274	0.28734	-0.416992	0.670637
PTPA	0.445117	0.358825	-0.178725	0.883483	Color2 [DarkGray]	1	4		-0.116773	0.219294	0.0335771	0.260173	-0.216104	-0.0404757	0.337873	-0.399923
TOR1AIP1	1.01108	0.0974803	-0.3026	0.81079	Color2 [DarkGray]	1	4		0.566881	-0.00220823	-0.0192305	0.407814	-0.161908	0.0575436	-0.0803455	-0.0724331
RBM4	0.352666	0.44395	-0.149257	0.901715	Color2 [DarkGray]	1	4		0.381854	-0.131554	-0.112453	0.0840277	-0.439034	0.101109	-0.190789	0.153561
SYMPK	0.105815	0.783764	-0.0241371	0.983409	Color2 [DarkGray]	1	4		-0.0987702	-0.00513973	0.0254024	-0.0216316	-0.140967	0.158639	-0.202429	-0.0119304
STK4	0.0576567	0.875676	-0.0440337	0.969939	Color2 [DarkGray]	1	4		0.101489	0.177853	-0.168872	-0.105544	0.552017	-0.457793	-0.485704	0.220271
CYCS	0.350208	0.44647	0.2997	1.23089	Color2 [DarkGray]	1	4		-0.424258	-0.231964	0.475736	-0.163783	-0.594506	0.829333	0.551371	0.0683337
EFL1	0.107563	0.780616	0.058245	1.0412	Color2 [DarkGray]	1	4		-0.402277	0.301436	-0.0534354	-0.0855018	0.270215	0.124608	-0.376915	-0.0247065
MAP2K1	0.137113	0.729268	-0.071798	0.951452	Color2 [DarkGray]	1	4		-0.281905	0.511144	-0.0848576	0.207336	0.213085	0.065541	0.0319981	-0.246098
ACTR1A	1.48445	0.0327753	-0.299485	0.812542	Color2 [DarkGray]	1	4		0.22765	0.236313	-0.0118907	0.17667	-0.217148	0.00668836	0.00819966	-0.366939
NCF4	0.0657962	0.859417	-0.0985181	0.933992	Color2 [DarkGray]	1	4		0.452641	-0.107228	0.0077548	-0.0437793	1.28769	-0.738167	-0.953827	0.31962
TIMM44	0.299171	0.502145	0.0935879	1.06702	Color2 [DarkGray]	1	4		-0.362923	0.0189639	-0.0120206	0.11805	0.00232814	0.00681897	-0.124473	0.251748
RPS12	0.000665536	0.998469	-0.000366452	0.999746	Color2 [DarkGray]	1	4		-0.224039	-0.0930846	0.157316	-0.0284082	-0.527013	0.220112	0.0976716	0.0195487
TOM1L2	0.0595729	0.871821	0.0513144	1.03621	Color2 [DarkGray]	1	4		-0.202842	-0.47021	0.204111	0.11136	-0.669916	0.125774	0.579744	-0.187925
FEN1	0.326781	0.471215	-0.210617	0.864168	Color2 [DarkGray]	1	4		-0.178045	0.575973	-0.0753808	0.156253	-0.221012	0.0677721	-0.616103	0.405677
AHSA1	0.0990958	0.795984	-0.0815425	0.945047	Color2 [DarkGray]	1	4		0.0014374	0.0132041	-0.243229	0.570357	-0.535411	0.504169	-0.288611	0.335452
CSTF3	0.0542273	0.882618	-0.0197359	0.986413	Color2 [DarkGray]	1	4		0.1512	-0.0387844	-0.138549	0.0112972	-0.20862	0.245172	-0.212451	0.0821198
EPS15L1	0.46213	0.34504	-0.193735	0.874339	Color2 [DarkGray]	1	4		0.285883	-0.118746	0.287407	-0.0570251	-0.484974	0.179886	0.12543	-0.197765
CALML5	0.963955	0.108654	1.00786	2.01092	Color2 [DarkGray]	1	4		-0.905584	-0.871433	-0.133182	0.193318	0.14923	-0.320588	1.81885	0.667052
PSMD7	0.504219	0.31317	0.100318	1.07201	Color2 [DarkGray]	1	4		0.0042263	0.0104847	-0.100198	-0.0851275	0.252135	0.127252	-0.151815	0.00308602
TPM1	0.0526372	0.885855	0.0319214	1.02237	Color2 [DarkGray]	1	4		-0.301397	0.298707	-0.350759	0.0940804	-0.359005	0.15651	0.25728	-0.186468
BPI	0.598623	0.251986	-0.747057	0.595818	Color2 [DarkGray]	1	4		0.865039	0.235593	-0.689269	0.412733	-0.250611	-0.89844	-1.66419	0.649105
PSMA6	0.263761	0.544802	-0.116909	0.922161	Color2 [DarkGray]	1	4		-0.063457	0.571917	-0.00622473	0.157732	-0.153523	0.358333	0.0585054	-0.0709836
PRKCD	0.0294615	0.934412	-0.0212742	0.985362	Color2 [DarkGray]	1	4		0.209026	0.141781	-0.0617353	-0.102829	0.630845	-0.52189	0.00906624	-0.016874
FBLN2	0.195188	0.637987	0.166274	1.12216	Color2 [DarkGray]	1	4		-0.483926	-0.893897	0.426583	0.337249	0.164572	-0.104258	0.195641	-0.20485
ERP29	0.475955	0.33423	-0.115941	0.92278	Color2 [DarkGray]	1	4		-0.017692	-0.0286759	0.111826	0.0506513	-0.301363	0.185638	-0.191993	-0.039935
ACAP2	0.414317	0.385197	-0.0735947	0.950267	Color2 [DarkGray]	1	4		0.254365	-0.0832456	-0.00724107	0.140383	0.033947	-0.00778461	0.0395575	-0.0558369
KYNU	0.163178	0.686786	0.204908	1.15261	Color2 [DarkGray]	1	4		-0.870458	0.792601	-0.601185	0.360267	-0.432021	0.912899	-0.0204365	0.0404162
IDH3A	0.587903	0.258283	0.157769	1.11556	Color2 [DarkGray]	1	4		-0.15786	-0.0540951	0.00738116	0.0274918	0.271812	0.319615	0.0669112	-0.204344
SERPINA4	0.35726	0.439278	0.632246	1.54998	Color2 [DarkGray]	1	4		-0.174601	0.766853	-0.100975	0.0605005	2.83601	-0.467812	-0.0277742	0.740338
ETFB	0.809109	0.1552	-0.179598	0.882949	Color2 [DarkGray]	1	4		-0.114397	0.255311	0.201091	0.0634831	-0.0490413	-0.19994	-0.18184	0.117917
STAU1	0.610088	0.245421	-0.153552	0.899034	Color2 [DarkGray]	1	4		0.185605	-0.0636293	-0.117263	0.182015	-0.312745	0.0803828	-0.188287	-0.0068326
TOR1AIP1	0.0181168	0.959143	0.0122121	1.0085	Color2 [DarkGray]	1	4		-0.206079	0.280394	0.0439878	-0.148872	0.444724	0.183044	-0.485819	-0.123669
SET	0.768945	0.170237	-0.336752	0.791822	Color2 [DarkGray]	1	4		0.170756	0.223607	-0.305112	0.119329	-0.786205	-0.0324141	-0.29898	-0.020831
CDC37	0.612807	0.243889	-0.313543	0.804663	Color2 [DarkGray]	1	4		0.0928734	0.0644989	-0.0187993	-0.0168649	-0.936525	0.143998	0.00615843	-0.346096
EPS8L1	0.0859755	0.820398	-0.112525	0.924968	Color2 [DarkGray]	1	4		0.0363866	1.0967	-0.101487	-0.0358682	-0.470079	-0.328625	1.20824	0.136088
ARFGEF2	0.302049	0.498828	0.152516	1.11151	Color2 [DarkGray]	1	4		-0.221441	0.0780602	0.0874488	-0.110068	0.456057	-0.147171	-0.307616	0.442795
LMAN2	0.114218	0.768745	-0.0460809	0.968564	Color2 [DarkGray]	1	4		0.0731495	-0.0601838	0.45118	-0.0744114	0.223406	-0.154578	-0.0226188	0.159202
HIST1H1C	1.24311	0.0571333	-0.613232	0.653731	Color2 [DarkGray]	1	4		0.584246	-0.192666	0.438991	0.154928	-0.742434	-0.0766259	-0.668054	0.0196862
SF3A3	0.72015	0.19048	-0.31372	0.804564	Color2 [DarkGray]	1	4		0.259325	0.098749	-0.320372	0.605991	-0.354044	0.0839939	-0.201103	-0.140035
PSMB8	0.235827	0.580996	-0.176232	0.885011	Color2 [DarkGray]	1	4		-0.156151	0.986394	-0.000318461	0.220704	-0.060971	0.580122	-0.0964619	-0.0769881
CD163	0.641023	0.228548	-0.582907	0.667617	Color2 [DarkGray]	1	4		-0.372452	0.243124	0.911759	-0.0386756	-0.749109	0.0279112	0.297723	-1.1644
PRDX2	0.227772	0.591872	0.23398	1.17607	Color2 [DarkGray]	1	4		-0.064945	0.075	-0.130621	0.0670532	0.859054	-0.703147	0.962372	-0.235872
SGPL1	1.19554	0.063747	-0.529917	0.692595	Color2 [DarkGray]	1	4		-0.0219356	0.704773	0.0933391	0.240541	-0.383408	0.0518248	-0.0646867	-0.70668
MEAK7	0.259652	0.549981	-0.11165	0.925529	Color2 [DarkGray]	1	4		-0.0885686	0.476245	-0.135076	0.209811	-0.252159	0.240271	0.0772263	-0.0495262
TRIP6	0.0830475	0.825948	-0.0552668	0.962416	Color2 [DarkGray]	1	4		0.453983	-0.0104838	-0.0738158	-0.016299	-0.0361565	-0.397154	0.598478	-0.0328505
BSG	0.200923	0.629618	0.151908	1.11104	Color2 [DarkGray]	1	4		0.545938	-0.280308	-0.259963	8.11735e-05	0.0192554	0.561314	0.467596	-0.434784
UBQLN1	0.603011	0.249453	0.188605	1.13966	Color2 [DarkGray]	1	4		-0.133398	-0.0387807	-0.0241847	0.181917	0.049106	0.379941	0.43064	-0.119712
USP24	0.388374	0.408908	0.22638	1.1699	Color2 [DarkGray]	1	4		-0.494561	0.214954	0.0106008	-0.0467238	0.720616	-0.239034	-0.0382249	0.146433
MYL9	0.124521	0.750722	0.0822917	1.0587	Color2 [DarkGray]	1	4		0.221222	-0.742249	0.0486736	0.156113	0.317272	-0.0977913	-0.0777728	-0.128781
COPE	0.176547	0.665967	-0.0612977	0.958402	Color2 [DarkGray]	1	4		-0.223176	0.291755	0.161565	0.00782955	-0.136009	0.212787	0.00689685	-0.0908929
UBTF	0.602082	0.249987	-0.137457	0.90912	Color2 [DarkGray]	1	4		0.0581847	-0.0185275	-0.00300319	-0.0170165	-0.443029	0.0410065	-0.0626819	-0.0654879
MTREX	0.261561	0.547569	0.0755286	1.05375	Color2 [DarkGray]	1	4		-0.0261072	0.00459956	-0.0803568	-0.0239491	-0.294486	0.243306	0.0932475	0.134233
RPS14	0.721771	0.189771	0.233709	1.17585	Color2 [DarkGray]	1	4		-0.0499576	0.160922	-0.156402	-0.204778	-0.132063	0.0777545	0.513361	0.225567
TCAF2	0.3344	0.46302	-0.0646897	0.956151	Color2 [DarkGray]	1	4		0.115005	0.0659213	-0.150898	0.163749	0.0454114	-0.115169	0.0720709	-0.0672944
S100A16	0.166129	0.682137	-0.222715	0.856951	Color2 [DarkGray]	1	4		-0.103874	0.185409	0.883996	-0.377347	-0.949714	0.125034	1.0685	-0.546498
PTPRF	1.1037	0.0787591	0.219347	1.16421	Color2 [DarkGray]	1	4		-0.0716145	-0.146497	0.0886309	-0.0455486	0.430422	0.00759382	0.0921689	0.172173
CLCA2	1.22902	0.0590177	0.650396	1.5696	Color2 [DarkGray]	1	4		-0.15753	0.0839542	-0.372861	-0.116746	-0.2253	0.810231	0.959994	0.493474
SART3	0.00471489	0.989202	-0.00171647	0.998811	Color2 [DarkGray]	1	4		-0.330048	-0.0194298	0.0170412	0.0676901	-0.149574	-0.255995	0.102845	0.0311127
PPP2R5C	0.214346	0.610456	0.086542	1.06182	Color2 [DarkGray]	1	4		-0.126966	-0.0190648	0.0687593	-0.00781832	0.136337	-0.0160906	0.444744	-0.303913
NUDT21	0.359772	0.436745	-0.0998793	0.933111	Color2 [DarkGray]	1	4		0.150663	-0.113228	-0.0612206	0.0709899	-0.395744	0.0546002	0.00305101	-0.0142209
RAD23A	0	1	NaN	#VALUE!	Color2 [DarkGray]	1	4		NaN	NaN	NaN	NaN	NaN	NaN	NaN	NaN
TMED2	0.0365426	0.9193	0.011058	1.00769	Color2 [DarkGray]	1	4		0.143459	-0.0672621	-0.072217	0.0548211	0.235604	-0.159964	0.114116	-0.0867238
KPNA3	0.778524	0.166524	0.295349	1.22718	Color2 [DarkGray]	1	4		-0.38948	0.0932641	-0.343676	0.0417233	0.114901	-0.0550667	-0.0242107	0.547603
FAM114A2	0.040828	0.910274	-0.0353055	0.975825	Color2 [DarkGray]	1	4		-0.295899	-0.153425	0.184999	0.113025	-0.795674	0.300262	0.423923	-0.221034
S100A11	0.285253	0.518498	-0.125524	0.916671	Color2 [DarkGray]	1	4		-0.0982823	0.134591	0.293542	-0.0939613	-0.0867577	0.079863	0.233283	-0.492597
DDOST	0.569044	0.269746	0.247155	1.18686	Color2 [DarkGray]	1	4		-0.127737	0.0227007	0.199928	-0.105425	0.764321	-0.10713	0.0602398	0.260657
RPL23	0.130952	0.739687	-0.068084	0.953904	Color2 [DarkGray]	1	4		-0.188613	-0.0793137	0.0739314	0.00546333	-0.675971	0.101739	0.0633674	0.0499969
EPX	0.519088	0.30263	1.08693	2.12421	Color2 [DarkGray]	1	4		0.441886	-0.496439	0.0845062	-0.159518	3.81321	-0.0971001	-0.226454	0.728491
IRF6	0.200639	0.63003	0.107024	1.077	Color2 [DarkGray]	1	4		-0.215313	0.27661	0.0586919	-0.273922	-0.294607	0.353212	0.355389	-0.139829
RPL9	0.0915036	0.810021	0.080028	1.05704	Color2 [DarkGray]	1	4		-0.615831	-0.0533783	0.194593	-0.109517	-0.842814	0.278521	0.316652	-0.0163796
RBP1	0.231804	0.586403	-0.231849	0.851543	Color2 [DarkGray]	1	4		0.0528257	0.831924	-0.340692	0.734399	-0.0106163	0.909704	-0.453674	-0.0943528
PPP6R3	0.192764	0.641558	-0.0922724	0.938044	Color2 [DarkGray]	1	4		0.461375	0.00206421	-0.182098	0.0697711	-0.12815	-0.287396	0.0814215	0.316147
CRABP2	0.288838	0.514236	-0.258983	0.835677	Color2 [DarkGray]	1	4		-0.28942	0.073347	0.888377	0.459867	-0.241921	-0.0743093	0.822614	-0.410147
HBS1L	0.56478	0.272408	-0.338336	0.790953	Color2 [DarkGray]	1	4		0.20812	-0.2145	0.181753	0.132706	-1.03952	0.0253775	0.0742227	-0.105343
CALML3	0.444516	0.359322	-0.438059	0.738127	Color2 [DarkGray]	1	4		0.0872987	-0.075567	0.705419	0.275441	-0.710986	-0.181822	0.959465	-0.8263
SLC25A3	0.248009	0.564926	0.0916918	1.06562	Color2 [DarkGray]	1	4		-0.218725	0.0363685	0.152068	-0.390469	0.209126	0.0108438	-0.21108	-0.0628802
TBL1XR1	0.561537	0.27445	-0.130719	0.913376	Color2 [DarkGray]	1	4		-0.0196543	-0.0279056	0.00615878	0.240297	-0.285154	0.0535821	-0.169744	0.0773357
ACAD9	0.189595	0.646256	0.0871153	1.06224	Color2 [DarkGray]	1	4		0.110374	-0.168941	0.107827	-0.115574	0.514137	-0.118913	-0.231032	0.117955
SFXN1	0.0628691	0.865229	-0.0272121	0.981315	Color2 [DarkGray]	1	4		0.03537	-0.0744047	-0.0754201	0.216756	0.0258018	0.323466	-0.347855	-0.00795986
DNAJB11	0.0671384	0.856765	-0.0300405	0.979393	Color2 [DarkGray]	1	4		-0.145753	0.00291766	-0.0244038	0.129936	0.0243761	0.0391625	-0.461445	0.240442
TMEM214	0.0182348	0.958882	0.00702975	1.00488	Color2 [DarkGray]	1	4		0.240828	-0.0613904	0.109284	0.00371931	-0.0516974	-0.014671	-0.0311333	0.418062
SBDS	0.486196	0.32644	-0.238212	0.847795	Color2 [DarkGray]	1	4		-0.341132	0.328116	0.0224352	0.149527	-0.707856	0.0443087	-0.0331721	-0.0971826
PKN2	0.0833901	0.825296	-0.0525991	0.964198	Color2 [DarkGray]	1	4		-0.309498	-0.100335	0.357035	0.243116	-0.235446	0.0982651	0.425415	-0.308312
FHL1	0.179425	0.661569	0.210933	1.15744	Color2 [DarkGray]	1	4		0.227331	-0.98569	0.81013	-0.261099	-0.341459	0.743375	-0.19073	0.423216
EPS15	1.54336	0.028618	-0.306839	0.808411	Color2 [DarkGray]	1	4		0.149132	0.141508	-0.0180673	0.176321	-0.472156	-0.0570149	-0.190198	-0.0590909
KPNA1	0.108459	0.779007	-0.0585431	0.960233	Color2 [DarkGray]	1	4		0.0360783	-0.0726727	-0.240547	0.272181	-0.528943	0.190827	0.176034	-0.0770512
EFEMP1	0.109318	0.777467	0.111858	1.08062	Color2 [DarkGray]	1	4		-0.0200152	-1.0675	0.307932	0.0803254	0.0801842	-0.30245	0.493315	-0.522879
SMARCA4	1.72389	0.0188848	-0.339531	0.790298	Color2 [DarkGray]	1	4		0.371929	-0.0272167	0.146715	0.173754	-0.224288	-0.341478	-0.0858242	-0.0413514
SMC2	0.47513	0.334865	-0.20849	0.865442	Color2 [DarkGray]	1	4		0.149857	0.26706	-0.304746	-0.0357014	0.0551772	0.069943	-0.572026	-0.310586
LYPLA2	0.522952	0.29995	-0.273777	0.827151	Color2 [DarkGray]	1	4		0.0422719	0.0092262	-0.0308218	-0.00430072	-0.918674	0.134724	0.0546775	-0.349459
AGT	0.314705	0.484502	0.580604	1.49547	Color2 [DarkGray]	1	4		-0.981303	0.272523	-0.289311	0.209785	2.45507	-0.859694	-0.25609	0.194823
FTSJ3	0.439383	0.363595	-0.220831	0.858071	Color2 [DarkGray]	1	4		-0.0103775	-0.214072	0.0238503	0.0103823	-0.789843	0.154931	-0.456151	0.0175226
ANKHD1-EIF4EBP3	0.979229	0.104899	-0.338358	0.790941	Color2 [DarkGray]	1	4		0.388014	-0.132035	0.183244	0.203723	-0.590385	-0.0991242	-0.0603954	0.0394168
AMBP	0.470623	0.338358	0.499113	1.41334	Color2 [DarkGray]	1	4		0.124741	0.0718275	-0.103947	-0.428105	1.65496	-0.514013	0.00723571	0.512792
UACA	0.460457	0.346372	-0.149556	0.901528	Color2 [DarkGray]	1	4		-0.0488404	0.0808218	0.201578	-0.0499847	-0.446994	-0.130797	0.196246	-0.0331017
SAFB2	0.238196	0.577836	-0.109474	0.926926	Color2 [DarkGray]	1	4		0.142486	-0.438282	-0.0342646	0.113549	-0.438728	0.135913	-0.308456	-0.0431377
SMARCC1	0.0883218	0.815978	-0.0462591	0.968444	Color2 [DarkGray]	1	4		0.139401	-0.107977	-0.0349313	-0.0204991	-0.584655	0.00996082	0.138953	0.226698
ABCF2	0.0586992	0.873576	0.0236359	1.01652	Color2 [DarkGray]	1	4		0.0223748	-0.138285	-0.14848	0.0631251	-0.402876	0.200662	0.0886095	0.00688281
CD14	0.321267	0.477236	-0.216452	0.86068	Color2 [DarkGray]	1	4		-0.432977	0.635681	0.672851	-0.0133108	0.237814	-0.114915	0.0825813	-0.209044
LSS	0.151903	0.704851	0.118059	1.08527	Color2 [DarkGray]	1	4		-0.348607	-0.019593	0.63674	-0.275072	0.0533328	-0.308491	0.6367	0.0841599
OTUB1	2.24756	0.00565505	-0.506372	0.70399	Color2 [DarkGray]	1	4		0.164359	0.0354484	0.117139	0.454893	-0.419143	-0.280716	-0.448831	-0.104959
EXOC1	0.0626183	0.865729	0.0191644	1.01337	Color2 [DarkGray]	1	4		-0.0245054	-0.0616269	0.0291268	0.0734393	-0.0508971	0.126742	0.247694	-0.230448
SNRNP70	0.360224	0.436291	-0.148409	0.902245	Color2 [DarkGray]	1	4		0.258169	-0.10355	0.090174	0.0465217	-0.446773	0.339755	-0.0630192	-0.132283
RPS11	0.087438	0.81764	-0.0493004	0.966405	Color2 [DarkGray]	1	4		0.00863584	0.00616426	0.154524	-0.114032	-0.55975	0.301847	0.231423	-0.115429
AHCYL1	0.891626	0.128344	-0.248429	0.841812	Color2 [DarkGray]	1	4		0.221073	-0.0159315	0.148832	-0.0109034	0.0882033	-0.519608	-0.12201	-0.0972318
NUP50	0.428034	0.373221	-0.111601	0.925561	Color2 [DarkGray]	1	4		0.193665	0.122303	-0.204137	-0.0687336	-0.206544	0.058319	-0.239759	-0.0153229
PSAT1	0.067189	0.856665	-0.0697693	0.95279	Color2 [DarkGray]	1	4		-0.534362	-0.388904	0.0152604	0.423212	-1.08256	-0.0211102	0.197701	0.142098
ORM2	0.075013	0.84137	0.0927437	1.0664	Color2 [DarkGray]	1	4		-1.06492	0.483054	-0.114122	0.0721122	0.562497	-0.386447	-0.730761	0.301813
FUS	0.0716992	0.847814	-0.0739696	0.95002	Color2 [DarkGray]	1	4		0.624765	0.00794689	-0.0295158	-0.16637	-0.728678	0.105373	0.848546	-0.0842925
SUCLG1	0.425429	0.375467	0.202466	1.15066	Color2 [DarkGray]	1	4		-0.33696	-0.062427	0.0429129	0.0335524	0.426435	-0.342169	-0.045559	0.448237
ARPC5	0.678109	0.209842	-0.147562	0.902775	Color2 [DarkGray]	1	4		-0.210159	0.199916	0.0282707	0.108827	-0.220046	0.0337827	-0.19091	-0.0862186
HNRNPA0	0.233582	0.584007	0.187962	1.13915	Color2 [DarkGray]	1	4		-0.909147	0.00929831	0.258899	-0.0792884	-0.584827	0.236106	0.0740658	0.306267
HCLS1	1.66369	0.0216927	-0.86009	0.550918	Color2 [DarkGray]	1	4		0.70459	0.0791434	0.0412133	0.229454	-0.767687	-0.327397	-1.17022	-0.120658
38961	1.25328	0.0558108	-0.258043	0.836222	Color2 [DarkGray]	1	4		0.110724	-0.0264277	0.00472264	0.0024133	-0.152292	-0.22532	-0.527071	-0.0360565
GBA	0.204727	0.624127	-0.117017	0.922092	Color2 [DarkGray]	1	4		-0.229659	0.128251	0.121096	0.131219	-0.108235	-0.337833	-0.389463	0.518369
SIRPA	0.0074131	0.983076	0.00486987	1.00338	Color2 [DarkGray]	1	4		0.31059	-0.0321836	-0.230646	-0.0428339	0.405242	0.0319552	-0.505749	0.0929584
GALNT2	0.00416121	0.990464	-0.00341756	0.997634	Color2 [DarkGray]	1	4		0.336718	-0.233557	-0.197408	0.141291	0.434457	0.364626	-0.206515	-0.559194
FMNL1	0	1	NaN	#VALUE!	Color2 [DarkGray]	1	4		NaN	NaN	NaN	NaN	NaN	NaN	NaN	NaN
FMNL1	0.726669	0.187642	-0.47641	0.718764	Color2 [DarkGray]	1	4		0.680695	0.0546575	-0.0346849	-0.0540232	0.260099	-0.510977	-0.965388	-0.0427284
DNAJA2	0.294476	0.507603	0.12363	1.08947	Color2 [DarkGray]	1	4		-0.513542	0.0380462	-0.0608782	0.0766103	-0.308871	0.15279	0.0208557	0.169982
ANP32B	0.644816	0.226561	-0.274728	0.826606	Color2 [DarkGray]	1	4		-0.320812	0.195292	0.226853	0.390059	-0.317195	0.222795	-0.144564	-0.368555
TPD52	0.0781769	0.835263	0.113901	1.08215	Color2 [DarkGray]	1	4		-0.736414	-1.293	0.226003	0.390724	-1.23703	0.174688	-0.0961838	0.201447
EXOC1	0.215096	0.609403	0.154728	1.11321	Color2 [DarkGray]	1	4		0.197725	-0.638036	-0.227986	-0.113369	-0.724682	0.13201	0.177057	0.252862
CBX1	0.0670647	0.85691	-0.0308508	0.978843	Color2 [DarkGray]	1	4		-0.0131466	-0.0936679	0.422233	0.212906	-0.0529055	0.430025	0.0929823	-0.0651804
MAP7D1	0.521259	0.301121	-0.41095	0.752128	Color2 [DarkGray]	1	4		0.437671	0.331087	-0.196763	0.0421129	-1.13708	0.431528	0.0243526	-0.34849
CLCA4	0.280644	0.52403	0.47703	1.39188	Color2 [DarkGray]	1	4		0.0438852	-0.47224	0.945875	-0.461399	0.272171	-0.515376	2.29251	-0.0850657
HOOK1	0.116376	0.764933	-0.0636977	0.956809	Color2 [DarkGray]	1	4		0.300273	0.0626704	-0.282302	0.0191845	-0.195733	-0.297262	0.440834	-0.102803
NAPRT	0.212828	0.612593	0.183967	1.136	Color2 [DarkGray]	1	4		-0.471483	0.756353	-0.200758	-0.28872	0.261517	-0.413732	0.581048	0.102426
TMEM43	0.137017	0.729429	0.0466383	1.03286	Color2 [DarkGray]	1	4		-0.152266	0.0387769	0.101799	-0.0568066	0.323558	0.0453771	-0.00961692	-0.241262
NFKB1	1.23273	0.0585149	-0.141471	0.906594	Color2 [DarkGray]	1	4		0.0329566	0.0654393	0.0798485	0.0200574	-0.127608	-0.121847	0.0779315	-0.19606
PSMA7	0.22671	0.593322	-0.0951103	0.936201	Color2 [DarkGray]	1	4		-0.0237807	0.169677	0.00284059	0.0867514	-0.456538	0.322603	0.0692028	-0.0802206
WASHC4	0.390172	0.407219	-0.110763	0.926098	Color2 [DarkGray]	1	4		0.19126	0.215121	-0.127139	-0.0240016	0.178781	-0.0355268	-0.272565	-0.0585027
SIN3A	0.597375	0.252711	0.162767	1.11943	Color2 [DarkGray]	1	4		-0.289245	0.0138869	0.085546	-0.0409432	0.387457	-0.0803046	0.0679409	0.0452184
STXBP3	1.87524	0.0133277	0.350879	1.27534	Color2 [DarkGray]	1	4		-0.219392	-0.0214435	-0.297667	-0.217954	0.319878	0.111918	0.262244	-0.0469828
ATP5PO	0.135458	0.732052	0.0494382	1.03486	Color2 [DarkGray]	1	4		0.158024	-0.141965	0.183759	-0.331039	0.07547	-0.0681927	0.157476	-0.0982207
UQCRFS1	0.227811	0.591819	-0.044837	0.969399	Color2 [DarkGray]	1	4		-0.0244151	-0.122949	0.0576203	0.0490784	0.0843311	-0.118737	-0.210918	0.0253108
PSMB1	0.117807	0.762418	-0.0696617	0.952861	Color2 [DarkGray]	1	4		-0.362134	0.366281	-0.0195517	0.0380569	-0.435468	0.296549	0.0941882	-0.211264
SLFN5	0.213052	0.612277	-0.268958	0.829919	Color2 [DarkGray]	1	4		0.465964	1.10814	-0.996777	-0.0643153	0.0826579	0.415139	-0.539768	-0.520851
ATP5F1C	0.22724	0.592598	-0.0925087	0.93789	Color2 [DarkGray]	1	4		-0.0708007	0.353083	0.07131	-0.167924	0.178235	-0.279346	-0.21863	0.135375
RELCH	0.0449041	0.90177	-0.0403123	0.972444	Color2 [DarkGray]	1	4		-0.770402	0.255122	0.211138	-0.136615	-0.742013	0.0241103	0.192182	-0.0762863
RAN	0.567287	0.27084	-0.120337	0.919973	Color2 [DarkGray]	1	4		0.253815	0.223026	-0.0395206	0.00346112	0.165512	-0.0152012	-0.0426396	-0.148236
AFAP1L2	0.712981	0.193651	-0.535313	0.690009	Color2 [DarkGray]	1	4		0.701641	0.269579	-0.417963	0.674042	-0.507409	0.498724	-0.251562	-0.653706
DHX29	0.0763442	0.838795	0.0456651	1.03216	Color2 [DarkGray]	1	4		0.0752647	-0.119261	0.108657	-0.0766912	-0.396178	0.235954	0.523776	-0.192922
PTGS1	0.919788	0.120285	0.405718	1.32475	Color2 [DarkGray]	1	4		-0.139111	-0.274386	0.0919104	-0.136152	0.789721	-0.208142	0.425695	0.157858
PECAM1	0.180083	0.660566	-0.168861	0.889545	Color2 [DarkGray]	1	4		0.116944	-0.761439	0.732399	0.070021	-0.0564486	-0.341068	-0.516572	0.39657
HLA-E	0.346693	0.450098	0.0896361	1.0641	Color2 [DarkGray]	1	4		-0.114457	0.22619	-0.0516474	-0.0528903	0.236943	0.224132	-0.0650176	-0.0303169
RAB11B	0.26709	0.540642	0.111463	1.08032	Color2 [DarkGray]	1	4		-0.369544	0.295586	0.0226079	-0.107925	0.00135459	-0.118377	0.359548	0.0440495
CPSF6	0.236818	0.579671	-0.117511	0.921776	Color2 [DarkGray]	1	4		0.000660262	-0.207437	0.120845	0.0287593	-0.656114	0.24145	-0.0707886	-0.0417654
MMS19	0.110422	0.775493	-0.0559272	0.961976	Color2 [DarkGray]	1	4		-0.481321	0.353725	0.09243	0.0625966	0.0801603	-0.145363	0.0486365	-0.179712
SYK	0.236412	0.580213	-0.146984	0.903137	Color2 [DarkGray]	1	4		0.372183	-0.103798	0.0761934	-0.142324	0.470571	-0.447771	-0.454906	0.0464258
DLST	0.301717	0.49921	-0.0868726	0.941562	Color2 [DarkGray]	1	4		0.0575	0.11917	-0.0524143	-0.0971334	0.0854791	-0.0738463	-0.39348	0.0614793
ATP5F1C	0.150833	0.706588	0.0664782	1.04716	Color2 [DarkGray]	1	4		-0.0132176	0.0273244	0.19205	-0.0861752	-0.175352	-0.108036	0.520805	0.148477
ABLIM1	0.159742	0.692242	0.133543	1.09698	Color2 [DarkGray]	1	4		-0.0699853	-0.328005	0.509269	0.124169	-0.0585131	0.0957056	0.971862	-0.239433
NT5C3A	0.190706	0.644606	0.207194	1.15444	Color2 [DarkGray]	1	4		-0.588295	0.877479	-0.796986	-0.0292058	0.0487877	0.526385	-0.464241	0.180835
DHX36	0.224585	0.596231	-0.0858481	0.942231	Color2 [DarkGray]	1	4		-0.213115	-0.00568878	-0.0157388	0.159559	-0.392302	0.235597	-0.211864	-0.0498074
RPS19	0.223887	0.597191	-0.159822	0.895135	Color2 [DarkGray]	1	4		0.0795484	-0.289988	0.0722826	-0.0051261	-0.994447	0.219033	0.0703771	-0.0775355
PMPCB	0.350249	0.446427	-0.0921913	0.938097	Color2 [DarkGray]	1	4		-0.0167969	-0.0946875	0.0524782	0.0410602	0.0771355	-0.412082	-0.0397155	-0.0120498
EIF5A2	0.402108	0.396179	-0.23812	0.847849	Color2 [DarkGray]	1	4		-0.268033	0.355514	-0.05089	0.403116	-0.252318	0.370372	-0.603702	-0.0271263
OLFM4	0.136134	0.730914	0.391891	1.31211	Color2 [DarkGray]	1	4		2.24182	-0.0826333	-0.307836	-0.432822	2.73869	0.0824832	-1.34713	1.51206
STAT6	0.733862	0.18456	-0.230922	0.85209	Color2 [DarkGray]	1	4		-0.0185467	0.106737	-0.00708249	0.0357108	-0.359123	0.00379479	0.0959454	-0.547488
SAMM50	0.0954988	0.802604	0.0560411	1.03961	Color2 [DarkGray]	1	4		-0.0863958	0.08849	-0.0462293	-0.0190699	0.603971	0.00853035	-0.419263	-0.0322787
PEPD	0.552705	0.280089	0.123436	1.08933	Color2 [DarkGray]	1	4		0.0839081	-0.201244	0.0212538	-0.119845	0.00278103	-0.129072	0.206841	0.197268
AKR1B1	0.943921	0.113784	-0.405083	0.755193	Color2 [DarkGray]	1	4		-0.212224	0.2594	0.245155	0.0303061	-0.580651	0.0970892	-0.699478	-0.114657
NUCB2	0.187378	0.649565	0.10099	1.07251	Color2 [DarkGray]	1	4		0.204418	-0.467822	0.356593	-0.401856	0.0261529	-0.0317703	0.103652	-0.00274005
TBL2	0.481774	0.329781	0.133224	1.09674	Color2 [DarkGray]	1	4		-0.27999	0.0347325	0.0232237	-0.226276	0.000704957	0.192	-0.237641	0.129524
PUM1	0.0607106	0.86954	0.0153839	1.01072	Color2 [DarkGray]	1	4		0.218433	-0.133703	0.00175178	-0.0268299	-0.0382472	0.016264	-0.0355044	0.178675
PPP3CA	0.382443	0.414531	-0.131877	0.912643	Color2 [DarkGray]	1	4		0.0808263	-0.0277764	-0.0991698	0.208872	-0.483075	-0.0470246	0.110995	0.0543496
LGALS1	1.36021	0.0436306	-0.791705	0.577661	Color2 [DarkGray]	1	4		-0.0859613	1.0096	0.23384	0.114465	-0.5698	0.109692	-0.733709	-0.701056
PRMT5	0.997628	0.100548	0.223769	1.16778	Color2 [DarkGray]	1	4		0.127268	-0.232747	-0.159319	-0.2122	0.237276	-0.0786594	0.237969	0.0214936
CES2	0.487097	0.325764	-0.48678	0.713616	Color2 [DarkGray]	1	4		-0.104351	0.349242	1.149	-0.463645	-0.674686	0.293368	0.205283	-0.840839
ATL2	0.218227	0.605024	-0.0813182	0.945194	Color2 [DarkGray]	1	4		0.00890729	0.390318	-0.00298716	0.0351995	-0.128175	-0.0405112	0.368094	-0.0932425
HEXB	0.659525	0.219016	-0.321597	0.800183	Color2 [DarkGray]	1	4		-0.332713	0.10577	0.512336	0.130637	-0.46511	0.21738	-0.439152	-0.183477
NECTIN4	0.0360878	0.920264	0.0335336	1.02352	Color2 [DarkGray]	1	4		0.344458	-0.231543	0.0994557	-0.0477634	-0.538093	0.00545237	0.888884	-0.0575023
PTGR1	0.0391829	0.913728	-0.0529184	0.963984	Color2 [DarkGray]	1	4		-0.884301	-0.410185	0.811963	0.667764	-0.491518	0.14165	0.53036	-0.206925
CUL5	1.29489	0.0507116	-0.176109	0.885087	Color2 [DarkGray]	1	4		0.108248	0.00957767	0.0552334	-0.00963588	-0.22626	-0.265541	0.0237297	-0.0729423
ELP1	0.0771988	0.837146	0.0557689	1.03941	Color2 [DarkGray]	1	4		-0.710637	0.508014	-0.0358152	0.109164	0.187451	0.00455276	-0.0415931	-0.0566089
ERLIN1	0.0829775	0.826081	-0.0663649	0.955041	Color2 [DarkGray]	1	4		0.326284	0.0564546	-0.0231353	-0.348295	0.581865	-0.423359	0.0977412	-0.510398
PRXL2A	0.559191	0.275936	-0.500137	0.707039	Color2 [DarkGray]	1	4		0.352643	0.499443	-0.0461507	-0.465863	-0.3916	0.0412644	0.120149	-1.43029
MAP4K4	0.0648907	0.861211	0.0372147	1.02613	Color2 [DarkGray]	1	4		-0.618347	0.155502	-0.0219592	0.15603	-0.214029	0.0167325	0.176869	-0.159487
PPA2	0.239218	0.576477	0.117468	1.08483	Color2 [DarkGray]	1	4		-0.373176	-0.26307	0.172123	0.231183	-0.104351	0.141283	-0.183083	0.38308
ANP32A	0.802123	0.157716	-0.1959	0.873028	Color2 [DarkGray]	1	4		0.00335046	0.0465447	-0.0304089	0.0467693	-0.386516	0.0250545	-0.387643	0.0317623
ASAH1	0.427838	0.373389	-0.278922	0.824207	Color2 [DarkGray]	1	4		-0.651717	0.188511	0.45082	0.260683	-0.454492	-0.0123032	0.111731	-0.512326
MICALL1	0.638738	0.229754	0.271597	1.20714	Color2 [DarkGray]	1	4		-0.32517	0.248445	-0.103563	-0.0670053	-0.143968	0.0550146	0.621516	0.306534
CHORDC1	0.224479	0.596377	-0.138279	0.908602	Color2 [DarkGray]	1	4		-0.107633	0.499558	-0.373599	0.342291	0.0617632	0.255989	-0.426297	-0.083956
HIST1H3I	1.00738	0.0983151	0.633249	1.55105	Color2 [DarkGray]	1	4		-1.12882	0.133237	-0.0998622	-0.994647	0.120141	0.153108	-0.0826297	0.252286
RPL12	0.189441	0.646487	-0.0894848	0.939858	Color2 [DarkGray]	1	4		0.127378	-0.238733	0.0346648	-0.131773	-0.635139	0.0142797	0.0854741	-0.0310178
USP10	0.134591	0.733515	-0.0506665	0.96549	Color2 [DarkGray]	1	4		0.0330911	0.0209104	-0.220065	0.0885503	-0.374787	-0.00204985	-0.125276	0.221934
NUFIP2	0.0933729	0.806542	-0.0632368	0.957114	Color2 [DarkGray]	1	4		0.522049	-0.204712	-0.330705	0.0882414	-0.480236	0.280553	-0.00790444	0.0295135
VWA5A	0.125083	0.749751	-0.117977	0.921479	Color2 [DarkGray]	1	4		0.169149	-0.369599	0.931395	-0.0130979	-0.248784	0.00252147	0.70726	-0.21506
ANKRD17	0.621529	0.23904	0.0955359	1.06846	Color2 [DarkGray]	1	4		-0.139864	-0.03607	-0.103848	0.0963008	-0.0290891	0.0391564	0.197511	-0.00891504
PNN	0.338335	0.458843	-0.147985	0.90251	Color2 [DarkGray]	1	4		0.243698	-0.180187	-0.0416717	0.144201	-0.575259	0.156107	0.0292136	-0.0359594
ALDH4A1	0.245964	0.567592	-0.134078	0.911252	Color2 [DarkGray]	1	4		-0.137255	-0.151476	0.676694	0.258032	0.2621	-0.178692	0.136093	-0.109819
CMAS	0.766244	0.171299	0.308378	1.23831	Color2 [DarkGray]	1	4		-0.370981	0.0215493	0.200573	-0.0548656	0.582692	-0.0804397	0.0614378	0.466097
LGALS7	0.0885255	0.815595	0.12841	1.09309	Color2 [DarkGray]	1	4		-0.872061	-0.61393	0.0371558	0.50033	-1.27763	-0.044319	0.749734	0.137354
H6PD	0.225123	0.595493	-0.124426	0.917369	Color2 [DarkGray]	1	4		0.13624	-0.00687347	0.616588	-0.13247	0.413032	-0.305661	0.0698059	-0.0613949
C8G	0.405284	0.393293	0.887702	1.85023	Color2 [DarkGray]	1	4		0.0749132	1.14581	-0.200001	-0.0763116	3.50062	-0.265308	-0.364046	1.62396
HTT	0.190397	0.645065	0.0646828	1.04585	Color2 [DarkGray]	1	4		0.288855	-0.0155984	-0.00588873	-0.0862055	0.291571	-0.11534	-0.0199079	0.28357
CD5L	0.115464	0.766542	0.259205	1.19682	Color2 [DarkGray]	1	4		0.0723539	1.068	-0.262809	-0.0735556	2.58506	-0.557019	-0.845325	0.658091
OGFR	0.362156	0.434355	-0.320276	0.800917	Color2 [DarkGray]	1	4		-0.343474	0.979899	0.0559273	0.137321	-0.487685	0.636944	-0.463923	-0.136765
HNRNPH3	2.09835	0.00797347	-0.454636	0.729694	Color2 [DarkGray]	1	4		0.156602	0.0322778	0.172239	0.393347	-0.394733	-0.0296469	-0.412298	-0.227403
NSDHL	0.999736	0.100061	0.403483	1.3227	Color2 [DarkGray]	1	4		0.0504256	-0.323047	-0.0450069	-0.351533	-0.243768	0.459814	0.159635	0.569088
RPL18A	0.333168	0.464336	0.168243	1.12369	Color2 [DarkGray]	1	4		-0.163114	-0.122299	0.0922313	-0.164313	-0.505926	0.278216	0.437921	0.105265
LRRC40	0.00938636	0.978619	0.00404471	1.00281	Color2 [DarkGray]	1	4		-0.0474091	0.324482	-0.0320988	-0.0453908	0.228954	0.154108	0.106552	-0.273851
SNX6	0.858572	0.138493	-0.21386	0.862227	Color2 [DarkGray]	1	4		0.140169	0.396684	0.175738	-0.101714	-0.245611	-0.0265931	0.105254	-0.0776127
GEMIN5	0.0712821	0.848629	-0.0233635	0.983936	Color2 [DarkGray]	1	4		-0.177785	0.113242	-0.100818	0.0603608	-0.314438	0.131684	-0.0464373	0.0307375
SPRR1B	0.187562	0.649288	0.18165	1.13418	Color2 [DarkGray]	1	4		0.164418	-0.646715	0.0255134	-0.363571	-0.867001	-0.031888	0.752912	0.0522219
CPT2	0.0884963	0.81565	-0.0699544	0.952668	Color2 [DarkGray]	1	4		-0.120937	0.496538	0.240724	-0.050297	0.795006	-0.343003	-0.132991	-0.0328019
FDXR	0.655558	0.221025	0.282019	1.2159	Color2 [DarkGray]	1	4		-0.714137	-0.113046	0.222823	-0.205089	0.176997	0.0609014	0.195529	-0.114802
GALE	0.147712	0.711686	0.144992	1.10572	Color2 [DarkGray]	1	4		-0.552947	1.07012	-0.169101	-0.200346	0.0756207	0.388954	0.361494	-0.098379
FKBP3	0.323304	0.475003	-0.296202	0.814394	Color2 [DarkGray]	1	4		0.135546	-0.20753	0.316358	0.23021	-1.11991	0.694967	-0.0990657	-0.186217
LMAN1	0.091406	0.810203	-0.0795621	0.946345	Color2 [DarkGray]	1	4		0.398539	-0.138207	0.540639	-0.00247084	0.021877	-0.0948977	-0.351934	0.905205
PDLIM4	0.0702312	0.850685	-0.0725619	0.950948	Color2 [DarkGray]	1	4		0.204122	0.301037	-0.485455	0.303807	-0.417399	0.949882	-0.227666	-0.271553
DMKN	0.515736	0.304975	0.357826	1.28149	Color2 [DarkGray]	1	4		-0.225587	-0.0554376	0.0323898	0.0869472	-0.25144	-0.0392052	1.15878	0.401486
THBS2	0.0540248	0.88303	0.0902714	1.06457	Color2 [DarkGray]	1	4		0.491044	-0.329053	-0.423667	1.047	1.63558	0.246302	-0.390681	-0.344788
CC2D1A	0.207147	0.620659	-0.121976	0.918928	Color2 [DarkGray]	1	4		0.051068	-0.0367922	-0.195946	0.122452	-0.755625	0.186783	0.196045	-0.174324
FAM114A1	0.943506	0.113892	-0.233796	0.850394	Color2 [DarkGray]	1	4		-0.102511	0.128296	0.135046	0.431205	-0.163377	-0.207439	0.0754805	-0.0478123
RAC1	0.0712498	0.848692	-0.0286346	0.980348	Color2 [DarkGray]	1	4		0.260002	-0.0302453	0.00842623	-0.102967	0.329248	0.0435745	-0.200225	-0.15192
PUM1	0.438647	0.364211	0.245964	1.18588	Color2 [DarkGray]	1	4		-0.232353	-0.0209381	-0.407352	0.114083	0.715284	-0.344433	0.104325	-0.0378789
CUX1	0.534934	0.291787	-0.17866	0.883523	Color2 [DarkGray]	1	4		0.145965	0.0475788	-0.143601	0.0261578	-0.586387	-0.0188765	0.000448633	-0.0337246
METAP1	0.28648	0.517035	0.0927287	1.06639	Color2 [DarkGray]	1	4		-0.394083	-0.000213962	0.21099	-0.0265822	-0.00160756	-0.0769119	0.109234	0.130311
DECR1	0.367419	0.429123	0.107882	1.07765	Color2 [DarkGray]	1	4		-0.208442	0.173983	0.0828468	-0.125647	-0.0825733	0.167362	-0.0380625	0.307542
RAB5A	0.319989	0.478642	0.128935	1.09349	Color2 [DarkGray]	1	4		-0.41572	-0.0871915	0.165417	0.0235122	-0.126517	0.0539723	0.381695	-0.107393
KRT79	0.501413	0.3152	0.555916	1.4701	Color2 [DarkGray]	1	4		0.390838	-0.0405324	-0.287626	0.0129668	0.743608	-0.0994162	-0.231182	1.8863
IRF2BP2	0.233157	0.584579	-0.10181	0.931863	Color2 [DarkGray]	1	4		0.106661	-0.124855	-0.0506722	0.112767	-0.379925	0.0446239	-0.343727	0.315688
PRKAR1A	0.86739	0.135709	-0.367755	0.774987	Color2 [DarkGray]	1	4		0.42864	0.225339	0.0885374	-0.132226	0.2698	-0.184845	-0.547719	-0.397967
KLC2	1.22553	0.0594937	-0.532119	0.691539	Color2 [DarkGray]	1	4		0.680443	0.8814	-0.15302	0.410658	0.0383311	-0.192754	-0.0943733	-0.0601969
PPP2R2A	0.16973	0.676503	-0.0912571	0.938704	Color2 [DarkGray]	1	4		-0.311612	0.191338	0.100051	-0.0105876	-0.387833	-0.327259	0.39123	-0.0719769
EXOC8	0.0871967	0.818094	-0.0288036	0.980233	Color2 [DarkGray]	1	4		0.246382	0.0758016	-0.0474579	-0.0474413	-0.127169	0.0364092	0.300713	-0.0978833
SMC4	0.0596208	0.871724	-0.0406227	0.972235	Color2 [DarkGray]	1	4		0.223227	0.245789	-0.422807	-0.207362	0.0937842	0.256681	-0.556389	-0.11772
FBLIM1	0.664771	0.216386	-0.102782	0.931236	Color2 [DarkGray]	1	4		0.0480183	0.219986	-0.0793909	0.0759209	-0.0496369	-0.124663	0.0776506	-0.0499432
VPS53	0.808884	0.15528	0.362289	1.28546	Color2 [DarkGray]	1	4		-0.960016	-0.173308	-0.0940348	0.0137905	0.0744231	0.0956909	0.0546812	0.0107941
KIF13A	0.228169	0.591332	-0.062207	0.957798	Color2 [DarkGray]	1	4		0.107447	0.137495	-0.284794	0.133849	0.0638542	-0.027989	-0.104581	-0.0861144
PGLS	0.0173393	0.960861	0.0134803	1.00939	Color2 [DarkGray]	1	4		-0.617191	-0.0251794	0.193399	-0.0515888	-0.690447	0.0970715	0.19007	-0.0433334
CASP1	0.309425	0.490428	-0.188323	0.877625	Color2 [DarkGray]	1	4		0.051737	0.919031	-0.0847512	0.0331968	-0.118257	0.346113	0.058587	-0.120523
ACTL6A	0.551715	0.280727	-0.1624	0.893537	Color2 [DarkGray]	1	4		-0.0148264	0.000823218	-0.01121	0.13776	-0.475908	0.161121	-0.156312	-0.0659533
MAP2K3	0.638558	0.229849	0.300738	1.23177	Color2 [DarkGray]	1	4		-0.0431938	-0.0508327	-0.0117258	-0.0239372	0.839014	-0.229834	0.109135	0.354947
BCLAF1	0.40629	0.392383	-0.123282	0.918097	Color2 [DarkGray]	1	4		0.0634512	-0.170619	0.111015	0.102358	-0.419073	0.106875	0.030818	-0.105545
DEK	1.65246	0.0222607	-0.420482	0.747175	Color2 [DarkGray]	1	4		0.112295	0.0440797	0.138714	0.120623	-0.626822	-0.0422113	-0.455844	-0.141341
RAB6A	0.0703519	0.850449	-0.0269076	0.981522	Color2 [DarkGray]	1	4		-0.0669614	-0.113155	0.0679086	0.246076	-0.2423	-0.113637	0.220887	0.161289
MARK2	0.29538	0.506548	-0.0770741	0.947978	Color2 [DarkGray]	1	4		-0.0228901	0.276169	-0.0878098	0.247227	0.0218404	-0.135503	0.107869	0.110194
NUP107	1.40124	0.0396968	0.367278	1.28992	Color2 [DarkGray]	1	4		-0.484566	-0.181829	0.101536	-0.144815	0.0510307	0.306632	0.0788253	0.322951
SORD	0.87164	0.134388	-0.284189	0.821203	Color2 [DarkGray]	1	4		-0.137763	0.43705	0.133436	0.0699769	-0.112482	-0.0865713	-0.482186	0.0471837
HIST1H1E	0.320224	0.478383	-0.457425	0.728285	Color2 [DarkGray]	1	4		0.668094	-1.62135	0.150803	0.236289	-1.25803	-0.168315	-1.06616	0.0966523
RPS8	0.203859	0.625375	-0.126964	0.915757	Color2 [DarkGray]	1	4		-0.0349287	-0.101537	0.0770178	-0.0485048	-0.871498	0.0895244	0.20069	-0.0345244
SELENBP1	0.552468	0.280241	0.546051	1.46008	Color2 [DarkGray]	1	4		-0.822679	-0.521708	0.0857033	-0.084041	1.19898	-0.771722	0.415355	-0.00113596
LYN	0.0291416	0.935101	-0.0251874	0.982693	Color2 [DarkGray]	1	4		0.189413	-0.0955636	0.0500426	-0.0887839	0.727463	-0.263643	-0.624522	0.115061
VAC14	0.642877	0.227574	-0.218853	0.859248	Color2 [DarkGray]	1	4		0.56126	-0.00432324	-0.000607313	-0.02245	-0.276929	-0.0951558	0.107246	-0.0766932
SUN1	0.306354	0.493907	-0.0992995	0.933486	Color2 [DarkGray]	1	4		-0.0142074	-0.0910705	0.143468	0.0140404	-0.397395	0.0742715	0.163154	-0.184998
STK39	0.151287	0.70585	-0.0865061	0.941801	Color2 [DarkGray]	1	4		-0.134979	0.129596	0.421845	-0.0156659	0.00229466	0.00511137	0.47055	-0.423184
MTHFD1L	0.253637	0.557651	0.134763	1.09791	Color2 [DarkGray]	1	4		0.0994711	-0.170714	0.057002	-0.0964567	0.573454	-0.221182	-0.263975	0.340058
BIN1	0.272668	0.533743	-0.156663	0.897098	Color2 [DarkGray]	1	4		-0.139795	0.143749	0.27851	0.0246078	-0.187912	0.517333	-0.540441	-0.10856
UBE3A	0.683094	0.207447	-0.0669354	0.954664	Color2 [DarkGray]	1	4		-0.086423	0.10828	0.00298202	-0.00466431	-0.124655	-0.00604977	-0.0775974	-0.0392646
N4BP1	0.149567	0.708652	0.0906848	1.06488	Color2 [DarkGray]	1	4		-0.0452973	-0.183904	-0.221111	0.338927	-0.503278	0.255197	0.153354	0.346081
TOP2A	0.379097	0.417737	-0.18917	0.87711	Color2 [DarkGray]	1	4		0.526468	-0.0957604	-0.290973	0.123615	-0.17265	0.120178	-0.463121	0.0222638
ARHGAP17	0.21525	0.609186	-0.113593	0.924283	Color2 [DarkGray]	1	4		-0.372441	0.486971	0.0523574	0.166512	-0.0306951	0.230314	0.00158825	-0.322182
RBMX	0.166199	0.682026	0.202457	1.15066	Color2 [DarkGray]	1	4		-0.631477	-0.0214702	0.47064	-0.549171	-1.11451	0.655463	0.104846	0.43255
IPO11	0.791187	0.161738	0.179851	1.13277	Color2 [DarkGray]	1	4		-0.328711	0.167926	-0.00936486	-0.173382	0.126634	0.00414673	0.07336	0.17173
TNPO3	0.281395	0.523124	-0.0611666	0.958489	Color2 [DarkGray]	1	4		-0.0688527	0.16946	0.000165094	0.204385	0.194804	-0.00552441	-0.0502671	-0.0785203
SNX5	0.257001	0.553349	-0.129076	0.914417	Color2 [DarkGray]	1	4		-0.175512	0.0441738	0.421331	-0.0727725	-0.462367	-0.167054	0.287288	0.0430463
PCYT1A	0.290952	0.511738	0.125393	1.0908	Color2 [DarkGray]	1	4		-0.179421	0.207285	-0.16899	0.0041824	-0.244742	0.426529	0.26995	-0.0871079
F5	0.399632	0.398445	0.537445	1.4514	Color2 [DarkGray]	1	4		0.720946	0.0754432	-0.362529	-0.107121	2.17703	-0.228664	-0.0155067	0.543667
BCAM	0.434841	0.367417	0.398915	1.31852	Color2 [DarkGray]	1	4		0.0480845	-0.950942	-0.0425722	0.365418	-0.290385	0.656138	-0.215713	0.865607
CLSTN1	0.369762	0.426813	0.398457	1.3181	Color2 [DarkGray]	1	4		-0.277832	0.181693	-0.651419	-0.0112884	1.40973	0.127666	-0.631149	-0.0712665
SRC	0.352702	0.443913	0.0906558	1.06485	Color2 [DarkGray]	1	4		0.0321507	0.0763061	-0.143958	-0.0315542	0.329659	-0.140819	-0.00620194	0.11293
EIF2B1	0.0286945	0.936064	0.0155437	1.01083	Color2 [DarkGray]	1	4		-0.499808	0.0613516	-0.0861051	0.163722	-0.404043	0.123008	-0.0473414	0.0297122
F9	0.271781	0.534834	0.436186	1.35302	Color2 [DarkGray]	1	4		0.110992	-0.0310118	-0.575349	0.00382412	2.14523	-0.589611	-0.588993	0.286575
ENO2	0.210002	0.616593	0.139323	1.10139	Color2 [DarkGray]	1	4		-0.57065	-0.178645	0.410608	0.13346	0.508966	-0.202677	-0.104798	0.150575
ZMPSTE24	0.343153	0.453782	0.410549	1.32919	Color2 [DarkGray]	1	4		-0.223866	0.226547	0.205659	-0.0231104	1.95435	-0.151909	0.0843771	-0.0593903
MMP8	0.95471	0.110992	-0.565715	0.675621	Color2 [DarkGray]	1	4		0.434469	-0.160346	-0.0344975	0.624149	0.107803	-0.524376	-0.939602	-0.0429109
HIST1H1B	0.984133	0.103721	-0.754531	0.592739	Color2 [DarkGray]	1	4		0.551308	-0.241648	0.295339	0.181808	-1.17625	-0.379488	-1.05208	0.376511
SRSF1	0.405588	0.393018	-0.236039	0.849073	Color2 [DarkGray]	1	4		-0.31138	-0.0680152	0.0440535	0.183318	-0.769092	0.136738	-0.579074	0.115248
YKT6	0.218546	0.604581	-0.115088	0.923326	Color2 [DarkGray]	1	4		0.204859	0.0413465	-0.114585	-0.0697426	-0.405093	0.0978471	0.362901	-0.454128
MCTS1	0.0384655	0.915239	-0.0178537	0.987701	Color2 [DarkGray]	1	4		-0.304	0.0351557	-0.0578078	0.073422	-0.39233	0.230605	-0.204123	0.0412021
HIST2H3C	1.10741	0.078089	-0.569591	0.673808	Color2 [DarkGray]	1	4		0.0173029	0.645946	0.73951	-0.0166328	-0.159025	0.154259	-0.705021	-0.182451
PSME3	0.0831272	0.825796	-0.072662	0.950882	Color2 [DarkGray]	1	4		-0.436016	-0.0588664	0.035589	0.358277	-0.817676	0.417057	-0.187485	0.196439
DYNLL1	0.153345	0.702515	0.111586	1.08042	Color2 [DarkGray]	1	4		-0.0223374	-0.264584	0.217756	-0.0160714	-0.566424	0.379576	0.614395	-0.0664381
MICAL1	0.886176	0.129964	-0.222	0.857376	Color2 [DarkGray]	1	4		0.412397	-0.0705632	0.0531851	0.152383	0.101682	-0.252292	-0.0562492	-0.133737
RPL19	0.245107	0.568713	-0.202838	0.86884	Color2 [DarkGray]	1	4		0.0449607	-0.272907	0.155509	-0.0446789	-1.18193	0.187415	0.175779	-0.109735
PPIA	0.315564	0.483545	-0.227519	0.854102	Color2 [DarkGray]	1	4		-0.340286	-0.0523788	0.0295235	0.402879	-0.984118	0.128539	-0.144205	0.129446
CORO1B	1.0188	0.0957628	-0.228669	0.853422	Color2 [DarkGray]	1	4		0.211596	-0.0421237	0.019827	0.190266	-0.418158	-0.0561145	-0.083185	0.0223448
GSDMA	0.0903416	0.812191	0.165268	1.12137	Color2 [DarkGray]	1	4		-0.371415	1.6539	-0.366704	-0.0227135	0.0423444	-0.373945	0.170833	1.7149
HPRT1	0.2003	0.630521	0.223797	1.1678	Color2 [DarkGray]	1	4		-0.0298285	0.113568	-0.0387353	-0.251941	-0.82778	1.2974	0.113006	0.105625
ADD1	0.158852	0.693662	0.0877093	1.06268	Color2 [DarkGray]	1	4		0.326137	-0.272771	0.176948	-0.0971204	-0.0138569	-0.101287	0.60913	-0.00995431
HIST1H1D	1.0737	0.0843924	-0.924804	0.526752	Color2 [DarkGray]	1	4		-0.0206805	-0.133464	0.921943	0.655119	-1.159	0.146665	-1.24264	-0.0213172
PSMB3	0.107865	0.780072	-0.107399	0.92826	Color2 [DarkGray]	1	4		-0.701701	0.622129	0.00811039	0.181581	-0.718092	0.464017	0.0202438	-0.0856443
CLASP2	0.233464	0.584165	-0.101966	0.931763	Color2 [DarkGray]	1	4		-0.2528	0.4106	0.0977383	0.135378	-0.131103	-0.112523	-0.105238	0.331917
GNAQ	0.0390663	0.913974	0.0209382	1.01462	Color2 [DarkGray]	1	4		0.0296958	-0.0148385	0.417709	-0.302622	0.329407	-0.22014	0.0358505	0.068579
PI4KA	0.38807	0.409194	0.172103	1.1267	Color2 [DarkGray]	1	4		-0.285248	0.133659	-0.176756	0.00742958	0.583945	-0.0185192	-0.198382	0.000454822
PXN	0.0545108	0.882042	0.0378227	1.02656	Color2 [DarkGray]	1	4		0.352937	0.0772977	-0.436854	-0.109209	0.4331	0.159338	-0.374684	-0.182291
TMX1	0.111551	0.77348	0.0546905	1.03864	Color2 [DarkGray]	1	4		0.11028	0.140185	-0.110124	-0.170614	-0.320112	0.394278	-0.126448	0.240771
RPL30	0.108085	0.779678	0.0246687	1.01725	Color2 [DarkGray]	1	4		-0.153953	-0.0709328	0.0250111	-0.0136791	-0.248709	0.0398418	0.0829533	0.0110348
DERA	0.813841	0.153518	0.3266	1.25405	Color2 [DarkGray]	1	4		-0.60653	8.56448e-05	-0.232484	-0.00151132	0.0549231	0.00357556	0.522083	-0.114622
GLO1	0.179622	0.661269	-0.11233	0.925093	Color2 [DarkGray]	1	4		-0.237782	0.108029	-0.0196943	-0.0159748	-0.697966	0.103442	0.34199	-0.362211
STK10	0.0430788	0.905568	0.0396063	1.02783	Color2 [DarkGray]	1	4		0.162602	0.205324	-0.299429	-0.177307	0.666333	-0.281667	-0.649169	0.314119
AGO2	2.10824	0.00779408	0.168561	1.12394	Color2 [DarkGray]	1	4		-0.018117	0.00264696	-0.157319	-0.029473	0.109415	0.162083	0.056625	0.143858
TMEM173	0.0115433	0.973771	-0.0134985	0.990687	Color2 [DarkGray]	1	4		-0.148746	0.0403106	0.417219	-0.733032	-0.00800318	0.247579	0.315398	-1.03322
NIT2	0.158472	0.694269	-0.0476918	0.967483	Color2 [DarkGray]	1	4		-0.11829	-0.0288599	0.0499753	0.00174113	-0.365215	-0.0724833	0.164297	-0.0128007
MAP2K2	0.261362	0.54782	0.223026	1.16718	Color2 [DarkGray]	1	4		-1.18496	0.329027	-0.0581023	0.214503	0.192942	-0.0274608	0.057201	-0.0301127
CKM	0.706769	0.19644	0.73282	1.66188	Color2 [DarkGray]	1	4		-0.0218251	-0.633148	0.469666	0.0212604	-0.0326413	1.73223	-0.0904841	1.15812
DMKN	0.199319	0.631948	0.297741	1.22922	Color2 [DarkGray]	1	4		0.083639	-0.0715581	0.354948	-0.369272	-0.94028	-0.178834	1.73723	0.570606
RAE1	0.0194711	0.956156	0.00851417	1.00592	Color2 [DarkGray]	1	4		0.058643	0.0226655	-0.0880776	0.0629804	-0.313552	-0.0195683	0.0333094	0.390079
FERMT2	0.320322	0.478275	-0.138522	0.908449	Color2 [DarkGray]	1	4		0.0539189	-0.457042	0.220086	0.229944	0.00914195	-0.107971	-0.376695	-0.0316572
BAG6	0.0494599	0.89236	-0.0164365	0.988672	Color2 [DarkGray]	1	4		-0.285734	0.0985887	0.01378	0.0215261	0.0106056	-0.0989828	0.122493	-0.251702
EXOC6B	0.500679	0.315734	0.149315	1.10904	Color2 [DarkGray]	1	4		-0.441062	-0.0273481	-0.0228309	0.127313	-0.0144716	0.0830936	0.219074	-0.0543622
RPTN	0.479479	0.331529	0.730348	1.65904	Color2 [DarkGray]	1	4		0.571267	-0.762845	0.0706318	-0.412255	-0.531409	-0.081252	2.32498	0.675868
SCYL1	0.277871	0.527386	-0.0823583	0.944512	Color2 [DarkGray]	1	4		0.360311	-0.086769	0.0645566	-4.15344e-05	0.217011	-0.010791	-0.0733818	-0.124214
CNBP	0.263443	0.545202	0.370031	1.29238	Color2 [DarkGray]	1	4		-0.339358	-0.769103	0.0475496	-0.0860544	-1.55627	0.759405	0.595235	0.534785
PCK2	0.0139028	0.968495	0.00533244	1.0037	Color2 [DarkGray]	1	4		-0.214719	-0.0447133	0.0222882	0.100099	0.105322	-0.300236	-0.112627	0.191824
AKR1C3	0.368727	0.427832	-0.408161	0.753583	Color2 [DarkGray]	1	4		0.127804	-0.121409	0.268104	0.168237	-0.198264	-1.57161	-0.134247	0.714215
ABCC1	1.07777	0.0836038	0.240316	1.18125	Color2 [DarkGray]	1	4		-0.204335	-0.0629253	0.151973	-0.0506363	0.288276	0.0291313	0.0703771	0.407554
NFKB2	0.242306	0.572392	-0.12334	0.91806	Color2 [DarkGray]	1	4		-0.00897335	0.023264	-0.0869728	0.0959758	0.179758	0.274724	-0.549355	-0.375194
MAP4K4	0	1	NaN	#VALUE!	Color2 [DarkGray]	1	4		NaN	NaN	NaN	NaN	NaN	NaN	NaN	NaN
MAOA	0.396782	0.401068	0.358357	1.28196	Color2 [DarkGray]	1	4		0.198705	-1.04161	0.302026	-0.435952	0.756124	-0.311344	0.233869	-0.222058
ABR	1.06116	0.0868638	-0.302933	0.810603	Color2 [DarkGray]	1	4		-0.0536218	0.421298	0.0609411	0.261982	-0.286259	0.0589404	0.0391046	-0.332919
EIF3F	0.342299	0.454675	0.109424	1.0788	Color2 [DarkGray]	1	4		-0.360684	0.269181	0.000756181	-0.156969	-0.0261019	0.125571	0.0737165	0.0167959
APOBR	1.09413	0.0805138	-0.630345	0.646022	Color2 [DarkGray]	1	4		0.730527	0.153797	0.0158288	0.0335815	0.00846846	-0.285062	-1.1193	-0.191751
CSTF2	0.122428	0.754349	-0.0967762	0.93512	Color2 [DarkGray]	1	4		0.0384776	-0.247617	0.072559	-0.0380072	-0.97622	0.288978	-0.0368407	0.162391
GAA	0.565586	0.271903	-0.516727	0.698956	Color2 [DarkGray]	1	4		-0.804312	0.45036	0.712814	0.300549	-0.640226	0.431577	-0.723275	-0.47557
FDXR	0.507038	0.311145	0.208522	1.1555	Color2 [DarkGray]	1	4		-0.45789	0.0290509	0.105165	-0.106906	-0.147783	-0.0262483	0.502566	0.0749747
PDAP1	0.216711	0.60714	-0.166492	0.891006	Color2 [DarkGray]	1	4		-0.0192673	-0.196423	0.0241879	0.106329	-1.01958	0.169466	0.323226	-0.22425
SRPRA	0.239937	0.575523	0.0927804	1.06642	Color2 [DarkGray]	1	4		-0.190828	0.219771	0.0610913	-0.185973	-0.0403693	0.170004	-0.202834	0.348382
MPRIP	0.0873048	0.817891	-0.0405701	0.972271	Color2 [DarkGray]	1	4		-0.245329	-0.0201285	0.0589783	0.0561682	-0.493697	0.0219224	0.233242	-0.0740584
ENO3	0.888609	0.129238	0.86063	1.81583	Color2 [DarkGray]	1	4		-0.38962	-0.554965	-0.0131982	0.0760952	0.0381732	1.49804	-0.345948	1.37056
RPS10	0.118281	0.761585	-0.0960334	0.935602	Color2 [DarkGray]	1	4		0.0513059	-0.322467	0.127473	-0.100609	-0.975072	0.114275	0.325132	-0.0927657
RAB6A	0.808226	0.155516	0.539591	1.45356	Color2 [DarkGray]	1	4		-1.07262	0.216255	-0.0406575	-0.0709914	0.00507093	0.0350195	0.727771	0.422494
GLTP	0.299766	0.501457	0.282852	1.2166	Color2 [DarkGray]	1	4		-0.180199	0.0668353	0.14791	-0.097509	-0.553471	-0.13458	1.21651	0.53999
ITPA	0.0803447	0.831104	0.0584698	1.04136	Color2 [DarkGray]	1	4		-0.322115	0.311227	0.0297169	-0.0668123	-0.432445	-0.175161	0.176073	0.617428
EPHA2	0.107627	0.7805	-0.045117	0.969211	Color2 [DarkGray]	1	4		0.190842	0.351836	-0.0729033	-0.210115	-0.0846116	-0.107943	0.278219	-0.00647201
CNBP	0.369561	0.427011	0.309952	1.23967	Color2 [DarkGray]	1	4		-0.668184	-0.57699	0.0385344	-0.0762649	-0.948663	0.459599	0.264834	0.181133
RPS24	0.21338	0.611815	0.164807	1.12102	Color2 [DarkGray]	1	4		-0.527288	0.0677701	0.0851737	-0.161004	-0.623962	0.22618	0.661705	-0.140045
ATP5PB	0.748509	0.17844	0.168377	1.12379	Color2 [DarkGray]	1	4		-0.371926	-0.00681955	0.0899581	-0.0923959	0.0406812	0.0279303	0.00750469	0.216208
CSK	0.947087	0.112957	-0.250283	0.840732	Color2 [DarkGray]	1	4		0.0375346	0.437653	0.198682	-0.0370415	0.149653	-0.235293	-0.103516	-0.175148
GALNT7	0.743988	0.180307	-0.208281	0.865568	Color2 [DarkGray]	1	4		0.0478525	0.388082	-0.1557	0.12701	-0.153104	0.0976674	-0.28127	-0.0891721
TUBG1	0.0291435	0.935097	-0.0140192	0.99033	Color2 [DarkGray]	1	4		-0.179631	0.139262	-0.0172173	0.0446161	0.393442	0.0120194	-0.296003	-0.178504
HSPA6	0.249452	0.563051	0.261818	1.19899	Color2 [DarkGray]	1	4		0.026566	-0.0116782	-0.79225	0.16967	0.152563	1.12571	-0.281528	-0.557171
HEPHL1	0.402914	0.395445	-0.320646	0.800711	Color2 [DarkGray]	1	4		0.635929	0.884521	-0.340209	0.0823625	0.599904	-0.414714	-0.0324108	-0.172759
RALY	0.674627	0.211531	-0.259004	0.835664	Color2 [DarkGray]	1	4		0.101007	-0.089455	-0.0320857	0.130298	-0.647069	0.0266945	-0.404751	0.0988724
ALDH16A1	0.0109778	0.97504	0.00265465	1.00184	Color2 [DarkGray]	1	4		-0.0861579	-0.0617915	0.0886802	0.128969	-0.0772452	-0.0928355	0.143268	0.107131
APPL1	0.369239	0.427327	-0.10687	0.9286	Color2 [DarkGray]	1	4		0.0454272	-0.111307	0.175042	-0.0184047	0.0380358	-0.398339	0.0946879	-0.0711079
ALDH1A3	0.243601	0.570688	-0.446905	0.733615	Color2 [DarkGray]	1	4		-0.0566189	2.22773	-0.432646	0.0533177	0.683225	-0.889229	-0.613486	0.823659
MPRIP	0.830102	0.147876	-0.337588	0.791363	Color2 [DarkGray]	1	4		-0.046518	-0.0359678	0.151227	0.308758	-0.458087	0.158776	-0.640643	-0.0328995
RAB5B	0.0582482	0.874484	-0.0375747	0.974291	Color2 [DarkGray]	1	4		-0.088445	-0.418114	0.408056	0.348632	-0.131192	-0.163167	0.354306	0.0398829
PSIP1	0.861913	0.137432	-0.314756	0.803987	Color2 [DarkGray]	1	4		0.00969213	-0.187422	0.118213	0.246229	-0.411777	0.0364143	-0.646351	-0.0506003
VDAC3	1.33896	0.0458183	-0.310695	0.806253	Color2 [DarkGray]	1	4		0.429584	0.296536	0.311177	-0.074679	0.092352	-0.144547	-0.0657365	-0.162229
STK26	0.267594	0.540015	0.144635	1.10545	Color2 [DarkGray]	1	4		-0.226567	0.33591	-0.177128	-0.0711597	0.194454	0.0589027	-0.347801	0.534039
DDX27	0.203794	0.625469	0.107903	1.07766	Color2 [DarkGray]	1	4		-0.253932	0.196202	0.010544	-0.0477889	0.616797	-0.016205	-0.269851	0.00589469
CLASP1	0.740715	0.181671	-0.203488	0.868449	Color2 [DarkGray]	1	4		0.403739	-0.175579	0.331591	0.113106	0.049981	-0.0116093	-0.107553	-0.0719123
TBC1D9B	1.2048	0.0624023	-0.231766	0.851592	Color2 [DarkGray]	1	4		0.000262422	0.240275	0.145999	0.0838375	-0.265493	0.0305789	0.0454116	-0.267187
LTBP2	0.0134461	0.969514	-0.0222235	0.984714	Color2 [DarkGray]	1	4		0.2072	-1.31157	0.934892	0.0905722	-0.418354	-0.11038	0.830436	-0.469501
ASS1	0.132845	0.736469	-0.191663	0.875596	Color2 [DarkGray]	1	4		-0.767296	0.806632	-0.844295	0.689868	-1.12128	0.225019	-0.055411	0.0699304
RPS23	0.192028	0.642647	-0.133354	0.91171	Color2 [DarkGray]	1	4		-0.30128	-0.0929816	0.0799675	0.0752874	-0.958981	0.160723	0.0354668	-0.00963051
RAB18	0.579299	0.263452	-0.32919	0.795983	Color2 [DarkGray]	1	4		-0.162586	0.488413	0.022666	0.0184366	0.00129325	-0.377693	0.233242	-0.806673
TNPO2	0.422553	0.377961	0.46642	1.38168	Color2 [DarkGray]	1	4		-1.93746	0.094483	0.0428341	-0.196488	-0.219677	0.0439833	0.141581	-0.0968411
PXDN	0.130619	0.740255	-0.105241	0.92965	Color2 [DarkGray]	1	4		0.443667	-0.0747414	-0.0687829	0.13065	0.789847	-0.339256	-0.43047	-0.0102919
TP53BP1	0.629004	0.234961	-0.213141	0.862657	Color2 [DarkGray]	1	4		0.0946805	-0.304181	0.269849	0.113413	-0.345086	-0.067487	-0.344503	0.0782733
IDO1	0.586025	0.259403	-1.22071	0.42907	Color2 [DarkGray]	1	4		0.182844	3.90457	-0.435907	0.574691	0.140353	-0.145214	-0.482101	-0.169702
TACSTD2	0.00855041	0.980504	-0.0103362	0.992861	Color2 [DarkGray]	1	4		0.401013	-1.11331	0.471722	-0.0885068	0.105079	-0.34038	0.300315	-0.435437
DLAT	0.612465	0.244082	-0.103626	0.930691	Color2 [DarkGray]	1	4		0.00966309	0.0962892	0.303434	-0.0590931	-0.00823321	0.0238119	-0.0292191	-0.0505716
SRPRB	1.77762	0.0166871	0.525144	1.43908	Color2 [DarkGray]	1	4		-0.62758	-0.0115838	-0.125747	-0.256141	0.302352	0.1831	0.0950985	0.498974
40422	0.338884	0.458265	0.383602	1.30459	Color2 [DarkGray]	1	4		-0.548696	-0.281873	0.185681	0.0224581	-0.907129	0.881152	1.04423	-0.106273
EPN1	0.412265	0.387022	-0.194176	0.874072	Color2 [DarkGray]	1	4		-0.018175	0.0320378	0.0776014	-0.115614	-0.630943	0.110915	0.183737	-0.464565
PRPF31	0.752223	0.17692	0.307964	1.23796	Color2 [DarkGray]	1	4		-0.166939	0.0251206	-0.186773	-0.0525895	0.548345	0.0433878	-0.258638	0.51758
PPP6R1	0.0624781	0.866008	0.0263473	1.01843	Color2 [DarkGray]	1	4		-0.101517	0.233021	-0.076452	0.0382986	0.343076	-0.127749	-0.201417	0.184829
DHX38	0.10244	0.789878	0.0115801	1.00806	Color2 [DarkGray]	1	4		0.0336406	-0.0188413	-0.0277256	0.0432371	-0.0410856	0.0811104	-0.0501166	0.0867228
SPATS2L	0.373846	0.422819	-0.227975	0.853833	Color2 [DarkGray]	1	4		0.241069	-0.00627146	-0.0151558	0.345262	-0.246598	0.630324	-0.524201	-0.206518
NANS	0.135796	0.731482	-0.108944	0.927267	Color2 [DarkGray]	1	4		-0.484503	0.105466	0.172387	0.308348	-0.155487	-0.111163	-0.634786	0.56736
MIA3	0.417516	0.38237	0.139333	1.1014	Color2 [DarkGray]	1	4		0.260118	-0.299053	0.0326868	-0.161592	0.235017	-0.0395228	-0.0569443	0.250943
RCC1	0.680384	0.208745	-0.209597	0.864779	Color2 [DarkGray]	1	4		0.0242743	-0.0997711	0.025907	-0.0236005	-0.541734	0.0178566	-0.410917	0.0232166
BAIAP2L1	1.1012	0.0792136	-0.314369	0.804203	Color2 [DarkGray]	1	4		0.17921	0.206468	-0.103903	0.334568	-0.436082	0.0935636	-0.0426332	-0.25598
CAV1	0.0353943	0.921734	-0.0186397	0.987163	Color2 [DarkGray]	1	4		0.0356475	-0.453645	-0.0190315	0.198347	0.0439988	0.141547	-0.395726	-0.10306
PAK1	0.208998	0.618019	-0.124401	0.917385	Color2 [DarkGray]	1	4		0.146091	0.672463	-0.016217	-0.0867044	0.0411937	-0.122143	-0.21761	0.516587
LYAR	0.24355	0.570756	-0.135774	0.910181	Color2 [DarkGray]	1	4		-0.0490885	0.0467597	0.15632	-0.00841112	-0.471755	0.516988	-0.368564	-0.074187
EPB41L1	0.0772576	0.837033	0.125331	1.09076	Color2 [DarkGray]	1	4		0.246817	-1.12787	1.22918	-0.298722	-0.509331	-0.257628	0.790076	0.527604
ABCF3	0.262164	0.546809	0.113201	1.08163	Color2 [DarkGray]	1	4		0.255483	-0.388028	-0.210968	0.0700425	-0.0564731	0.220188	0.216417	-0.200797
MRPL12	0.243918	0.570271	0.0754452	1.05369	Color2 [DarkGray]	1	4		-0.0511981	-0.147098	0.179183	0.0452969	-0.18616	0.219743	0.0208648	0.273518
MECP2	0.617028	0.241531	-0.336321	0.792058	Color2 [DarkGray]	1	4		0.0315363	-0.400669	0.721602	0.422588	-0.387431	-0.000470793	-0.154229	-0.0280978
KRAS	0.0954803	0.802638	0.0204871	1.0143	Color2 [DarkGray]	1	4		-0.10278	-0.162424	0.120145	0.00880114	-0.110034	0.0103452	0.107761	-0.0623812
FHL2	0.607843	0.246693	0.20226	1.1505	Color2 [DarkGray]	1	4		0.0597884	-0.28231	-0.419869	0.0657371	0.332131	-0.126884	0.0583812	-0.0312423
ACOX3	0.443726	0.359977	0.31819	1.24677	Color2 [DarkGray]	1	4		-0.805404	-0.0411465	0.442504	-0.386927	-0.220207	0.0440128	0.636307	0.0216718
HRAS	0.0990444	0.796078	0.0528126	1.03729	Color2 [DarkGray]	1	4		-0.462978	0.214873	0.105139	-0.114827	-0.28239	0.0827302	0.29175	-0.138632
ATP6V0D1	0.204854	0.623945	0.0637995	1.04521	Color2 [DarkGray]	1	4		0.201611	-0.0532875	-0.117984	0.0250331	0.285029	-0.127803	-0.0657489	0.219095
RPS5	0.317936	0.480911	0.122298	1.08847	Color2 [DarkGray]	1	4		-0.169962	-0.111423	0.0270642	-0.063992	-0.420778	0.274053	0.189697	0.127905
PRPF6	1.78185	0.0165254	-0.204867	0.867619	Color2 [DarkGray]	1	4		0.0742937	0.122683	-0.0124653	-0.0231946	-0.230806	-0.121435	-0.265056	-0.0408537
RBM12	0.488105	0.325008	-0.198328	0.87156	Color2 [DarkGray]	1	4		-0.0183654	0.10347	-0.0363145	0.0702078	-0.227469	0.0308136	-0.653575	0.175915
HEBP1	0.995689	0.100998	0.240942	1.18176	Color2 [DarkGray]	1	4		-0.0728253	-0.333057	0.0504658	-0.0892483	0.153428	-0.143369	0.288128	0.220917
ASNA1	0.149451	0.708841	0.102979	1.07399	Color2 [DarkGray]	1	4		-0.708539	0.0107855	0.263943	0.177642	-0.152578	-0.0745486	0.462133	-0.079258
ZW10	0.945278	0.113428	0.278548	1.21297	Color2 [DarkGray]	1	4		-0.476751	0.141184	-0.105046	-0.0613504	0.0798597	0.321009	-0.0252445	0.236602
STAT5B	0.204608	0.624298	-0.117124	0.922024	Color2 [DarkGray]	1	4		-0.216512	0.383899	0.103969	-0.0107921	0.464273	-0.159051	-0.441386	-0.0717695
AIP	1.18334	0.0655635	-0.440435	0.736912	Color2 [DarkGray]	1	4		0.529326	0.0659341	-0.0911665	0.185443	-0.415677	-0.171171	-0.573987	0.0886317
CHERP	0.87892	0.132154	-0.239653	0.846949	Color2 [DarkGray]	1	4		0.02994	-0.0150857	0.00387009	0.0170853	-0.592473	0.0360847	-0.0845762	-0.281838
PYCARD	0.0230406	0.94833	0.0187535	1.01308	Color2 [DarkGray]	1	4		-0.465117	0.0551032	-0.0182629	-0.163974	-0.878992	0.221493	0.0929063	0.0473549
TSN	0.511574	0.307912	0.267681	1.20387	Color2 [DarkGray]	1	4		-0.86731	0.00497513	-0.0761852	-0.031834	-0.325548	0.155229	0.185426	0.0852621
ITGA5	0.226566	0.593519	-0.252103	0.839671	Color2 [DarkGray]	1	4		0.200191	0.275012	-0.285965	0.399021	1.10595	-0.194451	-0.784799	-0.546852
RPL32	0.0488168	0.893682	-0.0382171	0.973858	Color2 [DarkGray]	1	4		-0.424117	-0.0356352	0.04449	-0.0951298	-0.915955	0.100075	0.185838	-0.0332187
DDX24	0.0594944	0.871978	-0.0468219	0.968067	Color2 [DarkGray]	1	4		0.494115	-0.306597	-0.10363	0.0628611	-0.497724	0.551151	-0.163807	0.0698424
RBM39	0.159921	0.691957	-0.0559833	0.961939	Color2 [DarkGray]	1	4		-0.0658337	-0.250904	0.0669066	0.0840496	-0.316145	0.112277	-0.256679	0.0708324
TRIP10	0.311073	0.48857	-0.0592259	0.959779	Color2 [DarkGray]	1	4		0.0517904	0.112459	0.168096	-0.0956999	-0.0627793	-0.12299	0.058531	0.12698
MAT2A	0.809052	0.15522	-0.350832	0.784132	Color2 [DarkGray]	1	4		0.17185	0.441563	-0.313456	0.117191	-0.656916	-0.0400798	-0.275548	-0.0136338
RAP2C	0	1	NaN	#VALUE!	Color2 [DarkGray]	1	4		NaN	NaN	NaN	NaN	NaN	NaN	NaN	NaN
MAN2B1	0.20102	0.629477	0.136281	1.09907	Color2 [DarkGray]	1	4		-0.664525	-0.218002	0.184505	-0.0175235	0.263235	0.006979	-0.613036	0.172402
PLCD1	0.486307	0.326357	-0.272563	0.827848	Color2 [DarkGray]	1	4		-0.151283	0.748403	-0.000157287	0.103661	-0.506153	0.227136	0.0746498	-0.185262
TBCA	0.552703	0.280089	-0.440459	0.7369	Color2 [DarkGray]	1	4		0.0950298	-0.0281162	0.156843	0.00101967	-1.24179	0.423602	-0.0120931	-0.706783
CSRP2	0.176696	0.665738	0.133528	1.09697	Color2 [DarkGray]	1	4		-0.22392	0.00228041	-0.263512	-0.0291019	-0.839147	0.356315	0.365365	0.137323
PSMA3	0.535189	0.291616	-0.235287	0.849516	Color2 [DarkGray]	1	4		0.15436	0.389943	-0.157694	0.109214	-0.413248	0.352804	-0.0781119	-0.306768
CRK	0.700607	0.199248	-0.0979786	0.934341	Color2 [DarkGray]	1	4		0.135084	-0.0274053	0.00567303	0.159352	-0.155356	-0.0362737	-0.0138228	0.0862414
SH3GLB1	0.270281	0.536684	-0.0837533	0.9436	Color2 [DarkGray]	1	4		-0.0866487	0.0442432	0.0844998	-0.031687	-0.103784	0.0210625	0.165782	-0.407667
RALB	0.376645	0.420102	-0.144701	0.904567	Color2 [DarkGray]	1	4		-0.0930778	0.352036	0.064299	0.0932004	0.326358	-0.0741259	-0.0621349	-0.352443
U2SURP	0.815114	0.153069	0.1766	1.13022	Color2 [DarkGray]	1	4		-0.185172	0.00145046	-0.178964	0.0327056	0.337595	0.0606758	0.0820423	-0.103893
TROVE2	0.744204	0.180217	-0.197186	0.87225	Color2 [DarkGray]	1	4		-0.209356	0.284513	0.198437	0.153499	-0.288673	-0.0979311	0.0241774	0.000775605
ZNF638	1.99021	0.0102281	-0.27886	0.824242	Color2 [DarkGray]	1	4		0.311643	0.165314	0.061943	0.0565995	-0.168663	-0.170944	0.00835305	-0.188686
RHOT2	0.962936	0.108909	0.368246	1.29078	Color2 [DarkGray]	1	4		-0.673669	-0.0575012	0.00345992	-0.165295	0.481383	0.0437289	0.135724	-0.0808557
NDUFS2	0.323475	0.474816	0.0964708	1.06915	Color2 [DarkGray]	1	4		0.0352767	-0.39029	0.200258	-0.137299	0.0474809	0.00257555	0.0237165	0.020056
MARK3	0.37105	0.425549	-0.246019	0.84322	Color2 [DarkGray]	1	4		0.10936	0.495381	-0.294472	-0.0735827	-0.852001	0.239149	-0.123743	-0.0107973
PPM1G	0.843303	0.143449	-0.214722	0.861712	Color2 [DarkGray]	1	4		-0.139752	0.407377	0.11881	0.122833	-0.231333	0.0652016	-0.0640493	-0.119437
CSTB	0.391999	0.40551	-0.53356	0.690848	Color2 [DarkGray]	1	4		0.0963347	-0.0855581	0.670086	-0.923264	-1.56718	0.215574	0.309244	-1.33428
UBE2K	0.223686	0.597467	0.100364	1.07204	Color2 [DarkGray]	1	4		-0.524688	0.16973	-0.0860089	0.176251	0.0308283	0.0192062	-0.135119	0.221826
RIC8A	0.160397	0.691199	0.0852151	1.06085	Color2 [DarkGray]	1	4		-0.517193	0.440371	-0.0154869	-0.0401688	-0.0955171	0.010292	0.126745	0.166862
ITPKC	0.394146	0.40351	-0.273586	0.827261	Color2 [DarkGray]	1	4		-0.120061	1.14465	-0.100104	0.264626	-0.079606	-0.0646084	0.230074	0.00890695
PLOD3	0.5941	0.254625	-0.336671	0.791866	Color2 [DarkGray]	1	4		0.0822606	0.0849211	-0.238461	0.116208	0.246803	-0.0538212	-0.837617	-0.65712
GRIPAP1	0.126948	0.746539	0.0328501	1.02303	Color2 [DarkGray]	1	4		0.0291871	0.279337	-0.114883	-0.138991	0.0401333	0.00996082	0.0614238	0.074533
APP	0.142364	0.720503	-0.1238	0.917767	Color2 [DarkGray]	1	4		0.303432	0.0358566	-0.237548	0.720978	-0.200212	0.856064	-0.222941	-0.105392
TAF15	0.338114	0.459078	-0.307837	0.807852	Color2 [DarkGray]	1	4		-0.0128174	-0.385615	0.132546	0.0801676	-1.46433	0.0989509	-0.0229032	-0.0287827
SNRPA1	0.0982092	0.79761	-0.0384989	0.973667	Color2 [DarkGray]	1	4		0.0359279	-0.0211721	-0.0489014	0.0421804	-0.425732	0.237261	-0.0437854	0.0862955
CUX1	0	1	NaN	#VALUE!	Color2 [DarkGray]	1	4		NaN	NaN	NaN	NaN	NaN	NaN	NaN	NaN
SSH3	0.354959	0.441612	0.195983	1.1455	Color2 [DarkGray]	1	4		0.121858	0.0620639	-0.0868896	-0.14279	0.794145	-0.289207	-0.00154368	0.23478
ARHGAP5	0.216869	0.60692	0.103311	1.07424	Color2 [DarkGray]	1	4		-0.333929	0.486959	-0.225362	-0.162705	0.0334974	0.0426899	0.157412	-0.0553913
DBI	0.1863	0.651178	0.228182	1.17136	Color2 [DarkGray]	1	4		-0.0129977	-0.184729	0.522044	0.0128871	-0.524905	0.516742	1.50662	-0.248524
GOLGA5	0.315085	0.484077	-0.169387	0.889221	Color2 [DarkGray]	1	4		0.452863	-0.067389	-0.0285502	-0.00232062	-0.582524	0.350557	-0.0422512	-0.0487256
S100A7A	1.13234	0.0737333	1.62755	3.08987	Color2 [DarkGray]	1	4		-1.06799	-0.516086	-1.03575	0.32527	0.691133	-0.445708	1.1461	2.8241
NUB1	0.215339	0.609062	-0.144012	0.904999	Color2 [DarkGray]	1	4		-0.0715532	0.814035	0.0684226	0.0409798	-0.0240827	0.583784	-0.132482	-0.151384
BLVRA	0.350926	0.445733	-0.240993	0.846163	Color2 [DarkGray]	1	4		0.253074	0.264159	-0.0767657	-0.0387306	-0.120534	0.0279649	0.435795	-0.90546
TECR	0.0477451	0.895891	0.0309837	1.02171	Color2 [DarkGray]	1	4		0.0374119	0.0440198	0.400213	-0.0562334	-0.0345641	-0.00645638	0.740598	-0.150232
TXNRD1	0.221176	0.60093	0.112714	1.08126	Color2 [DarkGray]	1	4		-0.384323	0.18501	-0.0969983	0.117632	0.532446	-0.134754	-0.140967	0.0154511
CCDC6	0.124605	0.750577	0.106204	1.07639	Color2 [DarkGray]	1	4		-0.254788	-0.211598	0.328302	0.099018	-0.598631	-0.120359	0.708914	0.395827
CSNK2A1	0.784958	0.164075	0.397878	1.31757	Color2 [DarkGray]	1	4		-1.01465	0.116998	-0.172326	-0.151262	0.159177	0.193153	-0.0399515	0.0578931
NDUFA9	1.00673	0.0984621	0.383383	1.3044	Color2 [DarkGray]	1	4		-0.778227	-0.451185	0.156054	-0.24332	0.033691	0.0407415	0.0962194	0.0462034
FCHO2	0.0766307	0.838242	-0.0505627	0.96556	Color2 [DarkGray]	1	4		-0.303377	0.275175	0.0134477	0.12193	-0.47269	-0.0192212	0.510522	-0.113686
PTPN11	0.394624	0.403066	-0.0774577	0.947726	Color2 [DarkGray]	1	4		0.254664	-0.099553	-0.00538173	0.0758328	-0.14523	0.000120211	0.031342	0.0294987
FAM98B	0.0590045	0.872962	0.0301617	1.02113	Color2 [DarkGray]	1	4		0.16233	-0.183303	-0.17163	0.298354	-0.228584	0.360667	-0.0986256	0.192941
AP3M1	0.933588	0.116523	-0.110928	0.925992	Color2 [DarkGray]	1	4		0.0119088	0.0857285	0.0530671	0.058962	-0.124534	0.0191723	0.0595501	-0.188233
EIF3G	0.00976537	0.977765	-0.0045321	0.996864	Color2 [DarkGray]	1	4		0.118096	-0.279398	-0.00642304	-0.0292851	-0.422953	0.203093	0.0135323	-0.00881121
ME1	0.0938893	0.805584	-0.0836276	0.943682	Color2 [DarkGray]	1	4		0.0232538	-0.728975	0.267514	0.256798	-0.747635	0.0078836	0.323381	-0.0995494
AHSG	0.0425315	0.90671	-0.0756435	0.948919	Color2 [DarkGray]	1	4		0.217399	0.758331	-0.310972	-0.247672	1.46912	-1.26728	-0.26089	0.173565
HOOK3	0.770091	0.169789	-0.176599	0.884786	Color2 [DarkGray]	1	4		-0.0754698	0.0274878	0.30803	0.338171	-0.163209	-0.0246073	0.0460014	0.0336388
NACA	0.262614	0.546243	0.312819	1.24213	Color2 [DarkGray]	1	4		-0.895206	-0.153087	0.175668	-0.21317	-1.19732	0.62512	0.666433	0.0712483
PRKAA1	1.02019	0.0954576	0.30816	1.23813	Color2 [DarkGray]	1	4		-0.255597	-0.0649915	-0.148745	0.100996	0.578772	0.0663839	-0.0437837	0.26293
PACSIN2	2.40084	0.00397335	-0.419698	0.747581	Color2 [DarkGray]	1	4		0.248286	0.145935	0.0580481	0.17587	-0.473399	-0.0671567	-0.28363	-0.226465
AKR7A2	0.337934	0.459268	-0.100321	0.932825	Color2 [DarkGray]	1	4		-0.0254856	-0.079654	0.383234	0.182697	-0.114126	0.14672	0.125317	-0.098404
FARSA	0.227426	0.592344	-0.117147	0.922009	Color2 [DarkGray]	1	4		-0.259015	0.235973	0.365013	-0.118778	-0.444869	0.175258	0.160007	-0.13579
MOV10	0.129835	0.741592	0.112736	1.08128	Color2 [DarkGray]	1	4		-0.308898	0.702925	-0.136828	-0.122358	0.701123	0.273551	-0.422032	0.0331427
KHDRBS1	0.566429	0.271376	-0.489724	0.712161	Color2 [DarkGray]	1	4		0.0471364	0.00231372	0.211178	-0.0291358	-1.54411	0.369498	-0.283155	-0.269635
RTKN	0.279528	0.525379	-0.221618	0.857603	Color2 [DarkGray]	1	4		0.0577715	1.00494	-0.396184	0.0416734	0.00258894	0.313239	-0.108523	-0.38558
RAB11FIP1	0.346417	0.450384	-0.193225	0.874649	Color2 [DarkGray]	1	4		-0.0116918	0.169555	0.333373	-0.134642	0.0722721	-0.680504	0.338799	-0.146872
RSU1	0.751414	0.17725	-0.153039	0.899354	Color2 [DarkGray]	1	4		-0.0994613	-0.0046782	0.327475	0.211924	-0.0742815	0.0198108	-0.0588359	-0.0635917
UBE2N	1.41172	0.0387503	-0.342343	0.788759	Color2 [DarkGray]	1	4		0.00797323	0.172614	0.218079	0.195136	-0.488473	0.0230474	-0.0168503	-0.293293
FLAD1	0.276909	0.528556	0.0973956	1.06984	Color2 [DarkGray]	1	4		0.0929305	-0.490609	-0.0192485	0.0641561	0.162823	-0.035711	-0.0323852	-0.0579155
FAM25G	0.0754426	0.840538	0.0941824	1.06746	Color2 [DarkGray]	1	4		0.112724	-0.742084	0.0203449	-0.476673	-1.3275	0.523149	0.0534094	0.0419869
PPP4R3A	0.181818	0.657934	0.0842561	1.06014	Color2 [DarkGray]	1	4		-0.051546	0.236876	-0.14371	-0.190873	-0.366847	0.361215	0.15904	0.0343634
CCDC22	0.527336	0.296937	0.151672	1.11086	Color2 [DarkGray]	1	4		-0.299673	0.0437856	0.131385	-0.247682	-0.0117231	-0.0433836	0.296017	-0.0064068
GNAI1	0.0387352	0.914671	-0.0136454	0.990586	Color2 [DarkGray]	1	4		0.0292168	0.123756	-0.0658157	-0.058448	-0.34627	0.132169	0.0817233	0.106505
DENND4C	1.76547	0.0171607	0.129449	1.09388	Color2 [DarkGray]	1	4		-0.0697769	-0.0151134	-0.00929121	-0.0698141	0.180039	0.0857968	0.0839172	0.00404846
LCN2	0.293505	0.508739	-0.335734	0.792381	Color2 [DarkGray]	1	4		1.21991	-0.609339	-0.322714	0.281308	0.293508	-0.69439	-0.568236	0.195345
RTN4	0.919537	0.120355	1.05732	2.08107	Color2 [DarkGray]	1	4		-2.29065	0.0594088	0.00460487	-1.11955	-0.100527	0.496942	0.568729	-0.0820319
STRN3	0.00500094	0.988551	-0.00274376	0.9981	Color2 [DarkGray]	1	4		0.258022	0.0509775	-0.271544	-0.20827	-0.433317	0.210372	0.0301909	0.0109653
SKP1	0.431572	0.370193	-0.212456	0.863067	Color2 [DarkGray]	1	4		-0.0265656	0.0513039	0.0286138	-0.000313472	-0.781663	0.195826	0.0693336	-0.280283
NUP85	0.401525	0.396712	-0.104578	0.930077	Color2 [DarkGray]	1	4		0.00465579	0.0842686	0.00118087	0.0996308	-0.00153593	-0.0412521	-0.360924	0.175136
GSTM1	0.504542	0.312938	0.742084	1.67259	Color2 [DarkGray]	1	4		-0.403118	-1.08239	0.3123	-0.661009	-1.36689	0.698325	1.51813	0.284554
CLPX	0.258163	0.55187	-0.0692253	0.95315	Color2 [DarkGray]	1	4		0.218534	-0.0800873	0.0683784	-0.155635	-0.247327	0.080183	-0.0834139	0.0248465
MAVS	0.746612	0.179221	0.21718	1.16246	Color2 [DarkGray]	1	4		-0.159503	-0.136757	0.0445951	-0.0828318	-0.234489	0.192956	0.159017	0.416741
CDC42	0.946735	0.113049	0.259486	1.19705	Color2 [DarkGray]	1	4		-0.357231	-0.052184	-0.0327994	-0.00306868	0.464499	-0.0362998	0.15379	0.0106712
SDR16C5	0.367874	0.428673	0.169342	1.12455	Color2 [DarkGray]	1	4		-0.347391	-0.204461	0.320818	-0.0532342	-0.22662	0.273968	0.375738	-0.0299881
SPTLC1	0.0495662	0.892142	0.0251593	1.01759	Color2 [DarkGray]	1	4		-0.110264	0.345929	-0.0855451	-0.0201196	0.298352	-0.350821	0.0894261	0.193681
SNRPD2	0.34308	0.453858	-0.208142	0.865651	Color2 [DarkGray]	1	4		0.110078	-0.150724	-0.0425643	0.0260408	-0.951185	0.223962	-0.127417	-0.0350994
MAP1S	1.29191	0.0510614	-0.352933	0.782991	Color2 [DarkGray]	1	4		0.044041	0.0254732	0.203587	0.112283	-0.00330964	-0.31135	-0.62646	-0.0852263
TM9SF4	0.721957	0.189689	0.241832	1.18249	Color2 [DarkGray]	1	4		-0.0483785	-0.0855577	0.0163724	-0.0527316	0.339809	-0.258906	0.225082	0.491048
MANF	0.775638	0.167634	-0.302597	0.810792	Color2 [DarkGray]	1	4		0.0357257	-0.0201099	0.187519	-0.00679225	-0.57675	-0.282397	-0.432142	0.277244
APOL2	0.257782	0.552355	-0.392909	0.761592	Color2 [DarkGray]	1	4		-0.0624444	2.05923	-0.0121217	0.354504	-0.254529	1.27805	0.0867654	-0.342756
ITSN2	0.132274	0.737438	-0.0503533	0.9657	Color2 [DarkGray]	1	4		0.077839	-0.193213	0.0659886	-0.0479228	-0.248112	-0.289182	0.273657	-0.0350847
MKI67	0.659291	0.219133	-0.480237	0.71686	Color2 [DarkGray]	1	4		0.478623	0.416031	0.0182217	-0.0546671	-0.729645	0.678733	-0.620267	-0.391559
GJA1	0.771026	0.169424	0.912131	1.88182	Color2 [DarkGray]	1	4		-0.221351	-1.27714	-0.850511	0.187068	-0.940464	1.05967	1.14993	0.217454
DNPEP	0.811514	0.154343	-0.236515	0.848793	Color2 [DarkGray]	1	4		0.128789	0.324245	-0.0232745	-0.0124258	-0.421972	0.166038	-0.114032	-0.158759
VPS4A	1.26526	0.0542926	0.135573	1.09853	Color2 [DarkGray]	1	4		-0.154085	-0.00971388	-0.160451	0.0545326	0.0435675	0.071877	0.0365739	0.120556
MCAM	0.330996	0.466664	-0.350636	0.784238	Color2 [DarkGray]	1	4		0.190497	-0.872001	0.0483211	0.565829	-1.33893	-0.0393728	0.137508	-0.229107
UBA7	0.233377	0.584283	-0.17188	0.887685	Color2 [DarkGray]	1	4		0.0553238	0.900141	-0.313162	-0.128066	0.242362	0.050458	-0.369137	-0.0969689
UPP1	0.39425	0.403413	-0.296867	0.814018	Color2 [DarkGray]	1	4		0.0760575	0.969751	-0.292256	0.195199	-0.112801	-0.0470874	-0.519409	0.440583
GPC1	0.170133	0.675876	-0.162232	0.893641	Color2 [DarkGray]	1	4		-0.0321393	-0.274934	0.0362625	0.0456282	-1.09635	0.346623	0.401998	-0.526384
ELMO1	0.386776	0.410416	-0.224511	0.855885	Color2 [DarkGray]	1	4		0.102566	-0.00627146	0.0083657	-0.0204991	0.341688	-0.221575	-0.871516	-0.0624809
PYGM	0.434962	0.367314	0.273453	1.2087	Color2 [DarkGray]	1	4		0.0543902	-0.0402645	0.174366	-0.300333	0.904356	-0.177346	-0.173805	0.428768
RCN2	0.185671	0.652122	-0.066612	0.954878	Color2 [DarkGray]	1	4		-0.00881917	0.0231159	0.0817178	0.115739	-0.0390037	0.370881	-0.108816	-0.277755
RBBP4	0.631233	0.233758	-0.176605	0.884783	Color2 [DarkGray]	1	4		0.0238965	-0.0089936	-0.177622	0.0524132	-0.418619	0.0328934	-0.414509	-0.0164908
LDLR	0.748571	0.178414	0.172026	1.12664	Color2 [DarkGray]	1	4		0.00103995	0.173017	-0.28092	-0.0508148	0.0199938	0.0878199	0.109668	0.312944
AGK	0.0373354	0.917624	0.0211106	1.01474	Color2 [DarkGray]	1	4		-0.280317	-0.151263	0.0955649	-0.0273745	0.30596	0.0213477	-0.5511	-0.0551538
CDA	0.117637	0.762717	-0.0815152	0.945065	Color2 [DarkGray]	1	4		0.350513	0.0440455	0.0511437	-0.216256	0.620394	-0.0421747	-0.450414	-0.224421
PMPCA	0.0725257	0.846203	0.0245395	1.01715	Color2 [DarkGray]	1	4		0.0258989	-0.0110064	0.0377505	-0.0539738	0.242671	-0.31055	0.0348851	0.129821
PUM3	0.751021	0.177411	0.380483	1.30178	Color2 [DarkGray]	1	4		-0.154773	-0.270602	-0.00501219	0.0490527	0.178562	0.979095	0.0795903	-0.0966493
RAP1A	0.494157	0.320511	-0.1874	0.878187	Color2 [DarkGray]	1	4		0.0887894	0.0533099	-0.0113851	-0.0242797	0.349675	-0.378063	-0.314782	-0.299995
SERPINB8	0.0324021	0.928107	0.0201207	1.01404	Color2 [DarkGray]	1	4		-0.176298	0.233975	-0.204644	0.113931	-0.466643	0.176907	-0.0584504	0.395634
LGALS3	0.415364	0.384269	-0.287503	0.819319	Color2 [DarkGray]	1	4		0.104105	-0.179781	-0.00352548	0.0987158	-1.14313	-0.00176381	0.214896	-0.200502
COG1	0.450404	0.354483	0.109477	1.07884	Color2 [DarkGray]	1	4		-0.27486	0.00831987	-0.029896	0.0422756	0.271663	-0.0965314	-0.0506338	0.0592504
CCAR1	0.482011	0.329601	-0.134796	0.910799	Color2 [DarkGray]	1	4		0.142114	-0.273919	0.0204437	0.15287	-0.352059	0.0129612	-0.0935725	-0.0650032
TMED9	1.23011	0.0588697	0.173476	1.12777	Color2 [DarkGray]	1	4		-0.166311	0.026236	-0.016586	-0.0313627	0.257529	0.0113895	0.0308269	0.206134
FAM83A	0.0994982	0.795247	-0.0980116	0.93432	Color2 [DarkGray]	1	4		-0.403672	0.735907	-0.620724	0.671904	0.128625	0.110555	-0.0915386	-0.156273
RABGAP1	0.719041	0.190967	-0.170365	0.888618	Color2 [DarkGray]	1	4		-0.00540849	0.268916	0.0109511	0.344104	-0.0430383	0.17795	-0.0181748	-0.179634
SF1	0.61733	0.241363	0.406457	1.32543	Color2 [DarkGray]	1	4		0.035042	0.0655384	-0.0823648	-0.0344963	1.22655	-0.116837	-0.0369921	0.536829
ADD3	0.307262	0.492877	-0.142646	0.905856	Color2 [DarkGray]	1	4		0.0642208	-0.367274	0.378818	0.199053	-0.00423173	-0.34565	0.194115	-0.139999
SNCA	0.205737	0.622678	-0.203786	0.868269	Color2 [DarkGray]	1	4		0.26988	-0.202296	-0.0945782	0.0547782	0.156053	-0.912339	0.700718	-0.73179
SLC27A4	0.0428829	0.905977	0.0194422	1.01357	Color2 [DarkGray]	1	4		-0.103017	0.227632	-0.105706	0.0647021	-0.146678	-0.22603	0.351069	0.183018
NDUFS3	1.44733	0.0357005	0.216652	1.16203	Color2 [DarkGray]	1	4		-0.120672	-0.20626	0.0481772	-0.0765888	0.300671	0.0237418	0.0758919	0.110961
CDH3	0.0398272	0.912374	-0.0107781	0.992557	Color2 [DarkGray]	1	4		0.0901182	0.28964	-0.086193	-0.0806889	-0.00260178	0.0514662	-0.00455665	0.125457
TOMM40	0.291018	0.51166	0.132115	1.0959	Color2 [DarkGray]	1	4		-0.0416261	0.201047	-0.0551828	-0.0381014	0.672749	0.0273509	-0.13813	0.0326257
PI3	1.40085	0.0397329	1.45344	2.7386	Color2 [DarkGray]	1	4		-0.0747096	0.0267949	-0.549884	-0.446941	0.00629115	0.563018	2.01251	2.18719
ASNS	0.327943	0.469956	0.254325	1.19278	Color2 [DarkGray]	1	4		-0.926121	0.32661	-0.522544	0.0278031	-0.479328	0.369963	0.0398301	-0.00741643
MMP10	0.184572	0.653775	0.371373	1.29358	Color2 [DarkGray]	1	4		-0.109509	0.791765	-0.647634	0.0993276	2.03938	1.22682	-0.757652	-0.889112
TBCD	0.0392508	0.913586	-0.019881	0.986314	Color2 [DarkGray]	1	4		-0.37277	0.390841	-0.017667	-0.00999951	-0.0861734	0.125168	0.0923126	-0.220426
PPP1R21	0.847646	0.142021	-0.161232	0.894261	Color2 [DarkGray]	1	4		-0.0192348	0.147325	-0.0311859	0.214365	0.0948763	-0.254669	-0.127724	-0.0461427
TPPP3	0.676635	0.210555	0.91394	1.88418	Color2 [DarkGray]	1	4		0.964181	-1.53142	-0.915006	-0.275719	-0.182451	0.20275	1.55091	0.326584
SFXN3	0.555799	0.2781	-0.203153	0.86865	Color2 [DarkGray]	1	4		0.037438	0.107429	-0.125033	0.372002	0.0236894	0.111163	-0.0579292	-0.4977
ADPGK	0.71077	0.194639	0.402166	1.32149	Color2 [DarkGray]	1	4		-0.467684	0.394239	-0.23004	-0.367027	0.227121	0.334597	-0.284557	0.660989
PGRMC1	0.569942	0.269189	0.233716	1.17586	Color2 [DarkGray]	1	4		-0.155191	-0.162997	0.0471286	0.138541	-0.130256	0.684049	0.0247105	0.22384
IMPAD1	0.374207	0.422467	0.186043	1.13764	Color2 [DarkGray]	1	4		-0.657026	0.202006	-0.247616	0.104363	-0.0717811	0.29819	-0.122368	0.0418576
BOP1	0.314559	0.484664	-0.0549409	0.962634	Color2 [DarkGray]	1	4		0.00285587	-0.0821335	0.168626	0.0738149	-0.166812	0.0280546	0.0318933	0.0502638
GSK3B	0.101633	0.791347	-0.0425818	0.970916	Color2 [DarkGray]	1	4		-0.0218197	0.321142	-0.0723806	0.332241	0.416	-0.0544297	0.0620606	-0.0347753
NUP54	0.175749	0.667193	0.0557033	1.03937	Color2 [DarkGray]	1	4		-0.0462435	0.115728	-0.230851	0.0439131	0.196226	-0.115849	-0.168526	0.193509
LBP	0.369611	0.426962	0.522977	1.43692	Color2 [DarkGray]	1	4		-1.05887	0.356071	-0.329929	0.418671	1.87389	-0.0485912	-0.34172	-0.00572849
CPB2	0.295107	0.506866	0.639525	1.55782	Color2 [DarkGray]	1	4		0.989366	-0.154724	0.119437	-0.215018	3.17174	-0.150165	-0.736022	1.01161
HMBS	1.03916	0.0913784	0.363849	1.28685	Color2 [DarkGray]	1	4		-0.107075	0.0475849	-0.0711008	-0.268053	0.557696	-0.219934	0.313053	0.405936
LEMD2	1.16394	0.0685589	-0.183072	0.880826	Color2 [DarkGray]	1	4		0.246039	-0.0132009	0.217373	0.125963	0.0470297	-0.159273	0.0745168	-0.118387
GRB2	2.56209	0.00274099	-0.494409	0.709852	Color2 [DarkGray]	1	4		0.268676	0.17569	0.110703	0.16972	-0.592893	-0.179873	-0.280186	-0.199894
PRKACA	2.94197	0.00114296	-0.372779	0.772293	Color2 [DarkGray]	1	4		0.14826	0.124213	0.380401	0.114397	-0.184059	-0.15046	-0.187965	-0.201362
COBLL1	0.0847273	0.822759	0.0950349	1.06809	Color2 [DarkGray]	1	4		-0.259661	-0.313844	0.2712	-0.0153786	-0.963719	0.204048	0.889261	-0.0671355
NPC2	1.15394	0.070155	-0.508652	0.702879	Color2 [DarkGray]	1	4		0.716773	0.235738	0.0895612	-0.117622	-0.598744	0.100956	-0.39612	-0.216249
HGS	1.37104	0.0425558	-0.299759	0.812388	Color2 [DarkGray]	1	4		0.0632007	0.158075	0.0689416	0.256243	-0.475319	-0.0901401	0.018163	-0.105279
KLK13	0.351462	0.445183	0.356701	1.28049	Color2 [DarkGray]	1	4		0.233155	-0.507828	0.128425	-0.256797	-0.592795	-0.149505	1.2453	0.520762
GATD3B	0.256158	0.554424	-0.158907	0.895704	Color2 [DarkGray]	1	4		0.0958104	-0.331238	0.728427	0.185858	-0.199644	0.381378	0.00219695	-0.1407
ECHDC1	0.972171	0.106618	-0.310961	0.806104	Color2 [DarkGray]	1	4		0.083169	0.0889218	0.220666	-0.0852723	-0.499459	-0.382074	0.193445	-0.248273
SEPHS1	0.0770494	0.837434	0.043668	1.03073	Color2 [DarkGray]	1	4		0.126493	-0.0765909	-0.0123572	-0.0233031	0.611021	-0.250275	-0.21645	0.0446184
OGT	0.172541	0.672139	-0.0450842	0.969233	Color2 [DarkGray]	1	4		0.320091	-0.0398729	0.0105614	0.0344867	-0.0137957	-0.095518	0.0636217	0.190621
EIF2B2	0.524415	0.298941	0.11692	1.08442	Color2 [DarkGray]	1	4		-0.0949059	0.111769	-0.0823692	-0.216723	-0.162074	0.172454	0.154027	0.0210443
ATP6V0A1	0.284181	0.519779	-0.0998486	0.933131	Color2 [DarkGray]	1	4		-0.0558474	-0.0550646	0.0444135	0.208347	0.0873301	-0.455735	0.00706543	0.103793
ACSL4	0.189638	0.646193	0.146277	1.10671	Color2 [DarkGray]	1	4		-0.120775	-0.230647	0.21837	-0.172155	0.680154	0.13919	-0.700284	0.160843
PI4K2A	0.558719	0.276237	0.171606	1.12631	Color2 [DarkGray]	1	4		-0.0714955	0.148137	-0.461111	-0.126065	0.171836	0.118595	-0.139624	0.0250826
GOLPH3	0.121928	0.755218	0.0461982	1.03254	Color2 [DarkGray]	1	4		0.0736142	0.0114194	-0.0330663	-0.315747	0.244879	-0.142499	-0.258491	0.0771239
CDKN2AIP	0.0916998	0.809655	0.0350809	1.02461	Color2 [DarkGray]	1	4		0.0778253	-0.29367	-0.146612	0.205985	-0.18172	-0.000988637	0.217691	-0.0511298
NXF1	0.0905962	0.811715	0.0460153	1.03241	Color2 [DarkGray]	1	4		-0.259808	0.0342616	-0.0568607	0.236744	-0.234074	0.059709	-0.143722	0.456486
PWP2	0.964235	0.108584	0.142586	1.10388	Color2 [DarkGray]	1	4		-0.179473	-0.16155	0.00728431	-0.0277715	0.18495	0.119617	-0.0409716	-0.0547609
CFL2	0.533747	0.292586	-0.266478	0.831346	Color2 [DarkGray]	1	4		0.194391	-0.12417	0.0512194	-0.0852101	-0.480674	0.205651	-0.754596	-6.4151e-05
SOD2	0.109477	0.777182	0.108873	1.07839	Color2 [DarkGray]	1	4		-0.639291	-0.301825	0.862641	-0.105056	0.450616	0.0898348	-0.408465	0.119975
KRT23	0.479302	0.331663	0.435873	1.35273	Color2 [DarkGray]	1	4		-0.559647	-0.266232	-0.391657	0.199694	0.504613	-0.924109	0.355993	0.789153
HTATIP2	1.04898	0.0893351	0.399708	1.31924	Color2 [DarkGray]	1	4		-0.113883	-0.133012	-0.483368	0.0960009	0.60496	-0.159489	0.23457	0.28453
STT3B	0.299744	0.501483	0.139015	1.10115	Color2 [DarkGray]	1	4		-0.310354	0.0238619	-0.045932	0.152754	0.334581	-0.129435	-0.254557	0.425801
LRG1	0.112045	0.7726	0.0972867	1.06976	Color2 [DarkGray]	1	4		-0.797364	0.422053	-0.368131	0.264996	0.304204	-0.390121	-0.1383	0.134919
ACP1	0.210287	0.616188	0.071899	1.0511	Color2 [DarkGray]	1	4		-0.385304	0.252807	-0.0404369	0.0385572	0.0649789	-0.0368482	0.019721	0.105367
NMI	0.10926	0.777571	-0.124975	0.91702	Color2 [DarkGray]	1	4		-0.13386	0.927114	-0.506615	0.119484	0.21526	0.641529	-0.731971	-0.218596
DDI2	0.510331	0.308794	0.229383	1.17233	Color2 [DarkGray]	1	4		-0.0115332	-0.272448	0.0606371	0.0114882	-0.0957699	-0.0802266	0.727281	0.15439
ZFR	0.344302	0.452582	-0.143119	0.905559	Color2 [DarkGray]	1	4		0.0614389	-0.388919	0.141681	0.0188369	-0.578692	-0.0304776	-0.115441	-0.0148289
PIK3R4	0.472226	0.337112	-0.149623	0.901486	Color2 [DarkGray]	1	4		-0.273381	0.119897	0.0189061	0.162678	0.00524761	-0.373154	-0.263649	0.0611615
NAA50	0.0355283	0.92145	0.0202118	1.01411	Color2 [DarkGray]	1	4		0.0985184	-0.156267	-0.000979602	-0.145781	-0.537724	0.30568	0.184695	-0.0763136
PTK2B	0.318054	0.48078	0.196263	1.14573	Color2 [DarkGray]	1	4		0.0573945	0.331851	-0.129597	-0.0653206	0.91217	-0.0271867	-0.171862	0.266258
DDX23	0.802268	0.157664	-0.3075	0.80804	Color2 [DarkGray]	1	4		-0.0515649	-0.0914435	0.464178	0.160419	-0.491497	0.0969146	-0.361087	0.00725522
SCRN1	1.05269	0.088574	-0.287169	0.819509	Color2 [DarkGray]	1	4		0.356232	0.351357	-0.159852	0.323768	0.121648	-0.133745	-0.11668	-0.148395
CDK5RAP3	0.0265798	0.940633	-0.0078476	0.994575	Color2 [DarkGray]	1	4		-0.0206406	-0.211443	0.125022	-0.0269139	-0.245141	0.0300462	0.096192	-0.0464633
PTPN23	1.14721	0.0712508	-0.37732	0.769866	Color2 [DarkGray]	1	4		0.173359	0.434694	0.241562	-0.0218189	-0.581795	-0.0691168	0.0911243	-0.121697
MCCC2	1.00145	0.0996657	0.398663	1.31829	Color2 [DarkGray]	1	4		-0.260551	-0.220603	0.298908	-0.387499	0.474392	0.179198	-0.101955	0.473273
SF1	0.0207726	0.953295	-0.0191326	0.986826	Color2 [DarkGray]	1	4		0.104412	-0.473704	-0.103486	0.128031	-0.893099	0.398391	-0.0875095	0.160941
P3H1	0.114329	0.768548	-0.0713482	0.951748	Color2 [DarkGray]	1	4		-0.0609607	-0.367648	0.0625586	0.190193	0.173044	0.278749	-0.485962	-0.427081
RBM28	0.0213147	0.952106	0.00763586	1.00531	Color2 [DarkGray]	1	4		0.0978262	-0.172156	-0.096104	0.0892512	-0.0738732	0.192825	-0.268252	0.0986615
ARHGAP45	0.247852	0.56513	-0.172687	0.887189	Color2 [DarkGray]	1	4		-0.0519441	0.11191	0.0544397	-0.0936227	0.399716	-0.518703	-0.760787	0.209808
ARFGAP2	0.0751897	0.841028	0.0271063	1.01897	Color2 [DarkGray]	1	4		-0.296976	0.120249	0.00786787	-0.0438961	-0.292902	-0.020034	0.139147	0.0694589
GIMAP4	0.823198	0.150246	-0.558071	0.67921	Color2 [DarkGray]	1	4		-0.500312	0.812874	0.750649	0.256806	-0.598355	0.133904	-0.250221	-0.197597
TCEA1	0.122172	0.754794	-0.0881056	0.940757	Color2 [DarkGray]	1	4		0.0185513	-0.00364823	-0.225539	0.163587	-0.663665	0.255383	-0.400589	0.4094
AKAP12	0.068497	0.854089	0.0552696	1.03905	Color2 [DarkGray]	1	4		0.114515	-0.778208	0.572616	-0.101048	0.0781951	-0.0291324	0.131385	-0.151495
FAM98A	0.0667292	0.857572	0.0199948	1.01396	Color2 [DarkGray]	1	4		-0.0826837	-0.1062	0.195404	0.0729539	-0.111123	0.196559	-0.08402	0.158037
SDHB	0.0442056	0.903222	0.0205173	1.01432	Color2 [DarkGray]	1	4		0.0271347	-0.0902263	-0.0151558	-0.0788541	0.374244	0.015421	-0.4027	-0.0619968
CSNK2A2	0.2737	0.532476	0.110586	1.07967	Color2 [DarkGray]	1	4		-0.187748	0.236973	-0.309776	-0.014386	0.370003	0.0387702	-0.173229	-0.068136
PURA	0.196814	0.635604	-0.111516	0.925615	Color2 [DarkGray]	1	4		-0.263887	-0.146705	0.280853	0.0742895	-0.653676	0.0633241	0.206247	-0.11741
PES1	2.75164	0.00177158	0.33296	1.2596	Color2 [DarkGray]	1	4		-0.292565	-0.287944	-0.263452	-0.0554288	0.123531	0.0440647	0.167631	0.0972267
NDUFA10	0.39893	0.399089	0.171243	1.12603	Color2 [DarkGray]	1	4		0.121799	-0.61058	0.16459	-0.277044	0.141442	-0.0831487	0.0302036	-0.00475955
NAV1	0.0838543	0.824415	0.033389	1.02341	Color2 [DarkGray]	1	4		0.00245657	0.256591	-0.251568	-0.134427	0.174251	-0.243597	0.119469	-0.0435137
STRN3	0	1	NaN	#VALUE!	Color2 [DarkGray]	1	4		NaN	NaN	NaN	NaN	NaN	NaN	NaN	NaN
ADSL	0.106303	0.782883	0.0287828	1.02015	Color2 [DarkGray]	1	4		-0.0301803	0.0536399	0.05585	-0.276318	0.0940353	-0.194533	0.0310237	-0.0124026
CASP4	0.112169	0.772379	-0.0664056	0.955014	Color2 [DarkGray]	1	4		-0.0540994	0.357916	-0.391114	0.0451972	-0.50824	0.173825	0.129382	-0.10269
HNRNPCL3	0.210501	0.615884	-0.107743	0.928039	Color2 [DarkGray]	1	4		-0.262788	0.00846162	-0.00266044	-0.0331036	-0.751309	0.0345975	-0.083323	0.0789708
OASL	0.393934	0.403707	-0.44353	0.735333	Color2 [DarkGray]	1	4		-0.392533	1.13798	-0.307	0.121697	-0.0962342	0.134544	-1.33454	0.0822579
PIP	0.248331	0.564506	0.731728	1.66063	Color2 [DarkGray]	1	4		-0.0910867	0.691594	-0.26437	0.083658	4.34791	0.126031	-0.656189	-0.471046
CHD3	0.449402	0.355302	-0.199747	0.870703	Color2 [DarkGray]	1	4		0.459495	-0.136448	-0.0544573	0.420825	0.0783926	-0.310947	-0.137356	0.260339
NOC3L	0.449159	0.355501	-0.14853	0.902169	Color2 [DarkGray]	1	4		0.253622	-0.127038	0.223948	-0.0277581	-0.213159	0.252129	-0.255542	-0.0547742
IST1	0.228057	0.591484	0.070702	1.05023	Color2 [DarkGray]	1	4		-0.221779	0.0122656	-0.00876527	0.0514672	0.0337144	-0.197197	-0.0418898	0.321369
PRKAG1	1.80749	0.0155779	0.301809	1.23269	Color2 [DarkGray]	1	4		-0.288483	-0.00211797	-0.108671	-0.0246646	0.0256627	0.291856	0.177024	0.288758
[truncated: 5,455 more rows]

## Sheet: S3
S3: List of quantified proteins in NACT resistant and sensitive tongue cancer patients
Gene Symbol	log p value	p value	Difference	fold change	DC76	DC97	DC148	DC160	DC14	DC22	DC55	DC152
POLR2I	3.24144	0.00057354	0.396637	1.31644	-0.141295	-0.252333	-0.107696	-0.216807	0.264963	0.0969215	0.325551	0.18098
SLC2A1	3.13545	0.000732061	1.4606	2.75222	-1.33307	-0.680369	-0.80291	-0.43608	0.697922	0.792074	0.839695	0.260257
CHMP7	2.99296	0.00101635	-0.354921	0.781912	0.109049	0.126015	0.167399	0.0442492	-0.389742	-0.219899	-0.233545	-0.129788
MFSD1	2.97373	0.00106234	-0.33345	0.793637	0.294066	0.0465592	0.259834	0.155955	-0.151241	-0.155522	-0.153785	-0.116836
PRKACA	2.94197	0.00114296	-0.372779	0.772293	0.14826	0.124213	0.380401	0.114397	-0.184059	-0.15046	-0.187965	-0.201362
NIFK	2.91551	0.00121477	0.358693	1.28226	-0.224765	-0.0423061	-0.177844	-0.109126	0.349855	0.177755	0.124962	0.228157
COMMD5	2.9028	0.00125084	-0.238926	0.847376	0.141972	0.0784196	0.110721	0.0615784	-0.046897	-0.196596	-0.111967	-0.207553
SNX8	2.86987	0.00134935	-0.429544	0.742497	0.243572	0.400221	0.327076	0.05511	-0.191439	-0.212747	-0.14622	-0.141789
PES1	2.75164	0.00177158	0.33296	1.2596	-0.292565	-0.287944	-0.263452	-0.0554288	0.123531	0.0440647	0.167631	0.0972267
KRT1	2.71865	0.00191138	2.41142	5.31999	-0.52498	-0.633782	-0.973506	-0.923068	0.435371	1.5515	2.14449	2.459
DNAJC3	2.70723	0.00196231	-0.177593	0.884177	0.0764761	0.118226	0.0909539	0.0452479	-0.0378483	-0.0475399	-0.138549	-0.155532
DOCK10	2.63209	0.00233295	-0.544443	0.685656	0.173499	0.236362	0.248759	0.120364	-0.63815	-0.146159	-0.29008	-0.324397
BAX	2.62983	0.00234515	-0.561444	0.677623	0.121247	0.299396	0.345937	0.141942	-0.483524	-0.0975676	-0.258359	-0.497806
RMDN3	2.56665	0.00271239	-0.371991	0.772715	0.203137	0.01174	0.179527	0.199302	-0.37249	-0.196211	-0.245323	-0.0802358
POGZ	2.56421	0.00272764	-0.259872	0.835162	0.237029	0.051316	0.211892	0.118389	-0.182985	-0.0500212	-0.0590577	-0.1288
GRB2	2.56209	0.00274099	-0.494409	0.709852	0.268676	0.17569	0.110703	0.16972	-0.592893	-0.179873	-0.280186	-0.199894
OPLAH	2.52253	0.00300241	0.30497	1.23539	-0.227475	-0.270802	-0.00110481	-0.232134	0.121672	0.143911	0.0756166	0.147165
KLC1	2.48442	0.00327781	-0.436037	0.739162	0.256105	0.439541	0.11794	0.133633	-0.346145	-0.15664	-0.0855154	-0.208631
CD2	2.48441	0.00327785	-0.930508	0.524674	0.262086	0.472553	0.0853457	0.311146	-0.842263	-0.582928	-0.995682	-0.170027
GPRIN3	2.47138	0.00337766	-1.01894	0.49348	0.183098	0.267942	0.651692	0.638732	-0.961375	-0.172455	-0.40601	-0.794447
ASL	2.42972	0.00371772	-0.400871	0.757401	0.304911	0.299113	0.0648293	0.194039	-0.0445479	-0.354569	-0.124045	-0.217431
RAVER1	2.4206	0.00379667	0.482768	1.39742	-0.407187	-0.35814	-0.0573403	-0.494824	0.14667	0.0509468	0.141072	0.274891
CDK11B	2.41621	0.00383522	-0.227323	0.854218	0.0938611	0.00279064	0.013645	0.129594	-0.142804	-0.203219	-0.252262	-0.0711163
PACSIN2	2.40084	0.00397335	-0.419698	0.747581	0.248286	0.145935	0.0580481	0.17587	-0.473399	-0.0671567	-0.28363	-0.226465
RBM17	2.37254	0.00424088	-0.294976	0.815086	0.198477	0.0150165	0.0581903	0.141935	-0.307096	-0.129216	-0.246369	-0.0836037
BAG2	2.37099	0.00425608	-0.969703	0.510611	0.172502	0.483037	0.292229	0.763433	-0.523042	-0.378728	-1.03477	-0.231072
COTL1	2.36581	0.00430711	-0.804617	0.572514	0.226029	0.476303	0.317081	0.310932	-0.28501	-0.311798	-0.99049	-0.300824
SRGN	2.32604	0.00472019	-0.909276	0.532452	0.699917	0.0984366	0.949819	0.653575	-0.138736	-0.319975	-0.601745	-0.174903
MTMR6	2.29548	0.00506436	-0.555062	0.680628	0.0988786	0.321406	0.591858	0.560343	-0.04199	-0.0896923	-0.291342	-0.224739
OTUB1	2.24756	0.00565505	-0.506372	0.70399	0.164359	0.0354484	0.117139	0.454893	-0.419143	-0.280716	-0.448831	-0.104959
PHLPP1	2.22668	0.0059336	0.483308	1.39795	-0.295102	-0.0279322	-0.141613	-0.336781	0.472045	0.0313011	0.318489	0.309972
CNPY3	2.2191	0.00603808	-0.392076	0.762032	0.0866913	0.0393406	0.121059	0.317046	-0.291208	-0.0371406	-0.347488	-0.328328
TRAPPC13	2.19393	0.00639832	0.318508	1.24704	-0.340495	-0.0100399	-0.0701345	-0.186509	0.196896	0.157692	0.0935644	0.218701
GIMAP6	2.19171	0.00643117	-0.680251	0.624057	0.119664	0.644754	0.270812	0.22527	-0.550093	-0.0957424	-0.227402	-0.587267
CSF2RA	2.18221	0.0065734	0.553253	1.46739	-0.516193	-0.0539682	-0.127948	-0.419982	0.366745	0.056131	0.271412	0.40063
SETD2	2.16716	0.00680518	-0.825733	0.564196	0.755105	0.660366	0.502451	0.0535015	-0.722367	-0.274492	-0.194648	-0.139999
COPS9	2.16279	0.00687396	0.547158	1.4612	-0.529143	-0.401001	-0.346757	-0.054196	0.394304	0.189398	0.302902	-0.0290691
IL18	2.13296	0.00736276	0.795208	1.73533	-0.0688611	-0.57265	-0.215489	-0.176665	0.124883	0.872701	0.737192	0.41239
FBXW2	2.13156	0.00738644	0.669746	1.59079	-0.47632	-0.333218	-0.0191688	-0.19494	0.614369	0.0139627	0.575233	0.451775
MIEN1	2.13099	0.00739626	-0.423873	0.745421	0.352399	0.184631	0.0916828	0.162875	-0.466122	-0.175584	-0.0255823	-0.236617
AGO2	2.10824	0.00779408	0.168561	1.12394	-0.018117	0.00264696	-0.157319	-0.029473	0.109415	0.162083	0.056625	0.143858
HNRNPH3	2.09835	0.00797347	-0.454636	0.729694	0.156602	0.0322778	0.172239	0.393347	-0.394733	-0.0296469	-0.412298	-0.227403
AMMECR1	2.09631	0.00801105	0.871351	1.82938	-0.473343	-0.254449	-0.292124	-0.00458701	0.0240436	0.854546	0.692438	0.889875
NELFB	2.07863	0.00834389	-0.387439	0.764486	0.342686	0.132189	0.0456742	0.12369	-0.425631	-0.08357	-0.27081	-0.125505
ALG13	2.06685	0.00857325	0.345663	1.27073	-0.257753	-0.00298139	-0.0964558	-0.147828	0.0368358	0.200958	0.38916	0.250679
IGF2R	2.06644	0.00858142	-0.274075	0.82698	0.252721	0.180521	0.0174327	0.148591	-0.26954	-0.024662	-0.107496	-0.0953384
DDX50	2.06596	0.00859099	-0.423143	0.745798	0.47973	0.408207	-0.00105894	0.399562	-0.126441	-0.13337	-0.070089	-0.0762327
RNMT	2.05727	0.00876463	0.493731	1.40808	-0.145179	-0.158955	-0.174205	-0.0920317	0.526434	0.106637	0.157958	0.613522
ATP6AP2	2.05406	0.00882957	0.422593	1.34033	-0.152637	-0.0814363	-0.28151	-0.249123	0.507583	0.0814025	0.256657	0.0800221
RANBP6	2.04766	0.00896072	0.645816	1.56462	-0.186368	-0.305988	-0.167385	-0.0596884	0.0782862	0.841815	0.361631	0.582104
SIPA1	2.0476	0.00896192	-0.516096	0.699262	0.495359	0.0892339	0.202797	0.0310412	-0.302823	-0.283752	-0.54393	-0.115447
TRMT10C	2.04373	0.00904217	0.320385	1.24866	-0.170291	-0.0604662	-0.0501217	-0.0735555	0.411753	0.0440996	0.169279	0.301974
ARHGAP18	2.00742	0.00983052	-0.410129	0.752556	0.059119	0.427145	0.227915	0.0742413	-0.308516	-0.0290033	-0.330804	-0.183774
ADA	2.00318	0.00992715	-0.725531	0.604774	0.195081	0.800763	0.168148	0.176061	-0.322837	-0.187814	-0.733317	-0.318103
GAK	1.99767	0.0100538	-0.239126	0.847258	0.101157	0.188234	-0.0148454	0.12491	-0.184019	-0.255372	-0.0553521	-0.0623071
ZNF638	1.99021	0.0102281	-0.27886	0.824242	0.311643	0.165314	0.061943	0.0565995	-0.168663	-0.170944	0.00835305	-0.188686
PUM2	1.98812	0.0102773	0.259026	1.19667	-0.209002	-0.0544294	-0.082091	-0.0547328	0.214812	0.0434012	0.300011	0.0776238
S100A6	1.98401	0.010375	-0.990989	0.503133	0.470511	0.759401	0.720197	0.0948659	-0.0852649	-0.361601	-0.354824	-1.11729
CTSZ	1.97989	0.0104739	-0.75946	0.590717	0.534491	0.0914762	0.397853	0.390478	-0.0647216	-0.113912	-0.783688	-0.66122
CTSL	1.96882	0.0107443	-0.510778	0.701844	0.27209	0.277826	0.134235	-0.00698001	-0.377303	-0.00368608	-0.39312	-0.591831
GIT2	1.9637	0.0108718	-0.151838	0.900103	0.0766967	0.116562	0.137079	-0.0286075	-0.0394101	-0.084304	-0.127974	-0.0539338
CD3D	1.96036	0.0109556	-0.690457	0.619658	0.127915	0.968328	0.318308	0.383164	-0.18562	-0.105307	-0.334493	-0.338692
ZNF385A	1.95117	0.0111899	0.569134	1.48363	-0.606596	-0.339021	-0.333807	0.0409794	0.425336	0.275493	0.0255901	0.311675
EVL	1.94634	0.0113152	-1.18914	0.438564	0.107818	0.825881	0.739213	0.43383	-1.43691	-0.0822149	-0.692813	-0.437885
IKZF1	1.9408	0.0114604	-0.445439	0.734361	0.384015	0.0383393	0.56742	0.118088	-0.206305	-0.202925	-0.156632	-0.108031
CRIPT	1.93121	0.0117163	0.520331	1.43428	-0.224461	-0.515911	-0.0460057	-0.0722885	0.381063	0.040165	0.299644	0.501784
DYM	1.92646	0.0118452	0.23456	1.17655	-0.172811	-0.0389069	-0.00978764	-0.0258872	0.278761	0.159272	0.0279959	0.224818
DHX8	1.92262	0.0119503	-0.330934	0.795021	0.209516	0.115504	0.00586762	0.0915124	0.0187992	-0.259973	-0.331422	-0.328742
MARK1	1.9178	0.0120836	-0.658536	0.633521	0.321538	0.166668	0.0550053	0.180509	-0.824252	-0.0637874	-0.306712	-0.715672
ZMIZ1	1.905	0.0124452	-0.245423	0.843568	0.261253	0.111074	0.0200976	0.0346235	-0.228683	-0.0261756	-0.133093	-0.166694
GPRC5A	1.88861	0.0129238	-0.584291	0.666977	0.338242	0.0241696	0.366715	0.201199	-0.487685	-0.122209	-0.703851	-0.0930941
STXBP3	1.87524	0.0133277	0.350879	1.27534	-0.219392	-0.0214435	-0.297667	-0.217954	0.319878	0.111918	0.262244	-0.0469828
PURB	1.87257	0.0134099	0.472323	1.38734	-0.165861	-0.31085	-0.359776	-0.0852963	0.243883	0.0719724	0.582506	0.0691455
ULBP2	1.85658	0.0139131	-0.705456	0.613249	0.267056	0.0531656	0.66133	0.708292	-0.395273	-0.0520304	-0.083179	-0.601495
COX8A	1.83963	0.0144668	-0.440411	0.736924	0.397721	0.129486	0.289394	-0.0446924	-0.45267	-0.291323	-0.207542	-0.0382025
CDS2	1.8396	0.0144677	-0.448235	0.732939	0.00137486	0.503505	0.504199	0.250779	-0.200331	-0.0413983	-0.248896	-0.0424603
KRT10	1.83813	0.0145167	1.96093	3.89312	-0.740231	-0.754462	-1.00418	-0.182813	0.564337	0.155846	2.42963	2.01221
HSPB7	1.83549	0.0146054	0.500158	1.41437	0.0692737	-0.451509	-0.253943	-0.49942	0.383099	0.193407	0.0400527	0.248475
BCCIP	1.83308	0.0146864	-0.253496	0.838861	0.0837325	0.17758	-0.0213711	0.144754	-0.164007	0.0161496	-0.248435	-0.232996
TMUB1	1.83266	0.0147009	-0.213756	0.862289	0.201949	0.0986687	0.0244857	0.0473762	-0.064015	-0.0308008	-0.134402	-0.253327
RAMAC	1.83116	0.0147518	0.395946	1.31581	0.0185002	-0.28925	-0.0326595	-0.0272062	0.0428076	0.34521	0.393959	0.471192
ARHGDIA	1.83034	0.0147794	-0.488915	0.712561	0.333134	0.549295	0.091201	0.132806	-0.483964	-0.104865	-0.0326995	-0.227693
DKC1	1.82453	0.0149786	0.240803	1.18165	-0.167108	-0.223343	-0.0198787	-0.198545	0.0663408	0.184866	0.16042	-0.0572892
ING1	1.82021	0.0151284	-0.552047	0.682052	0.456349	-0.0129217	0.332346	0.352274	-0.592799	-0.0711575	-0.360807	-0.0553773
PRKAG1	1.80749	0.0155779	0.301809	1.23269	-0.288483	-0.00211797	-0.108671	-0.0246646	0.0256627	0.291856	0.177024	0.288758
FAF2	1.80446	0.0156869	-0.36798	0.774867	0.32195	0.0258722	0.0633072	0.129565	-0.228412	-0.0229152	-0.456	-0.223896
PRPS2	1.78734	0.0163176	0.427116	1.34454	-0.319557	-0.17215	-0.0590433	-0.326307	0.517303	0.154651	0.178857	-0.0194049
PRPF6	1.78185	0.0165254	-0.204867	0.867619	0.0742937	0.122683	-0.0124653	-0.0231946	-0.230806	-0.121435	-0.265056	-0.0408537
CDC42EP1	1.77876	0.0166432	-0.391258	0.762464	0.0809416	0.108012	0.147974	0.26477	-0.557293	-0.231517	-0.0501821	-0.124342
SRPRB	1.77762	0.0166871	0.525144	1.43908	-0.62758	-0.0115838	-0.125747	-0.256141	0.302352	0.1831	0.0950985	0.498974
CHD6	1.77605	0.0167476	-0.393473	0.761295	0.206482	0.0370125	0.46608	0.465973	-0.23319	-0.088529	0.0451827	-0.121806
NECAP2	1.7735	0.0168461	-0.504412	0.704947	0.190268	0.0901664	0.0552334	0.208152	-0.676074	-0.0640397	-0.16697	-0.566747
DENND4C	1.76547	0.0171607	0.129449	1.09388	-0.0697769	-0.0151134	-0.00929121	-0.0698141	0.180039	0.0857968	0.0839172	0.00404846
SORBS2	1.76054	0.0173565	-0.620528	0.650433	0.711358	0.301975	0.47374	0.0115622	-0.431099	-0.022829	-0.0514311	-0.478115
NEO1	1.75631	0.0175262	0.487801	1.40231	-0.667919	-0.178207	-0.0628187	-0.139105	0.215258	0.151477	0.135944	0.400476
ERMP1	1.75255	0.0176786	0.585206	1.50025	-0.108413	-0.287539	-0.127107	-0.0182474	0.64494	0.62422	0.594611	-0.064252
PRRC1	1.74974	0.0177935	0.404607	1.32373	-0.335441	-0.33767	0.0734754	-0.458236	0.0783722	0.249287	0.0505258	0.18237
NBR1	1.74703	0.0179049	-0.590429	0.664145	0.552568	-0.0853963	0.316082	0.308731	-0.327313	-0.354233	-0.601198	0.0130132
ARFRP1	1.73409	0.0184465	0.235912	1.17765	-0.12911	-0.00241924	-0.135786	-0.343392	0.0362707	0.131951	0.0994173	0.0653009
ARSB	1.73097	0.0185792	-0.361015	0.778617	0.225852	-0.00793833	0.460241	0.267037	-0.0670383	0.0116258	-0.198776	-0.244681
CD33	1.7254	0.0188192	-0.397524	0.75916	0.239955	0.193296	0.0599547	0.089321	-0.0391033	-0.585525	-0.210087	-0.172855
SMARCA4	1.72389	0.0188848	-0.339531	0.790298	0.371929	-0.0272167	0.146715	0.173754	-0.224288	-0.341478	-0.0858242	-0.0413514
PRH1	1.72208	0.0189635	-0.964547	0.512439	0.208841	1.02327	0.266707	0.25668	-1.15923	-0.205814	-0.155991	-0.581655
TRAP1	1.72017	0.0190472	0.421499	1.33932	-0.425909	-0.36974	0.026541	-0.188668	0.108189	0.145142	0.0468679	0.428021
CALR	1.71709	0.0191829	-0.346337	0.786579	0.319567	0.358493	0.0106884	0.0255453	-0.156549	-0.0163547	-0.285193	-0.212955
KHNYN	1.71707	0.0191836	-0.326001	0.797745	0.208249	0.0817771	0.059606	0.237842	-0.446348	-0.106493	-0.0228431	-0.140846
COG7	1.7085	0.0195658	0.227586	1.17087	-0.0550422	-0.0211971	-0.121751	-0.152904	0.054906	0.0538328	0.330494	0.120217
CCDC30	1.69558	0.0201566	-0.797655	0.575283	1.05952	0.0304233	0.257047	0.38096	-0.63187	-0.0276916	-0.392471	-0.410637
RGL2	1.69435	0.0202137	0.337459	1.26353	-0.140963	0.0139442	-0.0747283	-0.247877	0.418749	0.0645594	0.0693027	0.347602
AIF1	1.69319	0.0202681	-0.710732	0.61101	0.0456079	0.402537	0.607801	-0.0453483	-0.634101	0.0445756	-0.638821	-0.603984
BAG5	1.69291	0.0202809	0.293267	1.22541	-0.224366	-0.161354	-0.0506566	-0.0763199	0.385858	0.148862	0.153	-0.0273486
SLC22A18	1.69278	0.0202871	0.337468	1.26354	-0.00612784	0.00271735	-0.197532	-0.248613	0.255812	0.000915689	0.224027	0.41956
GALM	1.6905	0.020394	-0.652245	0.63629	0.0464271	0.739762	0.458266	0.303974	0.0144358	-0.211825	-0.689622	-0.173538
HK1	1.67826	0.0209769	-0.23652	0.84879	0.110535	0.0391518	0.205544	0.199061	-0.00676677	-0.0412899	-0.0527973	-0.290933
WDR77	1.66695	0.0215303	0.374184	1.29611	-0.410222	-0.0627401	0.0112641	-0.279028	0.298237	-0.016952	0.284807	0.189919
HCLS1	1.66369	0.0216927	-0.86009	0.550918	0.70459	0.0791434	0.0412133	0.229454	-0.767687	-0.327397	-1.17022	-0.120658
NAXD	1.65555	0.0221031	0.632684	1.55045	-0.692516	-0.363824	-0.0101376	-0.623164	0.609936	0.00492525	0.158518	0.067717
GIMAP1	1.65369	0.0221977	-0.362481	0.777826	-0.0363059	0.411581	0.282525	0.258724	-0.161125	0.00619902	-0.320231	-0.0582446
DEK	1.65246	0.0222607	-0.420482	0.747175	0.112295	0.0440797	0.138714	0.120623	-0.626822	-0.0422113	-0.455844	-0.141341
STX4	1.65182	0.0222934	0.174265	1.12839	-0.19903	-0.00517986	-0.127542	-0.135248	0.0821094	0.00886832	0.159102	-0.0200207
WDR1	1.64489	0.0226524	-0.190242	0.876459	0.119757	0.240627	0.00963285	0.104277	-0.165378	-0.0152612	0.00700553	-0.113038
ARL6IP1	1.63575	0.0231338	-0.316355	0.803097	0.392319	0.0821783	-0.00860298	0.144797	-0.166654	0.00337825	-0.222667	-0.268785
TLN1	1.63531	0.0231576	-0.396187	0.759864	0.529552	0.0120195	0.217518	0.160545	0.0216073	-0.126875	-0.263746	-0.296099
KAT6A	1.63247	0.0233095	0.528456	1.44239	-0.327026	-0.0281357	-0.408248	-0.224615	0.0701971	0.0314986	0.702401	0.321704
GZMH	1.63026	0.0234282	-0.916533	0.529781	0.129378	1.18398	0.191745	0.316629	-0.0768427	-0.327784	-0.518947	-0.920821
KANK4	1.63016	0.0234336	-1.54748	0.342106	2.11222	1.01891	-0.0151558	1.95388	0.0401333	-0.209049	-0.278582	-0.672585
IL16	1.62997	0.0234436	-0.456083	0.728963	0.156775	-0.0378458	0.570273	0.322622	-0.114721	-0.373875	-0.292814	-0.0310989
MYO18A	1.6291	0.0234907	-0.247491	0.84236	0.150944	0.22225	0.0277368	0.0663553	-0.293611	-0.164529	0.0416653	-0.106204
AGTRAP	1.62709	0.0235999	-0.4215	0.746648	0.561545	0.327643	0.00903753	0.0905925	-0.163942	-0.0146451	-0.19519	-0.323406
DHRS1	1.61951	0.0240155	-0.86517	0.548982	0.580343	1.20379	0.501141	-0.00243647	-0.637384	-0.383975	0.0715139	-0.227999
SHC1	1.61392	0.0243264	0.207472	1.15466	0.010453	-0.0778944	-0.161234	-0.00985188	-0.00920155	0.144098	0.260918	0.195547
POLB	1.6129	0.0243837	-0.2392	0.847215	0.221899	0.124212	0.0648727	-0.00655986	-0.146521	-0.312405	-0.017379	-0.0760719
HERC4	1.61033	0.0245287	0.335753	1.26204	-0.370073	-0.0446433	-0.111045	-0.350972	0.0811962	0.0765587	0.333142	-0.0246192
RNF20	1.61008	0.0245425	-0.44416	0.735012	0.372953	0.0292689	0.108732	0.384005	-0.574255	-0.111526	-0.0974644	-0.0984348
VPS26C	1.60877	0.0246169	-0.201398	0.869707	0.23942	0.287744	0.0260599	0.103391	-0.0124616	-0.032467	0.0187277	-0.122777
GTF2E2	1.60829	0.0246438	-0.596069	0.661554	0.87391	0.0607119	0.117151	0.54726	-0.163996	-0.0602846	-0.330836	-0.230125
TBC1D10C	1.60633	0.0247555	0.455439	1.3712	-0.391813	0.0597262	-0.375973	-0.245964	0.0091064	0.0403345	0.434876	0.383415
ISCA1	1.60464	0.0248521	-0.618337	0.651422	0.727372	-0.0749267	0.357458	0.562622	-0.408689	-0.0357156	-0.438695	-0.0177223
FRMD6	1.60354	0.0249151	0.43294	1.34998	-0.603722	-0.0472229	-0.221228	-0.115119	0.1455	0.0497819	0.144873	0.404312
ISCA2	1.60311	0.0249399	0.273715	1.20892	-0.287881	-0.0807904	0.0344512	-0.0718728	0.301731	0.130354	0.0165824	0.2401
CORO1C	1.59874	0.0251919	-0.396695	0.759596	0.125445	0.326562	-0.0570835	0.198808	-0.458593	0.0507044	-0.27606	-0.309102
BLOC1S4	1.59277	0.0255407	0.418312	1.33636	-0.0395597	-0.261305	-0.0933119	-0.239668	0.292059	0.0682457	0.617871	0.0612268
C7orf43	1.59018	0.0256931	-0.419249	0.747814	0.601466	0.189871	0.124892	0.0140997	-0.220102	-0.025488	-0.178842	-0.322233
SERPINB6	1.58281	0.0261331	-0.590917	0.663921	0.0909546	0.466206	0.618586	0.240874	-0.0331888	-0.228439	0.0164836	-0.701903
PI4K2B	1.58223	0.0261679	0.359086	1.28261	-0.333996	-0.0430635	-0.130345	-0.191073	0.469372	0.045838	0.220373	0.00228401
VTI1A	1.58219	0.0261702	-0.363542	0.777254	0.485443	0.200095	0.00623652	0.182567	-0.266662	-0.0117534	-0.02082	-0.280591
SOAT1	1.57445	0.0266408	-1.10937	0.463497	0.772998	1.08712	-0.111214	0.282928	-0.922275	0.10002	-1.12735	-0.456029
CACNG6	1.57117	0.0268429	0.385574	1.30638	-0.293144	-0.0406727	0.0184444	-0.122851	0.553117	0.166659	0.0304617	0.353835
PRKACB	1.56947	0.0269482	-0.366583	0.775617	0.472791	0.130523	0.0399273	0.0905323	-0.0171367	-0.0867925	-0.273656	-0.354974
INTS9	1.56323	0.0273381	-0.233465	0.85059	0.0254416	0.088704	0.0269082	0.110003	-0.103358	0.00568622	-0.351072	-0.234058
TBCB	1.55703	0.027731	-0.464236	0.724855	0.0705037	0.43017	0.0156153	0.24709	-0.639515	-0.0214807	-0.206027	-0.226541
ADH5	1.55132	0.028098	-0.26141	0.834272	-0.0352929	0.18798	0.259087	0.0542464	-0.310276	-0.130029	-0.131662	-0.00765181
STX10	1.54894	0.0282528	-0.335623	0.792442	0.335788	0.0941104	0.0247586	0.117149	-0.46946	-0.0310893	-0.13656	-0.133577
EPS15	1.54336	0.028618	-0.306839	0.808411	0.149132	0.141508	-0.0180673	0.176321	-0.472156	-0.0570149	-0.190198	-0.0590909
RNF149	1.54176	0.0287234	0.354209	1.27828	-0.333559	-0.322354	-0.192308	0.0962947	0.305269	0.177381	-0.0372825	0.219542
WDR26	1.5391	0.0289001	0.429894	1.34713	-0.5793	-0.184609	-0.0684684	-0.110481	0.279489	0.0613735	0.419497	0.0163588
TENM2	1.53744	0.0290106	0.402094	1.32142	-0.038448	-0.0361855	-0.443322	-0.210974	0.522012	0.171057	0.119112	0.0672633
RNF181	1.53641	0.0290798	-0.237554	0.848182	0.27283	-0.000150149	0.171342	0.00985151	-0.185795	-0.0119539	-0.23045	-0.0681442
OS9	1.53466	0.0291974	0.404929	1.32402	-0.366461	-0.149676	-0.0214148	-0.0142672	0.503857	0.0019086	0.150091	0.412042
PCBD1	1.52434	0.0298991	-0.658876	0.633371	0.169058	0.0372699	0.160117	0.482828	-0.922186	-0.0349357	-0.146552	-0.682558
SASH3	1.52255	0.0300226	-0.514026	0.700265	0.515966	0.612843	0.0633105	-0.0266108	-0.231192	-0.145133	-0.45836	-0.0559109
ARMH3	1.51515	0.030539	-0.431238	0.741625	0.0578845	0.495254	0.0110313	0.345103	-0.383139	-0.0167104	-0.0448343	-0.370994
CEP170	1.51497	0.0305511	-0.390787	0.762713	0.346695	0.233124	-0.0423487	0.320459	-0.0256988	0.0366507	-0.390542	-0.32563
CST7	1.51251	0.0307251	-0.745409	0.596499	0.371418	-0.0421996	0.708569	0.731193	0.0751884	-0.348415	-0.822672	-0.116757
NAA16	1.51178	0.0307762	0.292543	1.2248	-0.257314	-0.13386	0.00950625	-0.354918	0.224558	0.12926	0.166856	-0.0870877
TTC4	1.51133	0.0308086	-0.209383	0.864907	0.148408	0.18624	-0.0698098	0.152165	-0.178331	-0.0116529	-0.189843	-0.0407021
WDR36	1.50591	0.0311951	0.372128	1.29426	-0.481027	-0.232193	0.0253883	-0.0622156	0.09432	0.31392	0.0286094	0.301617
CERS4	1.50259	0.0314348	0.250043	1.18924	-0.184762	-0.0262629	-0.00198036	-0.0710071	0.0268365	0.264144	0.36054	0.0646365
ZNF512	1.50175	0.0314955	-0.581002	0.668499	0.157673	0.188532	0.254241	0.0304248	-0.0126541	-0.32623	-0.982312	-0.371942
RUNX1	1.49122	0.0322684	-0.555398	0.680469	0.812958	0.0358304	0.272856	0.527853	-0.0305847	-0.455233	0.0464381	-0.132715
LATS1	1.48547	0.0326984	-0.477185	0.718378	0.276881	0.185001	-0.00968063	0.301899	-0.731999	0.00446481	-0.258616	-0.16849
CD8A	1.48499	0.0327349	-0.671209	0.62798	0.0731836	1.11095	0.365433	0.363406	-0.459848	-0.0439882	-0.0401529	-0.227875
ACTR1A	1.48445	0.0327753	-0.299485	0.812542	0.22765	0.236313	-0.0118907	0.17667	-0.217148	0.00668836	0.00819966	-0.366939
ISLR	1.4822	0.0329458	0.517545	1.43152	-0.406752	-0.482838	0.0132003	-0.0494237	0.638529	-0.0474524	0.280969	0.27232
DDX49	1.48012	0.0331042	0.164046	1.12042	-0.132876	-0.0373652	-0.113813	0.0861963	0.0308752	0.144945	0.0990047	0.1835
IL13RA1	1.48007	0.0331078	0.429719	1.34697	-0.28003	-0.274504	-0.161031	0.0315654	0.621708	-0.0440531	0.188965	0.268254
GAS6	1.4785	0.0332275	0.534891	1.44883	-0.663098	0.030409	-0.117791	-0.544835	0.220341	-0.0276767	0.464024	0.187559
ARHGAP29	1.47268	0.0336763	-0.532612	0.691302	0.36418	-0.0644283	0.296515	0.333309	-0.307076	0.0658639	-0.220377	-0.739283
CROT	1.46799	0.0340414	0.404803	1.32391	-0.466228	-0.115167	-0.0171362	-0.432242	0.0421109	0.0393446	0.434899	0.0720843
IKBIP	1.4609	0.0346022	-0.511914	0.701291	0.498021	-0.00204546	0.125443	0.230532	-0.0745644	0.00572254	-0.619291	-0.507574
FAM45A	1.46007	0.0346682	-0.228034	0.853798	0.00968376	0.130191	0.03961	0.0218118	0.0515381	-0.197481	-0.29876	-0.266138
SLC4A7	1.4592	0.0347378	0.328339	1.25557	-0.446406	-0.121315	0.0296719	-0.216679	-0.00613207	0.0573084	0.22506	0.282391
S100A2	1.45758	0.0348673	-0.805766	0.572058	0.886662	0.635977	0.545179	-0.0624245	-0.926595	0.0507023	-0.0668958	-0.274883
PGM5	1.45496	0.0350785	-0.322939	0.799439	0.314832	0.0815878	-0.0928255	0.212018	-0.374156	-0.172559	-0.241135	0.0117043
P3H3	1.4532	0.0352209	0.517068	1.43104	-0.273537	-0.0164817	-0.0460057	-0.076513	0.901408	0.0200993	0.364998	0.369228
ATP6V1D	1.45261	0.035269	-0.191247	0.875849	0.106406	0.05002	0.0182221	0.0161746	-0.209959	-0.239128	0.0556373	-0.180714
40787	1.45245	0.0352814	-0.425723	0.744466	0.399579	-0.0647403	0.45654	0.188862	-0.42715	0.0661521	-0.119375	-0.242278
PRUNE1	1.45006	0.0354767	0.428244	1.34559	-0.623424	-0.0296977	-0.0658292	-0.0697979	0.359802	0.0330127	0.265253	0.266159
NDUFS3	1.44733	0.0357005	0.216652	1.16203	-0.120672	-0.20626	0.0481772	-0.0765888	0.300671	0.0237418	0.0758919	0.110961
TMLHE	1.44666	0.0357549	0.558049	1.47228	-0.173259	-0.0997394	0.0176242	-0.0540411	0.759609	0.40151	-0.0612021	0.822862
NF1	1.44523	0.0358731	-0.269799	0.829435	0.101904	0.144755	-0.0477547	0.0876713	-0.117634	-0.192064	-0.452806	-0.0301181
DOCK4	1.44429	0.0359509	0.3935	1.31358	-0.531559	-0.0823004	-0.208224	0.0290029	-0.0111278	0.320588	0.331953	0.139508
C8orf82	1.44205	0.0361366	0.767937	1.70283	-1.32695	-0.0923238	-0.16741	-0.448387	0.307301	0.227507	0.171013	0.330858
TRIM25	1.43927	0.0363693	-0.52459	0.695157	-0.001397	0.475442	0.144895	0.253619	-0.602333	0.0321895	-0.0685575	-0.587099
YIPF3	1.439	0.0363912	0.541	1.45498	-0.200461	-0.0359248	-0.0892752	-0.0318323	0.57533	0.0212055	0.271971	0.938003
TGFBRAP1	1.43633	0.0366162	-0.286963	0.819626	0.080626	-0.0153129	0.240247	0.363871	-0.0807619	-0.0283996	-0.316247	-0.0530117
SEC13	1.43405	0.0368084	-0.266046	0.831595	0.000496257	0.0893343	0.192809	0.0679135	-0.362454	0.0303518	-0.295512	-0.086017
XRCC4	1.43365	0.0368424	-0.430624	0.741941	0.437692	0.359042	-0.00376548	-0.03198	-0.204938	-0.216002	-0.526104	-0.014465
STAG1	1.43276	0.0369178	-0.385637	0.765441	0.0791268	-0.0249749	0.231526	0.074694	0.0585974	-0.525395	-0.480868	-0.234511
TANGO2	1.41589	0.0383808	0.631949	1.54966	-1.16057	-0.30525	-0.287474	-0.111647	0.256142	0.0956908	0.214635	0.0963853
VPS50	1.41544	0.0384203	0.315457	1.24441	-0.305321	-0.218353	-0.0261546	-0.00958333	0.456083	0.0916113	0.0415256	0.113194
RBM6	1.41447	0.0385066	-0.312445	0.805276	0.166287	-0.106842	0.158051	0.218605	-0.379134	-0.321654	-0.144908	0.0320175
UBE2N	1.41172	0.0387503	-0.342343	0.788759	0.00797323	0.172614	0.218079	0.195136	-0.488473	0.0230474	-0.0168503	-0.293293
SYNRG	1.41127	0.0387911	-0.332293	0.794273	0.600623	0.107347	0.160548	0.0574364	-0.11399	-0.0805239	-0.0643174	-0.144384
KIN	1.40871	0.0390207	-0.346713	0.786374	0.369031	0.348624	-0.131548	0.335176	-0.218316	-0.0512227	-0.192729	-0.00330275
PALM2-AKAP2	1.40178	0.0396475	-0.412112	0.751523	0.375183	-0.00181487	0.358886	0.195147	-0.569842	-0.0125309	-0.0722059	-0.0664671
NUP107	1.40124	0.0396968	0.367278	1.28992	-0.484566	-0.181829	0.101536	-0.144815	0.0510307	0.306632	0.0788253	0.322951
PI3	1.40085	0.0397329	1.45344	2.7386	-0.0747096	0.0267949	-0.549884	-0.446941	0.00629115	0.563018	2.01251	2.18719
METTL1	1.3985	0.0399482	0.360043	1.28346	-0.360778	0.0756807	-0.102045	-0.438791	-0.0565371	0.225371	0.240546	0.204857
OGFOD3	1.39683	0.0401025	0.666659	1.58739	-0.976901	0.0417158	-0.517976	-0.191193	0.541119	-0.0396776	0.140021	0.380819
HIST2H2AB	1.39431	0.040336	-0.697573	0.616609	0.165072	-0.118347	0.49759	0.156847	-1.00851	-0.32529	-0.797328	0.0419961
CNPY2	1.39346	0.0404151	0.165169	1.1213	-0.191481	-0.226225	0.00870815	-0.110056	0.0965556	0.0172657	0.0866638	-0.0588617
UQCC2	1.3927	0.0404853	0.437283	1.35405	-0.333847	-0.158928	0.0842817	-0.127301	0.445765	0.234243	-0.0669439	0.600272
DIP2B	1.39245	0.0405085	0.26994	1.20576	0.042771	-0.232294	-0.325903	-0.051375	0.0182138	0.186607	0.272174	0.0359644
UTP4	1.39094	0.0406501	0.547979	1.46204	-0.716188	-0.214671	0.10615	-0.335813	-0.0923169	0.373468	0.26761	0.482634
CHMP2B	1.38852	0.0408768	-0.339423	0.790357	0.0350749	0.165204	0.0432022	0.0541853	-0.536873	-0.424681	-0.0224458	-0.0760273
YWHAH	1.38743	0.04098	-0.507973	0.70321	0.388969	0.51282	0.0114904	0.35349	-0.0401552	-0.0171866	-0.0253484	-0.682431
DPP4	1.38295	0.041405	0.657024	1.57683	-0.374345	-0.0139795	-0.00748869	-0.290211	0.754891	-0.0316332	0.224278	0.994537
CARS2	1.37983	0.0417028	-0.770561	0.58619	0.15002	0.646541	-0.0203201	0.225994	0.0452792	-0.326028	-1.20224	-0.597019
CFDP1	1.37693	0.041983	-0.97461	0.508877	0.228316	-0.0800917	0.32245	0.785386	-1.36466	0.0801869	-1.05802	-0.299893
ZFX	1.37683	0.0419926	-0.48416	0.714913	0.781444	0.261424	0.362776	0.00195154	-0.386805	-0.0686404	0.067	-0.140598
ADIPOR1	1.37644	0.04203	0.733702	1.6629	-0.580958	0.00506596	-0.297094	-0.0319264	1.14837	-0.0540401	0.361352	0.574213
NAA25	1.37502	0.0421681	-0.158682	0.895843	0.0673569	-0.0145762	0.104844	0.0807531	-0.230281	0.018218	-0.0350562	-0.14923
S100A13	1.37492	0.0421778	-0.433523	0.740452	-0.0539055	0.350143	0.253108	0.0508706	-0.49817	0.122016	-0.449285	-0.308435
PAPSS1	1.37486	0.0421834	-0.258831	0.835765	0.144171	0.260206	-0.0171678	0.05912	-0.372322	0.0119701	-0.134407	-0.0942355
TRAPPC8	1.37473	0.0421956	-0.33018	0.795437	0.534197	0.0717311	0.329089	-0.0240925	-0.12576	-0.0737685	-0.151855	-0.0584124
BYSL	1.37454	0.0422148	0.2134	1.15942	-0.197495	-0.0912545	-0.000954045	-0.120035	0.0282951	0.221409	0.244413	-0.0502549
SLC25A46	1.37424	0.042244	0.278022	1.21253	-0.0230817	-0.321041	0.0277879	-0.137838	0.212301	-0.0508389	0.301986	0.194467
ASPRV1	1.37182	0.0424793	2.02499	4.0699	-1.14733	-0.0081661	-0.823931	-0.339118	1.10583	0.0118531	1.11607	3.54768
DBN1	1.37127	0.0425332	-0.677212	0.625373	0.0176342	0.0848765	0.0948634	0.645763	-0.661192	-0.36451	0.0933423	-0.93335
HGS	1.37104	0.0425558	-0.299759	0.812388	0.0632007	0.158075	0.0689416	0.256243	-0.475319	-0.0901401	0.018163	-0.105279
NDUFA4	1.36558	0.043094	-0.543577	0.686068	0.0124131	0.359026	0.312007	0.166818	-0.886724	0.0186741	-0.319034	-0.136961
SMARCAD1	1.3644	0.0432111	-0.178757	0.883464	0.242587	0.0972632	-0.0601655	0.101252	-0.0756722	-0.0658549	-0.174214	-0.0183488
PLXNA2	1.363	0.0433516	-0.25939	0.835441	0.0951802	0.123224	-0.0816792	0.0768842	-0.163686	-0.225059	-0.436799	0.00159391
LGALS1	1.36021	0.0436306	-0.791705	0.577661	-0.0859613	1.0096	0.23384	0.114465	-0.5698	0.109692	-0.733709	-0.701056
MYH14	1.36001	0.0436504	-0.661166	0.632367	0.109233	0.173659	0.714633	-0.114278	-0.744914	0.107837	-0.476508	-0.647833
FAM89A	1.35947	0.0437046	0.442799	1.35924	-0.654046	0.0535173	-0.496113	-0.126006	0.25173	-0.027139	0.125975	0.197982
ZC3HAV1L	1.35699	0.0439547	0.462059	1.37751	-0.641786	-0.21113	-0.593232	0.0180961	0.144417	0.0485561	0.328866	-0.101653
ANKRD39	1.35672	0.0439827	0.321205	1.24937	0.0526904	-0.0384861	-0.357711	-0.189287	0.141185	-0.0222538	0.403519	0.229577
ARL6IP5	1.356	0.0440557	-0.424949	0.744865	0.130789	0.269498	0.383543	0.0424736	-0.0257142	-0.105981	-0.078032	-0.663767
USP34	1.35368	0.0442914	0.455169	1.37094	-0.665296	-0.0134036	-0.0270624	-0.280533	0.455566	0.017058	0.244809	0.116947
ATP5PD	1.35279	0.0443827	-0.145546	0.904037	0.128518	0.0780379	0.101461	-0.0864745	-0.124049	-0.10601	-0.131676	0.00109288
CNTN1	1.34889	0.0447828	0.428687	1.34601	-0.328976	-0.131958	-0.176124	0.0877195	0.513859	-0.107039	0.506553	0.252037
DEF6	1.34419	0.0452698	-0.298765	0.812948	-0.0979395	0.261815	0.167731	0.14049	-0.146493	-0.240697	-0.383809	0.0480326
MASP1	1.34312	0.0453817	1.05454	2.07706	-0.0576319	-0.286539	-0.0763373	-0.451109	1.97661	0.0686532	0.793128	0.508148
CPTP	1.34188	0.0455114	0.378032	1.29957	-0.112423	-0.0674456	0.0435297	-0.310874	0.398066	-0.120788	0.445705	0.34193
ELMO3	1.34143	0.0455585	0.453292	1.36916	-0.584387	-0.540547	-0.151237	0.0523447	0.0613239	-0.0115456	0.414932	0.124632
GRSF1	1.3406	0.0456456	0.213704	1.15966	0.00158017	0.0537466	-0.139311	-0.0636771	0.294006	0.026449	0.0731271	0.313573
VDAC3	1.33896	0.0458183	-0.310695	0.806253	0.429584	0.296536	0.311177	-0.074679	0.092352	-0.144547	-0.0657365	-0.162229
INTS14	1.33788	0.045933	0.393981	1.31401	-0.362303	-0.016945	-0.0151558	-0.0204991	0.351388	0.338255	0.547625	-0.0762458
USP7	1.33524	0.0462122	0.235641	1.17743	-0.026875	0.0338765	-0.0578984	-0.179643	0.153918	-0.0313364	0.366579	0.222865
SNRPB2	1.33119	0.0466457	-0.617239	0.651917	0.037225	-0.0224975	0.250843	0.421274	-0.982861	-0.25363	-0.606744	0.0611211
NECTIN2	1.32984	0.0467906	-0.334583	0.793013	0.262354	-0.0612449	0.267995	0.0324563	-0.493261	-0.132009	-0.217632	0.00613035
THEM5	1.32584	0.0472237	1.01628	2.0227	-0.151681	0.0100963	-0.059538	-0.218316	0.0235779	1.03007	0.635709	1.95633
RABGGTA	1.32534	0.0472784	-0.367819	0.774953	0.106172	0.417063	0.137137	0.0187556	-0.225218	-0.0997397	0.0494531	-0.516643
GTF3C2	1.32384	0.0474416	0.452789	1.36868	0.00204755	0.01261	-0.109763	-0.171543	0.35964	-0.0883411	0.743923	0.529287
WDR20	1.32244	0.0475945	0.218214	1.16329	-0.0901039	-0.104008	-0.201873	0.0180414	0.000534939	0.0967565	0.342302	0.0553207
GYS1	1.31997	0.0478665	0.439245	1.35589	-0.22396	0.046196	-0.31421	-0.263038	0.712429	0.0230763	0.0765698	0.189893
MAN2C1	1.31935	0.0479352	-0.478867	0.717541	0.564996	0.333934	0.323581	-0.111566	-0.105382	-0.582453	-0.140349	0.0236616
BAG3	1.3183	0.0480509	1.00216	2.00299	-0.552006	-1.14	-0.397457	0.0168544	0.0210876	1.36277	0.595363	-0.0431993
NDUFV1	1.31583	0.048325	0.277417	1.21202	-0.236325	-0.412601	-0.0302075	-0.0056028	-0.0109206	0.130555	0.259148	0.046148
CRYZ	1.31534	0.0483798	-0.484152	0.714917	0.452137	0.620941	0.370065	-0.122582	-0.183466	-0.459739	0.0588514	-0.0316928
GIMAP2	1.31388	0.0485425	-0.753824	0.59303	-0.103982	0.613489	0.407987	0.178482	-0.943702	0.0500383	-0.922438	-0.103219
POMK	1.31308	0.0486319	-0.670117	0.628456	1.09352	0.316288	0.00366236	0.303322	-0.0477242	-0.184038	-0.650848	-0.0810635
COPRS	1.31298	0.0486429	-0.817887	0.567272	0.125147	0.942083	0.0917595	0.279061	-1.22735	-0.223572	-0.0222407	-0.360338
KRT72	1.31188	0.0487665	0.747044	1.67835	-0.382959	-0.198305	0.0920651	-0.365442	-0.0757007	0.215746	1.16284	0.830649
PPP1R11	1.31104	0.0488612	0.218286	1.16335	-0.346204	0.00807191	-0.0296431	-0.128986	0.147735	-0.0142664	0.155554	0.0873612
EIF4EBP1	1.30853	0.0491438	-0.133083	0.911881	0.107075	0.22769	-0.0115625	0.0667522	-0.0148681	0.00635861	-0.0435305	-0.0903357
PITRM1	1.30823	0.0491774	-0.236155	0.849005	0.204142	0.122535	0.0343908	0.00605157	-0.0787521	-0.312717	0.0627573	-0.248791
SLMAP	1.30769	0.0492389	-0.266211	0.831501	0.252102	0.0762511	0.0192726	0.128343	0.0048632	-0.423707	-0.0411796	-0.128852
LRRC1	1.30757	0.0492524	0.395989	1.31584	0.0240277	-0.442371	-0.184368	-0.0935996	0.242015	0.00710702	0.572378	0.0661452
MOB4	1.30281	0.0497956	0.375279	1.29709	0.0625994	-0.12474	-0.310713	-0.393754	0.500125	-0.0326835	0.185714	0.0813523
ITPR2	1.30268	0.0498109	0.51462	1.42862	-0.440169	-0.149917	0.115474	-0.472143	0.456055	-0.192145	0.478076	0.36974
KDM3B	1.30264	0.0498145	0.380971	1.30222	-0.629468	-0.00460452	-0.0168245	-0.0940609	0.236318	0.187095	0.0747162	0.280795
ARID3A	1.30238	0.0498446	-0.659158	0.633248	0.77749	0.00902215	-0.0306133	0.134831	-0.779445	-0.426591	-0.637794	0.0979283
CGGBP1	1.29853	0.050289	-0.350508	0.784308	0.286057	-0.00811681	0.0666915	0.227914	-0.584716	-0.0820425	-0.102576	-0.0601538
ABCB7	1.29636	0.05054	0.432061	1.34916	0.069975	-0.555735	-0.116159	-0.641856	-0.0103704	0.157851	0.190596	0.146392
CUL5	1.29489	0.0507116	-0.176109	0.885087	0.108248	0.00957767	0.0552334	-0.00963588	-0.22626	-0.265541	0.0237297	-0.0729423
WASF2	1.29253	0.0509879	-0.487796	0.713114	-0.00699971	0.198093	0.36069	0.465072	-0.707293	-0.161562	0.117445	-0.18292
MAP1S	1.29191	0.0510614	-0.352933	0.782991	0.044041	0.0254732	0.203587	0.112283	-0.00330964	-0.31135	-0.62646	-0.0852263
NBAS	1.29135	0.0511269	0.173784	1.12801	-0.240086	-0.0168469	0.037402	-0.158846	0.168681	0.0204593	0.0457275	0.0818914
MSTO1	1.29056	0.0512198	0.187962	1.13915	-0.00885508	-0.158322	0.00919236	-0.166817	0.218601	-0.0148052	0.206045	0.0172067
SH3RF2	1.29023	0.0512585	0.473211	1.3882	-0.199005	-0.302571	0.000669373	-0.0364996	0.0241327	0.0899164	0.426509	0.814881
MCMBP	1.29009	0.0512751	-0.211637	0.863557	0.11392	-0.0195957	0.0995278	-0.0072969	-0.269323	0.0663177	-0.273607	-0.183381
SEC23IP	1.28861	0.0514505	-0.302772	0.810693	0.12101	-0.0963624	0.171743	0.269912	-0.320306	0.0502959	-0.371285	-0.103492
THEM6	1.28748	0.0515849	0.487201	1.40172	0.0737206	-0.118209	-0.157814	-0.0750261	0.774627	-0.122885	0.603281	0.416455
PDLIM3	1.28526	0.0518486	0.424523	1.34213	0.022805	-0.690537	-0.167701	-0.309464	0.0643265	0.351597	0.200897	-0.0636243
SUB1	1.28071	0.052395	-0.532337	0.691434	0.51338	0.323863	0.0289259	-0.06597	-0.548023	-0.185953	-0.685116	0.0899424
UQCC1	1.27835	0.0526808	0.308341	1.23828	-0.189334	-0.178081	0.119034	-0.109847	0.398512	-0.0489851	0.146438	0.37917
UBE4A	1.27559	0.0530158	0.321856	1.24994	-0.531141	0.042418	-0.186732	-0.369083	0.112879	-0.0160223	0.182502	-0.0364733
VTA1	1.27395	0.0532175	0.259877	1.19738	-0.451973	-0.0858326	-0.292221	0.0144193	0.00434873	0.0596298	0.133819	0.0261018
KRT84	1.27388	0.0532259	0.708186	1.63375	-0.62848	-0.58279	0.216317	-0.721064	-0.196443	0.736527	0.43545	0.141196
DHRS7B	1.27168	0.0534953	0.224474	1.16835	-5.92492e-05	0.00871003	-0.0133497	-0.0826595	0.339844	0.00815246	0.0867906	0.375751
MAPRE3	1.27057	0.0536325	-0.546921	0.684479	0.0387914	-0.0241011	0.267556	0.700579	-0.53673	0.166534	-0.391198	-0.443465
COG2	1.27007	0.0536944	0.368516	1.29102	-0.0622366	0.0117898	-0.132271	-0.0842722	0.637649	-0.00237204	0.102034	0.469764
GPS2	1.26955	0.0537593	-0.407567	0.753894	0.116006	0.080699	-0.0199448	0.0642189	-0.477688	0.0147341	-0.748661	-0.177673
FKBP5	1.26745	0.0540196	-0.613172	0.653758	-0.285101	0.59309	0.448034	0.564127	-0.527269	-0.142154	-0.538715	0.0755985
PPP1R9B	1.26703	0.0540719	-0.320171	0.800975	0.0874724	0.117519	0.122202	-0.0595591	-0.3476	0.0479914	-0.166501	-0.546942
PCMT1	1.26611	0.0541866	-0.285724	0.82033	0.402486	-0.0171598	0.057632	0.247207	-0.293648	0.0207675	-0.0105962	-0.169256
PCDH7	1.2653	0.0542871	0.453054	1.36894	0.0546744	-0.1016	-0.730735	-0.384773	0.175982	0.380874	0.0555146	0.0374134
VPS4A	1.26526	0.0542926	0.135573	1.09853	-0.154085	-0.00971388	-0.160451	0.0545326	0.0435675	0.071877	0.0365739	0.120556
MMP3	1.26377	0.0544795	1.01947	2.02717	-0.920451	-0.73848	-0.114394	0.0723497	1.48246	0.128276	-0.070694	0.83685
DCAF5	1.26299	0.0545774	-0.688903	0.620325	0.656607	0.0766152	-0.103096	0.313349	-0.956052	0.185957	-0.4525	-0.589543
RWDD1	1.26157	0.0547558	-0.548192	0.683876	0.784028	-0.103898	0.500518	0.275714	-0.579057	0.00996082	-0.105314	-0.0619968
CDH5	1.26125	0.0547965	-0.456007	0.729001	0.45817	-0.146295	0.503942	0.289365	-0.315824	-0.430355	0.115826	-0.0884956
ARID1A	1.26119	0.0548039	-0.284158	0.821221	0.349259	-0.0857345	0.128536	0.0861275	-0.265464	-0.0802205	-0.326074	0.0133171
PGM3	1.25905	0.0550745	-0.240849	0.846247	0.0784727	0.0961322	0.141377	-0.062636	-0.368765	0.0509018	-0.268924	-0.123264
KLF5	1.25801	0.0552069	0.350941	1.27539	-0.103149	-0.123404	-0.0968394	-0.00732369	0.0598516	-0.00333585	0.40377	0.612762
LILRA3	1.25793	0.0552166	-0.44162	0.736307	0.41259	0.283368	-0.0980488	0.0771802	0.118521	-0.550315	-0.444783	-0.214814
BLOC1S2	1.25663	0.0553827	-0.346559	0.786458	0.174808	0.0790676	0.133897	-0.0108761	-0.524143	-0.123584	0.080118	-0.441729
CTBS	1.25447	0.055658	-0.587745	0.665382	0.776453	-0.0425762	0.379774	0.0149145	0.158157	-0.378844	-0.424314	-0.577413
PANK2	1.25385	0.0557379	-0.21945	0.858893	0.288797	0.103649	0.012921	-0.00839918	0.0279311	-0.280716	-0.127466	-0.100581
38961	1.25328	0.0558108	-0.258043	0.836222	0.110724	-0.0264277	0.00472264	0.0024133	-0.152292	-0.22532	-0.527071	-0.0360565
SGCD	1.25246	0.0559159	0.416881	1.33504	-0.136362	-0.616325	0.056474	-0.428447	0.00900334	0.0404332	0.41126	0.0821676
BTN3A1	1.25107	0.0560952	-0.260084	0.83504	0.247738	0.316824	0.0998722	-0.0679995	-0.0848665	0.0559472	-0.281133	-0.133847
ATP6V1E1	1.25064	0.0561518	-0.18782	0.877931	0.00603924	0.239151	0.130253	0.0472454	-0.210745	-0.140282	0.0694491	-0.0470139
HACL1	1.2503	0.0561951	0.318527	1.24706	-0.449059	0.119259	-0.18753	-0.115567	0.266156	0.0880663	0.00722835	0.279761
PELO	1.24903	0.0563595	0.270373	1.20612	-0.475456	0.0550884	-0.214392	-0.278254	0.0489212	0.001119	0.13417	-0.0157338
ELAVL3	1.24722	0.0565953	-0.923604	0.52719	1.02304	-0.257393	0.753543	0.197174	-0.483545	0.223784	-0.660199	-1.05809
FZD6	1.24677	0.0566538	0.38332	1.30434	-0.343049	-0.449125	-0.264625	0.183339	0.121871	0.132226	0.0031581	0.402566
RUVBL2	1.24423	0.0569866	-0.195818	0.873078	-0.0707104	0.133164	0.0775052	0.219519	-0.251573	-0.0856236	-0.110988	0.0243893
ITM2B	1.24384	0.0570371	0.346918	1.27184	-0.176635	-0.203111	-0.123215	0.124518	0.576553	0.0406531	0.0584461	0.333575
HIST1H1C	1.24311	0.0571333	-0.613232	0.653731	0.584246	-0.192666	0.438991	0.154928	-0.742434	-0.0766259	-0.668054	0.0196862
ARMC10	1.24286	0.0571668	0.41747	1.33558	-0.532756	-0.173184	0.097721	-0.257711	0.233984	-0.112503	0.479286	0.203181
GALC	1.24243	0.0572228	0.412749	1.33122	0.029344	-0.129274	-0.0233669	-0.254675	0.639759	0.0550992	0.0158912	0.562273
MAT2B	1.24129	0.057373	-0.291291	0.81717	0.0360297	0.200577	0.0245944	0.273546	-0.470288	-0.00504386	-0.0243039	-0.130782
ARHGAP30	1.24087	0.0574293	-0.648394	0.63799	0.833069	0.0939438	0.170876	-0.0662061	-0.128293	-0.570809	-0.845099	-0.0176935
MFGE8	1.24073	0.057448	0.313718	1.24291	-0.00908334	-0.393796	0.0707745	-0.199076	0.382746	0.039602	0.0434979	0.257847
ALG12	1.23522	0.0581802	0.444857	1.36118	-0.241311	0.0839097	-0.218805	-0.116696	0.700547	-0.135948	0.279727	0.442199
C15orf38-AP3S2	1.23405	0.0583373	-0.496594	0.708778	0.246868	-0.0569208	0.378416	0.0923986	-0.606979	-0.674305	0.138737	-0.183069
DUSP23	1.23375	0.0583781	-0.418562	0.74817	-0.0377977	0.714139	0.249462	0.218063	-0.0579378	0.0666214	-0.33771	-0.201353
C19orf12	1.23364	0.0583935	-0.36576	0.77606	0.180469	0.127353	0.0714714	-0.0533356	-0.485205	0.0420666	-0.112437	-0.581506
NFKB1	1.23273	0.0585149	-0.141471	0.906594	0.0329566	0.0654393	0.0798485	0.0200574	-0.127608	-0.121847	0.0779315	-0.19606
CXorf38	1.23272	0.0585165	-0.304218	0.809881	0.388149	-0.0381384	0.383008	0.0265115	0.0713118	-0.219907	-0.164107	-0.144638
MYL12A	1.23199	0.0586152	-0.191053	0.875966	0.20595	0.214786	-0.0441392	0.194428	-0.153458	0.0383735	0.0479456	-0.12605
TMED9	1.23011	0.0588697	0.173476	1.12777	-0.166311	0.026236	-0.016586	-0.0313627	0.257529	0.0113895	0.0308269	0.206134
CLCA2	1.22902	0.0590177	0.650396	1.5696	-0.15753	0.0839542	-0.372861	-0.116746	-0.2253	0.810231	0.959994	0.493474
KLC2	1.22553	0.0594937	-0.532119	0.691539	0.680443	0.8814	-0.15302	0.410658	0.0383311	-0.192754	-0.0943733	-0.0601969
SLC44A1	1.22501	0.0595652	0.341771	1.26731	-0.57889	-0.0598526	-0.0791722	-0.0179967	0.296473	0.00745404	0.230493	0.0967531
ELP6	1.22501	0.0595654	0.266549	1.20293	-0.329264	0.0621254	-0.0869576	-0.128125	0.177291	-0.0941586	0.247553	0.253292
HEXA	1.22283	0.0598649	-0.428125	0.743227	0.0605558	0.546083	0.237692	-0.0609802	-0.260333	0.0518249	-0.569454	-0.151188
IBTK	1.22283	0.0598652	-0.599998	0.659755	0.744339	-0.0904666	0.0643956	0.339524	-0.564592	-0.167344	-0.706144	0.0958828
ABCA12	1.22114	0.0600974	0.525534	1.43947	-0.0321187	-0.191764	-0.412153	0.0309	0.130169	-0.067923	0.795902	0.638854
KCTD10	1.22015	0.060235	0.210805	1.15733	-0.0134815	-0.230449	-0.303236	0.0382233	0.04867	0.00137332	0.102592	0.181643
SNRPA	1.21491	0.0609669	-0.692484	0.618787	0.177663	0.442035	-0.0269207	0.148013	-1.30745	0.0216307	-0.464082	-0.279246
GID8	1.21434	0.0610458	0.362274	1.28545	-0.440208	-0.00627146	0.0460817	-0.460513	0.0401333	-0.0097215	0.32388	0.233893
TM4SF1	1.21368	0.0611395	-0.663539	0.631328	0.238771	0.397539	-0.271495	0.366305	-0.748702	0.246661	-0.751496	-0.669502
STAM2	1.21325	0.0612002	-0.11047	0.926286	0.00586283	0.0757347	0	0.0335579	-0.115651	-0.103369	-0.156219	0.0485135
ARHGEF18	1.21283	0.0612596	-0.372528	0.772428	0.547552	0.306331	0.0128237	0.0305355	-0.363105	-0.0195015	0.061273	-0.271536
ACADS	1.21143	0.061457	0.303914	1.23449	-0.414026	0.017421	-0.0144321	-0.186809	0.352037	-0.0544326	0.0890816	0.231125
TMPO	1.211	0.0615179	-0.516616	0.69901	0.143448	0.0906886	0.198905	-0.0129338	-0.959024	0.00235579	-0.572541	-0.117145
NACC1	1.21059	0.0615753	-0.313665	0.804595	-0.10525	0.341122	0.250347	0.160364	-0.435446	-0.0225167	-0.119879	-0.0302342
RECQL	1.20843	0.0618825	-0.265476	0.831924	0.161927	0.0735702	0.00709504	-0.0430986	-0.290754	0.0987645	-0.382606	-0.287814
APBA1	1.20789	0.0619602	-0.628416	0.646886	0.364275	-0.059889	0.156418	0.0324985	-0.544154	-0.493665	0.141502	-1.12404
TOR4A	1.20783	0.061969	-0.457287	0.728355	0.0249536	0.397384	-0.0189399	0.274152	-0.186517	-0.312676	-0.741845	0.0894393
AP4E1	1.20577	0.0622625	0.314683	1.24374	0.00750452	0.00727507	-0.271401	-0.108174	0.516784	-0.034965	0.310252	0.101867
TBC1D9B	1.2048	0.0624023	-0.231766	0.851592	0.000262422	0.240275	0.145999	0.0838375	-0.265493	0.0305789	0.0454116	-0.267187
CARD18	1.20023	0.0630626	0.772386	1.70809	-0.715033	-0.580533	-0.156395	0.108138	-0.243856	0.335502	1.11835	0.535723
TWF2	1.19939	0.0631847	-0.277984	0.824743	-0.142551	0.377811	0.213725	0.228952	-0.182903	-0.091468	-0.192393	0.0327671
NDUFB8	1.19778	0.0634193	0.237688	1.1791	0.0137139	-0.0827236	-0.00772876	-0.108777	0.317062	-0.0106628	0.404643	0.0541961
CTSB	1.19558	0.0637406	-0.538492	0.68849	-0.0170134	0.109896	0.390789	0.609579	-0.780837	-0.27616	0.127013	-0.130736
SGPL1	1.19554	0.063747	-0.529917	0.692595	-0.0219356	0.704773	0.0933391	0.240541	-0.383408	0.0518248	-0.0646867	-0.70668
SPG21	1.19497	0.0638311	-0.211522	0.863626	0.356047	0.22168	0.0681726	-0.0075601	0.0112522	-0.172692	0.0287441	-0.075053
CHTF8	1.19474	0.063864	-0.523316	0.695771	0.231161	0.288047	-0.098439	0.848124	-0.498154	0.0886975	-0.251789	-0.163128
HSPA9	1.19426	0.0639348	0.210015	1.1567	-0.145214	-0.144612	0.0804173	-0.0811168	0.0983062	0.308617	-0.0500716	0.192684
WDR70	1.19394	0.0639823	0.256219	1.19434	-0.335228	-0.00993976	-0.0988683	-0.0168402	0.233877	0.0807341	-0.0639081	0.313299
THADA	1.19253	0.0641902	0.297602	1.2291	-0.569142	-0.0185497	-0.0664915	-0.284757	0.0793313	0.0974238	0.124535	-0.0498221
EXOC6	1.19115	0.064395	0.346638	1.27159	-0.243751	0.050312	-0.0740494	-0.238591	0.416324	-0.174464	0.381268	0.257345
ITCH	1.19106	0.0644077	0.414384	1.33273	-0.386655	-0.103334	0.143331	-0.229952	0.533173	-0.0995117	0.180747	0.466517
DVL2	1.19031	0.0645195	0.309923	1.23964	-0.44104	-0.0268417	-0.0604205	-0.000218004	0.389647	-0.0487782	0.174535	0.195767
PLEKHN1	1.19016	0.0645417	0.465723	1.38101	-0.736356	0.0937839	-0.261135	-0.356421	0.265546	0.0827356	0.393121	-0.138638
COMMD2	1.19004	0.0645602	-0.261007	0.834505	0.0175372	0.117075	0.0143687	0.0525554	-0.178626	-0.338029	0.0934388	-0.419276
ELMSAN1	1.18864	0.0647679	0.30331	1.23397	-0.180265	-0.0397241	-0.109841	0.0121952	0.238436	0.54852	-0.0730508	0.181698
VPS37C	1.18818	0.0648371	0.41549	1.33375	-0.625754	-0.13658	0.0204681	-0.057025	0.141417	-0.0265649	0.236224	0.511995
DNAJC9	1.18773	0.064904	-0.644719	0.639618	0.576298	0.299666	-0.114475	0.0724208	-0.957053	0.221386	-0.521172	-0.488126
SLC35A2	1.18736	0.0649592	-0.397084	0.759392	0.371541	0.0164987	0.164757	0.021062	-0.632292	-0.0131744	0.0125147	-0.381525
RTN1	1.18624	0.065127	-0.464336	0.724805	0.547486	0.0390636	0.460445	-0.0673051	-0.538417	-0.266632	-0.210331	0.137726
MRPL44	1.18382	0.065491	0.168972	1.12426	-0.0805933	-0.0735348	0.118074	-0.17007	0.227134	0.0730295	0.0238533	0.145747
LUC7L	1.18371	0.0655069	-0.424971	0.744854	0.0941769	-0.0387234	0.0165822	0.197493	-0.287153	-0.235796	-0.877149	-0.0302589
AIP	1.18334	0.0655635	-0.440435	0.736912	0.529326	0.0659341	-0.0911665	0.185443	-0.415677	-0.171171	-0.573987	0.0886317
SNRNP40	1.1825	0.0656895	0.234351	1.17638	-0.432332	-0.0318066	0.0130413	-0.20683	0.0652243	0.143576	0.0333486	0.0373279
MFSD6	1.18221	0.0657343	0.395763	1.31564	-0.42391	-0.236464	0.0267821	-0.0636927	0.276382	-0.197863	0.468001	0.339248
OPTN	1.18147	0.0658465	-0.583231	0.667467	0.18569	0.622574	-0.0342862	0.224493	-0.935275	0.0288409	-0.0363402	-0.391676
AKAP10	1.18062	0.0659747	-0.20912	0.865065	0.278469	-0.00627146	0.0040663	0.128491	-0.236293	0.00996082	-0.00115524	-0.204238
GAN	1.17795	0.0663823	0.539679	1.45365	-0.952084	-0.187397	-0.00894169	-0.0690509	0.0338924	0.144631	0.259961	0.502759
S100A10	1.17773	0.0664161	-0.631145	0.645664	0.0723175	0.36158	-0.0318068	0.272432	-0.863646	0.0264218	-0.0310005	-0.981831
MRPS31	1.17631	0.0666335	0.264503	1.20122	-0.237825	-0.37498	0.133312	-0.173343	0.177178	-0.044002	0.141823	0.130175
CD48	1.17543	0.0667677	-0.45912	0.72743	-0.0258422	0.0603445	0.611012	0.121977	-0.0607073	-0.336524	-0.655299	-0.0164594
AP2M1	1.17503	0.0668291	-0.185568	0.879303	0.0396382	0.0589856	0.0725594	0.14536	-0.19216	-0.00873698	0.0598968	-0.28473
PYCR3	1.17335	0.0670885	0.234521	1.17652	-0.11987	-0.213123	-0.0308658	-0.00495834	0.385823	-0.0703584	0.145988	0.107813
CBFB	1.17298	0.0671458	-0.372334	0.772532	-0.0740351	0.427109	0.0142051	0.180641	-0.515777	-0.0200099	-0.377933	-0.0276972
TIPRL	1.17098	0.0674559	-0.177273	0.884373	0.0528297	0.126539	-0.0168409	0.0177268	-0.3221	0.0116441	-0.05053	-0.16785
EMG1	1.17042	0.0675435	0.294856	1.22676	-0.45218	-0.0574692	0.0702882	-0.119871	0.233493	-0.0376878	0.135931	0.288456
RNASEH2A	1.16996	0.0676143	-0.445774	0.73419	0.0679736	0.0817846	-0.0252801	-0.0104453	-0.679165	-0.14991	-0.827572	-0.0124149
PGM1	1.16887	0.0677837	-0.307509	0.808036	-0.00353168	0.0944031	0.0987428	0.00379599	-0.130219	-0.613545	-0.308239	0.0153759
COL18A1	1.16831	0.0678727	-0.674921	0.626366	0.668935	-0.296682	0.88497	0.627834	-0.649556	-0.109665	-0.103873	0.0484653
ATRX	1.16791	0.067935	0.341114	1.26673	-0.363801	-0.437855	0.150545	-0.114621	-0.0120529	0.060325	0.232477	0.317974
CYB5R1	1.16699	0.0680777	0.461414	1.37689	-0.070455	-0.196609	-0.532823	-0.0133048	0.675999	0.00273056	0.403103	-0.0493686
CLPTM1	1.16642	0.0681673	0.195601	1.1452	0.00698859	0.0366876	-0.287063	-0.0805442	0.054186	0.120883	0.0323468	0.251059
CASP3	1.16556	0.0683025	0.300549	1.23161	-0.340955	-0.0142237	-0.00724712	-0.158003	0.295011	0.389176	0.108593	-0.111012
LEMD2	1.16394	0.0685589	-0.183072	0.880826	0.246039	-0.0132009	0.217373	0.125963	0.0470297	-0.159273	0.0745168	-0.118387
SPECC1L	1.1623	0.0688175	-0.26187	0.834006	0.0667555	-0.0214386	0.0384632	0.187928	-0.390071	-0.168705	0.104815	-0.321809
BSDC1	1.15916	0.0693176	-0.215418	0.861297	-0.035208	0.127983	0.0146345	0.275294	-0.29657	0.038379	-0.129789	-0.090986
KIF21A	1.15793	0.0695141	-0.160944	0.89444	0.210063	0.186374	-0.0259302	0.0197254	0.050828	-0.103907	-0.0522133	-0.148252
SERPINB9	1.15788	0.0695215	-0.519778	0.697479	0.303674	0.275269	0.435213	-0.211212	-0.444211	0.10353	-0.773429	-0.162057
SPG7	1.15708	0.0696494	0.18345	1.1356	-0.270521	-0.00309315	-0.0183412	-0.117219	0.0920098	-0.0664869	0.092984	0.20612
PAK1IP1	1.15668	0.0697146	-0.151959	0.900027	0.1715	0.107464	-0.0353427	-0.000590623	-0.0932375	-0.0732241	-0.219888	0.0215427
PSAP	1.15635	0.0697666	-0.29398	0.815649	-0.0535883	0.0648115	0.302365	0.0902887	-0.322804	0.10977	-0.169405	-0.389603
MRPS33	1.15587	0.0698435	0.21884	1.1638	-0.115038	-0.218973	0.0862947	-0.0822914	-0.0315436	0.0692149	0.183237	0.324446
ACOT7	1.15471	0.0700302	-0.617706	0.651706	0.10815	0.945282	0.00894916	-0.0148708	-0.175727	0.00431049	-0.681067	-0.570831
NPC2	1.15394	0.070155	-0.508652	0.702879	0.716773	0.235738	0.0895612	-0.117622	-0.598744	0.100956	-0.39612	-0.216249
MACROD1	1.15336	0.0702487	0.415286	1.33356	-0.627069	-9.28736e-05	-0.0213608	-0.452839	0.396729	-0.112758	0.175932	0.0998793
NDUFS8	1.15136	0.0705731	0.182897	1.13516	-0.150021	-0.252076	0.0722072	-0.250274	0.0973267	0.0127904	0.0869707	-0.0456632
AP1M2	1.15054	0.070707	0.482034	1.39671	-0.374551	0.00497033	-0.271809	-0.0318294	0.2636	-0.0156582	0.887184	0.119792
CORO1A	1.15052	0.0707091	-0.792088	0.577508	0.465597	0.0423362	0.0188432	0.115243	0.00531392	-0.639846	-1.59087	-0.30093
LEPROTL1	1.1496	0.0708598	-0.296825	0.814042	0.549111	0.124243	0.243078	-0.0204991	-0.130091	-0.0587518	0.0898057	-0.192329
MAPKAPK2	1.1495	0.070876	-0.313236	0.804834	0.62853	0.0167699	0.169587	0.145439	0.0167178	-0.207353	-0.0104886	-0.0914951
YES1	1.14872	0.0710043	0.556241	1.47043	0.085146	-0.0610618	-0.437403	-0.345169	0.773053	0.0627461	-0.0928454	0.723522
IRAK4	1.14852	0.0710361	0.361603	1.28485	-0.302954	0.00314351	-0.0246326	-0.0974525	0.655627	-0.000784454	0.314984	0.0546908
SNAP23	1.14851	0.0710385	0.238253	1.17956	0.046083	-0.295476	-0.101897	-0.0458403	0.283802	0.24846	-0.0724175	0.0960361
SUPV3L1	1.14768	0.0711735	-0.408529	0.753391	0.606142	-0.142882	0.269147	0.43112	-0.0866967	0.126536	-0.178237	-0.332191
CPSF1	1.14721	0.0712506	0.156184	1.11434	0.0368512	-0.0221153	-0.125147	-0.0776838	0.00939314	0.0817978	0.290308	0.0551426
PTPN23	1.14721	0.0712508	-0.37732	0.769866	0.173359	0.434694	0.241562	-0.0218189	-0.581795	-0.0691168	0.0911243	-0.121697
TMEM199	1.14573	0.0714943	-0.230487	0.852347	0.285782	-0.0851111	0.0370762	0.229137	-0.281795	0.000989765	-0.121178	-0.0530811
STXBP1	1.14529	0.071567	-0.194842	0.873669	0.259597	0.0764105	-0.0532556	0.0733522	0.0772527	-0.182401	-0.176795	-0.141319
CSNK1G1	1.14293	0.0719558	0.345333	1.27044	-0.586904	-0.00533555	-0.0160923	-0.225366	0.0761908	-0.0184022	0.126776	0.36307
ARL2	1.14286	0.0719685	-0.345913	0.78681	-0.0867827	0.291312	0.222641	0.140081	-0.174817	-0.589116	-0.0909129	0.0384457
HNMT	1.14215	0.0720852	-0.610685	0.654886	-0.0307892	0.113399	1.0554	0.349535	-0.288902	-0.553539	0.139967	-0.252719
NKRF	1.14149	0.0721962	0.482416	1.39708	0.105312	-0.251672	-0.427257	-0.109844	-0.164045	0.173126	0.585056	0.652066
ERI3	1.14056	0.0723509	0.364661	1.28758	-0.765984	-0.241835	0.00995809	-0.167769	0.0860619	0.0350748	0.0642469	0.107632
GLYR1	1.13971	0.072492	-0.315227	0.803725	0.0751683	-0.0623595	0.150854	0.0543438	-0.501382	-0.431249	-0.223968	0.113699
TCP11L2	1.13968	0.0724967	0.376625	1.2983	-0.331701	0.123789	-0.188487	-0.163457	0.410245	-0.153175	0.494599	0.194976
LIMD1	1.13964	0.0725043	-0.237278	0.848344	0.182041	0.0728401	-0.0181708	0.160428	-0.394107	0.0129696	0.0235518	-0.194389
CLIC2	1.13918	0.0725812	-0.567185	0.674932	-0.00281156	0.910248	0.459727	0.0594372	-0.627164	0.0335594	0.00517889	-0.253715
PUDP	1.13897	0.0726154	-0.723801	0.6055	-0.0118497	0.8673	0.163602	0.0117906	-1.0435	0.218728	-0.457086	-0.582505
ATR	1.13784	0.0728047	-0.311912	0.805573	0.0310949	-0.0162555	0.0940318	0.235887	-0.484424	-0.121189	-0.395223	0.0979443
GNB2	1.1378	0.0728111	0.296938	1.22853	-0.368853	-0.157351	0.0578052	-0.211838	0.144373	-0.0135118	0.415554	-0.0389
TNIP2	1.13772	0.0728249	0.463019	1.37842	-0.702905	-0.14896	0.114682	-0.290017	-0.124142	0.163257	0.47873	0.307028
SLC41A3	1.13706	0.0729351	-0.521608	0.696595	1.04362	-0.0210989	0.23272	0.403362	-0.326235	0.0246373	-0.0152196	-0.111008
SARS2	1.13702	0.0729422	0.128545	1.09319	-0.00591136	-0.175004	0.0114358	-0.0500227	0.119611	-0.050325	0.124571	0.10082
H1F0	1.13624	0.0730738	-0.588095	0.665221	0.0490129	0.031231	0.213581	-0.0215852	-1.22689	0.011046	-0.595546	-0.268754
TFCP2	1.13615	0.073089	0.410518	1.32916	-0.396606	-0.562539	-0.088049	0.101417	0.499038	0.170056	0.0599057	-0.032704
INTS4	1.13451	0.0733648	-0.158246	0.896114	-0.115737	0.106607	0.124614	0.107232	-0.152721	-0.0408225	-0.203783	-0.0129405
FOCAD	1.13311	0.0736019	0.287727	1.22072	-0.275697	-0.157254	0.129847	-0.088226	0.198371	-0.0253874	0.124309	0.462284
DCAF13	1.13268	0.0736748	0.311203	1.24074	-0.474516	0.0123661	-0.0340372	-0.104768	0.435857	0.0651663	0.0605201	0.082312
S100A7A	1.13234	0.0737333	1.62755	3.08987	-1.06799	-0.516086	-1.03575	0.32527	0.691133	-0.445708	1.1461	2.8241
CD274	1.13164	0.0738515	1.11962	2.17289	-0.186587	0.175306	-0.813092	-0.595596	1.67608	0.820783	-0.537162	1.0988
ESYT1	1.13128	0.0739136	-0.244713	0.843984	0.0173744	0.261984	0.277123	0.0506548	-0.0549961	-0.0705772	0.0936008	-0.339743
SLC39A7	1.13015	0.074105	-0.337851	0.791219	0.261512	-0.0346301	0.060073	0.124643	-0.0116841	-0.263643	-0.630293	-0.0341849
ADAM10	1.12929	0.0742531	-0.225973	0.855018	0.446253	0.129295	-0.0134304	0.0292736	-0.0501017	-0.0894925	-0.109183	-0.0637243
SLC25A11	1.12857	0.0743748	0.262237	1.19934	-0.401395	-0.0343503	0.0455147	-0.233652	0.23349	0.0375034	-0.0515565	0.205628
RBBP6	1.12781	0.0745065	-0.22039	0.858333	0.233107	0.124298	-0.0819004	0.00870952	-0.335586	-0.011946	-0.209396	-0.0404176
NDRG3	1.12745	0.0745683	-0.161391	0.894163	-0.0858866	0.093395	0.127795	0.159635	-0.172094	-0.136516	-0.100767	0.0587526
CAPZB	1.1267	0.0746968	-0.335378	0.792576	0.219436	-0.00544638	-0.00528541	0.184755	-0.577804	-0.118349	0.08898	-0.340882
SH3BGRL3	1.12479	0.0750263	-0.387726	0.764333	-0.130417	0.28932	0.155447	0.439708	-0.553391	0.094048	-0.186214	-0.15129
STMN1	1.12371	0.0752122	-0.680178	0.624088	0.221298	0.483324	0.0446518	0.00217411	-0.946072	-0.0130744	0.0530011	-1.06312
JTB	1.12368	0.0752176	0.296835	1.22845	0.0761386	-0.411331	-0.0605143	-0.319872	0.34162	0.0539366	-0.0294652	0.105671
CWC27	1.12231	0.075456	-0.394792	0.760599	0.16475	-0.10308	0.123216	0.0702199	-0.761976	-0.217217	-0.412535	0.0676682
ARFGAP3	1.12055	0.0757622	-0.257062	0.83679	0.264374	-0.0361351	0.0141022	0.0358272	-0.411235	-0.0474928	-0.297432	0.00608051
NKIRAS2	1.11863	0.0760982	0.335904	1.26217	-0.522424	-0.166546	0.127132	-0.232173	0.106367	-0.0594605	0.342764	0.159934
TBC1D2	1.11692	0.0763983	-0.395362	0.760298	0.335027	0.161581	-0.00139012	0.209177	-0.220858	-0.00393749	0.050177	-0.702437
CASP14	1.11688	0.0764047	0.865757	1.8223	-1.30736	0.308202	-0.976114	-0.223633	0.117189	-0.0714436	0.675168	0.54321
SUMO3	1.11657	0.076459	-0.369462	0.774071	0.350378	-0.0488862	0.0262362	0.0486653	-0.572093	0.123573	-0.244477	-0.408458
NUDT19	1.11555	0.0766389	0.261624	1.19883	-0.0959125	-0.0601464	-0.151766	0.0140889	0.473672	0.152399	0.224123	-0.0974345
EMC2	1.11346	0.0770081	0.173603	1.12787	0.0396812	-0.0250134	-0.22198	-0.106394	0.230956	0.115314	-0.05484	0.0892775
SSNA1	1.11264	0.0771551	-0.713425	0.609871	1.02948	-0.027238	0.487154	0.063504	-0.950186	-0.0753064	0.110472	-0.385776
ELMOD2	1.11244	0.0771894	0.23572	1.17749	-0.418011	-0.143571	-0.00753183	0.017224	0.0324689	-0.000780841	0.180173	0.179129
NOL10	1.11236	0.0772035	0.330957	1.25785	0.0618699	-0.186844	-0.0570273	-0.206351	0.593757	-0.0992813	0.25183	0.18917
NCALD	1.11235	0.0772067	0.838209	1.78783	-0.538201	-0.499015	-0.598339	0.182566	0.515737	1.38347	0.299042	-0.2984
STRN4	1.10993	0.0776372	0.21676	1.16212	-0.215931	-0.231662	-0.0261803	0.0544	0.277142	0.184648	0.0369315	-0.0510559
LRRC14	1.1095	0.0777141	0.52343	1.43737	-0.633176	-0.0733434	0.0463925	-0.0700501	0.779754	0.0578663	-0.0225015	0.548423
CUL1	1.10864	0.0778676	-0.243758	0.844542	0.123871	0.397218	-0.0619122	0.06223	-0.170973	0.0552495	-0.108639	-0.229263
HIST2H3C	1.10741	0.078089	-0.569591	0.673808	0.0173029	0.645946	0.73951	-0.0166328	-0.159025	0.154259	-0.705021	-0.182451
ATG9A	1.10739	0.0780933	0.359971	1.2834	-0.140132	-0.178358	-0.0629736	-0.0253065	0.19731	0.0147523	0.743191	0.077861
PBRM1	1.10732	0.0781054	0.287188	1.22026	-0.477773	-0.119413	0.00710856	-0.0431124	0.252555	-0.101968	0.156665	0.208311
GANAB	1.10677	0.0782047	0.321302	1.24946	-0.581224	-0.140644	0.13626	-0.256867	0.0952847	0.158375	0.032462	0.156613
LMNB2	1.10667	0.0782222	-0.350158	0.784498	0.11814	0.0381646	0.21717	0.00385723	-0.720611	-0.0148137	-0.166829	-0.121047
NEK9	1.1065	0.078252	0.183029	1.13526	-0.184905	0.00269417	-0.0241776	-0.28894	0.0490991	0.145684	0.125855	-0.0838521
HNRNPR	1.10624	0.0782993	0.646401	1.56526	-1.08234	-0.0750241	-0.0233669	-0.0926907	0.0482979	0.145826	0.800663	0.317396
CCZ1	1.10533	0.0784643	-0.240355	0.846537	-0.0958531	0.106522	0.061787	0.210772	0.0228493	-0.289562	-0.366561	-0.0449176
GPAT4	1.10442	0.0786294	-0.238061	0.847884	0.423578	0.124555	-0.0277949	0.0182088	-0.240927	-0.0999753	-0.0233294	-0.0494676
MINDY1	1.10426	0.0786578	-0.502623	0.705822	0.629377	0.0074034	0.607902	-0.0343049	-0.0960362	-0.590394	0.132736	-0.246421
PTPRF	1.1037	0.0787591	0.219347	1.16421	-0.0716145	-0.146497	0.0886309	-0.0455486	0.430422	0.00759382	0.0921689	0.172173
ASXL2	1.10325	0.0788412	0.531799	1.44573	-1.03257	-0.0338222	-0.0764773	-0.0970875	0.200119	0.0369954	0.277211	0.372915
AIMP2	1.10266	0.0789478	0.463449	1.37883	-0.864933	-0.0437177	0.0213431	-0.157242	-0.0118913	0.349395	0.283809	0.187932
RNF2	1.10176	0.0791111	0.30921	1.23903	-0.0612054	0.0106939	-0.0323231	-0.0376665	0.405763	-0.0613476	0.162756	0.609167
TRAPPC10	1.1017	0.0791229	-0.214482	0.861856	0.0770846	0.101818	-0.0733151	0.0633989	-0.351009	-0.122263	-0.284481	0.0688134
MARCKSL1	1.10122	0.0792099	-0.916929	0.529635	0.24249	1.60602	-0.1516	0.29059	-0.381141	0.134608	-0.81595	-0.617737
BAIAP2L1	1.1012	0.0792136	-0.314369	0.804203	0.17921	0.206468	-0.103903	0.334568	-0.436082	0.0935636	-0.0426332	-0.25598
COA1	1.10072	0.0793004	-0.535134	0.690095	0.439021	-0.0956848	0.0690378	0.073078	-0.91867	0.184798	-0.441888	-0.479323
SYAP1	1.09974	0.0794806	-0.484523	0.714733	0.400989	0.348636	0.154449	-0.084929	-0.744138	-0.0493104	0.146738	-0.472237
HIST2H3PS2	1.09926	0.0795678	-0.218818	0.859269	0.129311	-0.118099	0.133096	0.136561	0.0276268	-0.326408	-0.246026	-0.0495977
ACSL1	1.09777	0.0798411	0.160011	1.1173	-0.273409	-0.123825	-0.0118393	-0.0238232	0.0826649	-0.0338625	0.167371	-0.00902536
ANAPC7	1.09749	0.0798932	-0.236826	0.84861	0.184864	-0.0299227	0.0448323	0.144349	0.0217716	0.0280919	-0.325666	-0.327379
FAM84B	1.09742	0.079907	-0.269718	0.829482	0.0630168	0.408168	-0.0533229	0.0166844	-0.0997638	-0.15653	-0.373667	-0.0143632
TMEM128	1.0972	0.0799468	-0.72076	0.606778	-0.118349	0.656541	0.112061	0.544082	-1.01587	0.313852	-0.723343	-0.263341
CNN3	1.09708	0.0799688	-0.464941	0.7245	0.256535	-0.115439	0.341703	0.294715	-0.721633	-0.0204579	0.119596	-0.459757
LCP2	1.09707	0.079971	-0.482593	0.71569	0.2948	0.47312	-0.0537132	0.169058	0.0776871	-0.058476	-0.833112	-0.233208
PPP4R1	1.09566	0.0802314	0.451983	1.36792	-0.643582	0.170362	-0.216473	-0.540106	-0.191371	0.238361	0.272036	0.259107
IL36A	1.09517	0.0803219	-0.784467	0.580566	0.542944	0.571916	1.43365	-0.222509	0.14092	-0.0983993	-0.242297	-0.612087
PDCD6	1.09431	0.080481	0.259917	1.19741	-0.213495	0.0191512	-0.238142	-0.0305079	0.459972	0.0199007	0.0610227	0.0357804
APOBR	1.09413	0.0805138	-0.630345	0.646022	0.730527	0.153797	0.0158288	0.0335815	0.00846846	-0.285062	-1.1193	-0.191751
PFKP	1.09378	0.0805787	-0.470034	0.721948	0.011082	0.681922	0.0386943	0.450673	0.0501605	-0.149465	0.0163946	-0.614854
RPS27L	1.09331	0.080665	-0.521602	0.696598	0.110497	0.113159	0.43959	-0.00235171	-1.04184	-0.115721	-0.187577	-0.0803752
CARD16	1.09324	0.0806783	-0.711875	0.610526	0.743275	1.0469	-0.0192386	-0.0164279	-0.258397	0.181632	-0.811707	-0.204518
H2AFX	1.09194	0.0809211	-0.388511	0.763918	0.0893027	-0.126803	0.345668	0.156878	-0.348405	-0.0545123	-0.685798	-0.000281993
CCDC25	1.0917	0.0809655	-0.310845	0.806169	-0.0271006	0.282239	0.38212	0.0262175	-0.429071	-0.2073	-0.00625574	0.0627221
MED21	1.09031	0.081225	0.428902	1.34621	-0.396811	0.100784	-0.0419557	-0.13614	0.784749	-0.016839	0.116117	0.357459
PMEL	1.08945	0.0813862	1.02881	2.04035	-0.147292	-0.110802	-0.571321	-0.394751	0.374419	0.107427	2.15242	0.256825
HDAC6	1.08942	0.0813922	-0.407029	0.754175	0.589866	0.0316469	0.281816	-0.0150207	-0.592473	-0.0632178	-0.0166224	-0.067496
CETN3	1.08893	0.0814829	-0.312656	0.805158	0.447105	0.0178141	0.198885	-0.0449937	-0.313099	0.110791	-0.116085	-0.31342
GADD45GIP1	1.08859	0.0815468	0.19218	1.14249	-0.0264285	-0.272633	0.0309311	-0.148367	0.251912	0.119032	-0.00865142	-0.010069
COPB1	1.08697	0.0818513	0.179275	1.13232	-0.243599	0.0379388	-0.00976071	-0.174845	0.034718	0.15098	-0.0474552	0.188593
ALG1	1.08661	0.0819193	0.379375	1.30078	-0.324282	-0.167002	0.156442	-0.285945	0.184738	0.2302	-0.113637	0.595409
SRP68	1.0858	0.0820737	-0.164975	0.891944	0.0724825	0.0851919	-0.021017	-0.0146616	-0.208682	0.037276	-0.29696	-0.069537
NUP188	1.08508	0.0822089	0.599558	1.51525	-1.21513	-0.0952532	0.0145785	-0.467203	0.358349	0.0207867	0.0788979	0.177191
NDUFA13	1.08508	0.0822095	0.46776	1.38296	-0.683907	-0.328932	0.247553	-0.270504	0.538203	0.0786281	0.0177061	0.200712
TRIAP1	1.08405	0.0824046	0.63649	1.55454	-0.516596	-0.182668	-0.41998	0.13666	0.877569	-0.306443	0.742441	0.249811
TSR1	1.08226	0.082744	0.27035	1.2061	-0.36001	-0.00809657	-0.0133331	-0.218975	0.158554	0.278255	-0.164138	0.208315
L2HGDH	1.08163	0.082865	0.272223	1.20767	-0.346273	-0.163288	0.0406228	-0.0494504	-0.057259	0.0865981	0.118187	0.422975
DHCR24	1.08117	0.0829524	0.391355	1.31162	-0.359255	-0.563947	-0.174867	0.145149	-0.171056	0.195649	0.233585	0.354321
ADGRE2	1.08067	0.0830483	-0.355884	0.78139	0.338466	0.201236	0.0480729	-0.149249	-0.00319416	-0.490914	-0.47097	-0.0199327
QTRT1	1.07878	0.08341	-0.379821	0.768533	0.612302	-0.0152604	0.693212	0.0815434	0.0490663	-0.0442111	-0.0765395	-0.0758026
NSMAF	1.07815	0.0835322	0.232696	1.17503	-0.0504076	0.0827166	-0.0742157	-0.0650802	0.381485	-0.0616262	0.13305	0.370889
ABCC1	1.07777	0.0836038	0.240316	1.18125	-0.204335	-0.0629253	0.151973	-0.0506363	0.288276	0.0291313	0.0703771	0.407554
PRKRA	1.07558	0.0840266	0.315139	1.24413	-0.137913	-0.363994	0.130468	-0.307991	0.274123	-0.0803669	0.364363	0.0230074
PPIF	1.07535	0.0840716	-0.529892	0.692606	0.303873	0.716866	-0.104543	0.186261	-0.042582	0.0881898	-0.780259	-0.282461
RND3	1.07488	0.0841622	0.485063	1.39965	-0.703482	0.0681829	-0.232765	-0.172754	0.259388	-0.0369415	0.693558	-0.0165714
TRMT11	1.07377	0.0843787	0.513843	1.42785	-1.01444	0.0523408	-0.128582	-0.265351	0.326438	-0.0474674	0.145035	0.275331
HIST1H1D	1.0737	0.0843924	-0.924804	0.526752	-0.0206805	-0.133464	0.921943	0.655119	-1.159	0.146665	-1.24264	-0.0213172
MESD	1.07212	0.0846991	-0.343276	0.788249	0.104692	-0.0398357	0.0544334	0.0584764	-0.718978	0.0427618	-0.37118	-0.147943
CENPC	1.07134	0.0848519	-0.747755	0.59553	0.383749	-0.121431	0.197389	0.103759	-1.47772	-0.151402	-0.84308	0.0446458
ZNF598	1.07042	0.0850311	0.323877	1.25169	-0.354042	-0.0386048	-0.0356476	-0.000294378	-0.180323	0.385712	0.29787	0.363659
SSBP1	1.06968	0.085177	-0.177419	0.884284	0.135487	0.0662489	0.0107526	-0.0300554	-0.0928783	0.0194543	-0.351752	-0.102066
AGTRAP	1.06757	0.0855917	-0.410828	0.752191	0.535578	0.0841112	-0.130342	0.386233	-0.445468	-0.347264	0.152078	-0.127078
MTMR1	1.06658	0.0857858	0.532054	1.44599	-1.03533	-0.278992	0.118768	-0.372002	-0.107506	0.151198	0.376628	0.140336
PXMP2	1.06605	0.0858917	-0.507766	0.703311	0.741166	0.22551	-0.0543667	0.0176743	0.221636	-0.333892	-0.509736	-0.479087
DMAC2L	1.06533	0.086034	0.455427	1.37119	-0.625368	0.00399255	-0.0254933	-0.124109	0.368229	0.0429074	-0.0453971	0.684992
ALDOC	1.06421	0.0862556	-0.419591	0.747637	0.690976	-0.0188082	0.703329	0.0304617	0.0525621	-0.15657	-0.0661787	-0.102219
MTPN	1.06364	0.0863689	-0.446422	0.733861	-0.0174234	0.0376373	0.279771	0.221241	-0.816198	-0.114272	0.127403	-0.461392
SH3GLB2	1.06148	0.0867997	-0.292225	0.816642	-0.0954414	0.338251	0.321422	0.22567	-0.262491	-0.127634	0.1977	-0.186572
LRRC59	1.06133	0.0868306	-0.371543	0.772955	0.0259491	0.146224	-0.0199413	0.151146	-0.737205	0.124447	-0.317483	-0.252554
SNX9	1.06131	0.0868342	-0.341597	0.789167	-0.139142	0.304588	0.506135	0.288786	0.00806661	0.0413303	-0.0705155	-0.384901
WBP11	1.0613	0.0868366	-0.432031	0.741218	0.358675	0.139367	-0.0533532	0.0167127	-0.830994	-0.0206831	-0.383056	-0.0319903
ABR	1.06116	0.0868638	-0.302933	0.810603	-0.0536218	0.421298	0.0609411	0.261982	-0.286259	0.0589404	0.0391046	-0.332919
SUN2	1.06054	0.0869878	0.316858	1.24561	-0.468615	-0.204952	0.173972	-0.0682894	0.34284	-0.00612067	0.10571	0.257118
SETDB1	1.06052	0.0869929	-0.223007	0.856778	0.340215	-0.0460291	0.0651262	-0.00612343	-0.279732	0.00582703	-0.207058	-0.0578747
MRFAP1	1.05997	0.0871017	0.526262	1.44019	-1.03492	-0.255919	-0.0151558	-0.0204991	-0.0743254	0.243662	0.313071	0.296152
RREB1	1.05962	0.0871717	0.387314	1.30796	-0.564737	-0.249796	0.0816439	-0.10999	0.00831851	0.0410893	0.569637	0.0873338
RINT1	1.05961	0.0871747	0.360959	1.28428	-0.140845	0.0107714	-0.0324025	-0.554423	0.212769	0.160301	0.471471	-0.117604
EMILIN2	1.0583	0.0874382	-0.569609	0.673799	0.517742	-0.126253	0.618157	0.0902657	-0.760268	0.231325	-0.1398	-0.509783
VPS18	1.05776	0.0875467	-0.145965	0.903775	0.199226	0.109618	-0.0340501	-0.00184914	0.00667535	-0.105367	-0.200297	-0.0119257
MEAF6	1.05651	0.087799	-0.442338	0.735941	-0.0276371	0.417369	0.210546	-0.00281035	-0.815759	0.0477536	-0.323974	-0.0799051
LOC107985692	1.05536	0.0880329	-1.66083	0.316257	1.92342	-0.706711	3.15435	1.79943	-0.029222	0.0761345	-0.12259	-0.397152
KLHL41	1.05512	0.0880812	0.761666	1.69545	-0.291467	-0.482533	0.241658	-0.39216	0.433476	1.33758	-0.300041	0.651145
LIG3	1.05467	0.0881714	-0.123154	0.918178	0.233075	0.0468769	0.053328	-0.0409457	0.000211867	-0.0775404	-0.0811194	-0.0418359
SCARB2	1.0543	0.0882478	-0.408766	0.753268	-0.113024	0.405509	0.107619	0.459267	-0.165009	0.195706	-0.281515	-0.524874
SEC61B	1.05383	0.0883417	-0.395029	0.760474	0.641841	-0.111591	0.159356	0.158429	-0.500279	0.0382333	-0.179201	-0.0908343
COL6A5	1.05293	0.0885267	0.949622	1.93137	-0.91742	-0.428295	0.117111	-0.21016	0.0322711	0.0177803	1.77975	0.529918
CD74	1.05272	0.0885676	-0.795777	0.576033	-0.374623	1.17529	0.572525	0.301333	-0.705661	0.244714	-0.70512	-0.342516
SCRN1	1.05269	0.088574	-0.287169	0.819509	0.356232	0.351357	-0.159852	0.323768	0.121648	-0.133745	-0.11668	-0.148395
MFN1	1.05157	0.0888045	0.374488	1.29638	-0.00126953	-0.434487	-0.0144135	-0.0212418	0.47965	-0.12784	0.157966	0.516765
MFSD5	1.05087	0.0889476	0.258524	1.19625	-0.375054	-0.040274	0.0866186	-0.0688096	0.391198	0.0431804	0.0462804	0.155919
PTPN12	1.05084	0.088953	-0.319109	0.801565	0.187511	0.612412	-0.0775888	0.12276	-0.0761225	-0.0696424	-0.283423	-0.0021538
PPWD1	1.05056	0.0890109	-0.19167	0.875592	-0.105877	0.199247	0.0795256	0.278886	-0.0552145	-0.182684	-0.104438	0.0274383
MTPAP	1.04973	0.08918	-0.212964	0.862763	0.131511	0.014991	-0.0367362	0.231997	0.0638769	-0.355131	-0.105542	-0.113298
CD36	1.04915	0.0892997	0.990492	1.98686	0.106161	-0.249344	-0.105458	-0.42013	1.34925	-0.430149	1.73923	0.634864
HTATIP2	1.04898	0.0893351	0.399708	1.31924	-0.113883	-0.133012	-0.483368	0.0960009	0.60496	-0.159489	0.23457	0.28453
CCDC12	1.04882	0.0893667	-0.305058	0.809409	0.232957	-0.0163111	0.25254	0.186085	-0.543829	0.019931	0.0492209	-0.0902858
RABEP1	1.04796	0.0895442	-0.292834	0.816297	0.0317919	-0.0169626	0.0665169	0.0965249	-0.660602	-0.191673	-0.133771	-0.00741756
PHKB	1.04739	0.0896623	0.281779	1.21569	-0.194921	0.0165771	0.0221924	-0.106934	0.566339	-0.0166028	0.0665893	0.247706
APTX	1.04508	0.0901405	0.368223	1.29076	-0.790433	-0.102976	-0.278757	0.0158849	0.183038	-0.00428106	0.103908	0.0339442
KIAA0930	1.04493	0.0901724	-0.38411	0.766251	-0.104501	0.10476	0.140963	0.415815	-0.26744	0.108727	-0.652666	-0.168024
ZNF830	1.04405	0.090355	0.409899	1.32859	0.18829	-0.213047	-0.284956	-0.0647614	0.0803455	-0.0314045	0.70262	0.513561
OMD	1.0434	0.0904906	0.441599	1.35811	-0.747598	-0.362393	-0.266508	0.236191	-0.0840273	0.20065	0.204122	0.305344
KRT7	1.04273	0.0906298	-0.855145	0.55281	1.14173	-0.159502	0.270095	0.252475	-1.31413	-0.245338	0.228313	-0.584628
LSM6	1.0423	0.0907197	-0.435262	0.73956	0.711455	-0.00963709	0.118012	0.0149196	-0.597608	0.0133186	-0.0876325	-0.234375
DPCD	1.04157	0.0908715	-0.49369	0.710206	0.661068	-0.146361	0.191773	0.337438	-0.347884	-0.026381	0.125255	-0.68183
C15orf48	1.03949	0.0913078	0.486834	1.40137	-0.173235	-0.36925	0.120182	-0.117995	0.692989	0.0391833	0.766687	-0.0918235
NDUFB4	1.03934	0.091339	0.270734	1.20642	-0.0215232	-0.450061	0.0263191	-0.119202	0.12153	-0.0932098	0.286195	0.203951
HMBS	1.03916	0.0913784	0.363849	1.28685	-0.107075	0.0475849	-0.0711008	-0.268053	0.557696	-0.219934	0.313053	0.405936
IKBIP	1.03854	0.0915078	-0.387843	0.764271	0.420416	0.0742347	-0.0708671	0.0929018	0.093773	-0.0648917	-0.468894	-0.594676
ATXN2	1.03795	0.0916319	-0.326473	0.797484	0.122942	-0.112435	0.0447868	0.295554	-0.552565	0.0846298	-0.362571	-0.124538
PACSIN3	1.03758	0.0917105	0.161502	1.11845	-0.204558	0.039595	0.00524487	-0.265111	0.0194401	0.135158	0.016306	0.0502775
TMF1	1.03734	0.0917605	-0.217575	0.86001	-0.00550698	0.154628	0.170656	0.00570267	0.109499	-0.0927653	-0.353603	-0.207953
ZADH2	1.03697	0.0918405	0.318648	1.24716	-0.473585	0.190032	-0.0785812	-0.324441	0.286699	-0.0126224	0.112041	0.201899
CD93	1.03441	0.0923827	-0.342404	0.788726	0.564405	-0.192244	0.477548	0.349146	-0.0273863	0.00783126	-0.0913342	-0.0598704
NDUFS1	1.03434	0.0923973	0.23153	1.17408	-0.189479	-0.34111	0.154192	-0.16355	0.155287	-0.0550012	0.151968	0.133919
LTN1	1.03355	0.092566	0.12102	1.0875	-0.126338	-0.00713201	-0.170317	-0.0179205	0.0614815	0.00996082	0.152926	-0.0619968
SUPT4H1	1.03354	0.0925667	0.345349	1.27046	-0.709723	-0.218883	-0.109294	0.0492892	-0.0332033	0.195226	0.183441	0.04732
UEVLD	1.03004	0.0933174	0.23763	1.17905	-0.0848696	0.105402	-0.238704	-0.207091	0.396818	0.0090941	0.0906718	0.0286737
KRT71	1.02983	0.0933621	0.558404	1.47264	0.0482243	-0.265531	-0.0427173	-0.230346	0.343887	-0.147419	1.15949	0.387281
LRCH3	1.02976	0.0933774	-0.242634	0.845201	-0.0682068	0.187072	0.146045	0.0636707	-0.179931	0.13316	-0.386146	-0.209038
ADD2	1.02961	0.0934087	0.891982	1.85572	0.0798765	-0.274225	-0.54709	-0.0816861	1.24744	-0.229887	1.56	0.167254
NDUFB10	1.02924	0.0934892	0.51659	1.43057	-0.584927	-0.23474	0.18203	-0.59431	0.377557	0.286305	0.496423	-0.325871
PPP1CA	1.02675	0.0940259	0.353054	1.27726	-0.636873	0.177181	-0.269808	-0.38621	0.00970699	0.139123	0.179876	-0.032199
MROH1	1.02562	0.0942711	0.330765	1.25768	-0.376762	-0.0332746	0.0113513	-0.279336	0.414966	-0.18405	0.346456	0.0676684
RGS12	1.02454	0.0945056	0.110547	1.07964	-0.0362383	-0.0550372	0.0971104	-0.0953778	0.00424876	0.053091	0.124819	0.170487
COPS4	1.02414	0.0945943	-0.171079	0.888178	0.244823	-0.020492	0.0800158	0.0492161	-0.255751	0.0240426	0.0130006	-0.112045
ITGB1	1.0235	0.0947328	-0.466402	0.723768	0.449033	0.149594	-0.189923	0.18301	0.218826	-0.282422	-0.649635	-0.560661
USP12	1.02321	0.0947967	0.164518	1.12079	-0.141352	0.0238422	-0.0269073	-0.073747	0.0517899	-0.054666	0.300671	0.142112
SLC25A12	1.02303	0.094836	0.269115	1.20507	-0.291186	-0.537466	0.0596234	-0.0372813	0.125435	0.02655	0.051482	0.0666823
MRPS17	1.02278	0.094891	0.225198	1.16894	-0.111642	-0.0900323	-0.00827602	-0.0274119	0.435731	-0.107817	0.163737	0.171779
GTF2A1	1.02271	0.0949054	0.148479	1.1084	-0.220938	-0.134931	-0.100818	0.107801	0.025645	0.0243051	0.141005	0.0540775
URI1	1.02248	0.0949552	0.137049	1.09965	0.108005	-0.0969483	-0.104978	-0.0329936	0.025208	0.0223482	0.216139	0.157584
BCL2L13	1.02231	0.0949932	0.479699	1.39445	-0.681385	-0.316782	0.144638	-0.200222	-0.291593	0.404258	0.452753	0.29963
CASC3	1.02213	0.0950321	0.595201	1.51068	0.0940368	-0.441078	-0.553408	-0.0972322	0.657836	0.171952	-0.305152	0.858486
TNS3	1.02213	0.0950329	-0.248321	0.841875	-0.175428	0.265965	0.201831	0.308963	-0.077864	0.0174944	-0.262014	-0.06957
PDLIM7	1.02156	0.0951562	-0.448793	0.732656	0.526948	0.147294	-0.187036	0.412316	-0.301926	0.254134	-0.409092	-0.438766
PYURF	1.02125	0.0952253	-0.802242	0.573457	0.622506	-0.394139	0.905927	0.468059	-1.21743	-0.377906	-0.167754	0.156472
ARHGEF4	1.02047	0.095395	-0.498542	0.707822	0.954305	-0.236505	0.317124	0.414507	-0.262653	-0.0153947	-0.229611	-0.0370791
PRKAA1	1.02019	0.0954576	0.30816	1.23813	-0.255597	-0.0649915	-0.148745	0.100996	0.578772	0.0663839	-0.0437837	0.26293
KXD1	1.0199	0.0955205	0.261605	1.19881	-0.136362	0.0265185	0.0284007	-0.313696	0.408832	-0.0637489	0.056253	0.249947
RCHY1	1.01961	0.0955851	-0.277183	0.825201	1.47904e-05	0.275895	0.453162	0.000359399	0.0883425	-0.0326835	-0.116915	-0.318045
H2AFY	1.01959	0.0955903	-0.27348	0.827321	0.0195537	-0.00464766	0.211235	0.141098	-0.546048	0.0541581	-0.0853071	-0.149485
CORO1B	1.0188	0.0957628	-0.228669	0.853422	0.211596	-0.0421237	0.019827	0.190266	-0.418158	-0.0561145	-0.083185	0.0223448
RNASE6	1.01807	0.0959256	-0.615195	0.652842	-0.34367	0.811798	0.622274	0.454388	-0.354677	-0.107141	0.198112	-0.652283
IGFBP3	1.01805	0.0959286	0.612029	1.52841	-0.0870388	0.115839	-0.452041	-0.321637	1.11311	0.608817	0.19047	-0.209156
STARD7	1.01766	0.0960153	0.500478	1.41468	-0.0564471	-0.164681	-0.114369	-0.0284167	1.06917	0.0178353	0.537189	0.0138074
SRPX	1.0175	0.0960509	-0.743104	0.597452	0.370693	0.673888	-0.261576	0.189907	0.440474	-1.01438	-0.760421	-0.665177
RANBP9	1.01739	0.0960739	0.162367	1.11912	-0.0713327	0.0736165	-0.099728	-0.129024	0.120021	-0.0746113	0.261389	0.116202
HDAC1	1.01671	0.0962246	-0.275697	0.826051	-0.0465592	0.26237	0.0495445	0.210341	-0.283981	-0.109058	-0.392752	0.1587
NAGLU	1.01609	0.0963622	0.245135	1.1852	-0.290691	0.133355	-0.062674	-0.257842	0.280324	-0.084424	0.135809	0.170981
ITPRID2	1.01531	0.0965355	-0.332902	0.793938	0.0449867	0.113446	-0.0332728	0.398434	-0.212377	0.0278532	-0.0289761	-0.594513
CLDN4	1.01494	0.096619	-0.692685	0.618701	0.626132	1.0208	-0.252762	0.162638	-0.0541226	-0.931728	-0.254556	0.0264768
C21orf59-TCP10L	1.01446	0.0967251	0.342405	1.26787	-0.652342	-0.281629	0.0715851	-0.054196	0.0730612	0.276497	-0.0596676	0.163148
TRAF6	1.01438	0.096744	0.589123	1.50433	-0.199954	-0.440649	0.0683556	-0.109143	1.17446	-0.161382	0.23442	0.427608
ARHGAP9	1.0131	0.0970292	0.669937	1.591	-0.713297	0.305755	-0.300184	-0.309175	1.06239	-0.0217812	0.653179	-0.0309381
UHRF2	1.01188	0.0973007	0.454831	1.37062	-0.664047	-0.0634668	-0.157936	0.034515	0.27918	0.66728	0.191492	-0.169566
TOR1AIP1	1.01108	0.0974803	-0.3026	0.81079	0.566881	-0.00220823	-0.0192305	0.407814	-0.161908	0.0575436	-0.0803455	-0.0724331
PRPSAP2	1.01044	0.097624	0.185718	1.13738	-0.150852	-0.00191199	-0.124616	-0.0248719	0.355936	0.101198	-0.0475108	0.0309956
ETNK1	1.01012	0.0976972	-0.273996	0.827026	0.430796	0.00120149	0.149116	-0.028011	0.00388484	-0.23932	-0.342821	0.0353728
AKT1	1.01003	0.0977178	-0.227524	0.8541	0.22396	-0.0156906	0.277963	-0.0111411	-0.342049	0.0776439	-0.0783321	-0.0922658
UBE2Z	1.00964	0.0978049	-0.298366	0.813173	0.0398219	0.315657	-0.0340422	0.527866	-0.212101	0.141387	-0.0874347	-0.186012
HIST1H3I	1.00738	0.0983151	0.633249	1.55105	-1.12882	0.133237	-0.0998622	-0.994647	0.120141	0.153108	-0.0826297	0.252286
NDUFA9	1.00673	0.0984621	0.383383	1.3044	-0.778227	-0.451185	0.156054	-0.24332	0.033691	0.0407415	0.0962194	0.0462034
EMC7	1.0065	0.0985153	0.206086	1.15355	-0.0656012	0.0238259	-0.191627	-0.00190338	0.41444	-0.0199814	0.0709672	0.123613
HECA	1.00627	0.0985668	0.32251	1.2505	-0.212709	-0.150661	0.070574	-0.101231	0.57517	0.0486934	0.373949	-0.101798
ASCC3	1.00617	0.0985896	-0.16694	0.89073	-0.0743742	0.213078	0.0526561	0.0406397	0.0488296	-0.216624	-0.197222	-0.0707457
GZMK	1.006	0.0986272	-0.948857	0.518043	-0.533111	1.07186	0.488887	1.47398	0.0630023	-0.0132765	-0.850252	-0.493288
TEX10	1.00577	0.0986792	0.290983	1.22347	-0.0769616	-0.0401523	-0.0940111	-0.0458348	0.622303	0.0389677	0.282799	-0.0370983
PRDX3	1.00365	0.0991641	-0.29988	0.81232	-0.0526666	0.0281211	0.423451	0.133292	0.0282025	-0.158427	-0.486933	-0.0501638
UTP25	1.00326	0.099252	0.279806	1.21403	-0.487063	-0.0337522	0.0118113	-0.316867	0.180629	-0.148904	0.206715	0.0549125
ABI1	1.00291	0.0993316	-0.232981	0.850875	0.0493821	-0.0350364	0.0139195	0.0891472	-0.422863	-0.204591	0.119753	-0.306813
HSD17B7	1.00272	0.0993748	0.253454	1.19206	-0.343937	-0.136668	0.133281	-0.042434	0.363248	-0.0403825	0.111412	0.189779
TMX4	1.00272	0.099375	0.362003	1.28521	-0.0725671	-0.227868	0.207919	-0.230998	0.685899	-0.0287714	0.127525	0.339843
SARS	1.00187	0.09957	-0.193886	0.874248	-0.0014867	0.202356	0.00715973	0.0767151	-0.367005	0.0509565	-0.0792709	-0.0954795
FAM98C	1.00178	0.0995898	0.251832	1.19072	-0.162578	-0.185865	-0.117841	0.16847	-0.00460513	0.0533535	0.219613	0.441151
MCCC2	1.00145	0.0996657	0.398663	1.31829	-0.260551	-0.220603	0.298908	-0.387499	0.474392	0.179198	-0.101955	0.473273
TMEM230	1.00047	0.0998928	0.218835	1.16379	0.0181348	-0.362051	0.0119614	-0.254428	0.0431717	-0.0788967	0.192515	0.132168
NSDHL	0.999736	0.100061	0.403483	1.3227	0.0504256	-0.323047	-0.0450069	-0.351533	-0.243768	0.459814	0.159635	0.569088
LMNB1	0.998559	0.100332	-0.263317	0.83317	0.322832	-0.0639335	0.328547	-0.0254608	-0.307035	0.0736541	-0.200851	-0.057052
PRMT5	0.997628	0.100548	0.223769	1.16778	0.127268	-0.232747	-0.159319	-0.2122	0.237276	-0.0786594	0.237969	0.0214936
RGS10	0.997387	0.100603	-0.38823	0.764066	0.144697	0.221827	-0.0132512	-0.0224061	-0.143194	0.0751683	-0.333088	-0.82094
SIRT2	0.997372	0.100607	0.350573	1.27507	0.00896831	-0.00555635	-0.0404099	-0.0212145	0.734563	0.03759	0.0232022	0.548722
HEBP1	0.995689	0.100998	0.240942	1.18176	-0.0728253	-0.333057	0.0504658	-0.0892483	0.153428	-0.143369	0.288128	0.220917
KRT76	0.995146	0.101124	-1.16731	0.445252	0.871356	2.21331	0.0267578	-0.170323	-0.00303456	-0.826307	-0.949995	0.0512139
TMEM126A	0.994655	0.101238	0.244339	1.18455	-0.110622	-0.00108665	0.000343408	-0.43597	0.229691	0.226591	0.0409408	-0.0672003
RASAL2	0.993243	0.101568	-0.431038	0.741728	0.306912	0.55805	-0.0425815	0.00641494	-0.653175	-0.120127	0.177184	-0.29924
SH3PXD2B	0.993066	0.10161	-0.460978	0.726493	0.120715	-0.113187	0.224916	0.434763	-0.709531	0.215696	-0.128418	-0.554454
PLA2G4E	0.989571	0.102431	0.564592	1.47897	-0.207181	0.0401619	-0.134992	-0.179698	-0.00784452	0.157467	0.347179	1.27986
DDX6	0.987789	0.102852	0.161554	1.11849	-0.189989	-0.188508	0.137515	-0.0266054	0.0281873	0.0782484	0.0958862	0.176308
RABAC1	0.986441	0.103171	0.280127	1.2143	-0.0914494	0.000838859	-0.0123074	-0.131588	0.535909	0.00710685	-0.0445651	0.387552
NHLRC2	0.98627	0.103212	0.455076	1.37085	-0.289314	0.0401698	-0.175545	-0.0684853	0.406525	-0.1419	0.141179	0.921325
GNB1L	0.986263	0.103214	0.162999	1.11961	0.0146246	-0.0286802	-0.00863075	-0.122092	0.290468	0.11949	-0.0866741	0.183933
GRK2	0.984801	0.103562	-0.298259	0.813233	0.255937	0.0526891	-0.0661998	0.0288006	0.107095	-0.403406	-0.509859	-0.115641
HIST1H1B	0.984133	0.103721	-0.754531	0.592739	0.551308	-0.241648	0.295339	0.181808	-1.17625	-0.379488	-1.05208	0.376511
SYNM	0.984006	0.103751	0.24772	1.18733	0.150216	-0.141671	-0.133828	-0.227024	0.32502	0.330548	-0.0646462	0.047651
ZER1	0.982772	0.104047	0.312867	1.24217	-0.588393	0.0563994	-0.0806732	-0.269571	0.324362	0.0958079	-0.0747915	0.0238504
MED15	0.979722	0.10478	0.244056	1.18432	-0.398929	-0.0108346	-0.064589	-0.0159502	0.354143	0.158467	0.0037658	-0.0304529
VIM	0.979696	0.104786	-0.493661	0.710221	0.608227	-0.185512	0.61618	0.104001	-0.645211	0.0080938	0.0916706	-0.286302
ANKHD1-EIF4EBP3	0.979229	0.104899	-0.338358	0.790941	0.388014	-0.132035	0.183244	0.203723	-0.590385	-0.0991242	-0.0603954	0.0394168
NAGA	0.978681	0.105031	-0.273288	0.827431	-0.0172766	0.0311861	0.443489	0.0490341	-0.219576	0.124465	-0.169904	-0.321706
DHX37	0.976954	0.10545	-0.148934	0.901916	-0.0533584	0.10407	0.198203	0.118477	-0.10967	0.0808362	-0.0141106	-0.185401
SETD1A	0.976676	0.105517	-0.296057	0.814475	-0.0154422	0.0294436	0.247463	0.279061	-0.543583	-0.0760999	-0.123471	0.099452
NEMF	0.976433	0.105576	0.33077	1.25768	-0.258852	-0.105961	0.0638944	-0.0973063	0.454094	-0.0955063	0.555339	0.0109272
LSM4	0.974365	0.10608	-0.466909	0.723513	-0.223239	0.0999349	0.300366	0.193208	-0.928254	-0.0916231	-0.510391	0.0329025
TUBGCP4	0.97382	0.106214	0.252458	1.19123	-0.115074	0.136451	-0.121494	-0.0559355	0.428039	0.0445475	-0.0246301	0.405821
PCIF1	0.973725	0.106237	0.364954	1.28784	-0.579893	-0.0674155	0.0547919	-0.00957909	0.02913	0.452972	-0.0324329	0.408051
HIP1R	0.97361	0.106265	-0.362581	0.777772	0.118168	0.505754	-0.110313	0.49729	-0.430101	-0.0218311	0.120912	-0.108404
RANBP2	0.973445	0.106305	-0.112952	0.924694	-0.00343212	0.0179272	0.0879545	0.014458	-0.166243	-0.106635	-0.142135	0.0801137
G6PD	0.973341	0.106331	0.221743	1.16614	-0.0142419	-0.356045	-0.200285	0.0869208	0.287426	0.0445334	0.0133535	0.0580077
DPY19L2	0.973298	0.106341	-0.577394	0.670173	0.639139	0.774223	-0.266934	0.0477841	0.107349	-0.0605404	-0.631766	-0.530407
VDAC1	0.972349	0.106574	-0.153927	0.8988	-0.0103758	0.14005	0.0710873	0.0712694	0.0438612	0.00622317	-0.102873	-0.29089
ECHDC1	0.972171	0.106618	-0.310961	0.806104	0.083169	0.0889218	0.220666	-0.0852723	-0.499459	-0.382074	0.193445	-0.248273
SMAD4	0.971385	0.106811	-0.225592	0.855244	0.466299	-0.104033	0.223563	0.141763	-0.0238356	-0.0246205	-0.0980926	-0.0282249
WIPF2	0.971367	0.106815	-0.246784	0.842773	0.108988	0.107849	-0.10615	0.0539716	-0.353507	-0.0685643	-0.456868	0.0564619
ALOX12B	0.970985	0.106909	0.368581	1.29108	-0.245775	0.0151021	-0.385858	-0.0421941	0.191451	-0.231314	0.252535	0.602924
RALA	0.970871	0.106937	-0.425838	0.744406	0.213766	0.11	0.0209947	-0.0294438	-0.732789	0.0188505	0.0430632	-0.717161
KRTDAP	0.970786	0.106958	1.4466	2.72566	-0.428967	-0.46799	-0.403261	0.285025	-0.702939	1.07794	2.89736	1.49886
AIDA	0.970215	0.107099	-0.215071	0.861504	0.122142	0.0683466	0.334825	-0.0147464	-0.0710956	-0.038608	0.08403	-0.324043
NDST1	0.969486	0.107279	0.510621	1.42466	-1.14737	-0.00353134	-0.156229	-0.201437	0.263309	0.00721552	0.250559	0.0128264
C7orf50	0.969217	0.107345	-0.405312	0.755073	-0.190503	0.118835	0.281431	0.281605	-0.742818	0.142828	-0.330901	-0.198991
NIPAL1	0.966785	0.107948	0.532597	1.44653	-0.0663269	0.19115	-0.239057	-0.164559	0.869686	-0.139493	0.172306	0.949096
AGPAT3	0.964742	0.108457	-0.475681	0.719127	0.0179193	0.273134	0.347656	-0.0172461	-0.789098	-0.156711	0.263465	-0.598918
UTP20	0.964406	0.108541	0.199581	1.14837	-0.264805	-0.168704	0.201725	-0.130837	0.0243893	0.145963	0.10538	0.159972
PWP2	0.964235	0.108584	0.142586	1.10388	-0.179473	-0.16155	0.00728431	-0.0277715	0.18495	0.119617	-0.0409716	-0.0547609
CALML5	0.963955	0.108654	1.00786	2.01092	-0.905584	-0.871433	-0.133182	0.193318	0.14923	-0.320588	1.81885	0.667052
PRPF3	0.963011	0.10889	-0.24015	0.846657	0.260574	-0.0819461	0.119701	0.0514031	-0.288914	0.090844	-0.0470217	-0.365777
RHOT2	0.962936	0.108909	0.368246	1.29078	-0.673669	-0.0575012	0.00345992	-0.165295	0.481383	0.0437289	0.135724	-0.0808557
MARCKS	0.96277	0.108951	-0.441121	0.736562	0.0495347	0.00898796	-0.0305784	0.400747	-0.762627	0.212839	-0.231952	-0.554052
MRPS26	0.961906	0.109168	0.421847	1.33964	-0.0161568	-0.183951	0.0604893	-0.30475	-0.0536784	0.046355	0.377636	0.872706
WRNIP1	0.961649	0.109232	-0.186804	0.87855	0.08258	0.319724	0.285931	-0.0676963	-0.0411314	-0.113276	0.0791765	-0.0514455
CUTA	0.961199	0.109346	-0.221549	0.857644	0.103282	-0.128975	0.236787	0.310696	-0.278363	-0.0770977	-0.0532869	0.0443409
FUCA1	0.959533	0.109766	-0.669446	0.628748	-0.472195	0.852117	0.958179	0.399397	-0.39568	-0.56392	-0.025208	0.0445209
RAB3D	0.959164	0.109859	0.283013	1.21673	-0.0641507	-0.273006	-0.0151558	-0.0204991	0.304846	-0.184525	0.463961	0.174958
RWDD4	0.958989	0.109903	-0.204766	0.867679	0.107883	0.258144	-0.000490406	-0.0418453	-0.30244	-0.227868	0.0749896	-0.0400543
MDC1	0.958214	0.1101	-0.618786	0.651219	0.220538	0.00902761	-0.0306189	0.0761627	-0.956794	0.182276	-1.2214	-0.204122
SNX21	0.957873	0.110186	0.567751	1.48221	-0.351662	-0.079752	-0.423621	0.0494195	0.965352	-0.395229	0.429412	0.465855
ZMYND11	0.957341	0.110321	-0.487435	0.713292	0.352688	-0.362888	0.566388	0.236482	-0.418904	-0.224829	-0.653213	0.139877
SNRPE	0.956905	0.110432	0.434206	1.35117	-0.967976	0.0128594	-0.065423	-0.311774	0.112794	0.225038	0.148063	-0.0813848
FXYD3	0.956387	0.110564	-1.5461	0.342434	3.1691	-0.539452	0.441223	1.33647	-0.862569	-0.310769	-0.803964	0.200239
RBM25	0.956303	0.110585	-0.295475	0.814804	-0.0334794	0.0232892	0.035155	0.10493	-0.664885	-0.0202184	-0.351682	-0.015222
PSMD5	0.956279	0.110591	-0.180087	0.88265	-0.132655	0.0432343	0.253751	0.203573	-0.121578	-0.0413042	-0.185234	-0.00432738
MAPKBP1	0.954714	0.11099	0.333673	1.26022	-0.0954183	0.0465159	-0.334845	-0.0752917	0.625096	-0.156049	0.21832	0.188287
MMP8	0.95471	0.110992	-0.565715	0.675621	0.434469	-0.160346	-0.0344975	0.624149	0.107803	-0.524376	-0.939602	-0.0429109
TRIP4	0.954183	0.111126	-0.0950746	0.936224	-0.0472522	0.0480055	0.0567693	0.158106	-0.123181	-0.0309446	0.0116751	-0.0222193
UIMC1	0.953852	0.111211	-0.678824	0.624674	0.263853	-0.23252	0.180375	0.441425	-1.40851	-0.223061	-0.589133	0.158538
CUL2	0.953553	0.111288	-0.284919	0.820788	0.0563569	0.450586	-0.0512123	0.167396	-0.153701	-0.20072	0.173525	-0.335653
PTEN	0.95188	0.111717	-0.283829	0.821408	-0.161136	0.391978	0.316608	0.297359	-0.0983865	-0.0223287	0.121388	-0.291178
DPAGT1	0.951489	0.111818	-0.287883	0.819103	0.276384	-0.0284028	0.537563	-0.00448255	-0.147222	-0.282858	0.0736091	-0.0139984
TREX2	0.950001	0.112201	0.8386	1.78831	-0.0748902	0.0042515	-0.324989	-0.11206	0.785523	-0.000639401	0.119079	1.94275
TPM3	0.949581	0.11231	-0.363035	0.777527	0.441328	0.117813	0.219921	-0.164417	-0.464336	0.0932762	0.00138242	-0.467819
COMMD10	0.947384	0.11288	-0.234034	0.850254	-0.029146	0.245141	0.0129801	0.397692	0.0114377	-0.0491081	-0.30054	0.0287431
INPP5K	0.947252	0.112914	0.160052	1.11733	-0.311152	-0.0128829	-0.00295735	-0.131116	0.0259288	0.0165421	0.181972	-0.0423426
CSK	0.947087	0.112957	-0.250283	0.840732	0.0375346	0.437653	0.198682	-0.0370415	0.149653	-0.235293	-0.103516	-0.175148
ANAPC11	0.947087	0.112957	-0.519236	0.697741	0.608606	0.317136	-0.0833272	0.0445957	0.38117	-0.631585	-0.357653	-0.581864
CDC42	0.946735	0.113049	0.259486	1.19705	-0.357231	-0.052184	-0.0327994	-0.00306868	0.464499	-0.0362998	0.15379	0.0106712
DNAJC8	0.946656	0.113069	-0.516189	0.699217	0.396654	-0.154571	0.145185	0.14436	-1.07456	0.128987	-0.395823	-0.191733
RBM15	0.945854	0.113278	-0.175398	0.885523	0.20324	-0.147999	0.13076	0.139077	0.0197416	-0.225994	-0.128374	-0.0418892
CBLC	0.94571	0.113316	0.677414	1.59927	-1.3116	0.374317	-0.4819	-0.833268	-0.108871	0.145006	0.299639	0.121433
ZW10	0.945278	0.113428	0.278548	1.21297	-0.476751	0.141184	-0.105046	-0.0613504	0.0798597	0.321009	-0.0252445	0.236602
NDUFB5	0.944725	0.113573	0.533052	1.44699	-1.23282	-0.248518	0.0532405	-0.201418	0.272146	0.0327969	0.0666023	0.131143
AKR1B1	0.943921	0.113784	-0.405083	0.755193	-0.212224	0.2594	0.245155	0.0303061	-0.580651	0.0970892	-0.699478	-0.114657
FAM114A1	0.943506	0.113892	-0.233796	0.850394	-0.102511	0.128296	0.135046	0.431205	-0.163377	-0.207439	0.0754805	-0.0478123
TRIM4	0.943282	0.113951	0.292122	1.22444	-0.0812568	0.0113687	-0.097767	-0.0383577	0.242465	-0.157431	0.605224	0.272218
CD58	0.943149	0.113986	0.336522	1.26271	0.113593	-0.263274	-0.592187	-0.11924	0.340588	0.20181	-0.1634	0.105983
ZC3H13	0.941627	0.114386	-0.23893	0.847373	0.0775787	-0.0323886	0.0076691	0.083949	-0.458777	0.0901313	-0.36508	-0.0851885
DOCK1	0.941211	0.114496	0.217521	1.16273	-0.251718	-0.380453	0.0608672	-0.0291989	0.0487807	0.091459	0.211718	-0.0823783
VPS51	0.940593	0.114659	0.148079	1.10809	-0.197521	-0.0387937	-0.0341315	-0.00176967	0.202523	-0.111443	0.122695	0.106326
MPP6	0.93978	0.114874	0.236439	1.17808	0.150232	-0.0934824	-0.0874606	-0.0448833	0.353979	-0.0517902	0.113784	0.454187
RNF222	0.93938	0.114979	0.461092	1.37658	-0.418208	0.156257	-0.198346	-0.219193	0.316686	-0.305943	0.404472	0.749663
TRA2A	0.939259	0.115011	0.609335	1.52556	-0.983474	-0.163188	0.126355	-0.357901	-0.429352	0.508767	0.430659	0.549058
HDHD3	0.937887	0.115375	0.234232	1.17628	-0.322073	-0.0900039	0.0568927	0.00419097	0.397159	-0.0528118	0.0646855	0.176903
KIAA0391	0.937066	0.115594	0.680029	1.60217	-1.48783	-0.224098	0.144625	-0.294842	0.387541	0.228014	-0.0899003	0.332313
SMC5	0.935361	0.116048	-0.152383	0.899763	0.0621323	-0.0599821	0.108777	0.0343629	-0.0728164	-0.0239864	-0.338608	-0.0288299
CALCOCO1	0.935343	0.116053	-0.183304	0.880684	0.161216	0.0533318	-0.0589161	0.119538	-0.112152	-0.235433	0.132278	-0.242738
BCL2L2-PABPN1	0.934593	0.116254	-0.287822	0.819138	-0.0422777	0.0799875	0.134164	0.040284	-0.388846	-0.0675714	-0.578283	0.0955688
COG3	0.934338	0.116322	0.522882	1.43682	-0.34977	-0.0106104	-0.0793846	-0.173465	1.19311	0.0399734	0.0941317	0.151082
AP3M1	0.933588	0.116523	-0.110928	0.925992	0.0119088	0.0857285	0.0530671	0.058962	-0.124534	0.0191723	0.0595501	-0.188233
SPTY2D1	0.932943	0.116696	-0.322662	0.799593	0.23081	0.470166	-0.193296	0.171209	-0.462055	-0.124363	-0.0862177	0.0608791
TTC27	0.932315	0.116865	0.291474	1.22389	-0.391109	0.0236818	0.0414984	-0.25394	0.42083	-0.131584	0.0592174	0.237564
RAB27B	0.932008	0.116948	0.38789	1.30848	-0.643238	0.120801	-0.010807	-0.343789	-0.0813449	0.00559902	0.4468	0.303474
IGSF3	0.931488	0.117088	0.248394	1.18788	-0.367492	-0.0160393	-0.314866	0.05535	0.106716	-0.135351	0.0995077	0.279655
GABARAPL1	0.931428	0.117104	-0.396251	0.75983	-0.157938	0.199493	0.260998	0.138816	-0.37779	-0.263573	-0.724568	0.222296
SGMS1	0.930064	0.117472	0.205421	1.15302	0.0554728	-0.197422	-0.203793	-0.0432629	0.0625436	0.196257	0.302962	-0.129085
SLC25A15	0.929976	0.117496	0.387268	1.30791	-0.537028	0.0506896	-0.0744587	-0.162866	0.323303	0.190004	-0.248996	0.5611
ERGIC2	0.929824	0.117537	0.35014	1.27468	0.25418	-0.132771	-0.230026	-0.0527996	0.708691	0.041554	0.0575051	0.431393
YTHDF1	0.929603	0.117597	0.251941	1.19081	-0.0160025	0.106036	-0.1273	-0.147143	0.528893	0.0462086	-0.0247448	0.272998
ATP5MC2	0.928938	0.117777	-0.402334	0.756633	0.511014	0.0890854	0.353573	-0.122608	0.261631	-0.195257	-0.554246	-0.2904
MRPL41	0.928592	0.117871	0.273843	1.20902	0.0689067	-0.0947846	-0.00956758	-0.176032	0.340626	0.00435096	-0.0227196	0.561636
NDUFAF4	0.927011	0.118301	-0.220353	0.858355	0.124836	0.143299	-0.0216261	-0.0376902	-0.302449	0.0850625	-0.399652	-0.0555553
IRAK1	0.926196	0.118523	0.337667	1.26371	-0.0825852	0.0544137	-0.0785061	-0.182816	0.751897	0.0742986	-0.0661228	0.301103
POLR2L	0.925906	0.118602	0.476966	1.39181	-1.13416	-0.0809437	-0.159019	-0.0785595	0.184737	0.0657747	0.201591	0.00307813
FDX1	0.925502	0.118713	-0.14739	0.902882	0.112343	-0.0101653	0.0405302	-0.0166156	-0.144645	0.101125	-0.174941	-0.245008
SPRYD7	0.925042	0.118839	0.224107	1.16805	-0.0357984	-0.268649	-0.153504	0.0424262	-0.105468	0.0647738	0.389307	0.13229
CAPZA1	0.923871	0.11916	-0.164893	0.891994	-0.0408562	0.171178	0.125117	0.327278	-0.0697609	-0.0340009	0.125486	-0.0985818
NLRX1	0.923548	0.119248	0.449225	1.36531	-0.711033	0	-0.0214545	-0.294661	0.392702	-0.192759	0.600717	-0.0309092
CD3EAP	0.923461	0.119272	-0.243334	0.844791	0.13746	-0.0768695	0.210514	0.0783404	-0.34256	0.0306895	0.0687747	-0.380796
LTBR	0.922821	0.119448	0.348291	1.27305	0.266643	-0.34656	-0.0473219	-0.0699895	0.578829	0.00996082	0.0898057	0.517341
CTSS	0.922538	0.119526	-0.467547	0.723193	0.791298	0.112334	0.102761	-0.116624	0.00803429	-0.241987	-0.71587	-0.0305964
GCC2	0.922427	0.119557	-0.239145	0.847247	-0.111732	0.32224	0.0749512	0.295217	-0.175112	0.15535	-0.198036	-0.158109
CDKAL1	0.922247	0.119606	-0.256953	0.836853	0.342261	-0.01902	-0.0236422	0.145818	0.04857	-0.434041	-0.211817	0.0148919
PIGK	0.92219	0.119622	0.268953	1.20493	-0.470968	-0.0618076	0.0312371	0.0105945	0.365201	-0.0477546	0.0580269	0.209395
PLAC8	0.922094	0.119648	0.762369	1.69627	-0.269995	-0.593379	0.212433	-0.29084	1.20026	0.326305	-0.478109	1.05924
ANKZF1	0.921824	0.119723	-0.176741	0.884699	0.381838	0.0340739	0.013611	0.0233017	0.0107811	-0.0888126	-0.0166078	-0.159501
HMGXB4	0.921747	0.119744	0.186082	1.13767	-0.145841	0.201196	-0.240458	-0.140951	0.175322	0.0662646	0.0312149	0.145471
GOT2	0.921644	0.119772	0.260889	1.19822	-0.116419	-0.434768	0.193641	-0.0440455	0.00982281	0.226533	0.112974	0.292635
CHD2	0.921566	0.119794	0.295374	1.2272	-0.410974	-0.000908182	-0.222847	0.115294	0.395521	-0.113374	0.0844224	0.29549
AFG3L2	0.921379	0.119845	0.215999	1.16151	0.0382243	-0.255751	0.0410508	-0.325382	0.14179	-0.00728757	-0.0372846	0.264919
39326	0.920545	0.120076	-0.274849	0.826537	0.190829	-0.131005	0.264992	0.239118	-0.457088	0.0849401	0.0107152	-0.174027
IKBKG	0.920253	0.120157	-0.337691	0.791307	0.330269	0.00325797	0.116067	0.0875658	-0.720679	-0.0149095	-0.00642693	-0.0715897
MRTFA	0.92006	0.12021	-0.199071	0.871111	-0.113331	0.140155	0.126105	0.0906907	-0.356472	0.0971718	-0.138545	-0.154821
PTGS1	0.919788	0.120285	0.405718	1.32475	-0.139111	-0.274386	0.0919104	-0.136152	0.789721	-0.208142	0.425695	0.157858
RTN4	0.919537	0.120355	1.05732	2.08107	-2.29065	0.0594088	0.00460487	-1.11955	-0.100527	0.496942	0.568729	-0.0820319
HMGB2	0.919039	0.120493	-0.491236	0.711415	0.642521	-0.26761	0.041741	0.122722	-0.662514	0.0696823	-0.71151	-0.12123
MRPS21	0.918263	0.120708	0.251432	1.19039	-0.128198	-0.190365	0.0713435	-0.0990071	0.476391	-0.14751	0.164261	0.166361
MPZL2	0.916929	0.12108	0.624786	1.54198	-1.25184	-0.734054	0.0107738	0.103373	-0.0554595	-0.0164431	0.503184	0.196116
ABLIM2	0.9161	0.121311	0.552431	1.46656	0.0907892	-0.740123	-0.21148	-0.0936386	-0.271891	0.138509	0.89482	0.493835
FKBP1A	0.915301	0.121534	-0.209635	0.864756	0.266414	-0.157971	0.0433476	0.133688	-0.282575	-0.0510155	-0.245649	0.0261774
MBLAC2	0.915173	0.12157	-0.321934	0.799997	0.0211794	-0.00627146	0.497029	-0.0150031	-0.274471	-0.394105	0.178779	-0.301004
MAU2	0.914841	0.121663	-0.310728	0.806235	0.198935	-0.143096	0.182111	0.255337	0.0348775	0.0151976	-0.201588	-0.598111
PPHLN1	0.914489	0.121762	-0.276685	0.825485	-0.0357111	0.0241128	0.144554	0.211149	-0.54816	0.132076	-0.253519	-0.0930347
ZFYVE1	0.913694	0.121985	0.281352	1.21533	-0.28094	0.164228	-0.0670487	-0.141404	0.541199	0.234568	0.0363804	-0.0119056
NUDT5	0.913305	0.122094	-0.350429	0.784351	-0.0425775	0.161037	0.0271659	0.55935	-0.555701	-0.218169	0.046205	0.0309261
MTURN	0.91325	0.12211	0.548592	1.46266	-0.660356	-0.300784	0.0623003	-0.102351	0.867611	-0.399322	0.419325	0.305562
COX7B	0.913025	0.122173	-0.165892	0.891377	0.194787	-0.0467936	0.201867	0.0189158	-0.184541	-0.176756	-0.0340147	0.10052
ARF6	0.913021	0.122174	0.376388	1.29809	-0.62025	-0.107891	0.0797743	-0.156401	-0.195761	0.119372	0.507755	0.269421
NADSYN1	0.912208	0.122403	0.211195	1.15765	-0.228061	-0.149667	0.0935207	-0.0507386	0.403461	-0.00110644	0.100789	0.00669161
VGLL4	0.911153	0.122701	0.299915	1.23107	-0.281178	-0.14513	0.0807219	-0.0853573	0.603382	-0.0510382	0.219845	-0.00347272
TMEM50A	0.911117	0.122711	0.264282	1.20104	-0.0797296	-0.243997	-0.149825	0.199342	-0.0785505	0.104271	0.389137	0.368062
CSNK1G3	0.910731	0.12282	0.280331	1.21447	-0.290419	-0.110001	0.177311	-0.188638	0.136902	-0.139027	0.411448	0.300256
PCM1	0.910534	0.122876	-0.370602	0.77346	0.417065	0.123602	0.535704	-0.163231	-0.388375	-0.179116	0.239415	-0.241193
NME1	0.909289	0.123228	-0.247835	0.842159	0.128472	0.0219566	-0.0293417	0.0295334	-0.596093	0.0240086	-0.15745	-0.111186
DRAP1	0.90886	0.12335	-0.334805	0.792891	0.504868	-0.2419	0.293025	0.223663	-0.348294	0.133717	-0.147614	-0.197373
CA3	0.908757	0.123379	0.426349	1.34383	-0.24136	-0.00379893	-0.289619	0.257715	0.629214	-0.0584501	0.087329	0.770242
RNF145	0.908377	0.123488	-0.29369	0.815813	0.20444	0.344471	-0.177823	0.125672	-0.165039	0.167359	-0.388984	-0.291335
ZWILCH	0.907286	0.123798	0.307261	1.23736	-0.436871	0.0319118	-0.154318	-0.0597205	0.492008	0.0695176	-0.169916	0.218436
MAP3K20	0.906483	0.124027	0.377664	1.29924	-0.231118	0.00957818	-0.421869	-0.0242987	0.754921	0.138398	0.00783451	-0.0582071
S100A4	0.906329	0.124071	-0.354412	0.782188	0.484289	-0.232311	0.604831	0.448517	0.00234411	-0.130401	0.12663	-0.110896
CD99	0.905495	0.12431	-0.878949	0.543763	-0.174713	0.166174	0.981813	0.490436	-1.48116	0.595428	-0.621651	-0.544701
AATF	0.904599	0.124566	0.175643	1.12947	-0.122234	-0.0721901	0.0603727	-0.00420956	-0.079354	0.249876	0.0733301	0.320458
ATP5F1B	0.903875	0.124774	0.237692	1.1791	-0.271866	-0.0501361	0.181426	-0.389733	0.136192	-0.0163957	0.115689	0.184973
RNASEH2B	0.903808	0.124794	0.562961	1.4773	-0.897739	0.140398	-0.178442	-0.659705	0.428304	0.438246	-0.458365	0.248172
NNMT	0.903788	0.124799	-0.560277	0.678172	-0.413306	0.669893	0.709804	0.280166	-0.494182	0.171934	-0.0926792	-0.579623
PRRC2A	0.903457	0.124894	-0.216149	0.86086	0.156899	-0.10644	0.0785069	0.242957	-0.342178	0.105993	-0.0600206	-0.196468
SLC44A2	0.902716	0.125108	0.52135	1.4353	-0.742108	-0.109695	0.0900851	-0.26334	0.920002	-0.179542	0.186308	0.133574
MRPL30	0.902667	0.125122	-0.225678	0.855193	0.365927	0.214647	0.0247369	-0.16468	-0.175928	-0.024553	-0.233313	-0.0282894
FGFBP1	0.902637	0.12513	0.515897	1.42988	0.0603242	-1.06192	-0.0553924	-0.465752	-0.282156	0.296688	0.292934	0.233379
GNAS	0.901653	0.125414	0.319722	1.24809	-0.0224318	-0.181127	-0.127727	0.249677	0.459639	-0.0253721	0.124294	0.638718
SELENOI	0.901355	0.125501	0.882388	1.84342	-1.89014	0.016172	0.086411	-0.824907	0.0173352	0.372422	0.669185	-0.141858
METTL18	0.901342	0.125504	-0.218521	0.859446	0.331768	0.0317296	-0.0228776	-0.0128184	0.0194491	-0.339831	-0.234049	0.00814784
KCTD1	0.900545	0.125735	0.3186	1.24712	-0.380851	0.113831	-0.133664	-0.0800303	-0.155109	0.0671327	0.464119	0.417545
MORF4L1	0.900128	0.125855	-0.198895	0.871218	-0.0691845	0.101257	0.085982	0.209235	-0.3864	0.0572668	-0.0282501	-0.110906
LY75-CD302	0.899761	0.125962	-0.260659	0.834707	0.0263536	0.0295631	0.0424242	0.0254125	0.0349406	-0.634975	-0.242962	-0.0758856
ZNRF2	0.899743	0.125967	-0.267134	0.830969	-0.0832565	0.259903	0.0822278	0.229908	-0.270425	-0.114893	0.1992	-0.393635
MAP4	0.899469	0.126047	-0.637493	0.642829	0.0582111	0.166892	-0.00625211	0.0486706	-1.50548	0.00100197	-0.0260686	-0.751907
B4GALT3	0.899429	0.126058	-0.497377	0.708393	0.166286	0.849112	-0.0281142	-0.00765605	0.30996	-0.519121	-0.387474	-0.413247
F3	0.899408	0.126064	0.878019	1.83785	-0.441749	0.0562926	-0.403047	-0.0859	1.71451	1.12109	0.274639	-0.472564
OSBPL2	0.899149	0.126139	0.526577	1.44051	-0.954008	-0.0152073	-0.204834	-0.0116183	0.220531	-0.30393	0.399037	0.605004
TMEM45A	0.898079	0.126451	0.926858	1.90113	-0.135199	-0.552441	-0.770043	0.258244	-0.434246	0.151035	1.63904	1.15216
DHCR7	0.897411	0.126645	0.522087	1.43603	0.0826976	-0.680066	-0.0794144	-0.610413	0.683001	-0.404684	0.274484	0.248351
PFDN1	0.896786	0.126828	-0.337195	0.791579	0.334965	-0.23114	0.1273	0.189178	-0.643975	0.0320533	-0.232123	-0.0844328
RHCE	0.89646	0.126923	1.48408	2.79739	-0.0224634	0.0268623	-0.744853	-0.0544118	2.20243	-0.501493	3.06417	0.37635
LY6G6C	0.895681	0.127151	0.555313	1.46949	0.238105	-0.0632076	-0.018097	-0.40549	0.0233862	0.0128963	0.782616	1.15366
HNRNPUL1	0.895606	0.127173	0.155618	1.1139	-0.186068	-0.288777	-0.0284195	0.0616855	0.11556	0.106234	0.00795202	-0.0488539
RAI14	0.894876	0.127387	-0.174615	0.886004	0.080798	0.0181272	0.0432199	-0.0453175	0.130488	-0.198683	-0.255295	-0.278143
HOMER1	0.893643	0.127749	0.455689	1.37144	-0.950109	0.141739	-0.447209	-0.0424138	-0.06511	0.0315476	0.317367	0.240958
FARP2	0.893636	0.127751	0.584952	1.49999	-1.13477	0.111211	-0.14306	-0.223404	-0.2566	0.387392	0.636131	0.182865
ADGRG1	0.893629	0.127753	0.370949	1.2932	-0.180793	-0.286767	-0.550802	0.231419	0.217272	0.217948	-0.189044	0.450677
EIF4A2	0.89292	0.127962	-0.239639	0.846957	0.115854	-0.0560455	0.0433082	0.531879	-0.00347789	-0.125039	-0.175378	-0.0196652
ACTR10	0.89269	0.128029	0.0822018	1.05863	-0.00621049	-0.0751281	-0.0175169	-0.0430881	0.0968073	0.0123181	0.137378	-0.0596395
AHCYL1	0.891626	0.128344	-0.248429	0.841812	0.221073	-0.0159315	0.148832	-0.0109034	0.0882033	-0.519608	-0.12201	-0.0972318
SDR39U1	0.891229	0.128461	0.516002	1.42999	-0.854073	-0.830749	0.338124	-0.23392	-0.0482102	0.0932054	0.308336	0.130061
HMOX2	0.890867	0.128568	-0.254346	0.838367	0.16185	0.416681	-0.213579	0.159451	-0.224077	0.0459576	-0.215948	-0.0989146
COX6A1	0.890205	0.128764	1.23016	2.34592	-1.51561	0.766019	-0.658859	-0.869476	-0.332268	0.698101	2.04313	0.233731
WDR5	0.890111	0.128792	-0.187117	0.878359	0.108302	-0.107985	0.183255	0.132344	-0.0381026	0.0559616	-0.340897	-0.109513
HOMER3	0.889699	0.128914	-0.331181	0.794885	0.321136	0.245521	-0.323519	0.170402	-0.374059	0.00233432	-0.48505	-0.0544103
SFT2D1	0.889505	0.128972	-0.370298	0.773623	0.487989	-0.25721	0.490913	0.181284	-0.0387609	-0.00965224	-0.487158	-0.0426467
SPTBN1	0.888702	0.129211	-0.27861	0.824385	0.0273458	0.103882	0.262444	-0.0284662	-0.513178	0.030341	0.0836129	-0.350008
ENO3	0.888609	0.129238	0.86063	1.81583	-0.38962	-0.554965	-0.0131982	0.0760952	0.0381732	1.49804	-0.345948	1.37056
GYPA	0.888504	0.12927	1.10356	2.14884	0.041685	-0.0976117	-0.700919	-0.0413004	1.73489	-0.233732	2.14196	-0.0270207
APOC1	0.888442	0.129288	0.971518	1.9609	0.407591	-0.169182	-0.259788	-0.438713	2.23711	0.049653	0.0489907	1.09022
AFF1	0.888327	0.129322	-0.546441	0.684707	0.321711	0.0270132	0.207607	0.134092	-1.28698	-0.034757	-0.0775315	-0.0960674
HMGB1	0.888173	0.129368	-0.336793	0.7918	-0.0919986	0.0117814	0.278269	0.155115	-0.663835	0.130493	-0.380384	-0.0802784
PGD	0.887566	0.129549	-0.404763	0.75536	0.286471	-0.154529	0.745346	0.13291	-0.0517151	-0.325326	0.176155	-0.407969
BOLA1	0.88739	0.129602	0.179062	1.13215	0.0318987	-0.131891	-0.221983	0.0841787	0.0234092	-0.000838573	0.319863	0.136018
CA13	0.887225	0.129651	-0.744129	0.597028	0.0479102	0.678347	-0.0423912	0.047529	-0.712947	-0.585093	0.470843	-1.41792
RBFOX2	0.88711	0.129685	-0.264277	0.832616	0.170513	0.284931	-0.134639	0.119185	-0.424642	0.120301	-0.0354829	-0.277296
PARP1	0.886916	0.129743	-0.277577	0.824976	-0.162507	-0.00925849	0.39486	0.162956	-0.376696	0.0461467	-0.334692	-0.059016
EPHA1	0.886769	0.129787	0.170946	1.1258	-0.0952854	-0.027488	0.0057532	-0.238948	-0.146507	0.159856	0.224195	0.0902696
RPSA	0.886601	0.129837	0.334393	1.26085	-0.618662	-0.0408362	0.0186002	-0.228504	-0.212023	0.1882	0.389475	0.102517
NUBP1	0.886516	0.129863	-0.37679	0.770149	0.0145565	0.78431	-0.00856301	0.137877	-0.359568	-0.00665394	-0.288266	0.0755067
PGM2L1	0.886334	0.129917	0.670307	1.59141	-0.123488	0.278274	-1.19655	-1.15742	0.357955	-0.0553415	0.15228	0.0271533
POGLUT1	0.886251	0.129942	0.399447	1.319	-0.862855	-0.318698	0.209233	-0.309441	0.212457	0.00231406	0.155648	-0.0543902
MICAL1	0.886176	0.129964	-0.222	0.857376	0.412397	-0.0705632	0.0531851	0.152383	0.101682	-0.252292	-0.0562492	-0.133737
COQ7	0.886113	0.129983	0.353749	1.27788	-0.588631	-0.410571	0.00168221	-0.037536	0.253036	-0.326669	0.19518	0.258391
DDX51	0.88542	0.130191	0.188423	1.13952	-0.259987	-0.180522	0.183954	-0.191968	0.0189992	0.0307899	0.188765	0.0666161
ESF1	0.88535	0.130212	0.355462	1.27939	0.0156975	-0.237201	-0.00969448	0.136602	0.0162258	0.467235	0.0434722	0.800317
TTC39B	0.884543	0.130454	0.650267	1.56946	-1.23858	-0.00217877	-0.163974	-0.0246035	-0.290015	0.372303	0.800299	0.289143
KNSTRN	0.884517	0.130462	-0.503291	0.705495	0.706384	0.0559232	-0.23068	0.180858	-0.820631	0.140514	-0.493569	-0.126994
DNAJC25-GNG10	0.884149	0.130572	0.183795	1.13587	-0.212942	-0.0811945	-0.0656774	0.0283132	0.226193	-0.14399	0.260379	0.0610984
DPP9	0.883371	0.130807	-0.309153	0.807115	0.0211794	0.372383	-0.0151558	0.0978282	0.21294	-0.355261	-0.488681	-0.129376
CYC1	0.883364	0.130809	0.34493	1.27009	-0.595384	-0.039526	0.0173494	-0.0793479	0.253645	0.200044	-0.210459	0.439584
ATG7	0.882469	0.131078	0.368798	1.29128	-0.238746	0.227823	-0.0764596	-0.213674	0.781095	0.0687657	-0.0298766	0.354152
AP2B1	0.88192	0.131244	-0.218686	0.859348	-0.00113261	0.000583419	0.212933	0.477488	-0.0855596	0.106661	-0.13709	-0.0688843
CLCA2	0.881838	0.131269	0.378654	1.30013	-0.284629	-0.0172456	-0.0042645	-0.160115	-0.35308	0.469358	0.523756	0.408326
DUSP3	0.881816	0.131275	-0.234424	0.850024	-0.039685	0.0521289	0.122908	0.141641	-0.3708	-0.0823267	0.159999	-0.367577
TNK1	0.880894	0.131555	0.52679	1.44072	-0.684109	0.114711	-0.313613	-0.0686176	0.974862	0.0565263	-0.170363	0.294505
PPP1R3D	0.879042	0.132117	0.326231	1.25373	0.0506089	-0.0363137	-0.0907221	-0.155456	0.740682	-0.129668	0.313613	0.148413
ATPAF1	0.878939	0.132148	0.400079	1.31958	0.00948917	-0.236447	-0.0834297	-0.00890258	0.92906	0.202871	-0.137889	0.286985
CHERP	0.87892	0.132154	-0.239653	0.846949	0.02994	-0.0150857	0.00387009	0.0170853	-0.592473	0.0360847	-0.0845762	-0.281838
ZNF706	0.878654	0.132235	0.286551	1.21972	-0.110692	-0.199185	0.105665	-0.168954	0.561649	-0.165854	0.22953	0.147711
DCTN1	0.878494	0.132284	-0.209245	0.86499	0.440499	0.00925354	0.0256006	0.080671	-0.0477369	-0.0699106	0.0741117	-0.237421
AMBRA1	0.877511	0.132583	-0.286708	0.81977	0.221755	0.127655	-0.15866	0.218637	0.170645	-0.267743	-0.147635	-0.492712
PPP1R18	0.876699	0.132831	-0.468056	0.722938	0.425838	0.329717	-0.0773648	0.0391381	-0.775963	0.354394	-0.504482	-0.228846
RBBP7	0.876549	0.132877	-0.302691	0.810739	-0.189234	0.306543	0.0659341	0.107693	-0.534578	0.121256	-0.358589	-0.147917
TES	0.876146	0.133001	-0.221674	0.85757	0.310025	0.184	-0.100169	0.0447448	0.0473901	-0.0491173	-0.377079	-0.0692903
MSR1	0.875804	0.133105	-0.268867	0.829971	-0.0266051	0.147167	0.553614	0.0668871	-0.0225735	-0.214173	0.136058	-0.233718
TIMM22	0.875654	0.133152	0.229601	1.17251	-1.47906e-05	-0.218514	0.0966177	-0.302899	0.146333	-0.111205	0.110693	0.347771
EPHB3	0.875091	0.133324	0.140718	1.10245	-0.0554189	0.0616472	-0.179717	-0.0242974	0.0439216	-0.0428345	0.260152	0.103848
TUFM	0.874509	0.133503	0.214202	1.16006	-0.0938905	-0.0140322	0.213943	-0.112373	0.323293	0.0176801	0.0789699	0.430513
CYP4F22	0.874075	0.133636	0.727849	1.65617	-0.903776	0.284777	0.0474411	-0.683246	-0.0253032	-0.189977	0.796959	1.07491
PRUNE2	0.873426	0.133836	0.396692	1.31649	0.0859745	-0.0182159	-0.00668417	-0.0636193	0.641429	0.00143929	0.02907	0.912286
INPP1	0.873273	0.133883	0.507862	1.42194	-0.28888	0.0708452	-0.167315	-0.119134	0.137705	-0.0715121	1.20787	0.252904
TNC	0.872629	0.134082	-0.636848	0.643117	1.42092	-0.0285014	0.0067368	0.818154	0.202686	-0.0467286	-0.363682	-0.122362
YIPF5	0.872309	0.134181	0.231898	1.17438	0.161309	-0.133883	-0.376678	-0.0826692	0.22423	0.244081	0.115046	-0.087686
GDI2	0.871757	0.134352	-0.330917	0.795031	-0.166841	0.334494	0.2922	0.193341	-0.608216	-0.08987	0.106644	-0.0790333
SORD	0.87164	0.134388	-0.284189	0.821203	-0.137763	0.43705	0.133436	0.0699769	-0.112482	-0.0865713	-0.482186	0.0471837
ARHGAP32	0.871507	0.134429	0.355889	1.27977	-0.811944	0.0807517	-0.239834	-0.0431006	0.273165	0.0272981	0.0722574	0.0367082
ATG3	0.8712	0.134524	-0.341226	0.78937	-0.000894071	0.314868	0.00658513	0.145673	-0.552957	-0.0395077	-0.50593	0.199723
RSRC2	0.870075	0.134873	-0.689785	0.619946	0.486983	-0.0540805	0.1394	0.251218	-1.62051	-0.00462661	-0.262928	-0.0475554
ANKRD18B	0.869386	0.135087	0.844806	1.79602	-1.93405	0.0531182	-0.0770955	-0.304352	0.213881	0.133998	0.020656	0.748308
VBP1	0.869141	0.135163	-0.376383	0.770366	0.388158	0.00124445	-0.118072	0.13212	-0.820247	0.0222391	-0.234522	-0.0695519
UXT	0.868708	0.135298	0.21571	1.16128	-0.260282	0.174487	-0.255016	-0.145743	0.270172	-0.0513024	0.148573	0.00884353
NDUFA12	0.868406	0.135392	0.252924	1.19162	0.0331282	-0.564589	-0.0272043	-0.180939	-0.0747924	0.0382301	0.206206	0.102447
TMEM165	0.868019	0.135513	0.248493	1.18797	-0.178074	-0.00776109	-0.0136677	-0.0674078	0.142148	-0.0354106	0.583081	0.0372411
EIF3M	0.868017	0.135514	0.322866	1.25081	-0.704308	0.0192841	-0.0411722	-0.0560937	-0.0687665	0.279621	0.22026	0.0780614
PRKAR1A	0.86739	0.135709	-0.367755	0.774987	0.42864	0.225339	0.0885374	-0.132226	0.2698	-0.184845	-0.547719	-0.397967
MBD2	0.865717	0.136233	0.257345	1.19528	-0.568774	-0.195505	-0.0535223	0.128911	0.0775058	0.0608616	0.0514391	0.150684
TBL3	0.865363	0.136344	0.192277	1.14257	-0.295818	0.119568	-0.0750272	-0.159732	0.273858	0.1233	-0.0345473	-0.00451136
MAD2L1	0.864945	0.136475	-0.528158	0.69344	0.275961	0.376611	-0.241179	0.174863	-0.872995	0.377033	-0.688041	-0.342374
VAMP2	0.864712	0.136549	-0.226655	0.854614	0.350451	0.336886	0.028016	-0.112791	-0.000759159	0.0394578	-0.250647	-0.0921093
PAN2	0.864241	0.136697	-0.195208	0.873447	0.408862	0.115517	0.0612721	-0.0431006	-0.0725435	-0.127169	0.112059	-0.150628
PRPS1	0.864219	0.136704	0.63984	1.55816	-1.43511	0.00523082	-0.116702	-0.0594443	0.315156	0.595133	0.0782109	-0.0351618
FBXO7	0.864091	0.136744	0.38589	1.30667	-0.298816	0.0391351	0.00595789	-0.0497976	0.591091	-0.0114664	0.750021	-0.0896048
ILKAP	0.86374	0.136855	-0.300717	0.811849	-0.0827471	0.293365	0.415145	-0.0198915	-0.451017	0.1489	-0.232274	-0.0626046
[truncated: 6,083 more rows]

## Sheet: S4
S4: Phosphoproteome of NACT resistant and sensitive tongue cancer patients
[truncated: 15,441 more rows]

[truncated: 7 more sheets: S5, S6, S7, S8, S9, S10, S11]
